# Supplementary material for: Chiral spirosiladiphosphines: ligand development and applications in Rh-catalyzed asymmetric hydrosilylation/cyclization of 1,6-enynes with enhanced reactivity
Source: Royal Society of Chemistry journal article supplement (doi:10.1039/d2sc06349b), 2023-01-01
Supplement: d2sc06349b1.pdf [file d2sc06349b1.pdf]

## Supporting Information

# **Chiral Spirosiladiphosphines: Ligand Development and Applications in Rh-Catalyzed Asymmetric Hydrosilylation/Cyclization of 1,6-Enynes with Enhanced Reactivity**

Fei Hou,<sup>1,2</sup> Minjie Liu,<sup>1,2</sup> Tong Ru,<sup>1,2</sup> Zequn Tan,<sup>1,2</sup> Yingtang Ning,<sup>\*1,2</sup> Fen-Er Chen<sup>\*1,2</sup>

<sup>1</sup> Engineering Center of Catalysis and Synthesis for Chiral Molecules, Fudan University, 200433 Shanghai, China

<sup>2</sup> Shanghai Engineering Center of Industrial Catalysis for Chiral Drugs, 200433 Shanghai, China

## Table of Contents

|                                                                                                                                                                      |           |
|----------------------------------------------------------------------------------------------------------------------------------------------------------------------|-----------|
| <b>1. Supporting Figures and Tables.....</b>                                                                                                                         | <b>4</b>  |
| Figure S1. Comparison of calculated structure of L3 with BINAP (L1) and SDP (L2).....                                                                                | 4         |
| Scheme S1. Unsuccessful substrates.....                                                                                                                              | 4         |
| Scheme S2. Deuterium labeling experiments. ....                                                                                                                      | 4         |
| Scheme S3 Effect of ligands for hydrosilylation. ....                                                                                                                | 5         |
| Table S1. Effect of solvents.....                                                                                                                                    | 5         |
| Table S2. Effect of temperature. ....                                                                                                                                | 6         |
| Table S3 Effect of Rh/L3 ratio. ....                                                                                                                                 | 6         |
| Figure S2. <sup>1</sup> H NMR spectra of mixtures of Rh(cod) <sub>2</sub> BF <sub>4</sub> , ligands, and HSiEt <sub>3</sub> .....                                    | 7         |
| Figure S3. Variable temperature <sup>1</sup> H NMR spectra of Rh(cod) <sub>2</sub> BF <sub>4</sub> , SDP (L2), and HSiEt <sub>3</sub> .....                          | 7         |
| Figure S4. <sup>31</sup> P NMR spectra of reaction mixtures. ....                                                                                                    | 8         |
| Figure S5. Reaction of 1a and 2a catalyzed by Rh/L3 monitored by <i>in situ</i> <sup>1</sup> H NMR. ....                                                             | 8         |
| Figure S6. NMR spectra of L3 coordinated with Rh(cod) <sub>2</sub> BF <sub>4</sub> .....                                                                             | 9         |
| Figure S7. GC-MS analysis of the mixture of Rh(cod) <sub>2</sub> BF <sub>4</sub> and L3.....                                                                         | 10        |
| Figure S8. HRMS analysis of Rh/L3. ....                                                                                                                              | 11        |
| Figure S9. Initial rate studies. ....                                                                                                                                | 12        |
| <b>2. General Procedures. ....</b>                                                                                                                                   | <b>13</b> |
| <b>3. Preparation of Si-SDP ligand L3-L6.....</b>                                                                                                                    | <b>14</b> |
| 3.1. Synthesis of Compound (S)-S2. ....                                                                                                                              | 14        |
| 3.2. Synthesis of Compound (S)-S3-1.....                                                                                                                             | 14        |
| 3.3. Synthesis of Ligands L3-L6. ....                                                                                                                                | 16        |
| <b>4. Preparation of 1,6-enynes substrates (1a-1s).....</b>                                                                                                          | <b>18</b> |
| 4.1. Preparation of <i>N</i> -allyl-4-methyl- <i>N</i> -(prop-2-yn-1-yl)benzenesulfonamide (1a). ....                                                                | 18        |
| 4.2. Preparation of <i>N</i> -Methyl- <i>N</i> -prop-2-ynyl- <i>p</i> -toluenesulfonamide (5) and <i>N</i> -allyl- <i>N</i> ,4-dimethylbenzenesulfonamide (7) . .... | 18        |
| 4.3. Preparation of 1a- <i>d</i> and Et <sub>3</sub> SiD. ....                                                                                                       | 19        |
| <b>5. Silylcyclization of 1,6-enynes and derivatization of the silylcyclization products. ....</b>                                                                   | <b>20</b> |
| 5.1. General procedure for asymmetric silylcyclization of 1,6-enynes.....                                                                                            | 20        |
| 5.2. General procedure for the synthesis of racemic products. ....                                                                                                   | 20        |
| 5.3. General procedure for desilylation.....                                                                                                                         | 20        |
| 5.4. Coupling of 3aa with iodobenzene. ....                                                                                                                          | 20        |
| <b>6. Preparation {PdCl<sub>2</sub>[(S)-L3]} (S15).....</b>                                                                                                          | <b>21</b> |
| <b>7. Characterization of Rh-L3.....</b>                                                                                                                             | <b>22</b> |
| <b>8. Characterization data.....</b>                                                                                                                                 | <b>23</b> |
| 8.1. Characterization Data of Deuterated compounds. ....                                                                                                             | 23        |
| 8.2. Characterization Data of 1,6-enynes. ....                                                                                                                       | 23        |
| 8.3. Characterization data of the silylcyclization products (3) and hydrosilylation product (4).....                                                                 | 27        |
| 8.4. Characterization data for the desilylated compounds. ....                                                                                                       | 33        |
| <b>9. X-ray Diffraction Analysis. ....</b>                                                                                                                           | <b>40</b> |
| 9.1. Crystal structure of L3. ....                                                                                                                                   | 40        |
| 9.2. Crystal structure of L3-PdCl <sub>2</sub> .....                                                                                                                 | 44        |

|                                                             |            |
|-------------------------------------------------------------|------------|
| <b>10. Computational Details</b> .....                      | <b>48</b>  |
| 10.1 Computational Methods .....                            | 48         |
| 10.2 Energy Profiles Computed for Hydrosilylation .....     | 48         |
| 10.3 Cartesian Coordinates .....                            | 49         |
| <b>11. References</b> .....                                 | <b>64</b>  |
| <b>12. NMR Spectra</b> .....                                | <b>66</b>  |
| <b>13. HPLC charts for the desilylated compounds.</b> ..... | <b>160</b> |

## 1. Supporting Figures and Tables.

Figure S1. Comparison of calculated structure of L3 with BINAP (L1) and SDP (L2).

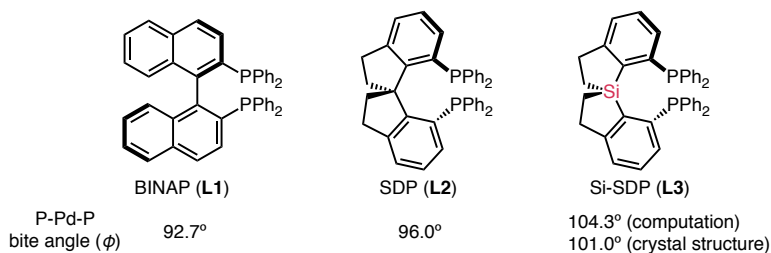

Scheme S1. Unsuccessful substrates.

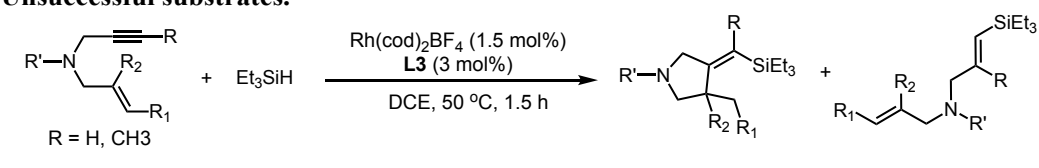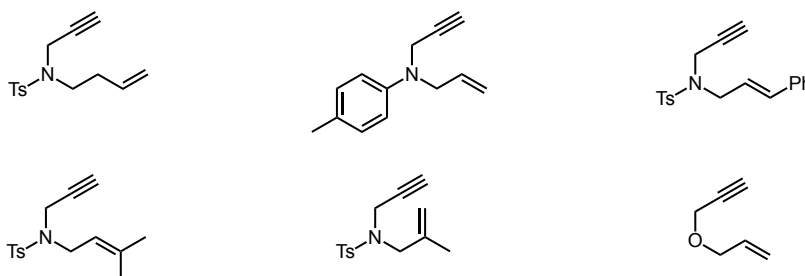

Reaction conditions: Reactions were performed with 1,6-enynes (0.2 mmol),  $\text{Et}_3\text{SiH}$  (0.4 mmol),  $\text{Rh}(\text{cod})_2\text{BF}_4$  (1.5 mol%), **L3** (3 mol%) in DCE (2.0 mL).

Scheme S2. Deuterium labeling experiments.

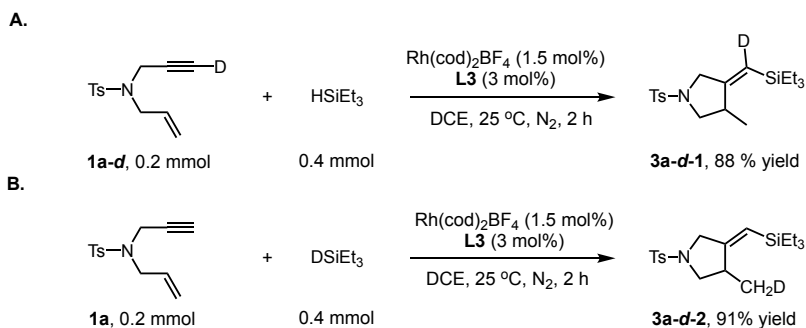



### Scheme S3 Effect of ligands for hydrosilylation.<sup>[a]</sup>

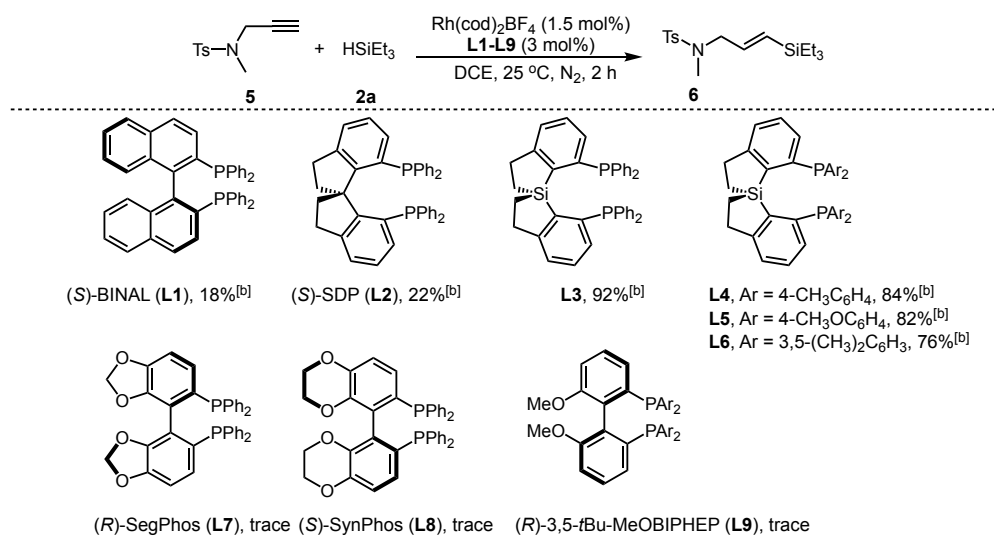

<sup>a</sup> Reactions were performed with **5** (0.2 mmol), **2a** (0.4 mmol),  $\text{Rh}(\text{cod})_2\text{BF}_4$  (1.5 mol%), **L1-L9** (3 mol%) in solvent (2.0 mL). <sup>b</sup> Isolated yield.

### Table S1. Effect of solvents.<sup>[a]</sup>

| Entry    | Solvent                | Yield (%) <sup>[b]</sup> | ee% ( <b>3a</b> ) |
|----------|------------------------|--------------------------|-------------------|
| <b>1</b> | <b>DCE</b>             | <b>93</b>                | <b>91</b>         |
| 2        | THF                    | 69.5                     | 90                |
| 3        | 1,4-Dioxane            | 55                       | 90                |
| 4        | DCM                    | 88                       | 89                |
| 5        | Toluene                | 30                       | 75                |
| 6        | EtOH                   | 21                       | 73                |
| 7        | DMSO                   | 9                        | 74                |
| 8        | $\text{CH}_3\text{CN}$ | NR                       | --                |
| 9        | $\text{Et}_2\text{O}$  | NR                       | --                |

<sup>a</sup> Reactions were performed with **1a** (0.2 mmol), **2a** (0.4 mmol),  $\text{Rh}(\text{cod})_2\text{BF}_4$  (1.5 mol%), **L3** (3 mol%) in solvent (2.0 mL). <sup>b</sup> Isolated yield. <sup>c</sup> ee values were determined by chiral HPLC of the desilylated compounds.

**Table S2. Effect of temperature.** <sup>[a]</sup>

| Entry    | <i>T</i> /°C | Time/h   | Yield/% <sup>[b]</sup> | ee/% <sup>[c]</sup> |
|----------|--------------|----------|------------------------|---------------------|
| 1        | 90           | 1        | 68.5                   | 90                  |
| 2        | 50           | 1.5      | 87                     | 90                  |
| <b>3</b> | <b>rt</b>    | <b>2</b> | <b>91</b>              | <b>91</b>           |
| 4        | 0            | 12       | 80                     | 91                  |

<sup>a</sup> Reactions were performed with **1a** (0.2 mmol), **2a** (0.4 mmol), Rh(cod)<sub>2</sub>BF<sub>4</sub> (1.5 mol%), **L3** (3 mol%) in DCE (2.0 mL). <sup>b</sup> Isolated yield. <sup>c</sup> ee values were determined by chiral HPLC of the desilylated compounds.

**Table S3 Effect of Rh/L3 ratio.** <sup>[a]</sup>

| Entry    | x,y/mol%      | Yield/% <sup>[b]</sup> | ee/% <sup>[c]</sup> |
|----------|---------------|------------------------|---------------------|
| 1        | 5, 6          | 92                     | 91                  |
| 2        | 2.5, 3        | 93                     | 91                  |
| 3        | 1, 2          | 82                     | 90                  |
| 4        | 1, 3          | 82                     | 90                  |
| 5        | 1.5, 2        | 88                     | 91                  |
| <b>6</b> | <b>1.5, 3</b> | <b>91</b>              | <b>91</b>           |

<sup>a</sup> Reactions were performed with **1a** (0.2 mmol), **2a** (0.4 mmol) in DCE (2.0 mL). <sup>b</sup> Isolated yield. <sup>c</sup> ee values were determined by chiral HPLC of the desilylated compounds.

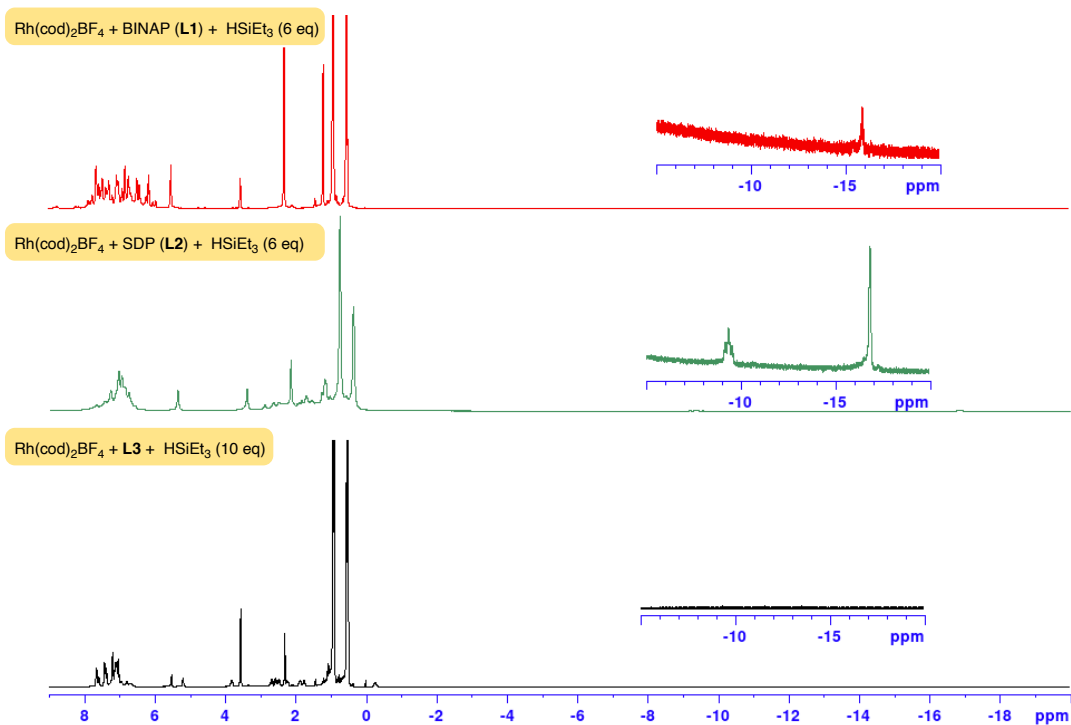

Figure S2.  $^1\text{H}$  NMR spectra of mixtures of  $\text{Rh}(\text{cod})_2\text{BF}_4$ , ligands, and  $\text{HSiEt}_3$ .

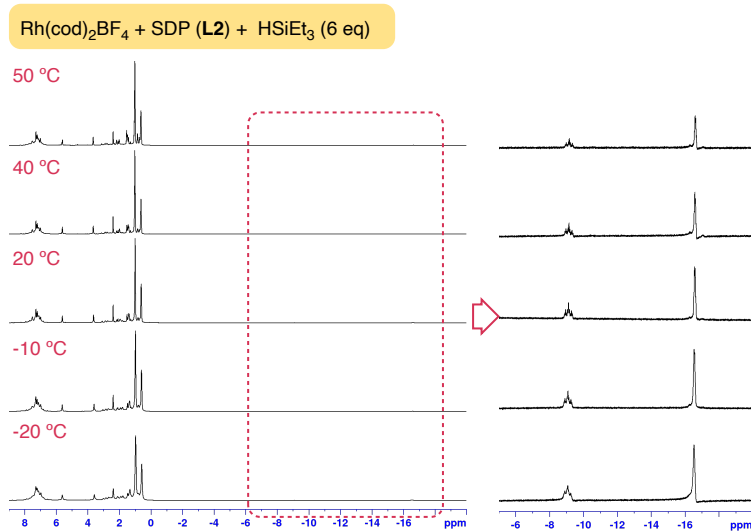

Figure S3. Variable temperature  $^1\text{H}$  NMR spectra of  $\text{Rh}(\text{cod})_2\text{BF}_4$ ,  $\text{SDP}$  (L2), and  $\text{HSiEt}_3$ .

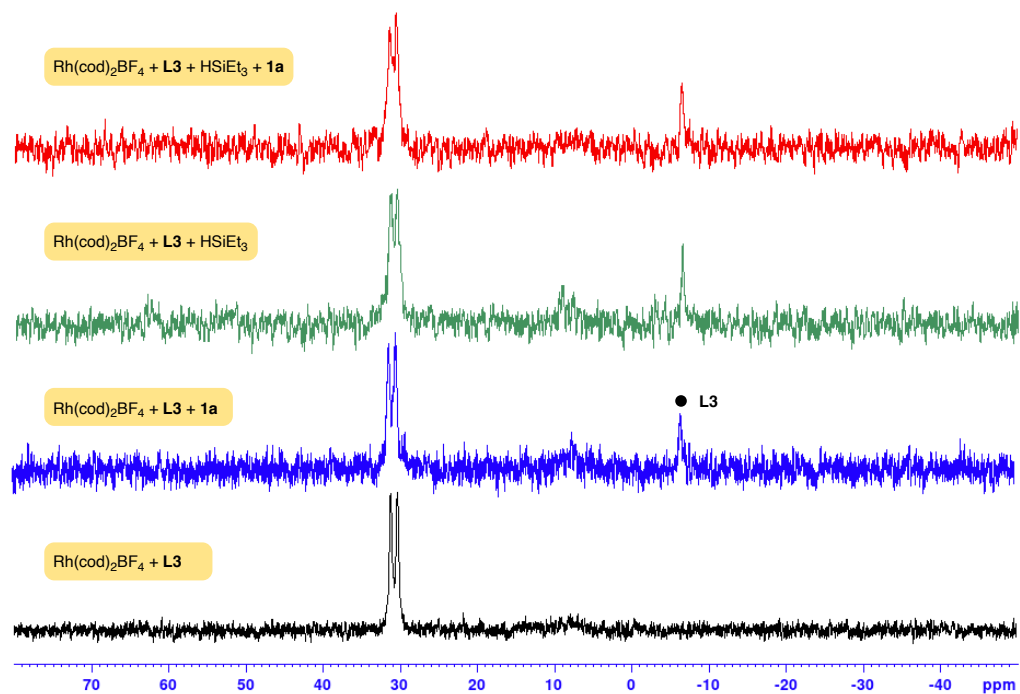

Figure S4.  $^{31}\text{P}$  NMR spectra of reaction mixtures.

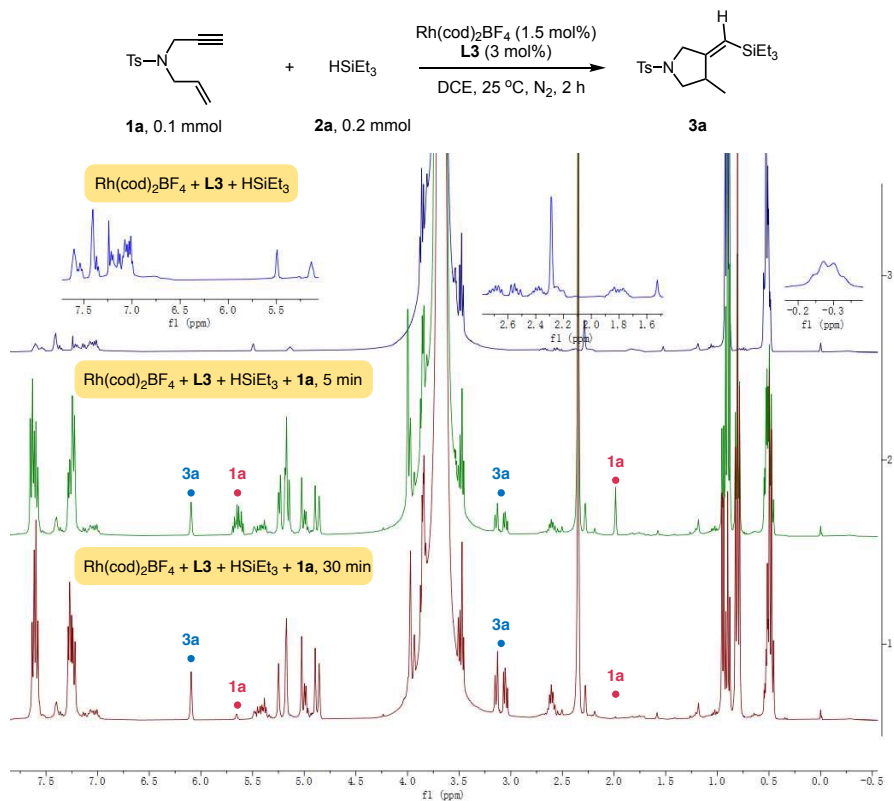

Figure S5. Reaction of 1a and 2a catalyzed by Rh/L3 monitored by *in situ*  $^1\text{H}$  NMR.

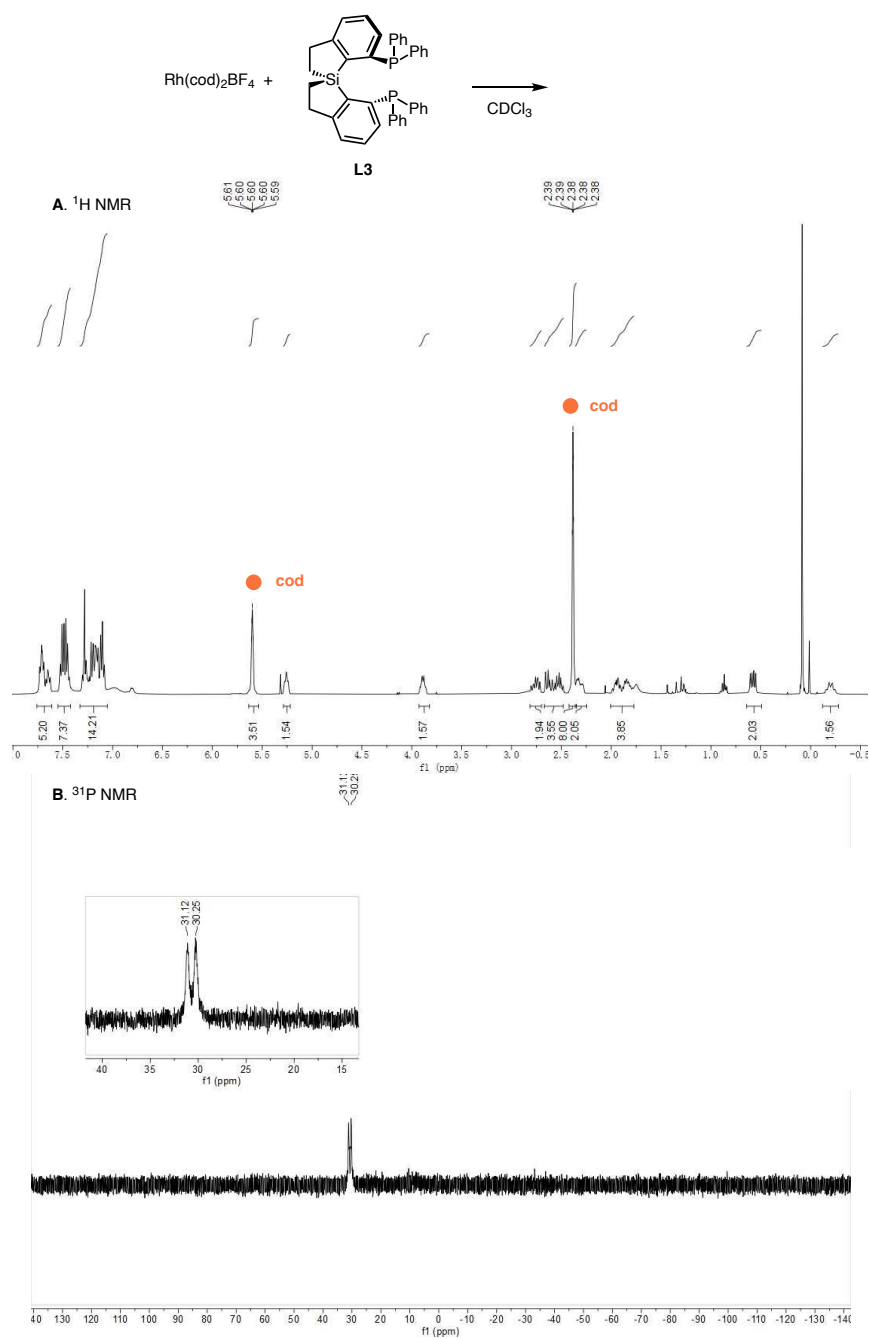

**Figure S6. NMR spectra of L3 coordinated with  $\text{Rh}(\text{cod})_2\text{BF}_4$ .**

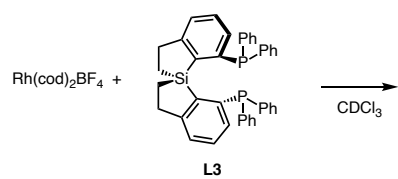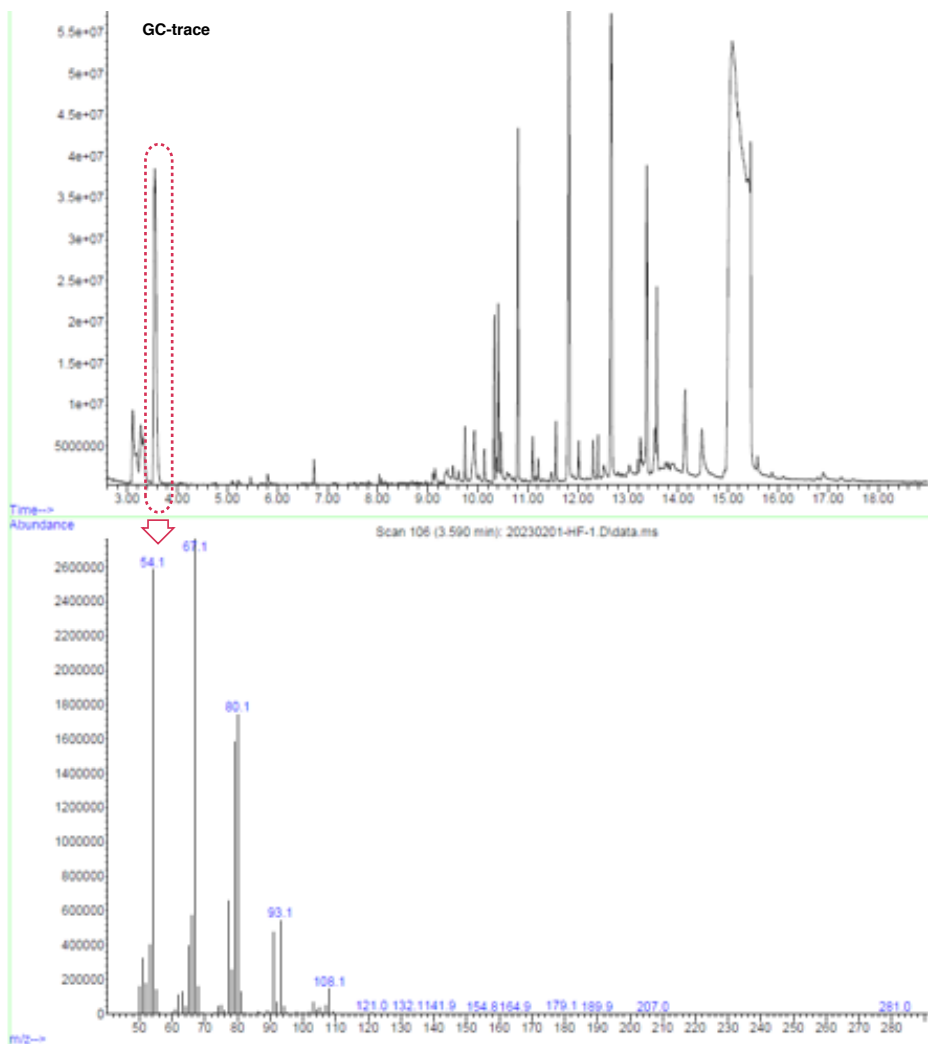

**Figure S7. GC-MS analysis of the mixture of  $\text{Rh}(\text{cod})_2\text{BF}_4$  and L3.**

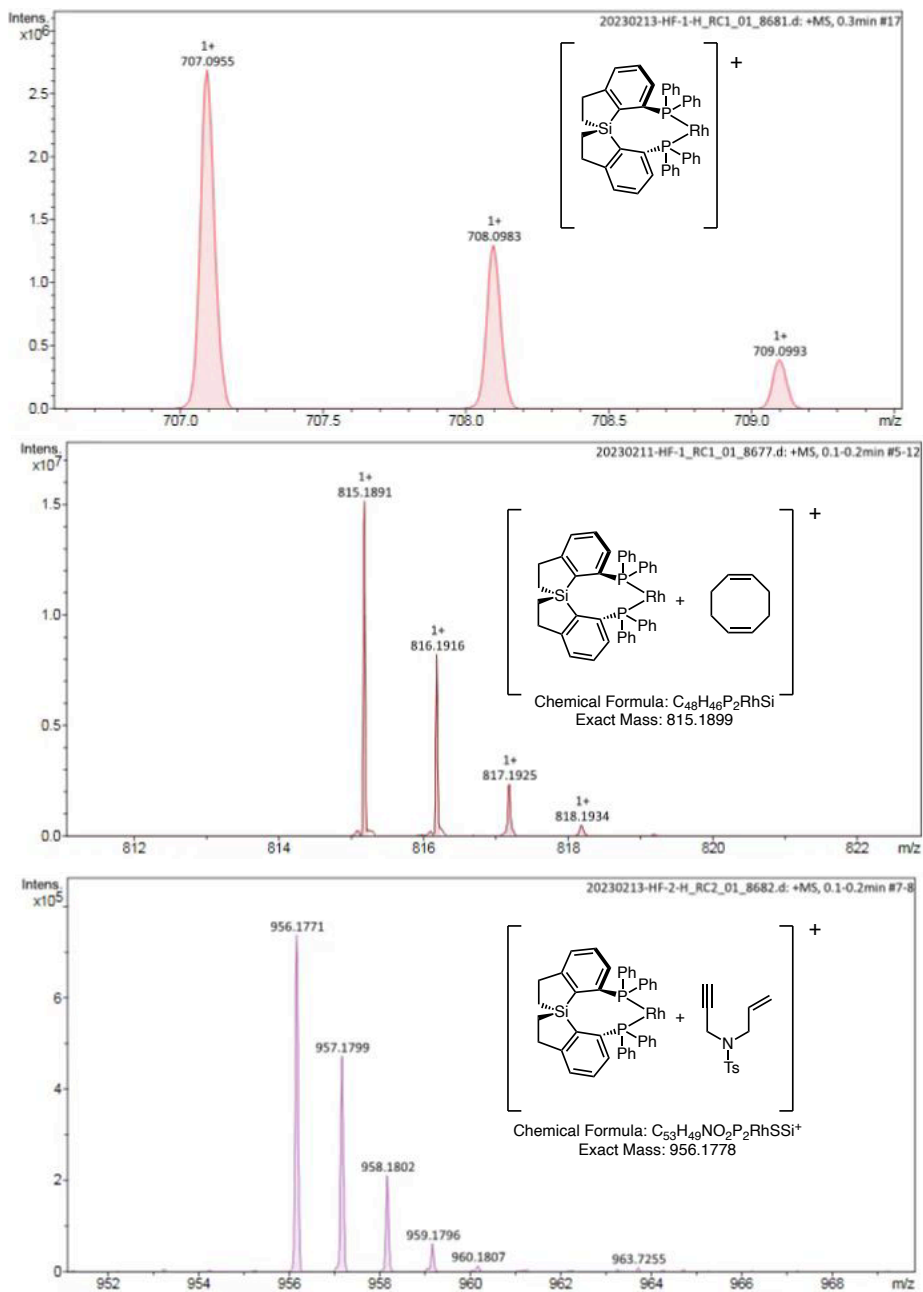

Figure S8. HRMS analysis of Rh/L3.

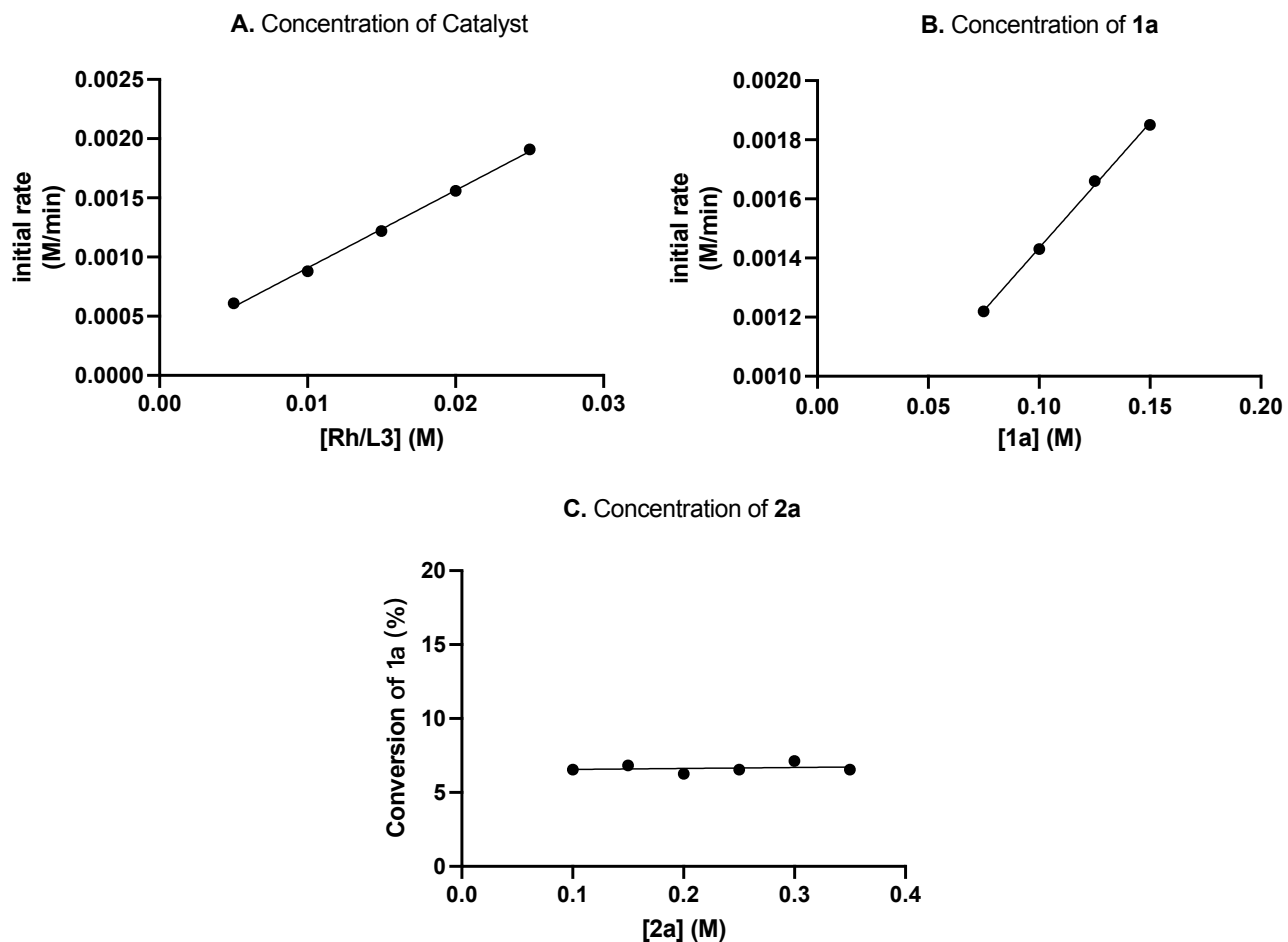

**Figure S9. Initial rate studies.**

Conditions for **A** and **B**: Reactions were performed with  $\text{Rh}(\text{cod})_2\text{BF}_4$ , **L3**, **1a**, and **2a** (2.0 mmol) in DCE (10 mL). Aliquots were removed every 3 min, quenched with saturated  $\text{NH}_4\text{Cl}$  solution, and analyzed by  $^1\text{H}$  NMR using dibromoethane as an internal standard.

Conditions for **C**: Reactions were performed with  $\text{Rh}(\text{cod})_2\text{BF}_4$  (0.01 mmol), **L3** (0.02 mmol), **1a** (1.0 mmol) and **2a** (1.0 mmol to 3.5 mmol) in DCE (10 mL). The reactions were quenched after 10 min using saturated  $\text{NH}_4\text{Cl}$  solution and analyzed by GC-MS.



## 2. General Procedures.

All commercial solvents and chemicals were purchased from Bidepharm, Leyan, Energy Chemical, and TCI and used as received. Dichloroethane (DCE) was purified by passing through activated alumina and stored over 4Å MS. All reactions were performed in oven-dried glassware under a positive pressure of nitrogen.

Analytical thin-layer chromatography (TLC) was carried out using 0.2 mm commercial silica gel plates impregnated with a fluorescent indicator (254 nm). TLC plates were visualized by exposure to UV light (254 nm). Flash column chromatography was performed using granular silica gel (60-Å pore size, 40–63 μm, 4–6% H<sub>2</sub>O content, Syhtnwre).

<sup>1</sup>H NMR spectra were recorded with a Bruker AM400 (400 MHz) spectrometer. Chemical shifts are reported in parts per million (ppm) units on the delta (δ) scale, and are referenced from the residual protium in the CDCl<sub>3</sub> (7.26 ppm). Data are reported as follows: chemical shift, [multiplicity (s = singlet, d = doublet, t = triplet, m = multiplet), coupling constant(s) in Hertz (Hz)]. <sup>13</sup>C NMR spectra were recorded with a Bruker AM 400 (100 MHz) spectrometer. Chemical shifts are reported in parts per million (ppm) units on the delta (δ) scale, and are referenced from the carbon resonances of CDCl<sub>3</sub> (77.23 ppm). <sup>31</sup>P NMR spectra were recorded with a Bruker AM400 (161 MHz) spectrometer. <sup>19</sup>F NMR spectra were recorded with a Bruker AM400 (376 MHz) spectrometer.

Optical rotations were measured on a Autopol I polarimeter. Enantiomeric excess of **3a-3ac** was determined from the corresponding desilylated products using chiral HPLC chromatography. All HPLC analyses were performed on an Agilent 1220 Series HPLC system with *n*-hexane, isopropanol. High resolution mass spectra (HRMS) were recorded on a Bruker microTOF Q III spectrometer with electrospray ionization (ESI). Melting points (mp) were recorded on an SRS–optic melting point apparatus.

### 3. Preparation of Si-SDP ligand L3-L6.

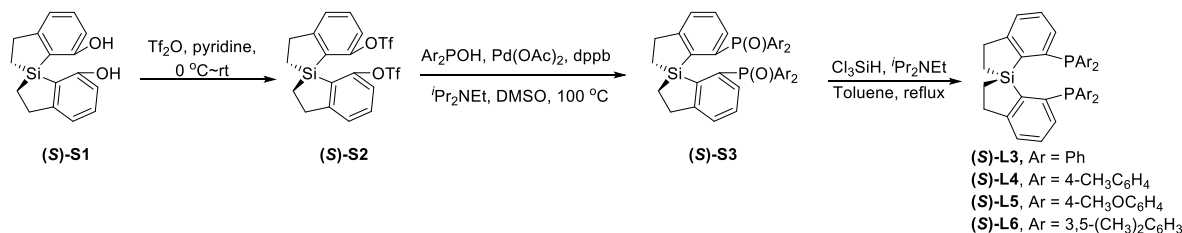

Compound (S)-S1 was synthesized according to literature reports.<sup>[1-2]</sup>

#### 3.1. Synthesis of Compound (S)-S2.

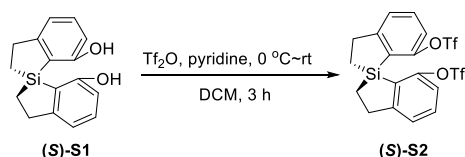

To a solution of (S)-2,2',3,3'-tetrahydro-1,1'-spirobi[benzo[b]silole]-7,7'-diol ((S)-S1) (2.68 g, 10 mmol) in 30 mL of CH<sub>2</sub>Cl<sub>2</sub> was added pyridine (2.5 mL, 30 mmol), and followed by dropwise addition of triflic anhydride (4.25 mL, 25 mmol) at 0 °C. The mixture was stirred at room temperature for 3 h. After removal of the solvent, the residue was diluted with EtOAc (30 mL) and then washed with 5% aqueous HCl, saturated aqueous NaHCO<sub>3</sub> solution, and brine. The organic layer was dried over anhydrous sodium sulfate, concentrated under reduced pressure. The residue was purified by silica gel column chromatography with petroleum ether/EtOAc (10:1) as eluent to give (S)-2,2',3,3'-tetrahydro-1,1'-spirobi[benzo[b]silole]-7,7'-diylbis(trifluoromethanesulfonate) ((S)-S2) (5.2 g, 98% yield) as a white solid.

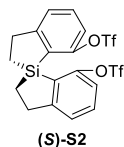

**(S)-2,2',3,3'-tetrahydro-1,1'-spirobi[benzo[b]silole]-7,7'-diyl bis(trifluoromethanesulfonate)((S)-S2).** White solid (5.2 g, 65% yield), mp: 76.2-77.0 °C. [ $\alpha$ ]<sub>D</sub><sup>25</sup> = -75.2 (*c* = 0.5, CH<sub>2</sub>Cl<sub>2</sub>). <sup>1</sup>H NMR (400 MHz, CDCl<sub>3</sub>)  $\delta$  7.45 (t, *J* = 7.9 Hz, 2H), 7.35 (d, *J* = 7.6 Hz, 2H), 7.13 (d, *J* = 8.1 Hz, 2H), 3.45 (ddd, *J* = 16.0, 9.5, 6.1 Hz, 2H), 3.29 (ddd, *J* = 17.4, 9.9, 4.1 Hz, 2H), 1.64 (ddd, *J* = 15.7, 9.6, 4.2 Hz, 2H), 1.34 (dt, *J* = 15.6, 5.8 Hz, 2H). <sup>13</sup>C NMR (100 MHz, CDCl<sub>3</sub>)  $\delta$  158.3, 154.0, 132.9, 128.1, 125.9, 118.4 (q, *J* = 320.2 Hz), 117.0, 31.4, 9.0. <sup>19</sup>F NMR (376 MHz, CDCl<sub>3</sub>)  $\delta$  -74.11. HRMS (ESI) *m/z* calcd for C<sub>18</sub>H<sub>14</sub>F<sub>6</sub>NaO<sub>6</sub>S<sub>2</sub>Si, [M + Na]<sup>+</sup> = 554.9797, found: 554.9799.

#### 3.2. Synthesis of Compound (S)-S3-1.

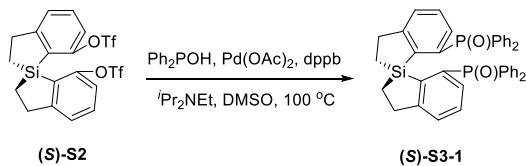

To a mixture of (S)-2,2',3,3'-tetrahydro-1,1'-spirobi[benzo[b]silole]-7,7'-diyl bis(trifluoromethanesulfonate) ((S)-S2) (2.128 g, 4.0 mmol), diphenylphosphine oxide (3.232 g, 16 mmol), palladium acetate (45 mg, 0.2 mmol) and 1,4-bis(diphenylphosphino)butane (dppb, 85 mg, 0.2 mmol) was added 25 mL of degassed DMSO and diisopropylethylamine (2.16 g, 16.8 mmol). The mixture was heated with stirring at 100 °C for 8 hours. After cooling to room temperature, the reaction mixture was diluted with EtOAc, washed with 5% aqueous HCl and saturated aqueous NaHCO<sub>3</sub> solution. The combined organic layers were dried over anhydrous Na<sub>2</sub>SO<sub>4</sub> and concentrated under reduced pressure. The residue was purified by silica gel column chromatography with petroleum ether/EtOAc (3:1) as eluent to give (S)-2,2',3,3'-tetrahydro-1,1'-spirobi[benzo[b]silole]-7-yl)diphenylphosphine oxide ((S)-S3-1) (1.35 g,

75% yield) as a white solid.

((S)-S3-2), ((S)-S3-3), ((S)-S3-4) were synthesized from (S)-S2 by the same procedure as that for (S)-S3-1.

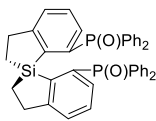

(S)-S3-1

**(S)-(2,2',3,3'-tetrahydro-1,1'-spirobi[benzo[*b*]silole]-7,7'-diyl)bis(diphenylphosphine oxide) ((S)-S3-1).** White solid (1.35 g, 75% yield), mp: 102.5-103.5 °C.  $[\alpha]_D^{25} = -82.4$  ( $c = 0.5$ ,  $\text{CH}_2\text{Cl}_2$ ).  $^1\text{H NMR}$  (400 MHz,  $\text{CDCl}_3$ )  $\delta$  7.59 (dd,  $J = 11.2, 8.0$  Hz, 4H), 7.46-7.33 (m, 8H), 7.30 (t,  $J = 7.3$  Hz, 2H), 7.22 (dd,  $J = 10.9, 7.4$  Hz, 6H), 7.13 (t,  $J = 6.2$  Hz, 4H), 6.98 (dd,  $J = 12.4, 7.4$  Hz, 2H), 3.67-3.53 (m, 2H), 3.19-3.05 (m, 2H), 1.30-1.23 (m, 2H), 0.94-0.85 (m, 2H).  $^{13}\text{C NMR}$  (100 MHz,  $\text{CDCl}_3$ )  $\delta$  156.6 (d,  $J = 13.3$  Hz), 143.8 (d,  $J = 14.3$  Hz), 134.9 (d,  $J = 108$  Hz), 134.5 (d,  $J = 99$  Hz), 134.1, 133.6 (d,  $J = 100.5$  Hz), 133.1 (d,  $J = 2.4$  Hz), 130.8 (d,  $J = 2.5$  Hz), 129.4, 129.3, 129.2 (d,  $J = 3.2$  Hz), 128.1, 128.0 (d,  $J = 1.5$  Hz), 127.6 (d,  $J = 11.9$  Hz), 32.4, 11.5.  $^{31}\text{P NMR}$  (161 MHz,  $\text{CDCl}_3$ )  $\delta$  30.0. HRMS (ESI)  $m/z$  calcd for  $\text{C}_{40}\text{H}_{34}\text{NaO}_2\text{P}_2\text{Si}$ ,  $[\text{M} + \text{Na}]^+ = 659.1696$ , found: 659.1698.

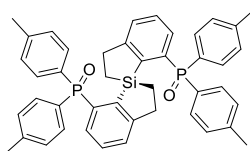

(S)-S3-2

**(S)-(2,2',3,3'-tetrahydro-1,1'-spirobi[benzo[*b*]silole]-7,7'-diyl)bis(dbis(4-methylphenyl)phosphine oxide) ((S)-S3-2).** White solid (40%), mp: 180.3-182.1 °C.  $[\alpha]_D^{25} = -108.3$  ( $c = 0.5$ ,  $\text{CH}_2\text{Cl}_2$ ).  $^1\text{H NMR}$  (400 MHz,  $\text{CDCl}_3$ )  $\delta$  7.53-7.45 (m, 4H), 7.43 (d,  $J = 7.6$  Hz, 2H), 7.26-7.13 (m, 10H), 6.99 (dd,  $J = 12.4, 7.6$  Hz, 2H), 6.93 (dd,  $J = 8.0, 2.4$  Hz, 4H), 3.65-3.56 (m, 2H), 3.16-3.08 (m, 2H), 2.39 (s, 6H), 2.27 (s, 6H), 1.38-1.30 (m, 2H), 0.97-0.86 (m, 2H).  $^{13}\text{C NMR}$  (100 MHz,  $\text{CDCl}_3$ )  $\delta$  156.69 (d,  $J = 13.3$  Hz), 143.88 (d,  $J = 14.5$  Hz), 141.51 (d,  $J = 2.7$  Hz), 141.03 (d,  $J = 2.8$  Hz), 135.75 (d,  $J = 108.6$  Hz), 132.47 (d,  $J = 10.4$  Hz), 132.00 (d,  $J = 9.7$  Hz), 131.41 (d,  $J = 58.6$  Hz), 130.39 (d,  $J = 60.0$  Hz), 129.51 (d,  $J = 15.6$  Hz), 129.29 (d,  $J = 3.1$  Hz), 128.94 (d,  $J = 12.0$  Hz), 128.52 (d,  $J = 12.4$  Hz), 128.07 (d,  $J = 13.6$  Hz), 32.60, 21.59, 11.78.  $^{31}\text{P NMR}$  (161 MHz,  $\text{CDCl}_3$ )  $\delta$  30.11. HRMS (ESI)  $m/z$  calcd for  $\text{C}_{44}\text{H}_{42}\text{NaO}_2\text{P}_2\text{Si}$ ,  $[\text{M} + \text{Na}]^+ = 715.2322$ , found: 715.2315.

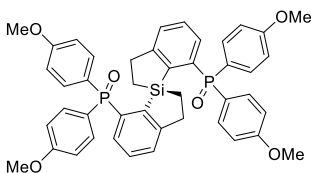

(S)-S3-3

**(S)-(2,2',3,3'-tetrahydro-1,1'-spirobi[benzo[*b*]silole]-7,7'-diyl)bis(dbis(4-methoxyphenyl)phosphine oxide) ((S)-S3-3).** White solid (62%), mp: 160.5-162.0 °C.  $[\alpha]_D^{25} = -113.3$  ( $c = 0.5$ ,  $\text{CH}_2\text{Cl}_2$ ).  $^1\text{H NMR}$  (400 MHz,  $\text{CDCl}_3$ )  $\delta$  7.56-7.48 (m, 4H), 7.43 (d,  $J = 7.6$  Hz, 2H), 7.25-7.21 (m, 2H), 7.20-7.12 (m, 4H), 7.02-6.96 (m, 2H), 6.95-6.88 (m, 4H), 6.66-6.58 (m, 4H), 3.84 (s, 6H), 3.71 (s, 6H), 3.63-3.53 (m, 2H), 3.17-3.09 (m, 2H), 1.40-1.31 (m, 2H), 0.96-0.87 (m, 2H).  $^{13}\text{C NMR}$  (100 MHz,  $\text{CDCl}_3$ )  $\delta$  161.9 (d,  $J = 2.8$  Hz), 161.5 (d,  $J = 2.8$  Hz), 156.5 (d,  $J = 13.3$  Hz), 144.0 (d,  $J = 14.1$  Hz), 136.0 (d,  $J = 109.5$  Hz), 134.2 (d,  $J = 11.6$  Hz), 133.7 (d,  $J = 10.6$  Hz), 129.4 (d,  $J = 15.6$  Hz), 125.8 (d,  $J = 106$  Hz), 125.3 (d,  $J = 107$  Hz), 128.0 (d,  $J = 13.4$  Hz), 113.7 (d,  $J = 12.6$  Hz), 113.2 (d,  $J = 13.1$  Hz), 55.2, 54.9, 32.5, 11.7.  $^{31}\text{P NMR}$  (161 MHz,  $\text{CDCl}_3$ )  $\delta$  29.54. HRMS (ESI)  $m/z$  calcd for  $\text{C}_{44}\text{H}_{42}\text{NaO}_6\text{P}_2\text{Si}$ ,  $[\text{M} + \text{Na}]^+ = 779.2116$ , found: 779.2113.

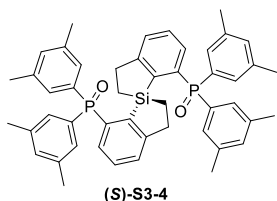

**(S)-(2,2',3,3'-tetrahydro-1,1'-spirobi[benzo[*b*]silole]-7,7'-diyl)bis(dbis(3,5-dimethylphenyl)phosphine oxide) ((S)-S3-4).** White solid (51%), mp: 153.0-155.2 °C.  $[\alpha]_{\text{D}}^{25} = -120.1$  ( $c = 0.5$ ,  $\text{CH}_2\text{Cl}_2$ ).  $^1\text{H NMR}$  (400 MHz,  $\text{CDCl}_3$ )  $\delta$  7.46 (d,  $J = 7.2$  Hz, 2H), 7.31-7.26 (m, 8H), 7.15-7.08 (m, 4H), 6.95 (s, 2H), 6.88 (d,  $J = 12.4$  Hz, 2H), 3.63-3.55 (m, 2H), 3.19-3.08 (m, 2H), 2.32 (s, 12H), 2.04 (s, 12H), 1.27-1.20 (m, 2H), 0.95-0.85 (m, 2H).  $^{13}\text{C NMR}$  (100 MHz,  $\text{CDCl}_3$ )  $\delta$  155.9 (d,  $J = 13.4$  Hz), 144.5 (d,  $J = 13.8$  Hz), 137.6 (d,  $J = 12.1$  Hz), 137.1 (d,  $J = 12.6$  Hz), 135.7 (d,  $J = 107.9$  Hz), 134.5 (d,  $J = 10.9$  Hz), 133.5 (d,  $J = 12.9$  Hz), 132.9 (d,  $J = 2.9$  Hz), 132.8 (d,  $J = 2.8$  Hz), 130.1 (d,  $J = 10.3$  Hz), 129.6 (d,  $J = 9.1$  Hz), 129.4 (d,  $J = 15.6$  Hz), 129.1, 128.1 (d,  $J = 13.5$  Hz), 32.4, 21.4, 21.1, 11.76.  $^{31}\text{P NMR}$  (161 MHz,  $\text{CDCl}_3$ )  $\delta$  29.87. HRMS (ESI)  $m/z$  calcd for  $\text{C}_{48}\text{H}_{51}\text{O}_2\text{P}_2\text{Si}$ ,  $[\text{M} + \text{H}]^+ = 749.3128$ , found: 749.3118.

### 3.3. Synthesis of Ligands L3-L6.

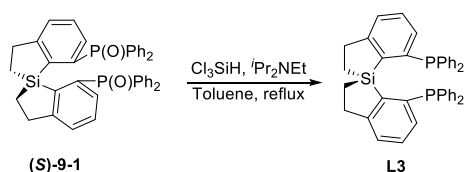

To a mixture of (S)-2,2',3,3'-tetrahydro-1,1'-spirobi[benzo[*b*]silole]-7-yl)diphenylphosphine oxide ((S)-S3-1) (0.636 g, 1 mmol) and diisopropylethylamine (5.47 g, 82 mmol) in toluene (20 mL) was added  $\text{Cl}_3\text{SiH}$  (3.0 mL, 30 mmol) at 0 °C. The reaction mixture was stirred at 110 °C for 3 days. After cooling to room temperature, the mixture was diluted with  $\text{Et}_2\text{O}$  and quenched with small amount of saturated  $\text{NaHCO}_3$ . The resulting suspension was filtered through Celite and the solid was washed with  $\text{Et}_2\text{O}$ . The combined filtrate was dried over  $\text{MgSO}_4$  and concentrated under reduced pressure. The crude product was purified by silica gel column chromatography with pretroleum ether/ $\text{EtOAc}$  (50:1) as eluent to give (S)-7,7'-bis(diphenylphosphanyl)-2,2',3,3'-tetrahydro-1,1'-spirobi[benzo[*b*]silole] ((S)-L3) as a white solid (483 mg, 80% yield). The product was dissolved in pretroleum ether and  $\text{CH}_2\text{Cl}_2$ , layered with hexane, and allowed to stand at room temperature to give white crystals of the title compound, suitable for X-ray study.

((S)-L4, (S)-L5, (S)-L6 were synthesized from (S)-S2 by the same procedure as that for (S)-L3.

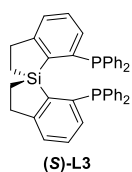

**(S)-7,7'-bis(diphenylphosphanyl)-2,2',3,3'-tetrahydro-1,1'-spirobi[benzo[*b*]silole] ((S)-L3).** White solid (483 mg, 80% yield), mp: 162.2-163.2 °C.  $[\alpha]_{\text{D}}^{25} = -190.2$  ( $c = 1.0$ ,  $\text{CH}_2\text{Cl}_2$ ).  $^1\text{H NMR}$  (400 MHz,  $\text{CDCl}_3$ )  $\delta$  7.29-6.94 (m, 20H), 6.87 (s, 2H), 6.71 (s, 4H), 3.65-3.46 (m, 2H), 3.27-3.07 (m, 2H), 1.20-1.08 (m, 2H), 1.07-0.96 (m, 2H).  $^{13}\text{C NMR}$  (100 MHz,  $\text{CDCl}_3$ )  $\delta$  155.1 (d,  $J = 15.4$  Hz), 146.2, 145.7, 142.4 (d,  $J = 7.7$  Hz), 138.7 (d,  $J = 12.6$  Hz), 137.4 (d,  $J = 12.4$  Hz), 133.4 (d,  $J = 19.6$  Hz), 132.9 (d,  $J = 18.1$  Hz), 130.8, 129.9, 128.2 (d,  $J = 5.9$  Hz), 127.9, 127.8, 126.5, 31.9 (d,  $J = 8.7$  Hz), 9.9 (d,  $J = 5.1$  Hz).  $^{31}\text{P NMR}$  (161 MHz,  $\text{CDCl}_3$ )  $\delta$  -6.58. HRMS (ESI)  $m/z$  calcd for  $\text{C}_{40}\text{H}_{35}\text{P}_2\text{Si}$ ,  $[\text{M} + \text{H}]^+ = 605.1978$ , found: 605.1975.

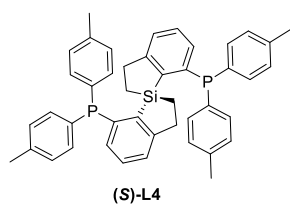

**(S)-7,7'-bis(4- $\text{CH}_3$ -(diphenylphosphanyl))-2,2',3,3'-tetrahydro-1,1'-spirobi[benzo[*b*]silole] ((S)-L4).** White solid

(75 mg, 60% yield), mp: 145.6-147.1 °C.  $[\alpha]_{\text{D}}^{25} = -194.2$  ( $c = 1$ ,  $\text{CH}_2\text{Cl}_2$ ).  $^1\text{H}$  NMR (400 MHz,  $\text{CDCl}_3$ )  $\delta$  7.31-7.27 (m, 4H), 7.14-7.09 (m, 4H), 7.08-7.04 (m, 4H), 6.93-6.90 (m, 2H), 6.87 (d,  $J = 8.0$  Hz, 4H), 6.66 (t,  $J = 8.0$  Hz, 4H), 3.64-3.56 (m, 2H), 3.25-3.19 (m, 2H), 2.36 (s, 6H), 2.28 (s, 6H), 1.21-1.14 (m, 2H), 1.07-0.98 (m, 2H).  $^{13}\text{C}$  NMR (100 MHz,  $\text{CDCl}_3$ )  $\delta$  155.2 (d,  $J = 15.4$  Hz), 146.0, 145.5, 143.1 (d,  $J = 8.1$  Hz), 137.66 (d,  $J = 5$  Hz), 135.5 (d,  $J = 11.1$  Hz), 134.1 (d,  $J = 11.1$  Hz), 133.6 (d,  $J = 19.9$  Hz), 133.0 (d,  $J = 18.1$  Hz), 130.6, 129.8, 129.0 (d,  $J = 6.2$  Hz), 128.7 (d,  $J = 7.2$  Hz), 126.4, 31.9 (d,  $J = 8.6$  Hz), 21.3, 21.3, 10.0 (d,  $J = 5.2$  Hz).  $^{31}\text{P}$  NMR (161 MHz,  $\text{CDCl}_3$ )  $\delta$  -8.27. HRMS (ESI)  $m/z$  calcd for  $\text{C}_{44}\text{H}_{42}\text{NaP}_2\text{Si}$ ,  $[\text{M} + \text{H}]^+ = 661.2604$ , found: 661.2580.

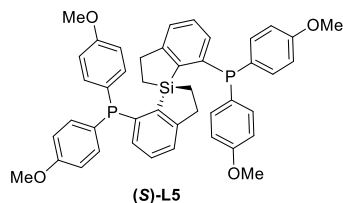

**(S)-7,7'-bis(4-OCH<sub>3</sub>-(diphenylphosphaneyl))-2,2',3,3'-tetrahydro-1,1'-spirobi[benzo[b]silole] ((S)-L5).** White solid (46.8 mg, 75% yield), mp: 185.5-187.1 °C.  $[\alpha]_{\text{D}}^{25} = -201.1$  ( $c = 1$ ,  $\text{CH}_2\text{Cl}_2$ ).  $^1\text{H}$  NMR (400 MHz,  $\text{CDCl}_3$ )  $\delta$  7.29 (d,  $J = 4.9$  Hz, 4H), 7.09 (t,  $J = 7.4$  Hz, 4H), 6.87 (t,  $J = 10.0$  Hz, 6H), 6.64 (m, 8H), 3.82 (s, 6H), 3.73 (s, 6H), 3.60 (m, 2H), 3.23 (m, 2H), 1.19 (m, 2H), 1.03 (m, 2H).  $^{13}\text{C}$  NMR (100 MHz,  $\text{CDCl}_3$ )  $\delta$  159.6, 155.2 (d,  $J = 14.7$  Hz), 143.8, 135.0 (d,  $J = 21.2$  Hz), 134.3 (d,  $J = 19.3$  Hz), 130.3, 130.0, 130.1, 129.8, 128.7, 128.6, 126.3, 113.9 (d,  $J = 6.7$  Hz), 113.5 (d,  $J = 7.9$  Hz), 55.1, 54.97, 32.0 (d,  $J = 8.3$  Hz), 10.0 (d,  $J = 6.3$  Hz).  $^{31}\text{P}$  NMR (161 MHz,  $\text{CDCl}_3$ )  $\delta$  -9.92. HRMS (ESI)  $m/z$  calcd for  $\text{C}_{44}\text{H}_{43}\text{O}_4\text{P}_2\text{Si}$ ,  $[\text{M} + \text{H}]^+ = 725.2394$ , found: 725.2393.

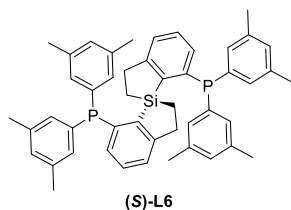

**(S)-7,7'-bis(3,5-(CH<sub>3</sub>)<sub>2</sub>-(diphenylphosphaneyl))-2,2',3,3'-tetrahydro-1,1'-spirobi[benzo[b]silole] ((S)-L6).** White solid (36 mg, 50% yield), mp: 163.7-165.2 °C.  $[\alpha]_{\text{D}}^{25} = -155.7$  ( $c = 0.5$ ,  $\text{CH}_2\text{Cl}_2$ ).  $^1\text{H}$  NMR (400 MHz,  $\text{CDCl}_3$ )  $\delta$  7.33 (s, 4H), 7.09 (s, 2H), 6.88 (s, 2H), 6.77-6.73 (m, 6H), 6.38-6.22 (m, 4H), 3.59-3.50 (m, 2H), 3.28-3.10 (m, 2H), 1.99 (s, 12H), 2.22 (s, 12H), 1.14-0.98 (m, 4H).  $^{13}\text{C}$  NMR (100 MHz,  $\text{CDCl}_3$ )  $\delta$  155.1 (d,  $J = 16.0$  Hz), 146.9, 146.3, 143.3 (d,  $J = 8.6$  Hz), 139.1 (d,  $J = 11.9$  Hz), 137.5, 137.3 (d,  $J = 6.6$  Hz), 137.0 (d,  $J = 7.8$  Hz), 131.5 (d,  $J = 20.5$  Hz), 130.8, 130.5 (d,  $J = 17.7$  Hz), 129.9, 129.8 (d,  $J = 62.8$  Hz), 126.4, 31.9 (d,  $J = 9.2$  Hz), 21.4, 21.1, 10.0 (d,  $J = 5.5$  Hz).  $^{31}\text{P}$  NMR (161 MHz,  $\text{CDCl}_3$ )  $\delta$  -5.80. HRMS (ESI)  $m/z$  calcd for  $\text{C}_{48}\text{H}_{51}\text{P}_2\text{Si}$ ,  $[\text{M} + \text{H}]^+ = 717.3230$ , found: 717.3222.

## 4. Preparation of 1,6-enynes substrates (1a-1s).

### 4.1. Preparation of *N*-allyl-4-methyl-*N*-(prop-2-yn-1-yl)benzenesulfonamide (1a).

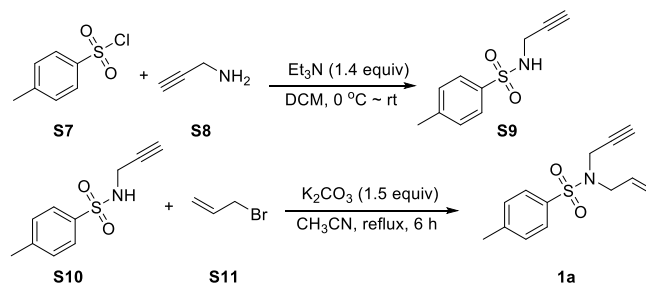

To a solution of propargylamine (3.35 g, 3.84 mL, 60 mmol) and triethylamine (8.48 g, 11.65 mL, 84 mmol) was added tosyl chloride (9.53 g, 50 mmol) portionwise at 0 °C. The mixture was stirred at 25 °C for 3 h. Water (50 mL) was added to the mixture. The mixture was extracted by dichloromethane (2 × 50 mL). The combined organic phases were dried over Na<sub>2</sub>SO<sub>4</sub> and concentrated under reduced pressure. The crude product was used directly in the next step without further purification.

To a suspension of *N*-(prop-2-yn-1-yl)-4-methylbenzenesulfonamide (3.2 g, 15.3 mmol) and K<sub>2</sub>CO<sub>3</sub> (3.16 g, 23 mmol) in acetonitrile was added allyl bromide (2.98 g, 2.13 mL, 23 mmol) dropwise. The mixture was stirred at 80 °C for 3 h and concentrated under reduced pressure. The mixture was diluted with EtOAc and filtered through Celite. The solid was washed with EtOAc. The combined filtrate was dried over Na<sub>2</sub>SO<sub>4</sub> and concentrated under reduced pressure. The residue was purified by column chromatography on silica gel eluting with petroleum ether/EtOAc (15:1) to give the product **1a**.

1,6-enynes **1a-1s** were prepared following the general procedures. **1a**<sup>[3]</sup>, **1b**<sup>[3]</sup>, **1e**<sup>[5]</sup>, **1g**<sup>[4]</sup>, **1i**<sup>[5]</sup>, **1n**<sup>[6]</sup>, **1p**<sup>[7]</sup>, **1r**<sup>[3]</sup> were reported compounds.

### 4.2. Preparation of *N*-Methyl-*N*-prop-2-ynyl-*p*-toluenesulfonamide (**5**) and *N*-allyl-*N*,4-dimethylbenzenesulfonamide (**7**).<sup>[8]</sup>

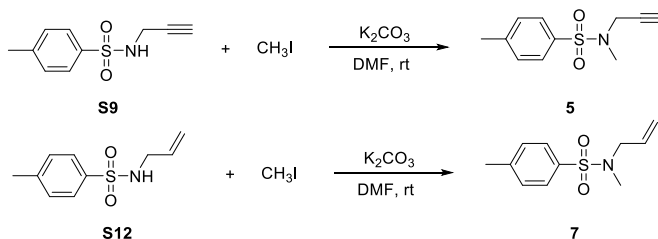

4-Methyl-*N*-(prop-2-yn-1-yl)benzene-1-sulfonamide (2.88 g, 13.8 mmol) was dissolved in DMF and the solution was stirred at room temperature. To this solution was added K<sub>2</sub>CO<sub>3</sub> (2.85 g, 20.7 mmol), followed by MeI (2.93 g, 1.28 mL, 20.7 mmol). The mixture was stirred overnight at room temperature. The reaction mixture was dissolved in EtOAc and washed with water and saturated NH<sub>4</sub>Cl. The resulting suspension was filtered through Celite and the solid was washed with EtOAc. The combined filtrate was dried over Na<sub>2</sub>SO<sub>4</sub> and concentrated under reduced pressure. The crude product was purified by silica gel column chromatography with petroleum ether/EtOAc (15:1) as eluent to give *N*-methyl-*N*-prop-2-ynyl-*p*-toluenesulfonamide (**5**, 2.88 g, 94%).

Compound **5**. White solid, mp: 71.2-72.4 °C. <sup>1</sup>H NMR (400 MHz, CDCl<sub>3</sub>) δ 7.72 (d, *J* = 8.4 Hz, 2H), 7.33 (d, *J* = 8.8 Hz, 2H), 4.03 (d, *J* = 2.8 Hz, 2H), 2.83 (s, 3H), 2.44 (s, 3H), 2.10 (t, *J* = 2.4 Hz, 1H).

*N*-allyl-4-methylbenzenesulfonamide (2.11 g, 10 mmol) was dissolved in DMF and the solution was stirred at room temperature. K<sub>2</sub>CO<sub>3</sub> (2.07 g, 15 mmol) was added to this solution, followed by MeI (2.13 g, 0.93 mL, 15 mmol). The mixture was stirred overnight at room temperature. The reaction mixture was dissolved in AcOEt and washed with water and saturated NH<sub>4</sub>Cl. The resulting suspension was filtered through Celite and the solid was washed with EtOAc. The combined filtrate was dried over Na<sub>2</sub>SO<sub>4</sub> and concentrated under reduced pressure. The crude product was purified by silica gel column chromatography with petroleum ether/EtOAc (15:1) as eluent to give *N*-allyl-*N*,4-dimethylbenzenesulfonamide (**7**, 2.0 g, 90%).

Compound **7**. White solid, mp: 75.8-76.5 °C. <sup>1</sup>H NMR (400 MHz, CDCl<sub>3</sub>) δ 7.66 (d, *J* = 8.2 Hz, 2H), 7.32 (d, *J* = 8.1 Hz, 2H), 5.74-5.62 (m, 1H), 5.17 (dd, *J* = 16.4, 5.9 Hz, 2H), 3.61 (d, *J* = 6.0 Hz, 2H), 2.65 (s, 3H), 2.42 (s, 3H).

### 4.3. Preparation of **1a-d** and Et<sub>3</sub>SiD.

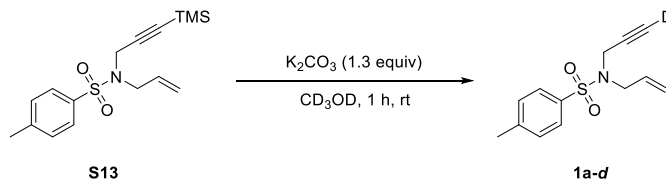

**S13** (96 mg, 0.3 mmol)<sup>[9]</sup> was added to a suspension of K<sub>2</sub>CO<sub>3</sub> (54 mg, 0.39 mmol) in CD<sub>3</sub>OD (2 mL), and then stirred at 25 °C for 1 hour under N<sub>2</sub>. The mixture was extracted with D<sub>2</sub>O and CDCl<sub>3</sub>. The combined organic phases were dried with anhydrous Na<sub>2</sub>SO<sub>4</sub> and concentrated under reduced pressure to give **1a-d** (65 mg, 86% yield, 99.8 D).<sup>[10a]</sup>

Compound **1a-d**. White solide, mp: 60.3-60.9 °C. <sup>1</sup>H NMR (400 MHz, CDCl<sub>3</sub>) δ 7.76 (d, *J* = 8.4 Hz, 1H), 7.32 (d, *J* = 8.0 Hz, 1H), 5.80-5.70 (m, 1H), 5.51-5.14 (m, 1H), 4.12 (s, 1H), 3.85 (d, *J* = 6.4 Hz, 1H), 2.45 (s, 2H). 2.02 (t, *J* = 2.4 Hz, 0.02 H).

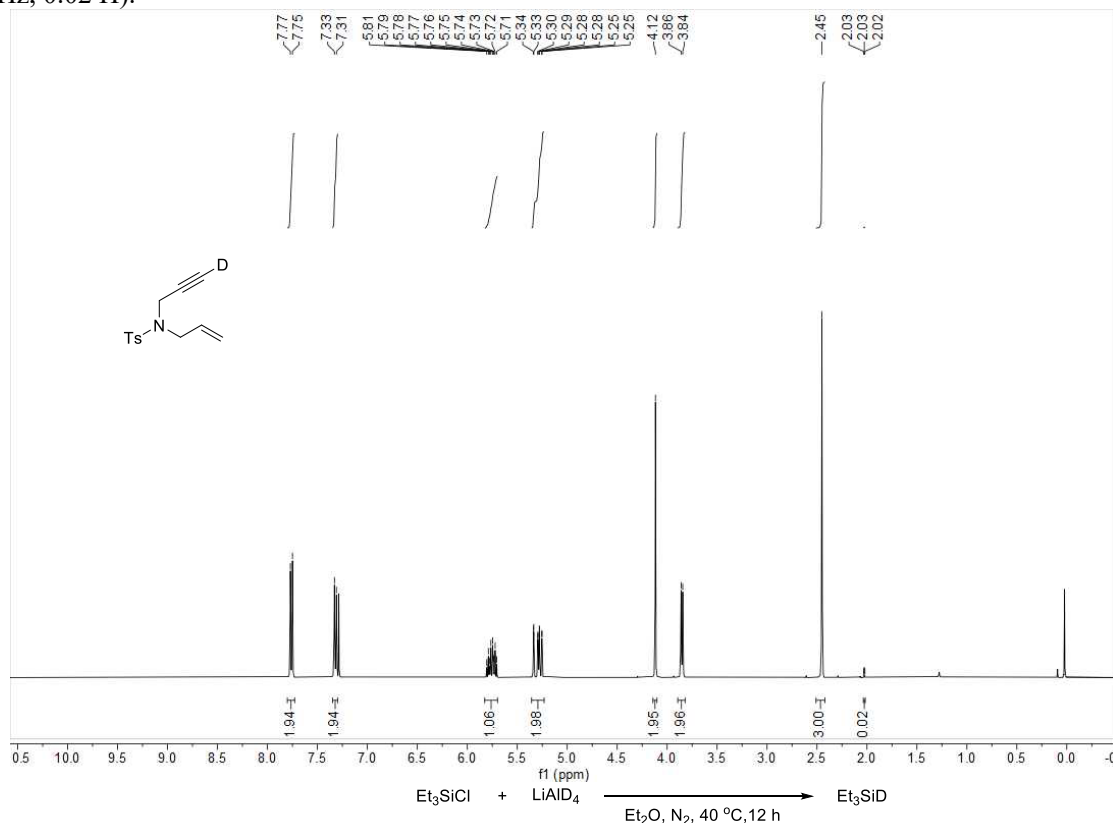

Et<sub>3</sub>SiCl (15 mmol, 3.0 equiv) was added dropwise to a stirred solution of LiAlD<sub>4</sub> (5 mmol, 1.0 equiv) in anhydrous diethyl ether (15 mL) under N<sub>2</sub> atmosphere. The reaction mixture was refluxed at 40 °C for 12 h and cooled to room temperature. The reaction was quenched by adding aqueous solution of sodium hydroxide (15 mL, 10 wt%). The mixture was extracted by diethyl ether (10 mL x 3). The combined organic layers were dried over Na<sub>2</sub>SO<sub>4</sub>, evaporated under reduced pressure, and purified by column chromatography on silica gel (petroleum ether/EtOAc (50:1)) to give Et<sub>3</sub>SiD (0.9 g, 51% yield, >99% D).<sup>[10b]</sup> Colorless oil. <sup>1</sup>H NMR (400 MHz, CDCl<sub>3</sub>) δ 0.98 (t, *J* = 8.0 Hz, 9H), 0.58 (q, *J* = 8.0 Hz, 6H).

## 5. Silylcyclization of 1,6-enynes and derivatization of the silylcyclization products.

### 5.1. General procedure for asymmetric silylcyclization of 1,6-enynes.

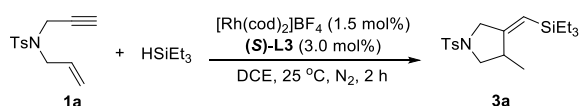

A mixture of  $[\text{Rh}(\text{cod})_2\text{BF}_4]$  (0.12 mg, 0.003 mmol) and **(S)-L3** (3.6 mg, 0.006 mmol) in dichloroethane (DCE, 1 mL) was stirred under nitrogen at 25 °C for 30 min. Triethylsilane (46.4 mg, 0.4 mmol) was added at 25 °C. After stirring for another 20 min, 1,6-enyne (**1a**, 50.0 mg, 0.2 mmol) in 1.0 mL of DCE was added and stirred at room temperature for 2.0 h. The reaction mixture was concentrated under reduced pressure. The crude product was purified by silica gel column chromatography with petroleum ether/EtOAc (20:1) as eluent to give **3a** (Colorless oil, 67 mg, 92% yield).

### 5.2. General procedure for the synthesis of racemic products.

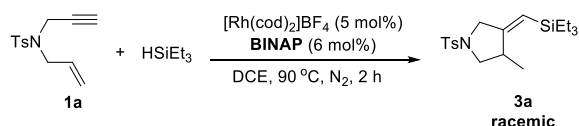

The mixture of  $[\text{Rh}(\text{cod})_2\text{BF}_4]$  (4 mg, 0.01 mmol) and **(±)-BINAP** (7.5 mg, 0.012 mmol) in dichloroethane (DCE, 1 mL) was stirred under nitrogen at 25 °C for 30 min. Triethylsilane (46.4 mg, 0.4 mmol) was added at 25 °C. After stirring for another 20 min, 1,6-enyne (**1a**, 50.0 mg, 0.2 mmol) in 1.0 mL of DCE was added and stirred at 90 °C for 2.0 h. The reaction mixture was concentrated under reduced pressure. The crude product was purified by silica gel column chromatography with petroleum ether/EtOAc (20:1) as eluent to give **(±)-3a** (Colorless oil, 44.6 mg, 62% yield).

### 5.3. General procedure for desilylation.

The enantiomeric excesses of silylcyclization products were determined by chiral HPLC of their desilylated compounds **3a'**.

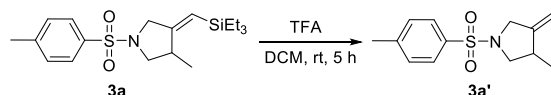

A solution of **3a** (36.5 mg, 0.1 mmol) in 0.5 mL of trifluoroacetic acid and 2 mL of  $\text{CH}_2\text{Cl}_2$  was stirred at room temperature for 5 h, and then quenched with saturated aqueous sodium carbonate. After extraction with  $\text{CH}_2\text{Cl}_2$ , the organic layer was washed with water and brine, dried over  $\text{Na}_2\text{SO}_4$  and evaporated under vacuum. The residue was purified by column chromatography on silica gel eluting with petroleum ether/EtOAc (6:1) to give the desilylated compound **3a'** (33.2 mg, 91% yield).

### 5.4. Coupling of **3aa** with iodobenzene. <sup>[4,11]</sup>

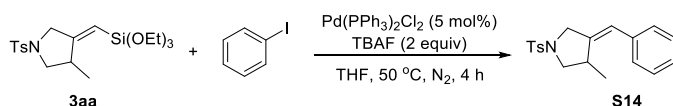

Under a nitrogen atmosphere, the solution of **3aa** (60 mg, 0.15 mmol), tetrabutylammonium fluoride hydrate (95 mg, 0.3 mmol) and iodobenzene (41.0 mg, 0.2 mmol) in 0.5 mL THF was stirred at room temperature for 15 min.  $\text{Pd}(\text{PPh}_3)_2\text{Cl}_2$  (5.3 mg, 5 mol%) was added, and the resulting mixture was heated at 40 °C for 4 h. The filtrate was concentrated under reduced pressure and the residue was purified by column chromatography on silica gel eluting with petroleum ether/EtOAc (10:1) to give the compound **S14** (44 mg, 90% yield, 93% ee).

Compound **S14**. Colorless oil.  $[\alpha]_{\text{D}}^{25} = 45.57$  ( $c = 0.5$ ,  $\text{CH}_2\text{Cl}_2$ ).  $^1\text{H NMR}$  (400 MHz,  $\text{CDCl}_3$ )  $\delta$  7.76 (d,  $J = 8.0$  Hz, 2H), 7.37 (d,  $J = 8.0$  Hz, 2H), 7.32 (d,  $J = 7.6$  Hz, 2H), 7.24-7.21 (m, 3H), 6.27 (q,  $J = 2.0$  Hz, 1H), 4.18 (dt,  $J = 14.0$ , 1.6 Hz, 1H), 3.81 (dd,  $J = 14.0$ , 1.6 Hz, 1H), 3.36-3.12 (m, 3H), 2.46 (s, 3H), 1.15 (d,  $J = 7.2$  Hz, 3H).  $^{13}\text{C NMR}$  (100 MHz,  $\text{CDCl}_3$ )  $\delta$  143.7, 141.9, 136.4, 132.6, 129.7, 128.5, 128.0, 127.8, 127.0, 122.4, 55.7, 53.0, 35.1, 21.5, 18.5. The ee value of product **S14** was determined by HPLC using Daicel Chiralcel OD-H column (25 cm  $\times$  0.46 cm ID), conditions:  $n$ -hexane/ $i$ -PrOH = 90:10, 1.0 mL/min, 254 nm;  $t_R = 11.53$  min (minor) and 13.97 min (major).



## 6. Preparation {PdCl<sub>2</sub>[(S)-L3]} (S15).

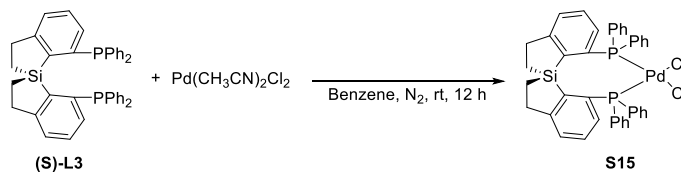

A solution of **(S)-Si-SDP (L3)** (60.4 mg, 0.1 mmol) in 1.0 mL of benzene was added to a mixture of Pd(CH<sub>3</sub>CN)<sub>2</sub>Cl<sub>2</sub> (25.7 mg, 0.1 mmol) in 2.0 mL of benzene at room temperature, and the mixture was stirred overnight. The pale-yellow precipitate formed was collected by filtration, washed with benzene, dried under vacuum to provide **S15** as a yellow solid (70.2 mg, 90% yield).

Yellow solid. mp: 270 °C dec. <sup>1</sup>H NMR (400 MHz, CDCl<sub>3</sub>) δ 7.92-7.92 (m, 3H), 7.55-7.50 (m, 3H), 7.46-7.35 (m, 10H), 7.28-7.18 (m, 4H), 7.11-7.04 (dt, *J* = 15.5, 8.0 Hz, 6H), 2.85-2.59 (m, 4H), 0.58 (q, *J* = 7.2 Hz, 2H), -0.06--0.27 (m, 2H). <sup>13</sup>C NMR (100 MHz, CDCl<sub>3</sub>) δ 155.3 (d, *J* = 13.3 Hz), 139.4 (d, *J* = 21.1 Hz), 135.60, 133.6 (d, *J* = 61.6 Hz), 133.5 (d, *J* = 11.0 Hz), 132.8 (d, *J* = 9.9 Hz), 131.0 (d, *J* = 2.8 Hz), 130.1 (d, *J* = 10.2 Hz), 130.1 (d, *J* = 2.8 Hz), 128.9 (d, *J* = 2.1 Hz), 128.8 (d, *J* = 3.2 Hz), 128.6 (d, *J* = 10.8 Hz), 128.3 (d, *J* = 3.2 Hz), 128.2 (d, *J* = 11.7 Hz), 30.78, 9.53. <sup>31</sup>P NMR (CDCl<sub>3</sub>): δ 37.24. HRMS (ESI) *m/z* calcd for C<sub>40</sub>H<sub>32</sub>ClP<sub>2</sub>PdSi, [M]<sup>+</sup> = 735.0234, found: 735.0232.

## 7. Characterization of Rh-L3.

Inside an argon-filled glovebox, an oven-dried 5 mL vial was charged with  $[\text{Rh}(\text{cod})\text{BF}_4]_2$  (8 mg, 0.025 mmol), (*S*)-**(L3)** (18 mg, 0.03 mmol) and 1 mL DCE. The mixture was stirred at room temperature for 30 min and analyzed with NMR.

### $^{31}\text{P}$ NMR

1) (*S*)-Si-SDP (**L3**) (12 mg, 0.02 mmol) in 1 mL  $\text{CDCl}_3$ .  $^{31}\text{P}$  NMR (161 MHz,  $\text{CDCl}_3$ ):  $\delta$  -6.57

2)  $[\text{Rh}(\text{cod})\text{BF}_4]_2$  (8 mg, 0.025 mmol), (*S*)-Si-SDP (**L3**) (18 mg, 0.03 mmol) and 1 mL  $\text{CDCl}_3$ . The mixture was stirred at room temperature for 30 min.  $^{31}\text{P}$  NMR (161 MHz,  $\text{CDCl}_3$ ):  $\delta$  30.68 (d,  $J = 140.07$  Hz).

1)

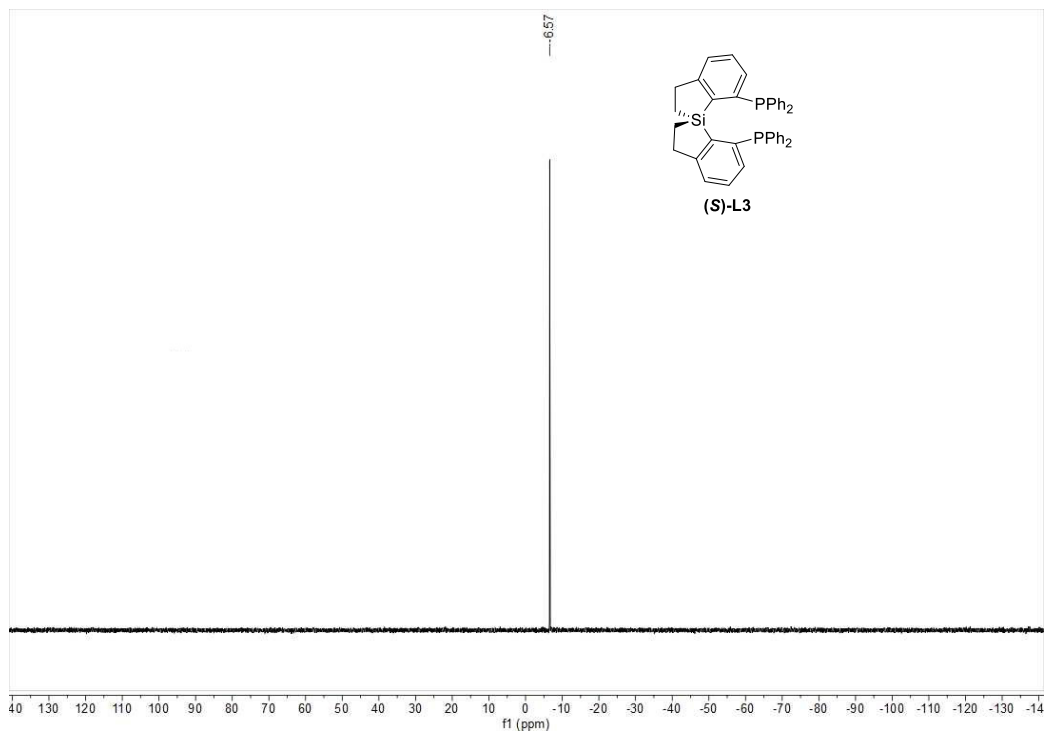

2)

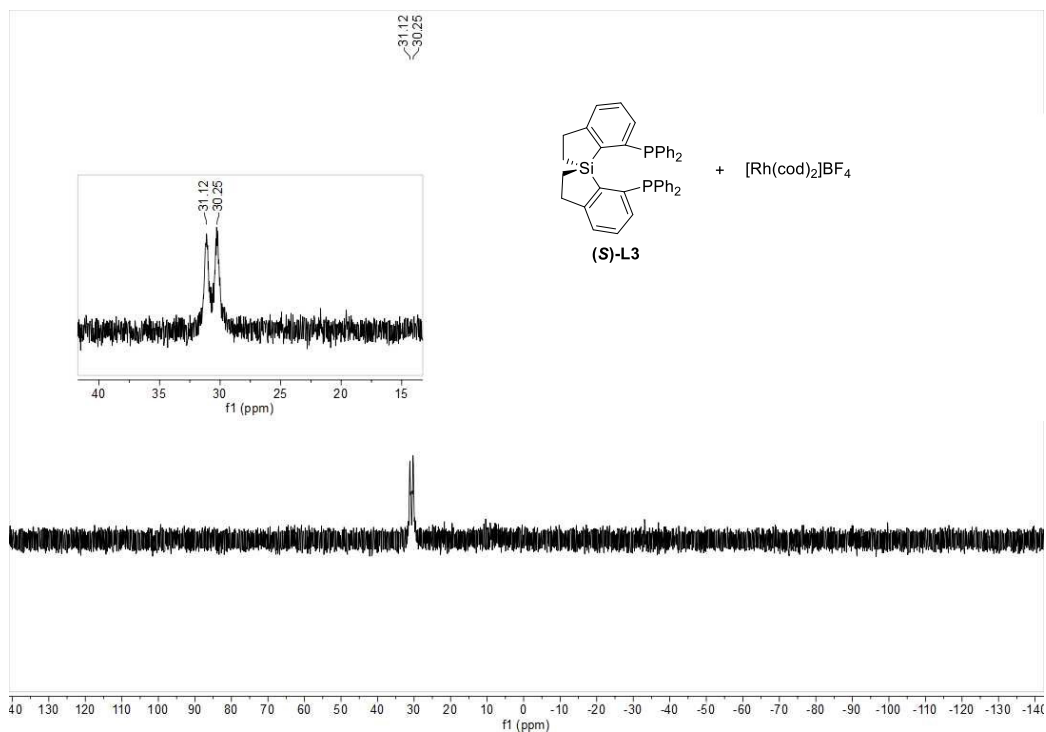

## 8. Characterization data.

### 8.1. Characterization Data of Deuterated compounds.

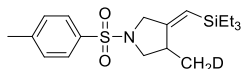

**(E)-1-tosyl-3-((triethylsilyl)methylene)pyrrolidine-4-d (3a-d-2).** Colorless oil, 73% yield.  $^1\text{H}$  NMR (400 MHz,  $\text{CDCl}_3$ )  $\delta$  7.72 (d,  $J = 8.4$  Hz, 2H), 7.34 (d,  $J = 8.0$  Hz, 2H), 5.25 (q,  $J = 2.4$  Hz), 4.09-4.05 (m, 1H), 3.59 (dd,  $J = 14.0$ , 2.0 Hz, 1H), 3.26 (dd,  $J = 9.6$ , 1.2 Hz, 1H), 3.15 (dd,  $J = 9.2$ , 6.0 Hz, 1H), 2.72-2.67 (m, 1H), 2.43 (s, 3H), 1.04 (dt,  $J = 6.8$ , 2.0 Hz, 2H), 0.89 (t,  $J = 8.0$  Hz, 9H), 0.56 (q,  $J = 8.0$  Hz, 6H).  $^{13}\text{C}$  NMR (100 MHz,  $\text{CDCl}_3$ )  $\delta$  158.2, 143.5, 133.0, 129.65, 127.7, 117.8, 55.5, 53.7, 37.7, 21.5, 20.6 (t,  $J = 19.5$  Hz), 7.4, 4.2. HRMS (ESI)  $m/z$  calcd for  $\text{C}_{19}\text{H}_{31}\text{DNO}_2\text{SSi}$ ,  $[\text{M} + \text{H}]^+ = 367.1980$ , found: 367.1990.

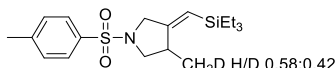

**(E)-1-tosyl-3-((triethylsilyl)methylene)pyrrolidine-4-d (3a-d-3).** Colorless oil, 70% yield.  $^1\text{H}$  NMR (400 MHz,  $\text{CDCl}_3$ )  $\delta$  7.72 (d,  $J = 8.4$  Hz, 2H), 7.34 (d,  $J = 8.0$  Hz, 2H), 5.26 (q,  $J = 2.0$  Hz, 1H), 4.07 (dt,  $J = 14.0$ , 1.6 Hz, 1H), 3.60 (dd,  $J = 14.0$ , 2.0 Hz, 1H), 3.27 (dd,  $J = 9.2$ , 1.2 Hz, 1H), 3.15 (dd,  $J = 9.2$ , 5.6 Hz, 1H), 2.76-2.65 (m, 1H), 2.44 (s, 3H), 1.05 (m, 2.58 H), 0.90 (t,  $J = 8.0$  Hz, 9H), 0.57 (q,  $J = 8.0$  Hz, 6H).  $^{13}\text{C}$  NMR (100 MHz,  $\text{CDCl}_3$ )  $\delta$  158.2, 143.5, 133.0, 129.6, 127.7, 117.8, 55.5, 53.7, 37.8, 21.5, 20.9, 20.6 (t,  $J = 19.0$  Hz), 7.4, 4.2. HRMS (ESI)  $m/z$  calcd for  $\text{C}_{19}\text{H}_{31}\text{DNO}_2\text{SSi}$ ,  $[\text{M} + \text{H}]^+ = 367.1980$ , found: 367.1985.

### 8.2. Characterization Data of 1,6-enynes.

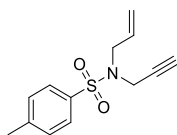

**N-allyl-4-methyl-N-(prop-2-yn-1-yl)benzenesulfonamide (1a).**<sup>[3]</sup> White solid. 88% yield. m.p: 59.1-60.6 °C.  $^1\text{H}$  NMR (400 MHz,  $\text{CDCl}_3$ )  $\delta$  7.78-7.72 (m, 2H), 7.31 (d,  $J = 8.0$  Hz, 2H), 5.69-5.80 (m, 1H), 5.36-5.23 (m, 2H), 4.11 (d,  $J = 2.4$  Hz, 2H), 3.84 (dt,  $J = 6.4$  Hz, 2H), 2.44 (s, 3H), 2.02 (t,  $J = 2.4$  Hz, 1H).

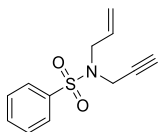

**N-allyl-N-(prop-2-yn-1-yl)benzenesulfonamide (1b).**<sup>[3]</sup> Colorless oil, 90% yield.  $^1\text{H}$  NMR (400 MHz,  $\text{CDCl}_3$ )  $\delta$  7.83-7.78 (m, 2H), 7.54-7.50 (m, 1H), 7.47-7.43 (m, 2H), 5.71-5.61 (m, 1H), 5.29-5.15 (m, 2H), 4.04 (d,  $J = 2.4$  Hz, 2H), 3.80 (d,  $J = 6.4$ , 2H), 2.00 (t,  $J = 2.4$  Hz, 1H).

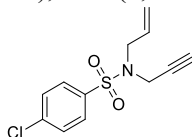

**N-allyl-4-chloro-N-(prop-2-yn-1-yl)benzenesulfonamide (1c).** White solid. 90% yield. m.p: 71.1-72.4 °C.  $^1\text{H}$  NMR (400 MHz,  $\text{CDCl}_3$ )  $\delta$  7.81 (d,  $J = 8.0$  Hz, 2H), 7.50 (d,  $J = 8.0$  Hz, 2H), 5.80-5.70 (m, 1H), 5.36-5.25 (m, 2H), 4.12 (d,  $J = 2.4$  Hz, 2H), 3.84 (d,  $J = 4.0$  Hz, 2H), 2.05 (t,  $J = 2.4$  Hz, 1H).  $^{13}\text{C}$  NMR (100 MHz,  $\text{CDCl}_3$ )  $\delta$  139.3, 137.5, 131.5, 129.2, 129.1, 120.3, 76.1, 74.0, 49.0, 35.7. HRMS (ESI)  $m/z$  calcd for  $\text{C}_{12}\text{H}_{13}\text{ClNO}_2\text{S}$ ,  $[\text{M} + \text{H}]^+ = 270.0350$ , found: 270.0355.

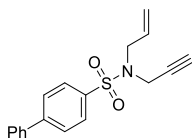

***N*-allyl-*N*-(prop-2-yn-1-yl)-[1,1'-biphenyl]-4-sulfonamide (1d).** White solid. 83% yield. m.p: 77.0-78.0 °C. <sup>1</sup>H NMR (400 MHz, CDCl<sub>3</sub>) δ 7.94 (d, *J* = 8.5 Hz, 2H), 7.74 (d, *J* = 8.5 Hz, 2H), 7.65 (dd, *J* = 7.0, 1.6 Hz, 2H), 7.54-7.48 (m, 2H), 7.47-7.42 (m, 1H), 5.79 (m, 1H), 5.38-5.27 (m, 2H), 4.16 (d, *J* = 2.5 Hz, 2H), 3.91 (d, *J* = 6.5 Hz, 2H), 2.03 (t, *J* = 2.4 Hz, 1H). <sup>13</sup>C NMR (100 MHz, CDCl<sub>3</sub>) δ 145.6, 139.2, 137.4, 131.8, 129.1, 128.5, 128.3, 127.5, 127.3, 120.2, 76.4, 73.9, 49.1, 35.8. HRMS (ESI) *m/z* calcd for C<sub>18</sub>H<sub>18</sub>NO<sub>2</sub>S, [M + H]<sup>+</sup> = 312.1053, found: 312.1049.

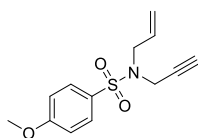

***N*-allyl-4-methoxy-*N*-(prop-2-yn-1-yl)benzenesulfonamide (1e).**<sup>[5]</sup> White solid. 78% yield. m.p: 100.2-101.5 °C. <sup>1</sup>H NMR (400 MHz, CDCl<sub>3</sub>) δ 7.80 (d, *J* = 8.9 Hz, 2H), 6.98 (d, *J* = 9.0 Hz, 2H), 5.80-5.70 (m, 1H), 5.36-5.20 (m, 2H), 4.10 (d, *J* = 2.8 Hz, 1H), 3.88 (s, 3H), 3.83 (d, *J* = 6.4 Hz, 2H), 2.03 (t, *J* = 2.4 Hz, 1H).

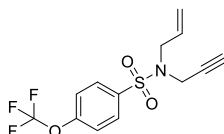

***N*-allyl-*N*-(prop-2-yn-1-yl)-4-(trifluoromethoxy)benzenesulfonamide (1f).** Light yellow liquid, 60% yield. <sup>1</sup>H NMR (400 MHz, CDCl<sub>3</sub>) δ 7.92 (d, *J* = 8.8 Hz, 2H), 7.35 (d, *J* = 7.8 Hz, 2H), 5.82-5.70 (m, 1H), 5.35-5.26 (m, 2H), 4.12 (d, *J* = 2.4 Hz, 2H), 3.86 (d, *J* = 6.4 Hz, 2H), 1.99 (t, *J* = 2.4 Hz, 1H). <sup>13</sup>C NMR (100 MHz, CDCl<sub>3</sub>) δ 152.2, 137.3, 131.4, 129.9, 120.8, 120.4, 120.2 (q, *J* = 258.2 Hz), 75.9, 74.0, 49.0, 35.7. <sup>19</sup>F NMR (376 MHz, CDCl<sub>3</sub>) δ -57.57. HRMS (ESI) *m/z* calcd for C<sub>13</sub>H<sub>12</sub>F<sub>3</sub>NO<sub>3</sub>S, [M + H]<sup>+</sup> = 320.0563, found: 320.0570.

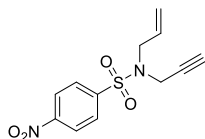

***N*-allyl-4-nitro-*N*-(prop-2-yn-1-yl)benzenesulfonamide (1g)**<sup>[4]</sup>. White solid. 83% yield. m.p: 100.2-101.5 °C. <sup>1</sup>H NMR (400 MHz, CDCl<sub>3</sub>) δ 8.37 (d, *J* = 8.8 Hz, 2H), 8.07 (d, *J* = 8.8 Hz, 2H), 5.82-5.72 (m, 1H), 5.38-5.30 (m, 2H), 4.18 (d, *J* = 2.4 Hz, 2H), 3.87 (d, *J* = 6.0, 2H), 2.04 (d, *J* = 2.5, 1H).

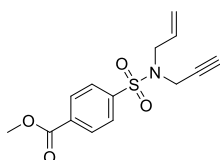

**Methyl 4-(*N*-allyl-*N*-(prop-2-yn-1-yl)sulfamoyl)benzoate (1h).** White solid. 88% yield. m.p: 87.3-88.5 °C. <sup>1</sup>H NMR (400 MHz, CDCl<sub>3</sub>) δ 8.17 (d, *J* = 8.4 Hz, 2H), 7.93 (d, *J* = 8.4 Hz, 2H), 5.78-5.68 (m, 1H), 5.35-5.24 (m, 2H), 4.13 (d, *J* = 2.4 Hz, 2H), 3.97 (s, 3H), 3.86 (d, *J* = 6.4 Hz, 2H), 1.98 (t, *J* = 2.4 Hz, 1H). <sup>13</sup>C NMR (100 MHz, CDCl<sub>3</sub>) δ 165.7, 142.9, 133.9, 131.4, 130.1, 127.7, 120.4, 75.9, 74.1, 52.6, 49.0, 35.8. HRMS (ESI) *m/z* calcd for C<sub>14</sub>H<sub>16</sub>NO<sub>4</sub>S, [M + H]<sup>+</sup> = 294.0795, found: 294.0788.

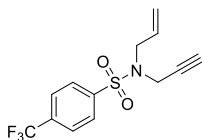

***N*-allyl-*N*-(prop-2-yn-1-yl)-4-(trifluoromethyl)benzenesulfonamide (1i).**<sup>[5]</sup> Colorless oil, 90% yield. <sup>1</sup>H NMR (400 MHz, CDCl<sub>3</sub>) δ 8.00 (d, *J* = 8.4 Hz, 1H), 7.79 (d, *J* = 8.4 Hz, 1H), 5.79-5.69 (m, 1H), 5.39-5.21 (m, 1H), 4.14 (d, *J* = 2.8 Hz, 1H), 3.87 (d, *J* = 6.4 Hz, 1H), 2.01 (t, *J* = 2.4 Hz, 1H).

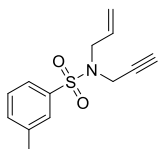

***N*-allyl-3-methyl-*N*-(prop-2-yn-1-yl)benzenesulfonamide (1j).** Light yellow liquid, 65% yield. <sup>1</sup>H NMR (400 MHz, CDCl<sub>3</sub>) δ 7.68-7.61 (m, 2H), 7.38 (d, *J* = 4.8 Hz, 2H), 5.72 (m, 1H), 5.33-5.21 (m, 2H), 4.10 (d, *J* = 2.4 Hz, 2H), 3.83 (d, *J* = 6.4 Hz, 2H), 2.41 (s, 3H), 2.02 (t, *J* = 2.4 Hz, 1H). <sup>13</sup>C NMR (100 MHz, CDCl<sub>3</sub>) δ 139.0, 138.6, 133.6, 131.8, 128.7, 128.0, 124.8, 120.0, 76.3, 73.7, 49.0, 35.8, 21.3. HRMS (ESI) *m/z* calcd for C<sub>13</sub>H<sub>16</sub>NO<sub>2</sub>S, [M + H]<sup>+</sup> = 250.0896, found: 250.0892.

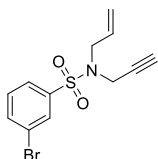

***N*-allyl-3-bromo-*N*-(prop-2-yn-1-yl)benzenesulfonamide (1k).** Light yellow liquid, 70% yield. <sup>1</sup>H NMR (400 MHz, CDCl<sub>3</sub>) δ 8.01 (q, *J* = 1.6 Hz, 1H), 7.80-7.77 (m, 1H), 7.72-7.69 (m, 1H), 7.40 (t, *J* = 7.9 Hz, 1H), 5.79-5.58 (m, 1H), 5.34-5.26 (m, 2H), 4.12 (d, *J* = 2.0 Hz, 2H), 3.83 (dd, *J* = 6.8, 1.6 Hz, 2H), 2.07 (t, *J* = 2.4 Hz, 1H). <sup>13</sup>C NMR (100 MHz, CDCl<sub>3</sub>) δ 140.6, 135.8, 131.43, 130.6, 130.4, 126.2, 122.8, 120.4, 76.0, 74.2, 49.1, 35.8. HRMS (ESI) *m/z* calcd for C<sub>12</sub>H<sub>12</sub>BrNaNO<sub>2</sub>S, [M + H]<sup>+</sup> = 335.9664, found: 335.9669.

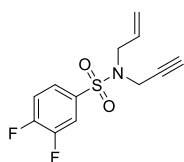

***N*-allyl-3,4-difluoro-*N*-(prop-2-yn-1-yl)benzenesulfonamide (1l).** White solid. 88% yield. m.p: 73.6-74.3 °C. <sup>1</sup>H NMR (400 MHz, CDCl<sub>3</sub>) δ 7.69-7.45 (m, 1H), 7.67-7.63 (m, 1H), 7.35-7.28 (m, 1H), 5.80-5.69 (m, 1H), 5.35-5.27 (m, 2H), 4.11 (d, *J* = 2.4 Hz, 2H), 3.83 (dd, *J* = 6.4, 2.0 Hz, 2H), 2.07 (t, *J* = 2.5 Hz, 1H). <sup>13</sup>C NMR (100 MHz, CDCl<sub>3</sub>) δ 153.2 (dd, *J* = 255.4, 12.6 Hz), 149.9 (dd, *J* = 252.4, 13.4 Hz), 135.7 (t, 4.5 Hz), 131.3, 124.9 (q, *J* = 4.0 Hz), 120.5, 117.9 (d, *J* = 18.3 Hz), 117.6 (dd, *J* = 19.8, 1.9 Hz), 75.9, 74.2, 49.1, 35.8. <sup>19</sup>F NMR (376 MHz, CDCl<sub>3</sub>) δ -129.52 (d, *J* = 18.8 Hz), -134.14 (d, *J* = 22.56 Hz). HRMS (ESI) *m/z* calcd for C<sub>12</sub>H<sub>12</sub>F<sub>2</sub>NO<sub>2</sub>S, [M + H]<sup>+</sup> = 272.0551, found: 272.0555.

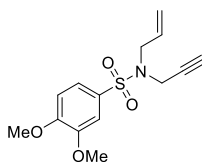

***N*-allyl-3,4-dimethoxy-*N*-(prop-2-yn-1-yl)benzenesulfonamide (1m).** Light yellow liquid, 90% yield. <sup>1</sup>H NMR (400 MHz, CDCl<sub>3</sub>) δ 7.47 (dd, *J* = 8.4, 2.4 Hz, 1H), 7.31 (d, *J* = 2.0 Hz, 1H), 6.93 (d, *J* = 8.8 Hz, 1H), 5.78-5.68 (m, 1H), 5.33-5.22 (m, 2H), 4.11 (d, *J* = 2.4 Hz, 2H), 3.94 (s, 3H), 3.93 (s, 3H), 3.81 (d, *J* = 6.4 Hz, 2H), 2.05 (t, *J* = 2.4 Hz,

1H). <sup>13</sup>C NMR (100 MHz, CDCl<sub>3</sub>) δ 152.6, 148.8, 131.8, 130.5, 121.7, 120.0, 110.3, 110.2, 77.2, 73.7, 56.2, 56.1, 48.9, 35.7. HRMS (ESI) *m/z* calcd for C<sub>14</sub>H<sub>18</sub>NO<sub>4</sub>S, [M + H]<sup>+</sup> = 296.0951, found: 296.0954.

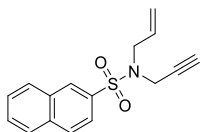

***N*-allyl-*N*-(prop-2-yn-1-yl)naphthalene-2-sulfonamide (1n).**<sup>[6]</sup> White solid. 85% yield. m.p: 89.6-91.1 °C. <sup>1</sup>H NMR (400 MHz, CDCl<sub>3</sub>) δ 8.46 (d, *J* = 1.9 Hz, 1H), 8.02-7.95 (m, 2H), 7.94-7.91 (m, 1H), 7.86 (dd, *J* = 8.8, 2.0 Hz, 1H), 7.68-7.60 (m, 2H), 5.82-5.72 (m, 1H), 5.35-5.24 (m, 2H), 4.18 (d, *J* = 2.4 Hz, 2H), 3.92 (d, *J* = 6.4 Hz, 2H), 1.93 (t, *J* = 2.4 Hz, 1H).

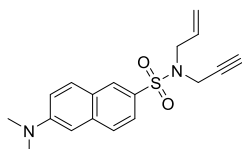

***N*-allyl-6-(dimethylamino)-*N*-(prop-2-yn-1-yl)naphthalene-2-sulfonamide (1o).** Fluorescent green oil, 87% yield. <sup>1</sup>H NMR (400 MHz, CDCl<sub>3</sub>) δ 8.57 (dt, *J* = 8.4, 1.2 Hz, 1H), 8.32 (dt, *J* = 8.8, 1.2 Hz, 1H), 8.27 (dd, *J* = 7.6, 1.6 Hz, 1H), 7.59-7.51 (m, 2H), 7.20 (dd, *J* = 7.6, 1.2 Hz, 1H), 5.74-5.64 (m, 1H), 5.32-5.20 (m, 2H), 4.15 (d, *J* = 2.4 Hz, 2H), 4.00 (d, *J* = 6.4 Hz, 2H), 2.89 (s, 6H), 2.09 (t, *J* = 2.4 Hz, 1H). <sup>13</sup>C NMR (100 MHz, CDCl<sub>3</sub>) δ 151.7, 134.4, 131.9, 130.6, 130.1, 130.0, 128.1, 123.1, 120.1, 119.5, 115.2, 77.1, 73.3, 48.8, 45.4, 35.2. HRMS (ESI) *m/z* calcd for C<sub>18</sub>H<sub>21</sub>N<sub>2</sub>O<sub>2</sub>S, [M + H]<sup>+</sup> = 329.1318, found: 329.1320.

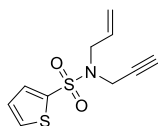

***N*-allyl-*N*-(prop-2-yn-1-yl)thiophene-2-sulfonamide (1p).**<sup>[7]</sup> Light yellow liquid, 73% yield. <sup>1</sup>H NMR (400 MHz, CDCl<sub>3</sub>) δ 7.63 (dd, *J* = 8.4, 3.6 Hz, 2H), 7.12 (t, *J* = 4.4 Hz, 1H), 5.92-5.73 (m, 1H), 5.40-5.25 (m, 3H), 4.13 (d, *J* = 2.4 Hz, 2H), 3.92 (d, *J* = 6.4 Hz, 2H), 2.06 (t, *J* = 2.4 Hz, 1H).

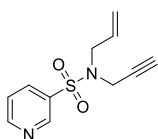

***N*-allyl-*N*-(prop-2-yn-1-yl)pyridine-3-sulfonamide (1q).** Hydrazone black solid, 70% yield, m.p: 54.3-55.6 °C. <sup>1</sup>H NMR (400 MHz, CDCl<sub>3</sub>) δ 9.08 (d, *J* = 2.4 Hz, 1H), 8.82 (dd, *J* = 4.8, 2.4 Hz, 1H), 8.16 (dt, *J* = 8.0, 2.0 Hz, 1H), 7.50-7.47 (m, 1H), 5.81-5.71 (m, 1H), 5.37-5.27 (m, 2H), 4.15 (d, *J* = 2.4 Hz, 2H), 3.87 (d, *J* = 6.4 Hz, 2H), 2.05 (t, *J* = 2.4 Hz, 1H). <sup>13</sup>C NMR (100 MHz, CDCl<sub>3</sub>) δ 153.3, 148.4, 135.5, 135.4, 131.2, 123.5, 120.5, 75.9, 74.4, 49.0, 35.8. HRMS (ESI) *m/z* calcd for C<sub>11</sub>H<sub>13</sub>N<sub>2</sub>O<sub>2</sub>S, [M + H]<sup>+</sup> = 237.0692, found: 237.0696.

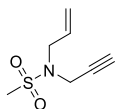

***N*-allyl-*N*-(prop-2-yn-1-yl)methanesulfonamide (1r).**<sup>[3]</sup> Light yellow liquid, 66% yield. <sup>1</sup>H NMR (400 MHz, CDCl<sub>3</sub>) δ 5.85-5.75 (m, 1H), 5.41-5.27 (m, 2H), 4.06 (d, *J* = 2.4 Hz, 2H), 3.89 (d, *J* = 6.4 Hz, 2H), 2.95 (s, 3H), 2.39 (t, *J* = 2.4 Hz, 1H).

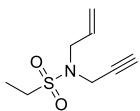

***N*-allyl-*N*-(prop-2-yn-1-yl)ethanesulfonamide (1s).** Colorless oil, 55% yield.  $^1\text{H}$  NMR (400 MHz,  $\text{CDCl}_3$ )  $\delta$  5.81-5.70 (m, 1H), 5.35-5.24 (m, 2H), 4.02 (d,  $J = 3.6$  Hz, 2H), 3.92 (dd,  $J = 8.8, 3.2$  Hz, 4H), 3.08 (q,  $J = 3.2$  Hz, 2H), 2.36 (t,  $J = 2.4$  Hz, 1H), 1.36 (t, 7.2 Hz, 3H).  $^{13}\text{C}$  NMR (100 MHz,  $\text{CDCl}_3$ )  $\delta$  132.2, 119.8, 77.6, 73.8, 49.3, 46.5, 35.4, 7.7. HRMS (ESI)  $m/z$  calcd for  $\text{C}_8\text{H}_{14}\text{NO}_2\text{S}$ ,  $[\text{M} + \text{H}]^+ = 188.0740$ , found:188.0744.

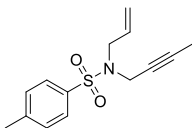

***N*-allyl-*N*-(but-2-yn-1-yl)-4-methylbenzenesulfonamide (1t).**  $^{[3]}$  Colorless oil, 95% yield.  $^1\text{H}$  NMR (400 MHz,  $\text{CDCl}_3$ )  $\delta$  7.70 (d,  $J = 8.2$  Hz, 2H), 7.27 (d,  $J = 8.2$  Hz, 2H), 5.75-5.65 (m, 1H), 5.29-5.13 (m, 2H), 4.05-3.94 (m, 2H), 3.77 (q,  $J = 6.0$  Hz, 2H), 2.39 (s, 3H), 1.50 (s, 3H).

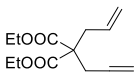

**diethyl 2-allyl-2-(prop-2-yn-1-yl)malonate (1u).** Colorless oil, 75% yield.  $^1\text{H}$  NMR (400 MHz,  $\text{CDCl}_3$ )  $\delta$  5.64-5.53 (m, 1H), 5.17-5.05 (m, 2H), 4.16 (q,  $J = 7.2$  Hz, 4H), 2.80-2.70 (m, 4H), 1.98 (t,  $J = 2.8$  Hz, 1H), 1.21 (t,  $J = 7.2$  Hz, 6H).  $^{13}\text{C}$  NMR (100 MHz,  $\text{CDCl}_3$ )  $\delta$  169.5, 131.7, 119.7, 71.3, 61.5, 56.5, 36.2, 22.4. HRMS (ESI)  $m/z$  calcd for  $\text{C}_{13}\text{H}_{19}\text{O}_4$ ,  $[\text{M} + \text{H}]^+ = 239.1278$ , found:239.1277.

### 8.3. Characterization data of the silylcyclization products (3) and hydrosilylation product (4).

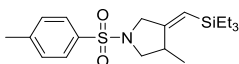

**(*E*)-3-methyl-1-tosyl-4-((triethylsilyl)methylene)pyrrolidine (3a).** Colorless oil, 92% yield.  $[\alpha]_{\text{D}}^{25} = 20.8$  ( $c = 0.5$ ,  $\text{CH}_2\text{Cl}_2$ ).  $^1\text{H}$  NMR (400 MHz,  $\text{CDCl}_3$ )  $\delta$  7.71 (d,  $J = 8.0$  Hz, 2H), 7.33 (d,  $J = 8.0$  Hz, 2H), 5.25 (q,  $J = 1.6$  Hz, 1H), 4.07 (dt,  $J = 14.0, 1.6$  Hz, 1H), 3.59 (dd,  $J = 14.0, 2$  Hz, 1H), 3.26 (d,  $J = 9.2$  Hz, 1H), 3.15 (dd,  $J = 9.6, 6.0$  Hz, 1H), 3.43 (s, 3H), 2.73-2.66 (m, 1H), 1.05 (d,  $J = 7.2$  Hz, 3H), 0.89 (t,  $J = 8.0$  Hz, 9H), 0.57 (q,  $J = 8.0$  Hz, 6H).  $^{13}\text{C}$  NMR (100 MHz,  $\text{CDCl}_3$ )  $\delta$  158.2, 143.4, 133.1, 129.6, 127.7, 117.8, 55.5, 53.7, 37.8, 21.5, 20.8, 7.4, 4.2. HRMS (ESI)  $m/z$  calcd for  $\text{C}_{19}\text{H}_{32}\text{NO}_2\text{SSi}$ ,  $[\text{M} + \text{H}]^+ = 366.1918$ , found:366.1911.

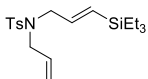

**(*E*)-*N*-allyl-4-methyl-*N*-(3-(triethylsilyl)allyl)benzenesulfonamide (4a).** Colorless oil.  $^1\text{H}$  NMR (400 MHz,  $\text{CDCl}_3$ )  $\delta$  7.73 (d,  $J = 8.4$  Hz, 2H), 7.31 (d,  $J = 8.0$  Hz, 2H), 5.78-5.57 (m, 3H), 5.18-5.10 (m, 2H), 3.87 (d,  $J = 4.4$  Hz, 2H), 3.81 (dd,  $J = 6.4, 1.6$  Hz, 2H), 2.45 (s, 3H), 0.89 (t,  $J = 7.9$  Hz, 9H), 0.51 (q,  $J = 8.0$  Hz, 6H).  $^{13}\text{C}$  NMR (100 MHz,  $\text{CDCl}_3$ )  $\delta$  143.2, 140.9, 137.6, 132.7, 131.5, 129.6, 127.1, 118.8, 51.8, 49.4, 21.4, 7.2, 3.2. HRMS (ESI)  $m/z$  calcd for  $\text{C}_{19}\text{H}_{32}\text{NO}_2\text{SSi}$ ,  $[\text{M} + \text{H}]^+ = 366.1918$ , found: 366.1926.

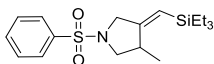

**(*E*)-3-methyl-1-(phenylsulfonyl)-4-((triethylsilyl)methylene)pyrrolidine (3b).** Colorless oil, 85% yield.  $[\alpha]_{\text{D}}^{25} = 19.4$  ( $c = 0.5$ ,  $\text{CH}_2\text{Cl}_2$ ).  $^1\text{H}$  NMR (400 MHz,  $\text{CDCl}_3$ )  $\delta$  7.84 (d,  $J = 8.8$  Hz, 2H), 7.64-7.59 (m, 1H), 7.55 (t,  $J = 7.6$  Hz, 2H), 5.26 (s, 1H), 4.09 (d,  $J = 14.0$  Hz, 1H), 3.62 (d,  $J = 14.4$  Hz, 1H), 3.29 (d,  $J = 9.2$  Hz, 1H), 3.18 (dd,  $J = 8, 5.2$

Hz, 1H), 2.74-2.67 (m, 1H), 1.04 (d,  $J = 7.2$  Hz, 3H), 0.89 (t,  $J = 8.0$  Hz, 9H), 0.57 (q,  $J = 8.0$  Hz, 6H).  $^{13}\text{C}$  NMR (100 MHz,  $\text{CDCl}_3$ )  $\delta$  158.0, 136.1, 132.7, 129.0, 127.6, 118.0, 55.5, 53.6, 37.8, 20.8, 7.4, 4.2. HRMS (ESI)  $m/z$  calcd for  $\text{C}_{18}\text{H}_{30}\text{NO}_2\text{SSi}$ ,  $[\text{M} + \text{H}]^+ = 352.1761$ , found:352.1766.

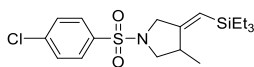

**(E)-1-((4-chlorophenyl)sulfonyl)-3-methyl-4-((triethylsilyl)methylene)pyrrolidine (3c).** Colorless oil, 85% yield.  $[\alpha]_{\text{D}}^{25} = 22.6$  ( $c = 0.5$ ,  $\text{CH}_2\text{Cl}_2$ ).  $^1\text{H}$  NMR (400 MHz,  $\text{CDCl}_3$ )  $\delta$  7.77 (d,  $J = 6.8$  Hz, 2H), 7.52 (d,  $J = 6.4$  Hz, 2H), 5.27 (s, 1H), 4.09 (d,  $J = 14.0$  Hz, 1H), 3.59 (d,  $J = 14.4$  Hz, 1H), 3.28 (d,  $J = 9.6$  Hz, 1H), 3.16 (dd,  $J = 8.0, 5.2$  Hz, 1H), 2.75-2.69 (m, 1H), 1.06 (d,  $J = 6.8$  Hz, 3H), 0.90 (t,  $J = 8.0$  Hz, 9H), 0.58 (d,  $J = 8.4$  Hz, 6H).  $^{13}\text{C}$  NMR (100 MHz,  $\text{CDCl}_3$ )  $\delta$  157.6, 139.2, 134.7, 129.3, 129.0, 118.3, 55.6, 53.5, 37.8, 20.8, 7.4, 4.2. HRMS (ESI)  $m/z$  calcd for  $\text{C}_{18}\text{H}_{28}\text{ClNaNO}_2\text{SSi}$ ,  $[\text{M} + \text{Na}]^+ = 408.1196$ , found:408.1202.

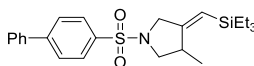

**(E)-1-([1,1'-biphenyl]-4-ylsulfonyl)-3-methyl-4-((triethylsilyl)methylene)pyrrolidine (3d).** Colorless oil, 95% yield.  $[\alpha]_{\text{D}}^{25} = 25.1$  ( $c = 1$ ,  $\text{CH}_2\text{Cl}_2$ ).  $^1\text{H}$  NMR (400 MHz,  $\text{CDCl}_3$ )  $\delta$  7.91 (d,  $J = 8.4$  Hz, 2H), 7.76 (d,  $J = 8.4$  Hz, 2H), 7.66-7.61 (m, 2H), 7.53-7.47 (m, 2H), 7.46-7.41 (m, 1H), 5.30 (s, 1H), 4.14 (d,  $J = 14.0$ , 1H), 3.68 (dd,  $J = 14.0, 2.0$  Hz, 1H), 3.34 (dd,  $J = 9.6, 1.6$  Hz, 1H), 3.23 (dd,  $J = 9.2, 5.6$  Hz, 1H), 2.78-2.71 (m, 1H), 1.09 (d,  $J = 7.2$  Hz, 3H), 0.91 (t,  $J = 8.0$  Hz, 9H), 0.59 (q,  $J = 8.0$  Hz, 6H).  $^{13}\text{C}$  NMR (100 MHz,  $\text{CDCl}_3$ )  $\delta$  158.1, 145.5, 139.2, 134.7, 129.0, 128.51, 128.2, 127.6, 127.3, 118.0, 55.6, 53.7, 37.9, 20.9, 7.4, 4.2. HRMS (ESI)  $m/z$  calcd for  $\text{C}_{24}\text{H}_{34}\text{NO}_2\text{SSi}$ ,  $[\text{M} + \text{H}]^+ = 428.2074$ , found:428.2075.

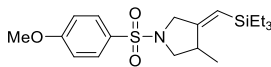

**(E)-1-((4-methoxyphenyl)sulfonyl)-3-methyl-4-((triethylsilyl)methylene)pyrrolidine (3e).** Colorless oil, 85% yield.  $[\alpha]_{\text{D}}^{25} = 18.6$  ( $c = 0.5$ ,  $\text{CH}_2\text{Cl}_2$ )  $^1\text{H}$  NMR (400 MHz,  $\text{CDCl}_3$ )  $\delta$  7.78 (d,  $J = 9.2$  Hz, 2H), 7.01 (d,  $J = 8.4$  Hz, 2H), 5.26 (s, 1H), 4.06 (dt,  $J = 14.0, 2.0$  Hz, 1H), 3.88 (s, 3H), 3.59 (dd,  $J = 14.0, 1.6$  Hz, 1H), 3.25 (dd,  $J = 9.2, 1.6$  Hz, 1H), 3.15 (dd,  $J = 9.2, 6.0$  Hz, 1H), 2.74-2.67 (m, 1H), 1.06 (d,  $J = 6.8$  Hz, 3H), 0.90 (t,  $J = 8.0$  Hz, 9H), 0.58 (q,  $J = 8.0$  Hz, 6H).  $^{13}\text{C}$  NMR (100 MHz,  $\text{CDCl}_3$ )  $\delta$  162.9, 158.3, 129.8, 127.7, 117.8, 114.1, 55.6, 55.5, 53.7, 37.8, 20.9, 7.4, 4.2. HRMS (ESI)  $m/z$  calcd for  $\text{C}_{19}\text{H}_{32}\text{NO}_3\text{SSi}$ ,  $[\text{M} + \text{H}]^+ = 382.1867$ , found:382.1862.

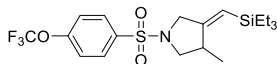

**(E)-3-methyl-4-((triethylsilyl)methylene)-1-((4-(trifluoromethoxy)phenyl)sulfonyl)pyrrolidine (3f).** Colorless oil, 83% yield.  $[\alpha]_{\text{D}}^{25} = 24.2$  ( $c = 0.5$ ,  $\text{CH}_2\text{Cl}_2$ ).  $^1\text{H}$  NMR (400 MHz,  $\text{CDCl}_3$ )  $\delta$  7.90 (d,  $J = 8.8$  Hz, 2H), 7.38 (d,  $J = 7.6$  Hz, 2H), 5.28 (s, 1H), 4.11 (d,  $J = 17.6$  Hz, 1H), 3.63 (dd,  $J = 14.0, 2.0$  Hz, 1H), 3.30 (dd,  $J = 9.2, 1.2$  Hz, 1H), 3.19 (dd,  $J = 9.2, 6$  Hz, 1H), 2.77-2.70 (m, 1H), 1.06 (d,  $J = 7.2$  Hz, 3H), 0.90 (t,  $J = 8.0$  Hz, 9H), 0.58 (q,  $J = 8.0$  Hz, 6H).  $^{13}\text{C}$  NMR (100 MHz,  $\text{CDCl}_3$ )  $\delta$  157.6, 152.2, 134.7, 129.7, 120.8, 120.2 (q,  $J = 259.6$  Hz), 118.4, 55.6, 53.5, 37.8, 20.7, 7.4, 4.1.  $^{19}\text{F}$  NMR (376 MHz,  $\text{CDCl}_3$ )  $\delta$  -57.74. HRMS (ESI)  $m/z$  calcd for  $\text{C}_{19}\text{H}_{29}\text{F}_3\text{NO}_3\text{SSi}$ ,  $[\text{M} + \text{H}]^+ = 436.1584$ , found: 436.1580.

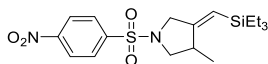

**(E)-3-methyl-1-((4-nitrophenyl)sulfonyl)-4-((triethylsilyl)methylene)pyrrolidine (3g).** White solid. 88% yield. mp: 88.5-89.5  $^{\circ}\text{C}$ .  $[\alpha]_{\text{D}}^{25} = 21.3$  ( $c = 0.5$ ,  $\text{CH}_2\text{Cl}_2$ ).  $^1\text{H}$  NMR (400 MHz,  $\text{CDCl}_3$ )  $\delta$  8.40 (d,  $J = 10.0$  Hz, 2H), 8.03 (d,  $J = 7.6$  Hz, 2H), 5.30 (s, 1H), 4.15 (d,  $J = 14.0$  Hz, 1H), 3.64 (d,  $J = 14.0$  Hz, 1H), 3.35 (d,  $J = 9.2$  Hz, 1H), 3.21 (dd,  $J = 8.4, 5.6$  Hz, 1H), 2.79-2.72 (m, 1H), 1.06 (d,  $J = 6.8$  Hz, 3H), 0.89 (t,  $J = 8.0$  Hz, 9H), 0.58 (q,  $J = 8.0$  Hz, 6H).  $^{13}\text{C}$  NMR (100 MHz,  $\text{CDCl}_3$ )  $\delta$  156.9, 150.1, 142.3, 128.6, 124.3, 118.9, 55.7, 53.4, 37.9, 20.7, 7.4, 4.1. HRMS (ESI)  $m/z$  calcd for  $\text{C}_{18}\text{H}_{29}\text{N}_2\text{O}_4\text{SSi}$ ,  $[\text{M} + \text{H}]^+ = 397.1612$ , found: 397.1618.



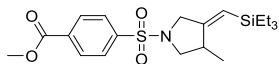

**methyl-(E)-4-((3-methyl-4-((triethylsilyl)methylene)pyrrolidin-1-yl)sulfonyl)benzoate (3h).** White solid. 95% yield. mp: 86.7-87.3 °C.  $[\alpha]_{\text{D}}^{25} = 23.0$  ( $c = 0.5$ ,  $\text{CH}_2\text{Cl}_2$ ).  $^1\text{H NMR}$  (400 MHz,  $\text{CDCl}_3$ )  $\delta$  8.19 (d,  $J = 8.8$  Hz, 2H), 7.89 (d,  $J = 8.4$  Hz, 2H), 5.25 (s, 1H), 4.10 (d,  $J = 16.0$  Hz, 1H), 3.95 (s, 3H), 3.61 (dd,  $J = 14.0, 2.0$  Hz, 1H), 3.29 (dd,  $J = 9.6, 1.2$  Hz, 1H), 3.17 (dd,  $J = 9.2, 4.8$  Hz, 1H), 2.74-2.67 (m, 1H), 1.02 (d,  $J = 7.2$  Hz, 3H), 0.87 (t,  $J = 8.0$  Hz, 9H), 0.55 (q,  $J = 8.0$  Hz, 6H).  $^{13}\text{C NMR}$  (100 MHz,  $\text{CDCl}_3$ )  $\delta$  165.6, 157.5, 140.1, 133.8, 130.2, 127.5, 118.4, 77.2, 55.6, 53.4, 52.6, 37.8, 20.7, 7.4, 4.1. HRMS (ESI)  $m/z$  calcd for  $\text{C}_{20}\text{H}_{32}\text{NO}_4\text{SSi}$ ,  $[\text{M} + \text{H}]^+ = 410.1816$ , found: 410.1812.

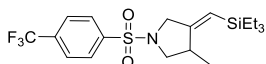

**(E)-3-methyl-4-((triethylsilyl)methylene)-1-((4-(trifluoromethyl)phenyl)sulfonyl)pyrrolidine (3i).** Colorless oil, 80% yield.  $[\alpha]_{\text{D}}^{25} = 17.3$  ( $c = 0.5$ ,  $\text{CH}_2\text{Cl}_2$ ).  $^1\text{H NMR}$  (400 MHz,  $\text{CDCl}_3$ )  $\delta$  7.97 (d,  $J = 7.6$  Hz, 2H), 7.82 (d,  $J = 8.0$  Hz, 2H), 5.29 (s, 1H), 4.13 (d,  $J = 14.0$  Hz, 1H), 3.63 (dd,  $J = 14.4, 2.0$  Hz, 1H), 3.33 (dd,  $J = 9.6, 2.0$  Hz, 1H), 3.20 (dd,  $J = 9.2, 6.4$  Hz, 1H), 2.77-2.70 (m, 1H), 1.07 (d,  $J = 7.2$  Hz, 3H), 0.90 (t,  $J = 8.0$  Hz, 9H), 0.58 (q,  $J = 8.0$  Hz, 6H).  $^{13}\text{C NMR}$  (100 MHz,  $\text{CDCl}_3$ )  $\delta$  157.3, 140.0, 134.3 (q,  $J = 32.8$  Hz), 128.0, 126.2 (q,  $J = 3.7$  Hz), 123.2 (q,  $J = 271.3$  Hz), 118.6, 55.6, 53.5, 37.8, 20.8, 7.4, 4.1. HRMS (ESI)  $m/z$  calcd for  $\text{C}_{19}\text{H}_{29}\text{F}_3\text{NO}_2\text{SSi}$ ,  $[\text{M} + \text{H}]^+ = 420.1635$ , found: 420.1633.

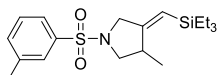

**(E)-3-methyl-1-(m-tolylsulfonyl)-4-((triethylsilyl)methylene)pyrrolidine (3j).** Colorless oil, 71% yield.  $[\alpha]_{\text{D}}^{25} = 18.9$  ( $c = 0.5$ ,  $\text{CH}_2\text{Cl}_2$ ).  $^1\text{H NMR}$  (400 MHz,  $\text{CDCl}_3$ )  $\delta$  7.65-7.61 (m, 2H), 7.45-7.39 (m, 2H), 5.27 (s, 1H), 4.10-4.05 (m, 1H), 3.61 (dd,  $J = 14.4, 2.0$  Hz, 1H), 3.28 (dd,  $J = 9.6, 1.6$  Hz, 1H), 3.17 (dd,  $J = 9.2, 5.6$  Hz, 1H), 2.76-2.66 (m, 1H), 2.44 (s, 3H), 1.05 (d,  $J = 7.2$  Hz, 3H), 0.89 (t,  $J = 8.0$  Hz, 9H), 0.57 (q,  $J = 8.0$  Hz, 6H).  $^{13}\text{C NMR}$  (100 MHz,  $\text{CDCl}_3$ )  $\delta$  158.2, 139.2, 135.9, 133.5, 128.8, 128.0, 124.8, 117.9, 55.5, 53.6, 37.8, 21.4, 20.8, 7.4, 4.2. HRMS (ESI)  $m/z$  calcd for  $\text{C}_{19}\text{H}_{32}\text{NO}_2\text{SSi}$ ,  $[\text{M} + \text{H}]^+ = 366.1918$ , found: 366.1920.

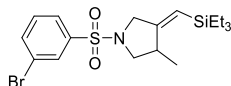

**(E)-1-((3-bromophenyl)sulfonyl)-3-methyl-4-((triethylsilyl)methylene)pyrrolidine (3k).** Colorless oil, 85% yield.  $[\alpha]_{\text{D}}^{25} = 14.3$  ( $c = 0.5$ ,  $\text{CH}_2\text{Cl}_2$ ).  $^1\text{H NMR}$  (400 MHz,  $\text{CDCl}_3$ )  $\delta$  7.97 (m, 1H), 7.77-7.11 (m, 2H), 7.45-7.40 (m, 1H), 5.29 (s, 1H), 4.10 (d,  $J = 14.4$  Hz, 1H), 3.61 (d,  $J = 14.0$  Hz, 1H), 3.30 (d,  $J = 9.2$  Hz, 1H), 3.19 (dd,  $J = 9.2, 6.0$  Hz, 1H), 2.80-2.70 (m, 1H), 1.06 (d,  $J = 7.2$  Hz, 3H), 0.90 (t,  $J = 8.0$  Hz, 9H), 0.58 (q,  $J = 8.0$  Hz, 6H).  $^{13}\text{C NMR}$  (100 MHz,  $\text{CDCl}_3$ )  $\delta$  157.5, 138.2, 135.7, 130.6, 130.4, 126.1, 123.1, 118.4, 55.6, 53.5, 37.8, 20.8, 7.48, 4.2. HRMS (ESI)  $m/z$  calcd for  $\text{C}_{18}\text{H}_{28}\text{BrNaNO}_2\text{SSi}$ ,  $[\text{M} + \text{Na}]^+ = 452.0691$ , found: 452.0682.

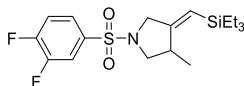

**(E)-1-((3,4-difluorophenyl)sulfonyl)-3-methyl-4-((triethylsilyl)methylene)pyrrolidine (3l).** Colorless oil, 88% yield.  $[\alpha]_{\text{D}}^{25} = 16.3$  ( $c = 0.5$ ,  $\text{CH}_2\text{Cl}_2$ ).  $^1\text{H NMR}$  (400 MHz,  $\text{CDCl}_3$ )  $\delta$  7.71-7.66 (m, 1H), 7.65-7.61 (m, 1H), 7.36 (q,  $J = 8.4$  Hz, 1H), 5.30 (s, 1H), 4.15-4.08 (m, 1H), 3.61 (dd,  $J = 14.0, 2.0$  Hz, 1H), 3.30 (dd,  $J = 9.2, 1.2$  Hz, 1H), 3.18 (dd,  $J = 9.6, 6.0$  Hz, 1H), 2.78-2.72 (m, 1H), 1.08 (d,  $J = 6.8$  Hz, 3H), 0.91 (t,  $J = 8.0$  Hz, 9H), 0.59 (q,  $J = 8.0$  Hz, 6H).  $^{13}\text{C NMR}$  (100 MHz,  $\text{CDCl}_3$ )  $\delta$  157.3, 153.1 (dd,  $J = 255.2, 12.5$  Hz), 150.1 (dd,  $J = 253.1, 13.4$  Hz), 133.3, 124.6 (dd,  $J = 7.3, 4.0$  Hz), 118.5, 118.2 (d,  $J = 18.2$  Hz), 117.4 (d,  $J = 19.3$  Hz), 55.6, 55.5, 37.8, 20.8, 7.4, 4.1.  $^{19}\text{F NMR}$  (376 MHz,  $\text{CDCl}_3$ )  $\delta$  -129.55 (d,  $J = 5.5$  Hz, 1F), -133.66 (d,  $J = 5.6$  Hz, 1F). HRMS (ESI)  $m/z$  calcd for  $\text{C}_{18}\text{H}_{28}\text{F}_2\text{NO}_2\text{SSi}$ ,  $[\text{M} + \text{H}]^+ = 388.1573$ , found: 388.1575.

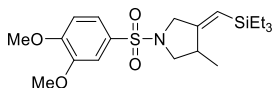

**(E)-1-((3,4-dimethoxyphenyl)sulfonyl)-3-methyl-4-((triethylsilyl)methylene)pyrrolidine (3m).** Colorless oil, 90% yield.  $[\alpha]_D^{25} = 19.6$  ( $c = 0.5$ ,  $\text{CH}_2\text{Cl}_2$ ).  $^1\text{H NMR}$  (400 MHz,  $\text{CDCl}_3$ )  $\delta$  7.43 (d,  $J = 8.4$  Hz, 1H), 7.28 (d,  $J = 2.4$  Hz, 1H), 6.97 (d,  $J = 8.4$  Hz, 1H), 5.26 (s, 1H), 4.06 (d,  $J = 14.4$  Hz, 1H), 3.94 (s, 3H), 3.93 (s, 3H), 3.59 (dd,  $J = 14.0$ , 2.0 Hz, 1H), 3.26 (dd,  $J = 9.2$ , 2.0 Hz, 1H), 3.15 (dd,  $J = 9.2$ , 5.6 Hz, 1H), 2.79-2.66 (m, 1H), 1.06 (d,  $J = 6.8$  Hz, 3H), 0.89 (t,  $J = 8.0$  Hz, 9H), 0.57 (q,  $J = 8.0$  Hz, 6H).  $^{13}\text{C NMR}$  (100 MHz,  $\text{CDCl}_3$ )  $\delta$  158.2, 152.5, 148.9, 127.8, 121.6, 117.9, 110.5, 110.2, 56.2, 56.16, 55.6, 53.7, 37.8, 20.9, 7.4, 4.2. HRMS (ESI)  $m/z$  calcd for  $\text{C}_{20}\text{H}_{34}\text{NO}_4\text{SSi}$ ,  $[\text{M} + \text{H}]^+ = 412.1972$ , found: 412.1975.

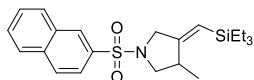

**(E)-3-methyl-1-(naphthalen-2-ylsulfonyl)-4-((triethylsilyl)methylene)pyrrolidine (3n).** Colorless oil, 85% yield.  $[\alpha]_D^{25} = 10.7$  ( $c = 0.5$ ,  $\text{CH}_2\text{Cl}_2$ ).  $^1\text{H NMR}$  (400 MHz,  $\text{CDCl}_3$ )  $\delta$  8.42 (d,  $J = 1.6$  Hz, 1H), 8.04-7.97 (m, 2H), 7.96-7.91 (m, 1H), 7.85 (dd,  $J = 8.4$ , 1.6 Hz, 1H), 7.69-7.60 (m, 2H), 5.26 (s, 1H), 4.20-4.13 (m, 1H), 3.68 (dd,  $J = 14.0$ , 1.6 Hz, 1H), 3.38 (dd,  $J = 9.2$ , 1.2 Hz, 1H), 3.24 (dd,  $J = 9.6$ , 6.0 Hz, 1H), 2.76-2.67 (m, 1H), 1.07 (d,  $J = 7.2$  Hz, 3H), 0.87 (t,  $J = 8.0$  Hz, 9H), 0.55 (q,  $J = 8.0$  Hz, 6H).  $^{13}\text{C NMR}$  (100 MHz,  $\text{CDCl}_3$ )  $\delta$  158.0, 134.8, 133.2, 132.2, 129.28, 129.25, 128.9, 128.7, 127.9, 127.5, 123.1, 118.0, 55.6, 53.7, 37.9, 20.9, 7.4, 4.2. HRMS (ESI)  $m/z$  calcd for  $\text{C}_{22}\text{H}_{32}\text{NO}_2\text{SSi}$ ,  $[\text{M} + \text{H}]^+ = 402.1918$ , found: 402.1914.

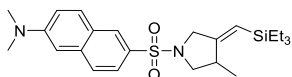

**(E)-N,N-dimethyl-6-((3-methyl-4-((triethylsilyl)methylene)pyrrolidin-1-yl)sulfonyl)naphthalen-2-amine (3o).** Yellow oil, 75% yield,  $[\alpha]_D^{25} = 11.2$  ( $c = 0.5$ ,  $\text{CH}_2\text{Cl}_2$ ).  $^1\text{H NMR}$  (400 MHz,  $\text{CDCl}_3$ )  $\delta$  8.57 (d,  $J = 8.4$  Hz, 1H), 8.50 (d,  $J = 8.8$  Hz, 1H), 8.26 (dd,  $J = 7.6$ , 1.6 Hz, 1H), 7.56 (q,  $J = 7.2$  Hz, 2H), 7.20 (d,  $J = 7.2$  Hz, 1H), 5.26 (s, 1H), 4.15-4.08 (m, 1H), 3.79 (dd,  $J = 14.0$ , 1.6 Hz, 1H), 3.46-3.37 (m, 2H), 2.90 (s, 6H), 2.80-2.72 (m, 1H), 1.08 (d,  $J = 7.2$  Hz, 3H), 0.91 (t,  $J = 8.0$  Hz, 9H), 0.58 (q,  $J = 8.0$  Hz, 6H).  $^{13}\text{C NMR}$  (100 MHz,  $\text{CDCl}_3$ )  $\delta$  158.5, 151.4, 133.6, 130.6, 130.5, 130.1, 130.0, 127.9, 123.2, 119.8, 117.7, 115.1, 55.0, 53.1, 45.4, 38.2, 20.8, 7.4, 4.2. HRMS (ESI)  $m/z$  calcd for  $\text{C}_{24}\text{H}_{37}\text{N}_2\text{O}_2\text{SSi}$ ,  $[\text{M} + \text{H}]^+ = 445.2340$ , found: 445.2332.

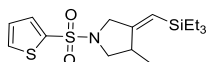

**(E)-3-methyl-1-(thiophen-2-ylsulfonyl)-4-((triethylsilyl)methylene)pyrrolidine (3p).** White solid. 86% yield. m.p: 83.3-84.1 °C.  $[\alpha]_D^{25} = 19.3$  ( $c = 0.5$ ,  $\text{CH}_2\text{Cl}_2$ ).  $^1\text{H NMR}$  (400 MHz,  $\text{CDCl}_3$ )  $\delta$  7.63-7.59 (m, 2H), 7.16 (dd,  $J = 5.2$ , 3.6 Hz, 1H), 5.29 (s, 1H), 4.15-4.11 (m, 1H), 3.69 (dd,  $J = 14.4$ , 2.0 Hz, 1H), 3.30 (dd,  $J = 9.6$ , 1.6 Hz, 1H), 3.24 (dd,  $J = 9.6$ , 5.6 Hz, 1H), 2.78-2.71 (m, 1H), 1.05 (d,  $J = 7.2$  Hz, 3H), 0.90 (t,  $J = 8.0$  Hz, 9H), 0.58 (q,  $J = 8.0$  Hz, 6H).  $^{13}\text{C NMR}$  (100 MHz,  $\text{CDCl}_3$ )  $\delta$  157.7, 136.1, 132.2, 131.8, 127.5, 118.2, 55.7, 53.7, 37.9, 20.8, 7.4, 4.2. HRMS (ESI)  $m/z$  calcd for  $\text{C}_{16}\text{H}_{28}\text{NO}_2\text{S}_2\text{Si}$ ,  $[\text{M} + \text{H}]^+ = 358.1325$ , found: 358.1327.

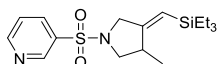

**(E)-3-((3-methyl-4-((triethylsilyl)methylene)pyrrolidin-1-yl)sulfonyl)pyridine (3q).** Colorless oil, 72% yield.  $[\alpha]_D^{25} = 16.9$  ( $c = 0.5$ ,  $\text{CH}_2\text{Cl}_2$ ).  $^1\text{H NMR}$  (400 MHz,  $\text{CDCl}_3$ )  $\delta$  9.05 (dd,  $J = 2.4$ , 1.2 Hz, 1H), 8.82 (dd,  $J = 4.8$ , 2.0 Hz, 1H), 8.11 (dt,  $J = 8.0$ , 2.0 Hz, 1H), 7.51-7.48 (m, 1H), 5.28 (s, 1H), 4.12 (d,  $J = 11.6$  Hz, 1H), 3.63 (dd,  $J = 14.4$ , 1.2 Hz, 1H), 3.32 (dd,  $J = 9.2$ , 1.2 Hz, 1H), 3.19 (dd,  $J = 9.6$ , 6.0 Hz, 1H), 2.76-2.69 (m, 1H), 1.05 (d,  $J = 7.2$  Hz, 3H), 0.88 (t,  $J = 8.0$  Hz, 9H), 0.56 (q,  $J = 8.0$  Hz, 6H).  $^{13}\text{C NMR}$  (100 MHz,  $\text{CDCl}_3$ )  $\delta$  157.1, 153.3, 148.3, 135.2, 133.1, 123.78, 118.7, 55.5, 53.4, 37.8, 20.7, 7.4, 4.1. HRMS (ESI)  $m/z$  calcd for  $\text{C}_{17}\text{H}_{29}\text{N}_2\text{O}_2\text{SSi}$ ,  $[\text{M} + \text{H}]^+ = 353.1714$ , found: 353.1719.

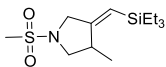

**(E)-3-methyl-1-(methylsulfonyl)-4-((triethylsilyl)methylene)pyrrolidine (3r).** Colorless oil, 82% yield.  $[\alpha]_{D^{25}} = 18.5$  ( $c = 0.5$ ,  $\text{CH}_2\text{Cl}_2$ ).  $^1\text{H NMR}$  (400 MHz,  $\text{CDCl}_3$ )  $\delta$  5.36 (s, 1H), 4.20-4.45 (m, 1H), 3.78 (dd,  $J = 14.0, 1.6$  Hz, 1H), 3.37-3.29 (m, 2H), 2.85 (s, 3H), 2.80-2.88 (m, 1H), 1.20 (d,  $J = 6.8$  Hz, 3H), 0.95 (t,  $J = 8.0$  Hz, 9H), 0.63 (q,  $J = 8.0$  Hz, 6H).  $^{13}\text{C NMR}$  (100 MHz,  $\text{CDCl}_3$ )  $\delta$  158.0, 118.3, 55.4, 53.4, 38.2, 34.6, 20.8, 7.4, 4.2. HRMS (ESI)  $m/z$  calcd for  $\text{C}_{13}\text{H}_{28}\text{NO}_2\text{SSi}$ ,  $[\text{M} + \text{H}]^+ = 290.1605$ , found: 290.1609.

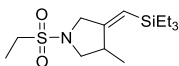

**(E)-1-(ethylsulfonyl)-3-methyl-4-((triethylsilyl)methylene)pyrrolidine (3s).** Colorless oil, 67% yield.  $[\alpha]_{D^{25}} = 16.1$  ( $c = 0.5$ ,  $\text{CH}_2\text{Cl}_2$ ).  $^1\text{H NMR}$  (400 MHz,  $\text{CDCl}_3$ )  $\delta$  5.32 (s, 1H), 4.20-4.15 (m, 1H), 3.83 (dd,  $J = 14.0, 1.6$  Hz, 1H), 3.41 (dd,  $J = 9.6, 6.0$  Hz, 1H), 3.31 (dd,  $J = 9.6, 1.6$  Hz, 1H), 3.02 (q,  $J = 7.2$  Hz, 2H), 2.85-2.78 (m, 1H), 1.37 (t,  $J = 7.2$  Hz, 3H), 1.18 (d,  $J = 7.2$  Hz, 3H), 0.93 (t,  $J = 8.0$  Hz, 9H), 0.62 (q,  $J = 8.0$  Hz, 6H).  $^{13}\text{C NMR}$  (100 MHz,  $\text{CDCl}_3$ )  $\delta$  158.4, 117.9, 55.3, 53.2, 44.4, 38.2, 20.7, 7.9, 7.4, 4.2. HRMS (ESI)  $m/z$  calcd for  $\text{C}_{14}\text{H}_{30}\text{NO}_2\text{SSi}$ ,  $[\text{M} + \text{H}]^+ = 304.1761$ , found: 304.1768.

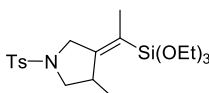

**1-(4-Toluenesulfonyl)-3-(E)-(1-(triethoxysilyl)ethylidene)-4-methylpyrrolidine (3t).** Colorless liquid, 60 % yield,  $[\alpha]_{D^{25}} = 35.6$  ( $c = 1.5$ , DCM).  $^1\text{H NMR}$  (400 MHz,  $\text{CDCl}_3$ )  $\delta$  7.64 (d,  $J = 8.0$  Hz, 2H), 7.26 (d,  $J = 8.0$  Hz, 2H), 3.96 (dt,  $J = 15.2, 1.2$  Hz, 1H), 3.70 (q,  $J = 6.8$  Hz, 6H), 3.47 (dd,  $J = 15.2, 1.2$  Hz, 1H), 3.22 (d,  $J = 9.2$  Hz, 1H), 3.11-3.04 (m, 1H), 2.90 (dd,  $J = 9.2, 6.0$  Hz, 1H), 2.37 (s, 3H), 1.52 (q,  $J = 0.8$  Hz, 3H), 1.12 (t,  $J = 6.8$  Hz, 9H), 1.04 (d,  $J = 6.8$  Hz, 3H).  $^{13}\text{C NMR}$  (100 MHz,  $\text{CDCl}_3$ )  $\delta$  156.0, 143.5, 132.6, 129.6, 127.8, 119.7, 58.4, 55.2, 50.5, 37.8, 21.5, 21.3, 18.1, 17.5. HRMS (ESI)  $m/z$  Calcd for  $\text{C}_{20}\text{H}_{34}\text{NO}_3\text{SSi}$ ,  $[\text{M} + \text{H}]^+ = 395.1945$ . Found: 395.1940.

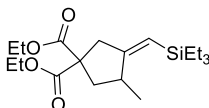

**4,4-Bis(methoxycarbonyl)-1-(E)-(triethylsilyl)methylidene-2-methylcyclopentane (3u):** Colorless liquid, 75 % yield,  $[\alpha]_{D^{25}} = -2.3$  ( $c = 0.5$ , DCM).  $^1\text{H NMR}$  (400 MHz,  $\text{CDCl}_3$ )  $\delta$  5.21-5.20 (m, 1H), 4.17-4.04 (m, 4H), 3.20 (td,  $J = 16.0, 2.4$  Hz, 1H), 2.69 (d,  $J = 2.4$  Hz, 1H), 2.65-2.55 (m, 2H), 1.84-1.78 (m, 1H), 1.19-1.13 (m, 6H), 1.01 (d,  $J = 6.8$  Hz, 3H), 0.85 (t,  $J = 8.0$  Hz, 9H), 0.51 (q,  $J = 8.0$  Hz, 6H).  $^{13}\text{C NMR}$  (100 MHz,  $\text{CDCl}_3$ )  $\delta$  172.2, 171.7, 163.7, 117.3, 61.42, 61.3, 58.5, 44.5, 41.9, 36.9, 22.5, 14.0, 7.5, 4.3. HRMS (ESI)  $m/z$  Calcd for  $\text{C}_{19}\text{H}_{35}\text{O}_4\text{Si}$ ,  $[\text{M} + \text{H}]^+ = 355.2299$ . Found: 355.2294.

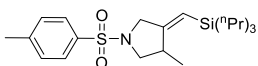

**(E)-3-methyl-1-tosyl-4-((tripropylsilyl)methylene)pyrrolidine (3v).** Colorless oil, 90% yield.  $[\alpha]_{D^{25}} = 15.7$  ( $c = 0.5$ ,  $\text{CH}_2\text{Cl}_2$ ).  $^1\text{H NMR}$  (400 MHz,  $\text{CDCl}_3$ )  $\delta$  7.71 (d,  $J = 8.4$  Hz, 2H), 7.33 (d,  $J = 8.4$  Hz, 2H), 5.25 (s, 1H), 4.03-4.07 (m, 1H), 3.58 (dd,  $J = 14.0, 2.0$  Hz, 1H), 3.26 (dd,  $J = 9.2, 1.2$  Hz, 1H), 3.15 (dd,  $J = 9.2, 6.0$  Hz, 1H), 2.72-2.65 (m, 1H), 2.44 (s, 3H), 1.31-1.21 (m, 6H), 1.04 (d,  $J = 7.2$  Hz, 3H), 0.92 (t,  $J = 7.2$  Hz, 9H), 0.55 (q,  $J = 4.8$  Hz, 6H).  $^{13}\text{C NMR}$  (100 MHz,  $\text{CDCl}_3$ )  $\delta$  157.6, 143.4, 133.1, 129.6, 127.7, 118.7, 55.5, 53.7, 37.7, 21.5, 20.8, 18.5, 17.4, 16.1. HRMS (ESI)  $m/z$  calcd for  $\text{C}_{22}\text{H}_{38}\text{NO}_2\text{SSi}$ ,  $[\text{M} + \text{H}]^+ = 408.2387$ , found: 408.2381.

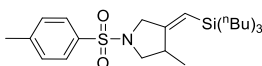

**(E)-3-methyl-1-tosyl-4-((tributylsilyl)methylene)pyrrolidine (3w).** Colorless oil, 90% yield.  $[\alpha]_{D^{25}} = 13.1$  ( $c = 0.5$ ,  $\text{CH}_2\text{Cl}_2$ ).  $^1\text{H NMR}$  (400 MHz,  $\text{CDCl}_3$ )  $\delta$  7.72 (d,  $J = 7.6$  Hz, 2H), 7.33 (d,  $J = 8.0$  Hz, 2H), 5.25 (s, 1H), 4.06 (dt,  $J =$

14.0, 1.6 Hz, 1H), 3.58 (dd,  $J = 14.0, 1.6$  Hz, 1H), 3.26 (d,  $J = 9.2$  Hz, 1H), 3.14 (dd,  $J = 9.2, 6.0$  Hz, 1H), 2.72-2.66 (m, 1H), 2.43 (s, 3H), 1.36-1.16 (m, 12H), 1.05 (d,  $J = 6.8$  Hz, 3H), 0.86 (q,  $J = 7.2$  Hz, 9H), 0.55 (t,  $J = 5.2$  Hz, 6H).  $^{13}\text{C}$  NMR (100 MHz,  $\text{CDCl}_3$ )  $\delta$  157.7, 143.4, 133.0, 129.6, 127.7, 118.7, 55.5, 53.6, 37.8, 26.7, 26.1, 21.5, 20.7, 13.7, 13.0. HRMS (ESI)  $m/z$  calcd for  $\text{C}_{25}\text{H}_{44}\text{NO}_2\text{SSi}$ ,  $[\text{M} + \text{H}]^+ = 450.2857$ , found: 450.2852.

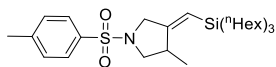

**(E)-3-methyl-1-tosyl-4-((triHexsilyl)methylene)pyrrolidine (3x).** Colorless oil, 90% yield.  $[\alpha]_{\text{D}}^{25} = 11.5$  ( $c = 0.5$ ,  $\text{CH}_2\text{Cl}_2$ ).  $^1\text{H}$  NMR (400 MHz,  $\text{CDCl}_3$ )  $\delta$  7.72 (d,  $J = 8.0$  Hz, 2H), 7.33 (d,  $J = 8.0$  Hz, 2H), 5.25 (s, 1H), 4.06 (dt,  $J = 14.0, 1.6$  Hz, 1H), 3.58 (dd,  $J = 14.0, 1.6$  Hz, 1H), 3.27 (dd,  $J = 9.6, 1.2$  Hz, 1H), 3.13 (dd,  $J = 9.2, 6.4$  Hz, 1H), 3.15-3.11 (m, 1H), 2.43 (s, 3H), 1.38-1.16 (m, 24H), 1.05 (d,  $J = 6.8$  Hz, 3H), 0.90-0.84 (m, 9H), 0.57-0.53 (m, 6H).  $^{13}\text{C}$  NMR (100 MHz,  $\text{CDCl}_3$ )  $\delta$  157.6, 143.4, 133.1, 129.6, 127.7, 118.7, 55.5, 53.6, 37.8, 33.4, 31.4, 23.8, 22.5, 21.5, 20.7, 14.1, 13.3. HRMS (ESI)  $m/z$  calcd for  $\text{C}_{31}\text{H}_{56}\text{NO}_2\text{SSi}$ ,  $[\text{M} + \text{H}]^+ = 534.3796$ , found: 534.3790.

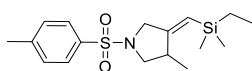

**(E)-3-((ethyldimethylsilyl)methylene)-4-methyl-1-tosyl-4i3-pyrrolidine (3y).** Colorless oil, 85% yield.  $[\alpha]_{\text{D}}^{25} = 33.7$  ( $c = 0.5$ ,  $\text{CH}_2\text{Cl}_2$ ).  $^1\text{H}$  NMR (400 MHz,  $\text{CDCl}_3$ )  $\delta$  7.71 (d,  $J = 8.0$  Hz, 2H), 7.33 (d,  $J = 7.6$  Hz, 2H), 5.29-5.27 (m, 1H), 4.06-4.02 (m, 1H), 3.56 (dd,  $J = 14.0, 1.6$  Hz, 1H), 3.25 (dd,  $J = 9.6, 1.6$  Hz, 1H), 3.14 (dd,  $J = 9.6, 6.0$  Hz, 1H), 2.78-2.72 (m, 1H), 2.43 (s, 3H), 1.07 (d,  $J = 7.2$  Hz, 3H), 0.89 (t,  $J = 8.0$  Hz, 3H), 0.51 (q,  $J = 8.0$  Hz, 2H), 0.04 (s, 3H), 0.05 (s, 3H).  $^{13}\text{C}$  NMR (100 MHz,  $\text{CDCl}_3$ )  $\delta$  157.7, 143.5, 132.8, 129.6, 127.8, 119.9, 55.5, 53.7, 37.4, 21.5, 21.0, 8.0, 7.3, -2.3, -2.4. HRMS (ESI)  $m/z$  calcd for  $\text{C}_{17}\text{H}_{28}\text{NO}_2\text{SSi}$ ,  $[\text{M} + \text{H}]^+ = 338.1605$ , found: 338.1610.

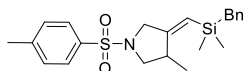

**(E)-3-((benzylidimethylsilyl)methylene)-4-methyl-1-tosylpyrrolidine (3z).** Colorless oil, 96% yield.  $[\alpha]_{\text{D}}^{25} = 27.9$  ( $c = 0.5$ ,  $\text{CH}_2\text{Cl}_2$ ).  $^1\text{H}$  NMR (400 MHz,  $\text{CDCl}_3$ )  $\delta$  7.73 (d,  $J = 8.4$  Hz, 2H), 7.37 (d,  $J = 8.0$  Hz, 2H), 7.15 (t,  $J = 6.8$  Hz, 2H), 7.06 (t,  $J = 7.2$  Hz, 1H), 6.93 (d,  $J = 6.4$  Hz, 2H), 5.27-5.26 (m, 1H), 4.09-4.04 (m, 1H), 3.56 (dd,  $J = 17.6, 2.0$  Hz, 1H), 3.22 (dd,  $J = 9.2, 1.2$  Hz, 1H), 3.03 (dd,  $J = 9.2, 6.0$  Hz, 1H), 2.58-2.50 (m, 1H), 2.46 (s, 3H), 2.11 (s, 2H), 0.99 (d,  $J = 6.8$  Hz, 3H), 0.10 (s, 3H), 0.08 (s, 3H).  $^{13}\text{C}$  NMR (100 MHz,  $\text{CDCl}_3$ )  $\delta$  158.7, 143.6, 139.5, 132.7, 129.6, 128.1, 128.1, 127.8, 124.1, 118.8, 55.4, 53.7, 37.5, 26.5, 21.6, 20.9, -1.9, -2.1. HRMS (ESI)  $m/z$  calcd for  $\text{C}_{22}\text{H}_{30}\text{NO}_2\text{SSi}$ ,  $[\text{M} + \text{H}]^+ = 400.1761$ , found: 400.1758.

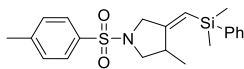

**(E)-3-((benzylidimethylsilyl)methylene)-4-methyl-1-tosylpyrrolidine (3aa).** Colorless oil, 78% yield.  $[\alpha]_{\text{D}}^{25} = 25.1$  ( $c = 0.5$ ,  $\text{CH}_2\text{Cl}_2$ ).  $^1\text{H}$  NMR (400 MHz,  $\text{CDCl}_3$ )  $\delta$  7.72 (d,  $J = 8.4$  Hz, 2H), 7.48 (dd,  $J = 7.2, 1.6$  Hz, 2H), 7.38-7.32 (m, 5H), 5.48 (q,  $J = 2.0$  Hz, 1H), 4.12-4.06 (m, 1H), 3.63 (dd,  $J = 14.4, 2.0$  Hz, 1H), 3.21 (dd,  $J = 9.6, 1.6$  Hz, 1H), 3.11 (dd,  $J = 9.2, 6.0$  Hz, 1H), 2.70-2.61 (m, 1H), 2.46 (s, 3H), 0.95 (d,  $J = 6.8$  Hz, 3H), 0.38 (s, 3H), 0.36 (s, 3H).  $^{13}\text{C}$  NMR (100 MHz,  $\text{CDCl}_3$ )  $\delta$  159.1, 143.5, 138.5, 133.6, 132.8, 129.6, 129.1, 127.9, 127.8, 119.0, 55.4, 53.8, 37.3, 21.5, 20.6, -1.1, -1.3. HRMS (ESI)  $m/z$  calcd for  $\text{C}_{21}\text{H}_{28}\text{NO}_2\text{SSi}$ ,  $[\text{M} + \text{H}]^+ = 386.1605$ , found: 386.1601.

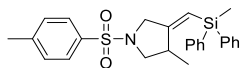

**(E)-3-(2,2-diphenylpropylidene)-4-methyl-1-tosylpyrrolidine (3ab).** Colorless oil, 40% yield.  $[\alpha]_{\text{D}}^{25} = 17.7$  ( $c = 0.5$ ,  $\text{CH}_2\text{Cl}_2$ ).  $^1\text{H}$  NMR (400 MHz,  $\text{CDCl}_3$ )  $\delta$  7.74 (d,  $J = 8.4$  Hz, 2H), 7.50 (td,  $J = 7.6, 1.6$  Hz, 4H), 7.44-7.35 (m, 8H), 5.70 (s, 1H), 4.20-4.12 (m, 1H), 3.72 (dd,  $J = 14.4, 2.0$  Hz, 1H), 3.17 (dd,  $J = 9.2, 2.0$  Hz, 1H), 3.10 (dd,  $J = 9.6, 6.0$  Hz, 1H), 2.58-2.50 (m, 1H), 2.47 (s, 3H), 0.82 (d,  $J = 7.2$  Hz, 3H), 0.66 (s, 3H).  $^{13}\text{C}$  NMR (100 MHz,  $\text{CDCl}_3$ )  $\delta$  160.9, 143.6, 136.7, 136.42, 134.6, 134.6, 134.0, 132.9, 129.6, 129.5, 129.4, 127.9, 127.9, 127.8, 117.1, 55.4, 54.0, 37.3, 21.60, 20.3, -2.2. HRMS (ESI)  $m/z$  calcd for  $\text{C}_{26}\text{H}_{30}\text{NO}_2\text{SSi}$ ,  $[\text{M} + \text{H}]^+ = 448.1761$ , found: 448.1767.

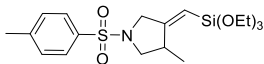

**(E)-3-methyl-1-tosyl-4-((triethoxysilyl)methylene)-313-pyrrolidine (3ac).** Colorless oil, 50% yield.  $[\alpha]_{\text{D}}^{25} = 22.3$  ( $c = 0.5$ ,  $\text{CH}_2\text{Cl}_2$ ).  $^1\text{H NMR}$  (400 MHz,  $\text{CDCl}_3$ )  $\delta$  7.70 (d,  $J = 8.0$  Hz, 2H), 7.33 (d,  $J = 8.0$  Hz, 2H), 5.14 (s, 1H), 4.07 (dt,  $J = 14.8$ , 2.0 Hz, 1H), 3.78 (q,  $J = 6.8$  Hz, 6H), 3.59 (dd,  $J = 15.2$ , 2.0 Hz, 1H), 3.24 (dd,  $J = 8.8$ , 1.6 Hz, 1H), 3.13 (dd,  $J = 9.2$ , 6.0 Hz, 1H), 3.09-3.01 (m, 1H), 2.44 (s, 3H), 1.20 (t,  $J = 6.8$  Hz, 9H), 1.13 (d,  $J = 7.2$  Hz, 3H).  $^{13}\text{C NMR}$  (100 MHz,  $\text{CDCl}_3$ )  $\delta$  164.0, 143.6, 132.5, 129.6, 127.8, 110.8, 58.4, 55.4, 53.7, 38.0, 21.5, 20.5, 18.1. HRMS (ESI)  $m/z$  calcd for  $\text{C}_{19}\text{H}_{32}\text{NO}_5\text{SSi}$ ,  $[\text{M} + \text{H}]^+ = 414.1765$ , found: 414.1761.

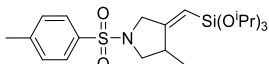

**(E)-3-methyl-1-tosyl-4-((triisopropoxysilyl)methylene)pyrrolidine (3ad).** Colorless oil, 56% yield.  $[\alpha]_{\text{D}}^{25} = 22.5$  ( $c = 0.5$ ,  $\text{CH}_2\text{Cl}_2$ ).  $^1\text{H NMR}$  (400 MHz,  $\text{CDCl}_3$ )  $\delta$  7.70 (d,  $J = 8.4$  Hz, 2H), 7.33 (d,  $J = 8.0$  Hz, 2H), 5.12 (s, 1H), 4.23-4.15 (m, 3H), 4.10-4.05 (m, 1H), 3.57 (dd,  $J = 14.8$ , 2.0 Hz, 1H), 3.25 (d,  $J = 8.4$  Hz, 1H), 3.18-3.08 (m, 2H), 2.44 (s, 3H), 1.17 (d,  $J = 2.8$  Hz, 9H), 1.16 (d,  $J = 2.4$  Hz, 9H), 1.13 (d,  $J = 6.8$  Hz, 3H).  $^{13}\text{C NMR}$  (100 MHz,  $\text{CDCl}_3$ )  $\delta$  162.7, 143.5, 132.5, 129.6, 127.8, 112.6, 65.2, 55.4, 53.7, 37.7, 25.5, 25.4, 21.5, 20.7. HRMS (ESI)  $m/z$  calcd for  $\text{C}_{22}\text{H}_{38}\text{NO}_5\text{SSi}$ ,  $[\text{M} + \text{H}]^+ = 456.2234$ , found: 456.2238.

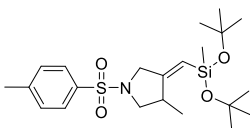

**(E)-3-((di-tert-butoxy(methyl)silyl)methylene)-4-methyl-1-tosylpyrrolidine (3ae).** Colorless oil, 70% yield.  $[\alpha]_{\text{D}}^{25} = 21.5$  ( $c = 0.5$ ,  $\text{CH}_2\text{Cl}_2$ ).  $^1\text{H NMR}$  (400 MHz,  $\text{CDCl}_3$ )  $\delta$  7.71 (d,  $J = 8.4$  Hz, 2H), 7.34 (d,  $J = 8.0$  Hz, 2H), 5.15 (q,  $J = 2.0$  Hz, 1H), 4.06-4.01 (m, 1H), 3.55 (dd,  $J = 9.2$ , 1.6 Hz, 1H), 3.24 (dd,  $J = 9.2$ , 2.0 Hz, 1H), 3.13 (dd,  $J = 9.2$ , 6.0 Hz, 1H), 3.02-2.92 (m, 1H), 2.44 (s, 3H), 1.10 (d,  $J = 7.2$  Hz, 3H), 0.13 (s, 3H), 0.08 (s, 18H).  $^{13}\text{C NMR}$  (100 MHz,  $\text{CDCl}_3$ )  $\delta$  158.9, 143.5, 132.5, 129.6, 127.8, 118.7, 55.4, 53.6, 37.3, 21.5, 20.9, 1.8. HRMS (ESI)  $m/z$  calcd for  $\text{C}_{22}\text{H}_{38}\text{NO}_4\text{SSi}$ ,  $[\text{M} + \text{H}]^+ = 440.2285$ , found: 440.2293.

#### 8.4. Characterization data for the desilylated compounds.

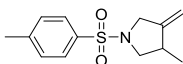

**1-(4-Toluenesulfonyl)-3-methylidene-4-methylpyrrolidine (3a').** White solid, 91% yield. mp: 62.3-63.3 °C, 91% ee.  $[\alpha]_{\text{D}}^{25} = 26.2$  ( $c = 0.5$ ,  $\text{CH}_2\text{Cl}_2$ ).  $^1\text{H NMR}$  (400 MHz,  $\text{CDCl}_3$ )  $\delta$  7.72 (d,  $J = 8.4$  Hz, 2H), 7.34 (d,  $J = 7.6$  Hz, 2H), 4.92 (d,  $J = 2.0$  Hz, 1H), 4.87 (d,  $J = 2.4$  Hz, 1H), 3.99-3.94 (m, 1H), 3.77-3.72 (m, 1H), 3.61-3.56 (m, 1H), 2.74-2.65 (m, 2H), 2.45 (s, 3H), 1.06 (d,  $J = 6.4$  Hz, 3H).  $^{13}\text{C NMR}$  (100 MHz,  $\text{CDCl}_3$ )  $\delta$  149.3, 143.6, 132.8, 129.6, 127.8, 106.0, 55.0, 52.1, 37.4, 21.5, 16.0. HRMS (ESI)  $m/z$  calcd for  $\text{C}_{13}\text{H}_{18}\text{NO}_2\text{S}$ ,  $[\text{M} + \text{H}]^+ = 252.1053$ , found: 252.1059. The ee of **3a'** was determined by HPLC analysis using Daicel Chiralcel AD-H column (25 cm  $\times$  0.46 cm ID), conditions:  $n$ -hexane/ $i$ -PrOH = 95:5, 1.0 mL/min, 25 °C, 254 nm;  $t_R = 13.48$  min (major) and 15.62 min (minor).

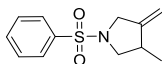

**3-methyl-4-methylene-1-(phenylsulfonyl)pyrrolidine (3b').** Colorless oil, 83% yield. 91% ee.  $[\alpha]_{\text{D}}^{25} = 23.9$  ( $c = 0.5$ ,  $\text{CH}_2\text{Cl}_2$ ).  $^1\text{H NMR}$  (400 MHz,  $\text{CDCl}_3$ )  $\delta$  7.87-7.81 (m, 2H), 7.65-7.60 (m, 1H), 7.59-7.52 (m, 2H), 4.93-4.91 (m, 1H), 4.87-4.86 (m, 1H), 3.98 (d,  $J = 15.2$  Hz, 1H), 3.79-3.74 (m, 1H), 3.67-3.56 (m, 1H), 2.78-2.61 (m, 2H), 1.05 (d,  $J = 6.4$  Hz, 3H).  $^{13}\text{C NMR}$  (100 MHz,  $\text{CDCl}_3$ )  $\delta$  149.1, 135.8, 132.8, 129.0, 127.7, 106.1, 55.0, 52.1, 37.4, 16.0. HRMS (ESI)  $m/z$  calcd for  $\text{C}_{12}\text{H}_{16}\text{NO}_2\text{S}$ ,  $[\text{M} + \text{H}]^+ = 238.0896$ , found: 238.0891. The ee of **3b'** was determined by HPLC

analysis using Daicel Chiralcel AD-H column (25 cm × 0.46 cm ID), conditions: *n*-hexane/*i*-PrOH = 95:5, 1.0 mL/min, 25 °C, 254 nm; *t*R = 12.81 min (major) and 14.57 min (minor).

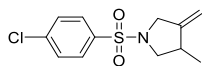

**1-((4-chlorophenyl)sulfonyl)-3-methyl-4-methylenepyrrolidine (3c')**. White solid, 90% yield. mp: 94.5-95.5 °C, 92% ee.  $[\alpha]_D^{25} = 20.3$  ( $c = 0.5$ , CH<sub>2</sub>Cl<sub>2</sub>). <sup>1</sup>H NMR (400 MHz, CDCl<sub>3</sub>) δ 7.78 (d,  $J = 8.4$  Hz, 2H), 7.53 (d,  $J = 8.8$  Hz, 2H), 4.95-4.93 (m, 1H), 4.90-4.89 (m, 1H), 3.98 (dt,  $J = 14.0, 2.4$  Hz, 1H), 3.78-3.73 (m, 1H), 3.64-3.57 (m, 1H), 2.98-2.37 (m, 2H), 1.07 (d,  $J = 6.4$  Hz, 3H). <sup>13</sup>C NMR (100 MHz, CDCl<sub>3</sub>) δ 148.7, 139.3, 134.5, 129.4, 129.1, 106.4, 55.0, 52.1, 37.4, 15.9. HRMS (ESI)  $m/z$  calcd for C<sub>12</sub>H<sub>15</sub>ClNO<sub>2</sub>S,  $[M + H]^+ = 272.0507$ , found: 272.0504. The ee of **3c'** was determined by HPLC analysis using Daicel Chiralcel AD-H column (25 cm × 0.46 cm ID), conditions: *n*-hexane/*i*-PrOH = 95:5, 1.0 mL/min, 25 °C, 254 nm; *t*R = 13.28 min (major) and 16.56 min (minor).

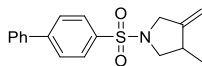

**1-([1,1'-biphenyl]-4-ylsulfonyl)-3-methyl-4-methylenepyrrolidine (3d')**. White solid, 79% yield. mp: 99.5-101.2 °C, 91% ee.  $[\alpha]_D^{25} = 17.1$  ( $c = 0.5$ , CH<sub>2</sub>Cl<sub>2</sub>). <sup>1</sup>H NMR (400 MHz, CDCl<sub>3</sub>) δ 7.90 (d,  $J = 8.8$  Hz, 2H), 7.76 (d,  $J = 8.4$  Hz, 2H), 7.66-7.61 (m, 2H), 7.53-7.47 (m, 2H), 7.46-7.41 (m, 1H), 4.95-4.93 (m, 1H), 4.90-4.89 (m, 1H), 4.04-3.99 (m, 1H), 3.84-3.79 (m, 1H), 3.67-3.61 (m, 1H), 2.80-2.65 (m, 2H), 1.08 (d,  $J = 6.4$  Hz, 3H). <sup>13</sup>C NMR (100 MHz, CDCl<sub>3</sub>) δ 149.1, 145.6, 139.2, 134.4, 130.3, 129.0, 128.5, 128.2, 127.6, 127.3, 106.2, 55.1, 52.2, 37.5, 16.0. HRMS (ESI)  $m/z$  calcd for C<sub>18</sub>H<sub>20</sub>NO<sub>2</sub>S,  $[M + H]^+ = 314.1209$ , found: 314.1202. The ee of **3d'** was determined by HPLC analysis using Daicel Chiralcel AD-H column (25 cm × 0.46 cm ID), conditions: *n*-hexane/*i*-PrOH = 95:5, 1.0 mL/min, 25 °C, 254 nm; *t*R = 13.13 min (major) and 14.66 min (minor).

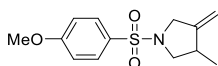

**1-((4-methoxyphenyl)sulfonyl)-3-methyl-4-methylenepyrrolidine (3e')**. White solid, 75% yield. mp: 57.6-58.4 °C, 91% ee.  $[\alpha]_D^{25} = 9.9$  ( $c = 0.25$ , CH<sub>2</sub>Cl<sub>2</sub>). <sup>1</sup>H NMR (400 MHz, CDCl<sub>3</sub>) δ 7.77 (d,  $J = 9.2$  Hz, 2H), 7.02 (d,  $J = 8.8$  Hz, 2H), 4.92-4.90 (m, 1H), 4.87-4.85 (m, 1H), 3.96 (d,  $J = 14.0$  Hz, 1H), 3.89 (s, 3H), 3.84-3.67 (m, 1H), 3.65-3.40 (m, 1H), 2.82-2.32 (m, 2H), 1.06 (d,  $J = 6.0$  Hz, 3H). <sup>13</sup>C NMR (100 MHz, CDCl<sub>3</sub>) δ 163.0, 149.3, 129.8, 127.4, 114.2, 106.0, 55.6, 55.1, 52.2, 37.4, 16.1. HRMS (ESI)  $m/z$  calcd for C<sub>13</sub>H<sub>18</sub>NO<sub>3</sub>S,  $[M + H]^+ = 268.1002$ , found: 268.1005. The ee of **3e'** was determined by HPLC analysis using Daicel Chiralcel AD-H column (25 cm × 0.46 cm ID), conditions: *n*-hexane/*i*-PrOH = 93:7, 0.8 mL/min, 25 °C, 254 nm; *t*R = 27.18 min (major) and 30.87 min (minor).

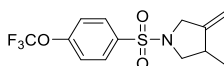

**3-methyl-4-methylene-1-((4-(trifluoromethoxy)phenyl)sulfonyl)pyrrolidine (3f')**. White solid, 80% yield. mp: 71.2-72.1 °C, 91% ee.  $[\alpha]_D^{25} = 13.3$  ( $c = 0.5$ , CH<sub>2</sub>Cl<sub>2</sub>). <sup>1</sup>H NMR (400 MHz, CDCl<sub>3</sub>) δ 7.89 (d,  $J = 8.8$  Hz, 2H), 7.38 (d,  $J = 8.0$  Hz, 2H), 4.96-4.94 (m, 1H), 4.91-4.90 (m, 1H), 3.97-3.40 (m, 1H), 3.81-3.76 (m, 1H), 3.64-3.59 (m, 1H), 2.85-2.63 (m, 2H), 1.08 (d,  $J = 6.0$  Hz, 3H). <sup>13</sup>C NMR (100 MHz, CDCl<sub>3</sub>) δ 152.2, 148.7, 134.5, 129.7, 120.9, 120.2 (q,  $J = 258.0$  Hz), 106.4, 55.0, 52.1, 37.5, 16.0. <sup>19</sup>F NMR (376 MHz, CDCl<sub>3</sub>) δ -57.68. HRMS (ESI)  $m/z$  calcd for C<sub>13</sub>H<sub>15</sub>F<sub>3</sub>NO<sub>3</sub>S,  $[M + H]^+ = 322.0719$ , found: 322.0714. The ee of **3f'** was determined by HPLC analysis using Daicel Chiralcel AD-H column (25 cm × 0.46 cm ID), conditions: *n*-hexane/*i*-PrOH = 95:5, 1 mL/min, 25 °C, 254 nm; *t*R = 9.04 min (major) and 9.95 min (minor).

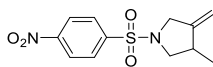

**3-methyl-4-methylene-1-((4-nitrophenyl)sulfonyl)pyrrolidine (3g')**. White solid, 82% yield. mp: 150.8-151.7 °C, 88% ee.  $[\alpha]_D^{25} = 21.6$  ( $c = 0.5$ , CH<sub>2</sub>Cl<sub>2</sub>). <sup>1</sup>H NMR (400 MHz, CDCl<sub>3</sub>) δ 7.78 (d,  $J = 8.4$  Hz, 2H), 7.53 (d,  $J = 8.8$  Hz, 2H), 4.95-4.93 (m, 1H), 4.90-4.89 (m, 1H), 3.98 (dt,  $J = 14.0, 2.4$  Hz, 1H), 3.78-3.73 (m, 1H), 3.64-3.57 (m, 1H), 2.98-2.37 (m, 2H), 1.07 (d,  $J = 6.4$  Hz, 3H). <sup>13</sup>C NMR (100 MHz, CDCl<sub>3</sub>) δ 150.2, 148.1, 142.1, 128.7, 124.4, 106.8, 55.0, 52.1, 37.5, 15.8. HRMS (ESI)  $m/z$  calcd for C<sub>12</sub>H<sub>15</sub>N<sub>2</sub>O<sub>4</sub>S,  $[M + H]^+ = 283.0747$ , found: 283.0741. The ee of **3g'**

was determined by HPLC analysis using Daicel Chiralcel AD-H column (25 cm × 0.46 cm ID), conditions: *n*-hexane/*i*-PrOH = 90:10, 1 mL/min, 25 °C, 254 nm; *t*R = 17.58 min (major) and 22.29 min (minor).

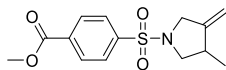

**methyl 4-((3-methyl-4-methylenepyrrolidin-1-yl)sulfonyl)benzoate (3h')**. White solid, 68% yield. mp: 109.4-111.3 °C, 88% ee.  $[\alpha]_{\text{D}}^{25} = 25.1$  ( $c = 0.5$ , CH<sub>2</sub>Cl<sub>2</sub>). <sup>1</sup>H NMR (400 MHz, CDCl<sub>3</sub>) δ 8.20 (d,  $J = 8.8$  Hz, 2H), 7.89 (d,  $J = 8.8$  Hz, 2H), 4.92-4.91 (m, 1H), 4.87-4.86 (m, 1H), 4.00-3.96 (m, 1H), 3.96 (s, 3H), 3.74-3.79 (m, 1H), 3.59-3.63 (m, 1H), 2.65-2.73 (m, 2H), 1.04 (d,  $J = 6.4$  Hz, 3H). <sup>13</sup>C NMR (100 MHz, CDCl<sub>3</sub>) δ 165.6, 148.6, 139.9, 133.9, 130.2, 127.6, 106.4, 55.0, 52.6, 52.1, 37.4, 15.9. HRMS (ESI)  $m/z$  calcd for C<sub>14</sub>H<sub>18</sub>NO<sub>4</sub>S,  $[M + H]^+ = 296.0951$ , found: 296.0948. The ee of **3h'** was determined by HPLC analysis using Daicel Chiralcel AD-H column (25 cm × 0.46 cm ID), conditions: *n*-hexane/*i*-PrOH = 95:5, 1 mL/min, 25 °C, 254 nm; *t*R = 14.59 min (major) and 16.82 min (minor).

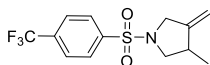

**3-methyl-4-methylene-1-((4-(trifluoromethyl)phenyl)sulfonyl)pyrrolidine (3i')**. White solid, 63% yield. mp: 124.7-126.3 °C, 91% ee.  $[\alpha]_{\text{D}}^{25} = 20.5$  ( $c = 0.5$ , CH<sub>2</sub>Cl<sub>2</sub>). <sup>1</sup>H NMR (400 MHz, CDCl<sub>3</sub>) δ 7.97 (d,  $J = 8.0$  Hz, 2H), 7.83 (d,  $J = 8.4$  Hz, 2H), 4.97-4.95 (m, 1H), 4.91-4.89 (m, 1H), 4.03-3.98 (m, 1H), 3.82-3.77 (m, 1H), 3.68-3.60 (m, 1H), 2.78-2.67 (m, 2H), 1.08 (d,  $J = 6.4$  Hz, 3H). <sup>13</sup>C NMR (100 MHz, CDCl<sub>3</sub>) δ 148.5, 134.5 (q,  $J = 32.9$  Hz), 128.1, 126.2 (q,  $J = 3.7$  Hz), 123.2 (q,  $J = 271.4$ ), 106.5, 55.0, 52.1, 37.5, 15.9. <sup>19</sup>F NMR (376 MHz, CDCl<sub>3</sub>) δ -62.79. HRMS (ESI)  $m/z$  calcd for C<sub>13</sub>H<sub>15</sub>F<sub>3</sub>NO<sub>2</sub>S,  $[M + H]^+ = 306.0770$ , found: 306.0774. The ee of **3i'** was determined by HPLC analysis using Daicel Chiralcel AD-H column (25 cm × 0.46 cm ID), conditions: *n*-hexane/*i*-PrOH = 95:5, 1 mL/min, 25 °C, 254 nm; *t*R = 9.15 min (major) and 10.26 min (minor).

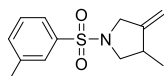

**3-methyl-4-methylene-1-(m-tolylsulfonyl)pyrrolidine (3j')**. White solid, 84% yield. mp: 63.1-64.3 °C, 90% ee.  $[\alpha]_{\text{D}}^{25} = 25.5$  ( $c = 0.25$ , CH<sub>2</sub>Cl<sub>2</sub>). <sup>1</sup>H NMR (400 MHz, CDCl<sub>3</sub>) δ 7.63 (d,  $J = 8.0$  Hz, 2H), 7.43 (d,  $J = 5.6$  Hz, 2H), 4.93-4.91 (m, 1H), 4.89-4.87 (m, 1H), 3.99-3.95 (m, 1H), 3.79-3.74 (m, 1H), 3.64-3.56 (m, 1H), 2.75-2.64 (m, 2H), 2.45 (s, 3H), 1.06 (d,  $J = 6.4$  Hz, 3H). <sup>13</sup>C NMR (100 MHz, CDCl<sub>3</sub>) δ 149.2, 139.2, 135.6, 133.6, 128.9, 128.0, 124.9, 106.0, 55.0, 52.1, 37.4, 21.4, 16.0. HRMS (ESI)  $m/z$  calcd for C<sub>13</sub>H<sub>18</sub>NO<sub>2</sub>S,  $[M + H]^+ = 252.1053$ , found: 252.1055. The ee of **3j'** was determined by HPLC analysis using Daicel Chiralcel AD-H column (25 cm × 0.46 cm ID), conditions: *n*-hexane/*i*-PrOH = 98:2, 0.5 mL/min, 25 °C, 254 nm; *t*R = 26.57 min (major) and 28.51 min (minor).

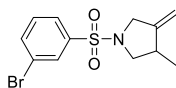

**1-((3-bromophenyl)sulfonyl)-3-methyl-4-methylenepyrrolidine (3k')**. White solid, 76% yield. mp: 53.5-54.1 °C, 92% ee.  $[\alpha]_{\text{D}}^{25} = 14.5$  ( $c = 0.5$ , CH<sub>2</sub>Cl<sub>2</sub>). <sup>1</sup>H NMR (400 MHz, CDCl<sub>3</sub>) δ 7.98 (t,  $J = 2.0$  Hz, 1H), 7.79-7.73 (m, 2H), 7.44 (t,  $J = 8.0$  Hz, 1H), 4.96-4.95 (m, 1H), 4.91-4.90 (m, 1H), 4.01-3.96 (m, 1H), 3.81-3.76 (m, 1H), 3.65-3.58 (m, 1H), 2.77-2.67 (m, 2H), 1.08 (d,  $J = 6.4$  Hz, 3H). <sup>13</sup>C NMR (100 MHz, CDCl<sub>3</sub>) δ 148.7, 137.9, 135.8, 130.6, 130.4, 126.1, 123.2, 106.4, 55.0, 52.1, 37.5, 16.0. HRMS (ESI)  $m/z$  calcd for C<sub>12</sub>H<sub>15</sub>BrNO<sub>2</sub>S,  $[M + H]^+ = 316.0001$  found: 316.0008. The ee of **3k'** was determined by HPLC analysis using Daicel Chiralcel AD-H column (25 cm × 0.46 cm ID), conditions: *n*-hexane/*i*-PrOH = 99:1, 0.5 mL/min, 25 °C, 254 nm; *t*R = 45.63 min (major) and 50.01 min (minor).

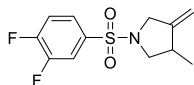

**1-((3,4-difluorophenyl)sulfonyl)-3-methyl-4-methylenepyrrolidine (3l')**. White solid, 79% yield. mp: 92.3-93.5 °C, 90% ee.  $[\alpha]_{\text{D}}^{25} = 14.9$  ( $c = 0.5$ , CH<sub>2</sub>Cl<sub>2</sub>). <sup>1</sup>H NMR (400 MHz, CDCl<sub>3</sub>) δ 7.71-7.66 (m, 1H), 7.65-7.60 (m, 1H), 7.39-

7.33 (m, 1H), 4.96-4.94 (m, 1H), 4.92-4.90 (m, 1H), 4.01-3.96 (m, 1H), 3.80-3.75 (m, 1H), 3.66-3.57 (m, 1H), 2.77-2.68 (m, 2H), 1.09 (d,  $J = 6.4$  Hz, 3H).  $^{13}\text{C}$  NMR (100 MHz,  $\text{CDCl}_3$ )  $\delta$  153.2 (dd,  $J = 255.7, 12.6$  Hz), 150.2 (dd,  $J = 253.2, 13.1$  Hz), 148.5, 133.0, 124.7 (dd,  $J = 7.4, 4.0$  Hz), 118.2 (d,  $J = 18.1$  Hz), 117.5 (dd,  $J = 19.3, 1.7$  Hz), 55.0, 52.1, 37.5, 15.9.  $^{19}\text{F}$  NMR (376 MHz,  $\text{CDCl}_3$ )  $\delta$  -129.37 (d,  $J = 20.4$  Hz), -133.55 (d,  $J = 20.9$  Hz). HRMS (ESI)  $m/z$  calcd for  $\text{C}_{12}\text{H}_{14}\text{F}_2\text{NO}_2\text{S}$ ,  $[\text{M} + \text{H}]^+ = 274.0708$ , found: 274.0712. The ee of **3l'** was determined by HPLC analysis using Daicel Chiralcel AD-H column (25 cm  $\times$  0.46 cm ID), conditions: *n*-hexane/*i*-PrOH = 97:3, 0.8 mL/min, 25  $^\circ\text{C}$ , 254 nm;  $t_R = 14.71$  min (major) and 18.39 min (minor).

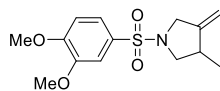

**1-((3,4-dimethoxyphenyl)sulfonyl)-3-methyl-4-methylenepyrrolidine (3m')**. White solid, 86% yield. mp: 84.3-85.6  $^\circ\text{C}$ , 90% ee.  $[\alpha]_{\text{D}}^{25} = 10.5$  ( $c = 0.5$ ,  $\text{CH}_2\text{Cl}_2$ ).  $^1\text{H}$  NMR (400 MHz,  $\text{CDCl}_3$ )  $\delta$  7.43 (dd,  $J = 8.4, 2.4$  Hz, 1H), 7.27 (d,  $J = 2.4$  Hz, 1H), 6.97 (d,  $J = 8.4$  Hz, 1H), 4.92-4.90 (m, 1H), 4.87-4.85 (m, 1H), 4.01-3.96 (m, 1H), 3.95 (s, 3H), 3.94 (s, 3H), 3.76-3.71 (m, 1H), 3.60-3.53 (m, 1H), 2.73-2.62 (m, 2H), 1.05 (d,  $J = 6.0$  Hz, 3H).  $^{13}\text{C}$  NMR (100 MHz,  $\text{CDCl}_3$ )  $\delta$  152.6, 149.2, 149.0, 127.5, 121.6, 110.6, 110.2, 106.0, 56.2, 56.1, 55.1, 52.2, 37.4, 16.1. HRMS (ESI)  $m/z$  calcd for  $\text{C}_{14}\text{H}_{20}\text{NO}_4\text{S}$ ,  $[\text{M} + \text{H}]^+ = 298.1108$ , found: 298.1105. The ee of **3m'** was determined by HPLC analysis using Daicel Chiralcel AD-H column (25 cm  $\times$  0.46 cm ID), conditions: *n*-hexane/*i*-PrOH = 93:7, 0.8 mL/min, 25  $^\circ\text{C}$ , 254 nm;  $t_R = 27.18$  min (major) and 30.87 min (minor).

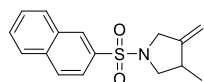

**3-methyl-4-methylene-1-(naphthalen-2-ylsulfonyl)pyrrolidine (3n')**. White solid, 70% yield. mp: 63.2-64.3  $^\circ\text{C}$ , 86% ee.  $[\alpha]_{\text{D}}^{25} = 27.1$  ( $c = 0.5$ ,  $\text{CH}_2\text{Cl}_2$ ).  $^1\text{H}$  NMR (400 MHz,  $\text{CDCl}_3$ )  $\delta$  8.42 (d,  $J = 1.6$  Hz, 1H), 8.06-7.98 (m, 2H), 7.94 (dd,  $J = 7.2, 1.6$  Hz, 1H), 7.84 (dd,  $J = 8.4, 1.6$  Hz, 1H), 7.71-7.61 (m, 2H), 4.92-4.90 (m, 1H), 4.86-4.84 (m, 1H), 4.07-4.02 (m, 1H), 3.86-3.81 (m, 1H), 3.70-3.66 (m, 1H), 2.78 (t,  $J = 8.8$  Hz, 1H), 2.74-2.63 (m, 1H), 1.04 (d,  $J = 6.4$  Hz, 3H).  $^{13}\text{C}$  NMR (100 MHz,  $\text{CDCl}_3$ )  $\delta$  149.0, 134.9, 133.0, 132.2, 129.3, 129.2, 129.0, 128.8, 127.9, 127.5, 123.1, 106.1, 55.1, 52.2, 37.5, 16.0. HRMS (ESI)  $m/z$  calcd for  $\text{C}_{16}\text{H}_{18}\text{NO}_2\text{S}$ ,  $[\text{M} + \text{H}]^+ = 288.1053$ , found: 288.1058. The ee of **3n'** was determined by HPLC analysis using Daicel Chiralcel AD-H column (25 cm  $\times$  0.46 cm ID), conditions: *n*-hexane/*i*-PrOH = 95:5, 1.0 mL/min, 25  $^\circ\text{C}$ , 254 nm;  $t_R = 10.44$  min (major) and 11.28 min (minor).

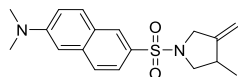

***N,N*-dimethyl-6-((3-methyl-4-methylenepyrrolidin-1-yl)sulfonyl)naphthalen-2-amine (3o')**. Yellow oil, 77% yield. 88% ee.  $[\alpha]_{\text{D}}^{25} = 23.5$  ( $c = 0.5$ ,  $\text{CH}_2\text{Cl}_2$ ).  $^1\text{H}$  NMR (400 MHz,  $\text{CDCl}_3$ )  $\delta$  8.57 (dd,  $J = 8.8, 1.2$  Hz, 1H), 8.49 (d,  $J = 8.8$  Hz, 1H), 8.24 (dd,  $J = 7.2, 1.2$  Hz, 1H), 7.58-7.53 (m, 2H), 7.20 (dd,  $J = 7.6, 1.2$  Hz, 1H), 4.92-4.90 (m, 1H), 4.89-4.87 (m, 1H), 4.07-4.02 (m, 1H), 3.94-3.89 (m, 1H), 3.72-3.67 (m, 1H), 2.92 (t,  $J = 8.8$  Hz, 1H), 2.90 (s, 6H), 2.82-2.70 (m, 1H), 1.07 (d,  $J = 6.4$  Hz, 3H).  $^{13}\text{C}$  NMR (100 MHz,  $\text{CDCl}_3$ )  $\delta$  151.6, 149.4, 133.3, 130.6, 130.5, 130.1, 130.0, 128.0, 123.2, 119.7, 115.2, 105.9, 54.6, 51.7, 45.4, 37.8, 16.0. HRMS (ESI)  $m/z$  calcd for  $\text{C}_{18}\text{H}_{23}\text{N}_2\text{O}_2\text{S}$ ,  $[\text{M} + \text{H}]^+ = 331.1475$ , found: 335.1471. The ee of **3o'** was determined by HPLC analysis using Daicel Chiralcel AD-H column (25 cm  $\times$  0.46 cm ID), conditions: *n*-hexane/*i*-PrOH = 98:2, 1.0 mL/min, 25  $^\circ\text{C}$ , 254 nm;  $t_R = 37.15$  min (major) and 39.73 min (minor).

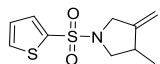

**3-methyl-4-methylene-1-(thiophen-2-ylsulfonyl)pyrrolidine (3p')**. White solid, 82% yield. mp: 58.6-59.4  $^\circ\text{C}$ , 89% ee.  $[\alpha]_{\text{D}}^{25} = 13.3$  ( $c = 0.5$ ,  $\text{CH}_2\text{Cl}_2$ ).  $^1\text{H}$  NMR (400 MHz,  $\text{CDCl}_3$ )  $\delta$  7.65-7.59 (m, 2H), 7.17 (dd,  $J = 5.2, 3.6$  Hz, 1H), 4.97-4.95 (m, 1H), 4.91-4.89 (m, 1H), 4.09-3.99 (m, 1H), 3.87-3.82 (m, 1H), 3.66-3.62 (m, 1H), 2.79 (t,  $J = 9.2$  Hz, 1H), 2.75-2.64 (m, 1H), 1.08 (d,  $J = 7.2$  Hz, 3H).  $^{13}\text{C}$  NMR (100 MHz,  $\text{CDCl}_3$ )  $\delta$  148.8, 135.9, 132.4, 132.0, 127.6, 106.3, 55.2, 52.3, 37.4, 16.0. HRMS (ESI)  $m/z$  calcd for  $\text{C}_{10}\text{H}_{14}\text{NO}_2\text{S}_2$ ,  $[\text{M} + \text{H}]^+ = 244.0460$ , found: 244.0463. The ee of **3p'** was determined by HPLC analysis using Daicel Chiralcel AD-H column (25 cm  $\times$  0.46 cm ID), conditions: *n*-



hexane/*i*-PrOH = 95:5, 1.0 mL/min, 25 °C, 254 nm; *t*R = 7.50 min (major) and 8.30 min (minor).

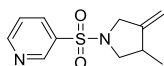

**3-((3-methyl-4-methylenepyrrolidin-1-yl)sulfonyl)pyridine (3q')**. White solid, 66% yield. mp: 53.3-54.5 °C, 86% ee.  $[\alpha]_D^{25} = 26.3$  ( $c = 0.25$ , CH<sub>2</sub>Cl<sub>2</sub>). <sup>1</sup>H NMR (400 MHz, CDCl<sub>3</sub>) δ 9.06 (s, 1H), 8.85 (d,  $J = 4.4$  Hz, 1H), 8.1-8.11 (m, 1H), 7.52 (dd,  $J = 8.0, 4.4$  Hz, 1H), 4.96-4.94 (m, 1H), 4.91-4.89 (m, 1H), 4.03-3.98 (m, 1H), 3.83-3.78 (m, 1H), 3.67-3.63 (m, 1H), 2.76 (t,  $J = 8.4$  Hz, 1H), 2.74-2.65 (m, 1H), 1.07 (d,  $J = 6.4$  Hz, 3H). <sup>13</sup>C NMR (100 MHz, CDCl<sub>3</sub>) δ 153.4, 148.4, 135.3, 132.9, 123.8, 106.6, 55.0, 52.0, 37.4, 15.9. HRMS (ESI)  $m/z$  calcd for C<sub>11</sub>H<sub>15</sub>N<sub>2</sub>O<sub>2</sub>S,  $[M + H]^+ = 239.0849$ , found: 239.0844. The ee of **3q'** was determined by HPLC analysis using Daicel Chiralcel AD-H column (25 cm × 0.46 cm ID), conditions: *n*-hexane/*i*-PrOH = 85:15, 1.0 mL/min, 25 °C, 254 nm; *t*R = 29.51 min (major) and 72.97 min (minor).

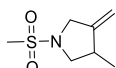

**3-methyl-4-methylene-1-(methylsulfonyl)pyrrolidine (3r')**. White solid, 52% yield. mp: 83.2-85.6 °C, 81% ee,  $[\alpha]_D^{25} = 42.3$  ( $c = 1.0$ , CH<sub>2</sub>Cl<sub>2</sub>). <sup>1</sup>H NMR (400 MHz, CDCl<sub>3</sub>) δ 5.03-5.01 (m, 1H), 4.99-4.97 (m, 1H), 4.08-4.03 (m, 1H), 3.95-3.90 (m, 1H), 3.69-3.65 (m, 1H), 2.88 (d,  $J = 8.8$  Hz, 1H), 2.83 (s, 3H), 2.9-2.83 (m, 1H), 1.16 (d,  $J = 6.4$  Hz, 3H). <sup>13</sup>C NMR (100 MHz, CDCl<sub>3</sub>) δ 149.0, 106.4, 54.9, 52.1, 37.8, 34.4, 15.9. HRMS (EI) Calcd for C<sub>7</sub>H<sub>14</sub>NO<sub>2</sub>S: 176.0740 Found: 176.0748. The ee of **3r'** was determined by HPLC analysis using Daicel Chiralcel AD-H column (25 cm × 0.46 cm ID), conditions: *n*-hexane/*i*-PrOH = 94:6, 1.0 mL/min, 25 °C, 254 nm; *t*R = 12.99 min (major) and 14.15 min (minor).

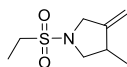

**1-(ethylsulfonyl)-3-methyl-4-methylenepyrrolidine (3s')**. Colorless oil, 55% yield. 87% ee,  $[\alpha]_D^{25} = 45.7$  ( $c = 1.0$ , CH<sub>2</sub>Cl<sub>2</sub>). <sup>1</sup>H NMR (400 MHz, CDCl<sub>3</sub>) δ 5.01 (d,  $J = 2.8$  Hz, 1H), 4.98-4.96 (m, 1H), 4.10-4.08 (m, 1H), 3.98 (d,  $J = 14.0$  Hz, 1H), 3.70 (t,  $J = 8.4$  Hz, 1H), 3.03 (q,  $J = 7.2$  Hz, 2H), 2.94 (t,  $J = 8.8$  Hz, 1H), 2.85-2.77 (m, 1H), 1.38 (t,  $J = 7.6$  Hz, 3H), 1.16 (d,  $J = 6.4$  Hz, 3H). <sup>13</sup>C NMR (100 MHz, CDCl<sub>3</sub>) δ 149.3, 106.1, 54.8, 52.0, 44.2, 37.9, 15.8, 7.9. HRMS (EI) Calcd for C<sub>8</sub>H<sub>16</sub>NO<sub>2</sub>S: 190.0896. Found: 190.0892. The ee of **3s'** was determined by HPLC analysis using Daicel Chiralcel AD-H column (25 cm × 0.46 cm ID), conditions: *n*-hexane/*i*-PrOH = 93:7, 1.0 mL/min, 25 °C, 254 nm; *t*R = 10.81 min (major) and 11.98 min (minor).

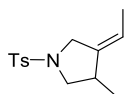

**1-(4-Toluenesulfonyl)-3-(Z)-ethylidene-4-methylpyrrolidine (3t')**: Colorless liquid, 85 % yield, 92% ee,  $[\alpha]_D^{25} = 26.8$  ( $c = 1.0$ , DCM). <sup>1</sup>H NMR (400 MHz, CDCl<sub>3</sub>) δ 7.64 (d,  $J = 8.2$  Hz, 2H), 7.25 (d,  $J = 8.0$  Hz, 2H), 5.18-5.09 (m, 2.4 Hz, 1H), 3.81-3.76 (m, 1H), 3.65-3.60 (m, 1H), 3.48-3.37 (m, 1H), 2.60-2.50 (m, 2H), 2.35 (s, 3H), 1.45 (dd,  $J = 6.8, 1.6$  Hz, 3H), 0.92 (d,  $J = 6.0$  Hz, 3H). <sup>13</sup>C NMR (101 MHz, CDCl<sub>3</sub>) δ 143.5, 140.4, 132.7, 129.6, 127.8, 116.0, 55.1, 49.7, 37.2, 21.5, 16.6, 14.4. HRMS (ESI)  $m/z$  Calcd for C<sub>14</sub>H<sub>20</sub>NO<sub>2</sub>S,  $[M + H]^+ = 266.1209$ . Found: 266.1205. The ee of **3t'** was determined by HPLC analysis using Daicel Chiralcel AD-H column (25 cm × 0.46 cm ID) conditions: *n*-hexane/*i*PrOH = 99/1, 0.5 mL/min, 25 °C, 254 nm; *t*R = 31.526 min (major) and 33.416 min (minor).

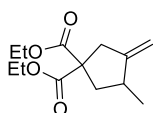

**4,4-Bis(ethoxycarbonyl)-1-methylidene-2-methyl-cyclopentane (3u')**. Colorless liquid, 55 % yield, 80% ee,  $[\alpha]_D^{25} = 1.2$  ( $c = -0.5$ , DCM). <sup>1</sup>H NMR (400 MHz, CDCl<sub>3</sub>) δ 4.84 (q,  $J = 2.4$  Hz, 1H), 4.73 (q,  $J = 2.4$  Hz, 1H), 4.14-4.08 (m, 4H), 2.98 (d,  $J = 16.8$  Hz, 1H), 2.92-2.80 (m, 1H), 2.57-2.42 (m, 2H), 1.73-1.64 (m, 1H), 1.17 (td,  $J = 7.2, 1.8$  Hz,

6H), 1.04 (d,  $J = 6.0$  Hz, 3H).  $^{13}\text{C}$  NMR (100 MHz,  $\text{CDCl}_3$ )  $\delta$  172.0, 171.9, 153.4, 105.4, 61.4, 58.2, 42.1, 40.5, 37.2, 17.9, 14.0. HRMS (ESI)  $m/z$  Calcd for  $\text{C}_{13}\text{H}_{21}\text{O}_4$ ,  $[\text{M} + \text{H}]^+ = 241.1434$ . Found: 241.1436. The ee of **3u'** was determined by HPLC analysis using Daicel Chiralcel OJ-H column (25 cm  $\times$  0.46 cm ID) + Chiralcel OJ-H column (25 cm  $\times$  0.46 cm ID), conditions: *n*-hexane/*i*PrOH = 99/1, 0.3 mL/min, 25  $^\circ\text{C}$ , 230 nm;  $t_R = 49.71$  min (minor) and 53.11 min (major).

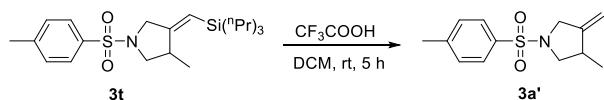

**1-(4-Toluenesulfonyl)-3-methylidene-4-methylpyrrolidine (3a')**. 75% yield. 83% ee.  $[\alpha]_{\text{D}^{25}} = 18.3$  ( $c = 0.5$ ,  $\text{CH}_2\text{Cl}_2$ ). The ee of **3a'** was determined by HPLC analysis using Daicel Chiralcel AD-H column (25 cm  $\times$  0.46 cm ID), conditions: *n*-hexane/*i*-PrOH = 95:5, 1.0 mL/min, 25  $^\circ\text{C}$ , 254 nm;  $t_R = 13.31$  min (major) and 15.34 min (minor).

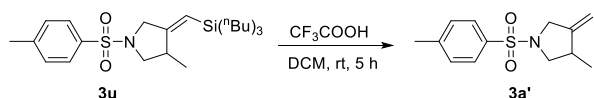

**1-(4-Toluenesulfonyl)-3-methylidene-4-methylpyrrolidine (3a')**. 70% yield. 75% ee.  $[\alpha]_{\text{D}^{25}} = 16.5$  ( $c = 0.5$ ,  $\text{CH}_2\text{Cl}_2$ ). The ee of **3a'** was determined by HPLC analysis using Daicel Chiralcel AD-H column (25 cm  $\times$  0.46 cm ID), conditions: *n*-hexane/*i*-PrOH = 95:5, 1.0 mL/min, 25  $^\circ\text{C}$ , 254 nm;  $t_R = 13.81$  min (major) and 15.91 min (minor).

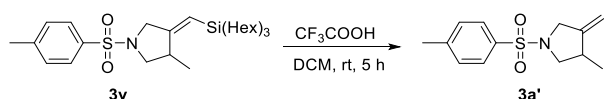

**1-(4-Toluenesulfonyl)-3-methylidene-4-methylpyrrolidine (3a')**. 80% yield. 72% ee.  $[\alpha]_{\text{D}^{25}} = 13.3$  ( $c = 0.5$ ,  $\text{CH}_2\text{Cl}_2$ ). The ee of **3a'** was determined by HPLC analysis using Daicel Chiralcel AD-H column (25 cm  $\times$  0.46 cm ID), conditions: *n*-hexane/*i*-PrOH = 95:5, 1.0 mL/min, 25  $^\circ\text{C}$ , 254 nm;  $t_R = 13.62$  min (major) and 15.66 min (minor).

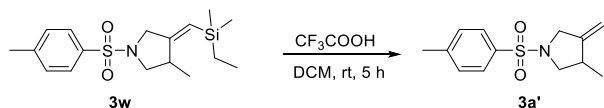

**1-(4-Toluenesulfonyl)-3-methylidene-4-methylpyrrolidine (3a')**. 80% yield. 84% ee.  $[\alpha]_{\text{D}^{25}} = 16.6$  ( $c = 0.5$ ,  $\text{CH}_2\text{Cl}_2$ ). The ee of **3a'** was determined by HPLC analysis using Daicel Chiralcel AD-H column (25 cm  $\times$  0.46 cm ID), conditions: *n*-hexane/*i*-PrOH = 95:5, 1.0 mL/min, 25  $^\circ\text{C}$ , 254 nm;  $t_R = 13.94$  min (major) and 16.15 min (minor).

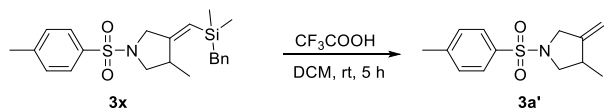

**1-(4-Toluenesulfonyl)-3-methylidene-4-methylpyrrolidine (3a')**. 83% yield. 90% ee.  $[\alpha]_{\text{D}^{25}} = 24.5$  ( $c = 0.5$ ,  $\text{CH}_2\text{Cl}_2$ ). The ee of **3a'** was determined by HPLC analysis using Daicel Chiralcel AD-H column (25 cm  $\times$  0.46 cm ID), conditions: *n*-hexane/*i*-PrOH = 95:5, 1.0 mL/min, 25  $^\circ\text{C}$ , 254 nm;  $t_R = 13.36$  min (major) and 15.49 min (minor).

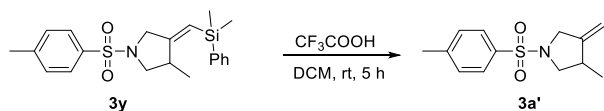

**1-(4-Toluenesulfonyl)-3-methylidene-4-methylpyrrolidine (3a')**. 63% yield. 90% ee.  $[\alpha]_{\text{D}^{25}} = 24.6$  ( $c = 0.5$ ,  $\text{CH}_2\text{Cl}_2$ ). The ee of **3a'** was determined by HPLC analysis using Daicel Chiralcel AD-H column (25 cm  $\times$  0.46 cm ID), conditions: *n*-hexane/*i*-PrOH = 95:5, 1.0 mL/min, 25  $^\circ\text{C}$ , 254 nm;  $t_R = 13.44$  min (major) and 15.49 min (minor).

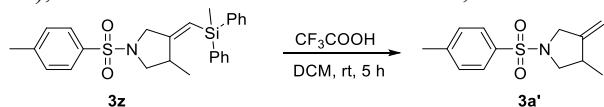

**1-(4-Toluenesulfonyl)-3-methylidene-4-methylpyrrolidine (3a')**. 60% yield. 91% ee.  $[\alpha]_{\text{D}^{25}} = 25.9$  ( $c = 0.5$ ,  $\text{CH}_2\text{Cl}_2$ ). The ee of **3a'** was determined by HPLC analysis using Daicel Chiralcel AD-H column (25 cm  $\times$  0.46 cm ID), conditions: *n*-hexane/*i*-PrOH = 95:5, 1.0 mL/min, 25  $^\circ\text{C}$ , 254 nm;  $t_R = 13.36$  min (major) and 15.49 min (minor).

ID), conditions: *n*-hexane/*i*-PrOH = 95:5, 1.0 mL/min, 25 °C, 254 nm; *t*R = 14.05 min (major) and 16.36 min (minor).

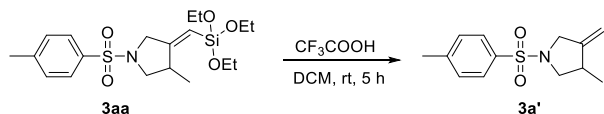

**1-(4-Toluenesulfonyl)-3-methylidene-4-methylpyrrolidine (3a')**. 75% yield. 90% ee.  $[\alpha]_{\text{D}}^{25} = 25.1$  ( $c = 0.5$ , CH<sub>2</sub>Cl<sub>2</sub>). The ee of **3aa** was determined by HPLC analysis using Daicel Chiralcel AD-H column (25 cm × 0.46 cm ID), conditions: *n*-hexane/*i*-PrOH = 90:10, 1.0 mL/min, 25 °C, 254 nm; *t*R = 9.33 min (major) and 10.54 min (minor).

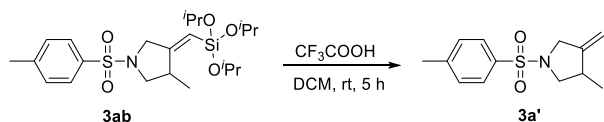

**1-(4-Toluenesulfonyl)-3-methylidene-4-methylpyrrolidine (3a')**. 85% yield. 92% ee.  $[\alpha]_{\text{D}}^{25} = 27.6$  ( $c = 0.5$ , CH<sub>2</sub>Cl<sub>2</sub>). The ee of **3a'** was determined by HPLC analysis using Daicel Chiralcel AD-H column (25 cm × 0.46 cm ID), conditions: *n*-hexane/*i*-PrOH = 95:5, 1.0 mL/min, 25 °C, 254 nm; *t*R = 13.49 min (major) and 15.54 min (minor).

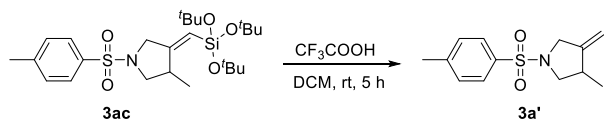

**1-(4-Toluenesulfonyl)-3-methylidene-4-methylpyrrolidine (3a')**. 82% yield. 92% ee.  $[\alpha]_{\text{D}}^{25} = 28.1$  ( $c = 0.5$ , CH<sub>2</sub>Cl<sub>2</sub>). The ee of **3a'** was determined by HPLC analysis using Daicel Chiralcel AD-H column (25 cm × 0.46 cm ID), conditions: *n*-hexane/*i*-PrOH = 95:5, 1.0 mL/min, 25 °C, 254 nm; *t*R = 13.41 min (major) and 15.51 min (minor).

## 9. X-ray Diffraction Analysis.

### 9.1. Crystal structure of L3.

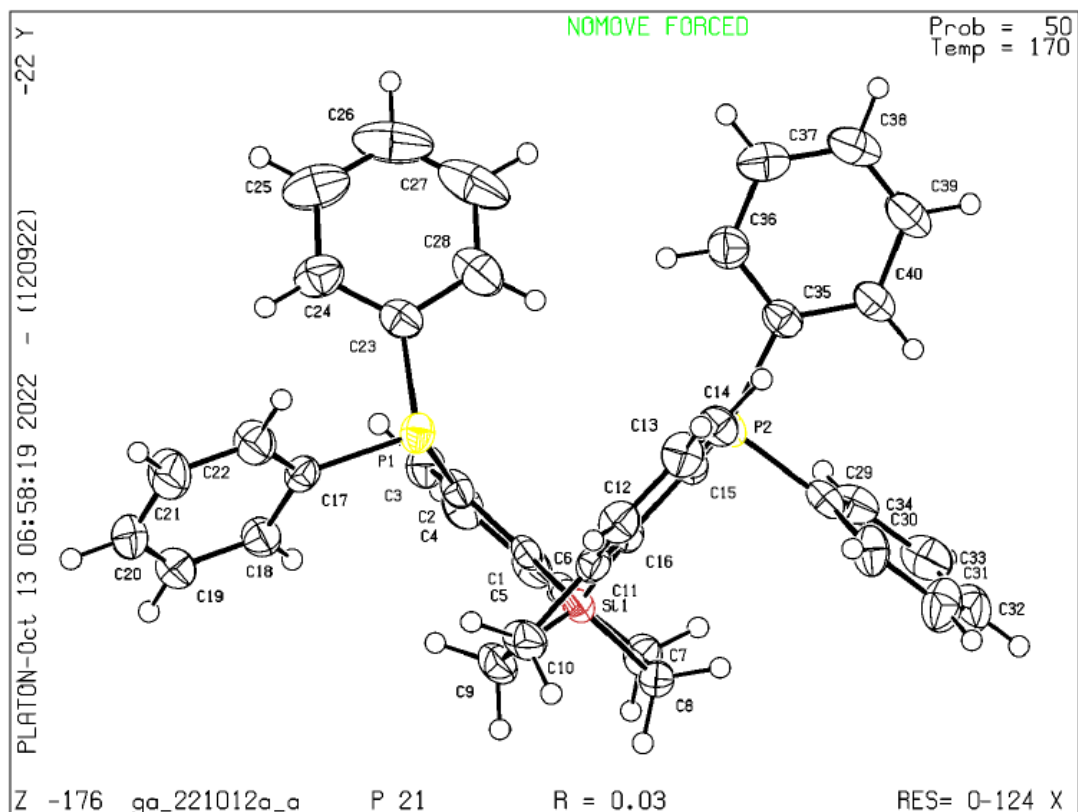

Table S4. Crystal data and structure refinement for ga\_221012a\_a.

|                        |                            |                  |
|------------------------|----------------------------|------------------|
| Identification code    | ga_221012a_a               |                  |
| Empirical formula      | C40 H34 P2 Si              |                  |
| Formula weight         | 604.70                     |                  |
| Temperature            | 170(2) K                   |                  |
| Wavelength             | 1.34139 Å                  |                  |
| Crystal system         | Monoclinic                 |                  |
| Space group            | P2 <sub>1</sub>            |                  |
| Unit cell dimensions   | a = 11.6462(5) Å           | α = 90°.         |
|                        | b = 8.7260(4) Å            | β = 108.620(2)°. |
|                        | c = 16.7421(8) Å           | γ = 90°.         |
| Volume                 | 1612.35(13) Å <sup>3</sup> |                  |
| Z                      | 2                          |                  |
| Density (calculated)   | 1.246 Mg/m <sup>3</sup>    |                  |
| Absorption coefficient | 1.163 mm <sup>-1</sup>     |                  |
| F(000)                 | 636                        |                  |

|                                   |                                             |
|-----------------------------------|---------------------------------------------|
| Crystal size                      | 0.100 x 0.060 x 0.050 mm <sup>3</sup>       |
| Theta range for data collection   | 4.841 to 53.898°.                           |
| Index ranges                      | -13<=h<=14, -10<=k<=10, -20<=l<=20          |
| Reflections collected             | 17268                                       |
| Independent reflections           | 5819 [R(int) = 0.0394]                      |
| Completeness to theta = 53.594°   | 99.6 %                                      |
| Absorption correction             | Semi-empirical from equivalents             |
| Max. and min. transmission        | 0.752 and 0.527                             |
| Refinement method                 | Full-matrix least-squares on F <sup>2</sup> |
| Data / restraints / parameters    | 5819 / 1 / 388                              |
| Goodness-of-fit on F <sup>2</sup> | 1.035                                       |
| Final R indices [I>2sigma(I)]     | R1 = 0.0316, wR2 = 0.0751                   |
| R indices (all data)              | R1 = 0.0355, wR2 = 0.0778                   |
| Absolute structure parameter      | 0.071(10)                                   |
| Extinction coefficient            | n/a                                         |
| Largest diff. peak and hole       | 0.210 and -0.155 e.Å <sup>-3</sup>          |

Table S5. Atomic coordinates ( $\times 10^4$ ) and equivalent isotropic displacement parameters ( $\text{\AA}^2 \times 10^3$ ) for ga\_221012a\_a.  $U(\text{eq})$  is defined as one third of the trace of the orthogonalized  $U^{\text{ij}}$  tensor.

|       | x       | y       | z       | $U(\text{eq})$ |
|-------|---------|---------|---------|----------------|
| P(1)  | 7079(1) | 6679(1) | 2173(1) | 31(1)          |
| P(2)  | 3866(1) | 5185(1) | 3055(1) | 32(1)          |
| Si(1) | 4553(1) | 4355(1) | 1225(1) | 29(1)          |
| C(1)  | 6045(2) | 3765(3) | 1995(2) | 28(1)          |
| C(2)  | 7123(2) | 4594(3) | 2346(2) | 30(1)          |
| C(3)  | 8149(3) | 3837(4) | 2856(2) | 37(1)          |
| C(4)  | 8109(3) | 2276(4) | 3020(2) | 40(1)          |
| C(5)  | 7043(3) | 1471(3) | 2689(2) | 37(1)          |
| C(6)  | 6006(3) | 2194(3) | 2176(2) | 31(1)          |
| C(7)  | 4806(3) | 1376(3) | 1820(2) | 41(1)          |
| C(8)  | 3862(3) | 2386(3) | 1190(2) | 36(1)          |
| C(9)  | 4627(3) | 5170(4) | 199(2)  | 40(1)          |
| C(10) | 3770(3) | 6542(4) | -18(2)  | 41(1)          |
| C(11) | 3361(2) | 7003(3) | 721(2)  | 31(1)          |
| C(12) | 2720(3) | 8336(3) | 723(2)  | 35(1)          |
| C(13) | 2350(3) | 8706(4) | 1402(2) | 40(1)          |
| C(14) | 2650(3) | 7752(3) | 2104(2) | 36(1)          |
| C(15) | 3318(2) | 6423(3) | 2127(2) | 29(1)          |
| C(16) | 3682(2) | 6034(3) | 1431(2) | 27(1)          |
| C(17) | 8042(2) | 6980(3) | 1507(2) | 30(1)          |
| C(18) | 8581(3) | 5828(4) | 1188(2) | 37(1)          |
| C(19) | 9228(3) | 6147(4) | 646(2)  | 42(1)          |
| C(20) | 9346(3) | 7638(4) | 407(2)  | 47(1)          |
| C(21) | 8812(3) | 8811(4) | 717(2)  | 53(1)          |
| C(22) | 8167(3) | 8490(4) | 1259(2) | 44(1)          |
| C(23) | 8054(3) | 7314(3) | 3214(2) | 36(1)          |
| C(24) | 9180(3) | 7988(4) | 3380(2) | 49(1)          |
| C(25) | 9805(4) | 8497(5) | 4193(3) | 72(1)          |
| C(26) | 9323(5) | 8313(6) | 4828(2) | 83(2)          |
| C(27) | 8226(6) | 7624(6) | 4676(3) | 82(2)          |
| C(28) | 7586(4) | 7142(4) | 3873(2) | 58(1)          |
| C(29) | 2693(3) | 3702(3) | 2866(2) | 34(1)          |

|       |         |         |         |       |
|-------|---------|---------|---------|-------|
| C(30) | 1547(3) | 3828(4) | 2275(2) | 43(1) |
| C(31) | 723(3)  | 2640(4) | 2161(3) | 53(1) |
| C(32) | 1019(3) | 1312(4) | 2635(2) | 52(1) |
| C(33) | 2147(4) | 1180(4) | 3223(2) | 52(1) |
| C(34) | 2989(3) | 2352(4) | 3331(2) | 44(1) |
| C(35) | 3582(3) | 6346(3) | 3890(2) | 33(1) |
| C(36) | 4276(3) | 7655(4) | 4161(2) | 43(1) |
| C(37) | 4189(3) | 8497(4) | 4843(2) | 50(1) |
| C(38) | 3420(4) | 8026(5) | 5266(2) | 55(1) |
| C(39) | 2728(4) | 6750(5) | 5009(2) | 58(1) |
| C(40) | 2791(3) | 5910(4) | 4319(2) | 46(1) |

---

## 9.2. Crystal structure of L3-PdCl<sub>2</sub>

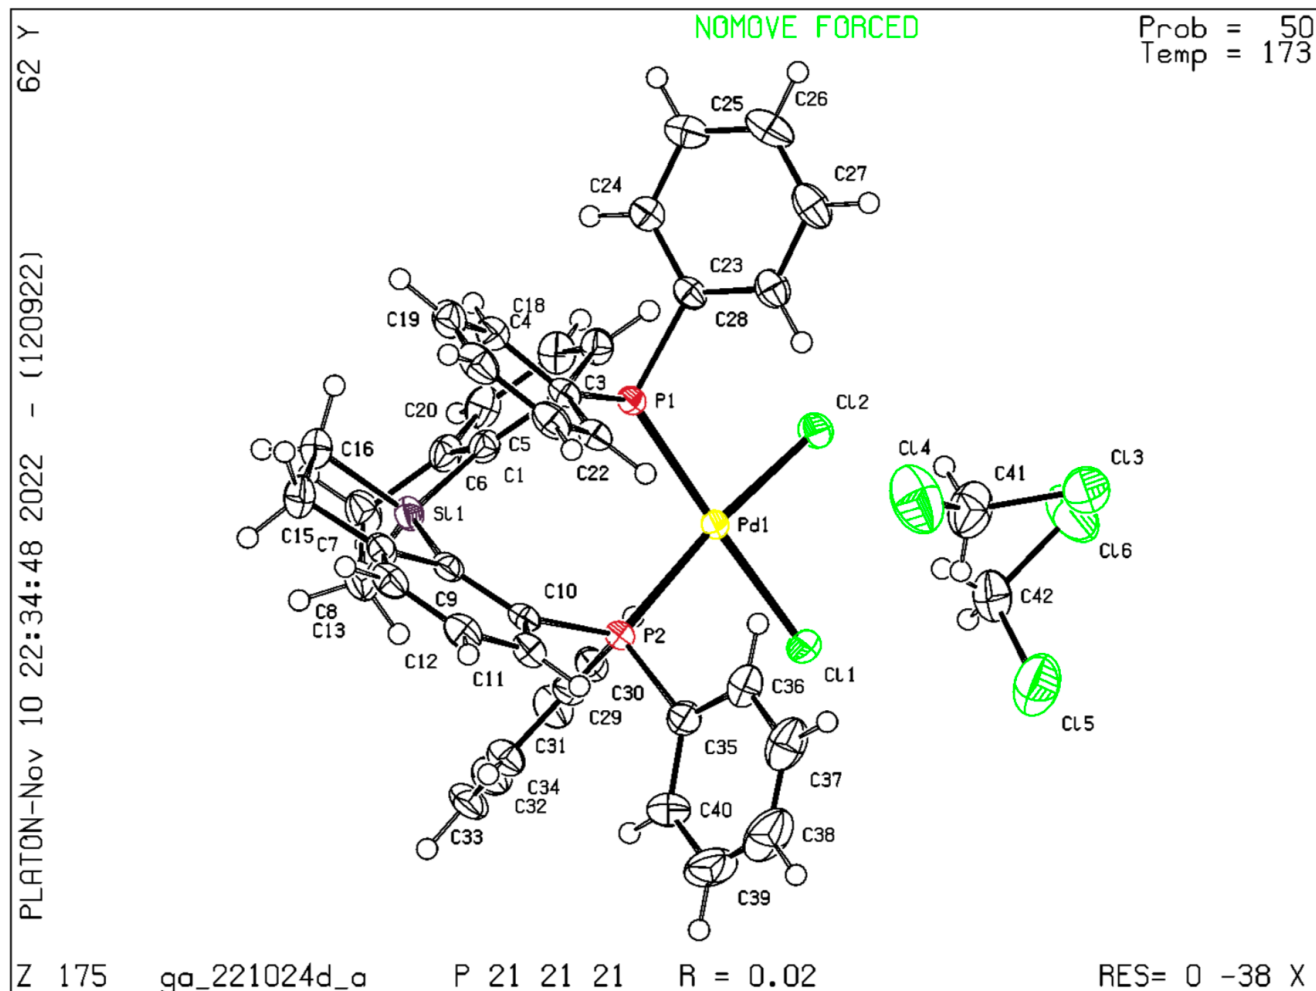

Table S5. Crystal data and structure refinement for ga\_221024d\_a.

|                        |                                               |          |
|------------------------|-----------------------------------------------|----------|
| Identification code    | ga_221024d_a                                  |          |
| Empirical formula      | C42 H38 Cl6 P2 Pd Si                          |          |
| Formula weight         | 951.85                                        |          |
| Temperature            | 173(2) K                                      |          |
| Wavelength             | 1.34139 Å                                     |          |
| Crystal system         | Orthorhombic                                  |          |
| Space group            | P2 <sub>1</sub> 2 <sub>1</sub> 2 <sub>1</sub> |          |
| Unit cell dimensions   | a = 9.9943(14) Å                              | a = 90°. |
|                        | b = 20.420(3) Å                               | b = 90°. |
|                        | c = 20.447(3) Å                               | g = 90°. |
| Volume                 | 4172.9(10) Å <sup>3</sup>                     |          |
| Z                      | 4                                             |          |
| Density (calculated)   | 1.515 Mg/m <sup>3</sup>                       |          |
| Absorption coefficient | 5.600 mm <sup>-1</sup>                        |          |



|                                   |                                             |
|-----------------------------------|---------------------------------------------|
| F(000)                            | 1928                                        |
| Crystal size                      | 0.270 x 0.140 x 0.040 mm <sup>3</sup>       |
| Theta range for data collection   | 4.207 to 57.489°.                           |
| Index ranges                      | -12<=h<=12, -25<=k<=25, -25<=l<=25          |
| Reflections collected             | 29824                                       |
| Independent reflections           | 8649 [R(int) = 0.0259]                      |
| Completeness to theta = 53.594°   | 99.9 %                                      |
| Absorption correction             | Semi-empirical from equivalents             |
| Max. and min. transmission        | 0.805 and 0.502                             |
| Refinement method                 | Full-matrix least-squares on F <sup>2</sup> |
| Data / restraints / parameters    | 8649 / 0 / 469                              |
| Goodness-of-fit on F <sup>2</sup> | 1.054                                       |
| Final R indices [I>2sigma(I)]     | R1 = 0.0238, wR2 = 0.0522                   |
| R indices (all data)              | R1 = 0.0251, wR2 = 0.0528                   |
| Absolute structure parameter      | 0.092(3)                                    |
| Extinction coefficient            | n/a                                         |

Table S6. Atomic coordinates ( $\times 10^4$ ) and equivalent isotropic displacement parameters ( $\text{\AA}^2 \times 10^3$ ) for ga\_221024d\_a.  $U(\text{eq})$  is defined as one third of the trace of the orthogonalized  $U^{ij}$  tensor.

|       | x        | y       | z       | U(eq) |
|-------|----------|---------|---------|-------|
| Pd(1) | 4982(1)  | 5479(1) | 6490(1) | 19(1) |
| Cl(1) | 3838(1)  | 6433(1) | 6183(1) | 30(1) |
| Cl(2) | 3224(1)  | 5258(1) | 7217(1) | 29(1) |
| P(1)  | 5856(1)  | 4499(1) | 6787(1) | 19(1) |
| P(2)  | 6371(1)  | 5759(1) | 5637(1) | 20(1) |
| Si(1) | 7028(1)  | 4044(1) | 5103(1) | 25(1) |
| C(1)  | 5465(3)  | 3855(2) | 5579(2) | 24(1) |
| C(2)  | 5036(4)  | 3935(1) | 6229(1) | 22(1) |
| C(3)  | 3795(3)  | 3686(2) | 6427(2) | 27(1) |
| C(4)  | 2978(4)  | 3361(2) | 5984(2) | 32(1) |
| C(5)  | 3367(4)  | 3297(2) | 5338(2) | 32(1) |
| C(6)  | 4605(3)  | 3534(2) | 5135(2) | 28(1) |
| C(7)  | 5085(5)  | 3464(2) | 4434(2) | 37(1) |
| C(8)  | 6161(4)  | 3990(2) | 4296(2) | 34(1) |
| C(9)  | 8195(3)  | 4735(2) | 5311(2) | 23(1) |
| C(10) | 8039(3)  | 5402(2) | 5489(1) | 22(1) |
| C(11) | 9165(3)  | 5787(2) | 5584(2) | 26(1) |
| C(12) | 10453(3) | 5529(2) | 5536(2) | 30(1) |
| C(13) | 10617(4) | 4878(2) | 5383(2) | 29(1) |
| C(14) | 9502(3)  | 4483(2) | 5262(2) | 26(1) |
| C(15) | 9674(4)  | 3772(2) | 5063(2) | 35(1) |
| C(16) | 8359(4)  | 3399(2) | 5138(2) | 34(1) |
| C(17) | 7654(3)  | 4379(2) | 6788(2) | 22(1) |
| C(18) | 8184(4)  | 3747(2) | 6756(2) | 28(1) |
| C(19) | 9553(4)  | 3653(2) | 6845(2) | 34(1) |
| C(20) | 10364(4) | 4184(2) | 6967(2) | 36(1) |
| C(21) | 9843(4)  | 4807(2) | 7015(2) | 30(1) |
| C(22) | 8478(3)  | 4903(2) | 6928(2) | 25(1) |
| C(23) | 5520(3)  | 4204(2) | 7616(2) | 24(1) |
| C(24) | 5460(4)  | 3535(2) | 7741(2) | 31(1) |
| C(25) | 5356(4)  | 3306(2) | 8376(2) | 37(1) |
| C(26) | 5305(4)  | 3744(2) | 8887(2) | 39(1) |

|       |         |         |         |       |
|-------|---------|---------|---------|-------|
| C(27) | 5392(4) | 4405(2) | 8771(2) | 38(1) |
| C(28) | 5507(3) | 4640(2) | 8137(2) | 30(1) |
| C(29) | 5484(3) | 5620(2) | 4872(2) | 25(1) |
| C(30) | 4171(4) | 5394(2) | 4869(2) | 28(1) |
| C(31) | 3501(4) | 5297(2) | 4285(2) | 34(1) |
| C(32) | 4133(4) | 5419(2) | 3692(2) | 34(1) |
| C(33) | 5448(4) | 5640(2) | 3691(2) | 35(1) |
| C(34) | 6121(4) | 5728(2) | 4275(2) | 31(1) |
| C(35) | 6784(4) | 6624(2) | 5696(2) | 28(1) |
| C(36) | 7173(4) | 6856(2) | 6307(2) | 35(1) |
| C(37) | 7699(4) | 7482(2) | 6374(3) | 49(1) |
| C(38) | 7815(5) | 7877(2) | 5830(3) | 62(1) |
| C(39) | 7404(5) | 7661(2) | 5231(3) | 61(1) |
| C(40) | 6873(5) | 7035(2) | 5157(2) | 42(1) |
| C(41) | 4291(6) | 6716(3) | 7977(3) | 60(1) |
| CI(3) | 3602(2) | 7147(1) | 8642(1) | 69(1) |
| CI(4) | 6012(2) | 6642(1) | 8055(1) | 83(1) |
| C(42) | 827(5)  | 6729(2) | 6967(2) | 48(1) |
| CI(5) | 1384(2) | 7539(1) | 6905(1) | 74(1) |
| CI(6) | -86(2)  | 6593(1) | 7684(1) | 82(1) |

---

## 10. Computational Details

### 10.1 Computational Methods

Density functional theory (DFT) calculations were performed using the Gaussian 16<sup>[12]</sup> and ORCA 5.0.3.<sup>[13]</sup> Geometries of intermediates and transition states were optimized using the dispersion-corrected B3LYP-D3(BJ)<sup>[14, 15]</sup> functional and the def2-svp basis set.<sup>[16]</sup> Vibrational frequency calculations and IRC calculations<sup>[17]</sup> at the same level of theory of the optimization were performed to confirm if each structure is a local minimum or a transition state. Single-point energy calculations were carried out using the M06-D3 functional<sup>[18]</sup> with the def2-tzvpp basis set. Solvation energy corrections were calculated in the single-point energy calculations using the CPCM solvation mode and dichloroethane as solvent. A conformation search was performed by manually exchanging the coordinating groups on the metal center of the intermediates and transition states, and the structures were fully optimized using DFT. Only the lowest-energy conformer of each species is reported in the text. The structures were visualized using CYLview<sup>[19]</sup>. The structure of Pd-L3 (**Figure S1**) complex was optimized using D3(BJ)-B3LYP/def2-svp. The reliability of the method was confirmed by comparing the calculated structures of Pd-L1 and Pd-L2 with the corresponding crystal structures.

### 10.2 Energy Profiles Computed for Hydrosilylation

| Si-SDP             | D3(BJ)-B3LYP/<br>def2-svp | zpe      | D3-M06/<br>def2tzvpp-CPCM(DCE) |
|--------------------|---------------------------|----------|--------------------------------|
| S <sub>Si</sub>    | -2995.473268              | 0.687529 | -2996.057063                   |
| TS <sub>Si-1</sub> | -2995.471066              | 0.687915 | -2996.049941                   |
| I <sub>Si</sub>    | -2995.476078              | 0.688733 | -2996.055257                   |
| TS <sub>Si-2</sub> | -2995.463165              | 0.687965 | -2996.046464                   |
| II <sub>Si</sub>   | -2995.497366              | 0.690766 | -2996.066617                   |
| TS <sub>Si-3</sub> | -2995.484792              | 0.689635 | -2996.058637                   |
| P <sub>Si</sub>    | -2995.497366              | 0.690766 | -2996.122153                   |

  

| SDP               | D3(BJ)-B3LYP/<br>def2-svp | zpe      | D3-M06/<br>def2tzvpp-CPCM(DCE) |
|-------------------|---------------------------|----------|--------------------------------|
| S <sub>C</sub>    | -2744.096616              | 0.695511 | -2744.627494                   |
| TS <sub>C-1</sub> | -2744.094298              | 0.695489 | -2744.621005                   |
| I <sub>C</sub>    | -2744.102384              | 0.697004 | -2744.6271                     |
| TS <sub>C-2</sub> | -2744.087218              | 0.696457 | -2744.613491                   |
| II <sub>C</sub>   | -2744.117775              | 0.698223 | -2744.634664                   |
| TS <sub>C-3</sub> | -2744.110915              | 0.697521 | -2744.6292                     |
| P <sub>C</sub>    | -2744.163533              | 0.702274 | -2744.69438                    |

### 10.3 Cartesian Coordinates

#### Rh-L3 (Si-SDP)

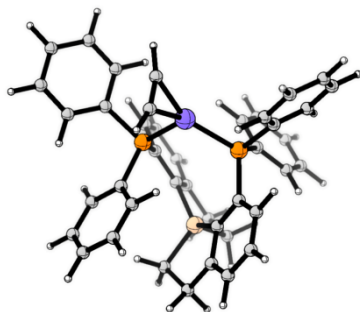

|   |             |             |             |
|---|-------------|-------------|-------------|
| P | -1.69225300 | -0.58317200 | 0.19811200  |
| P | 1.69214400  | -0.58320300 | -0.19868200 |
| C | 1.01716700  | 3.73482600  | 1.16788400  |
| H | 1.94431000  | 3.22514600  | 1.45923400  |
| H | 1.29555600  | 4.70367900  | 0.72825100  |
| C | 0.09005700  | 3.88898000  | 2.39181200  |
| H | 0.65083600  | 4.09671100  | 3.31717800  |
| H | -0.58760300 | 4.75009900  | 2.24849500  |
| C | -0.75400700 | 2.63721100  | 2.56013500  |
| C | -1.36542800 | 2.30845600  | 3.77685100  |
| H | -1.23037300 | 2.96060500  | 4.64372400  |
| C | -2.13946800 | 1.15446100  | 3.88546300  |
| H | -2.62278000 | 0.90417300  | 4.83253600  |
| C | -2.29188300 | 0.30574700  | 2.78521900  |
| H | -2.88818000 | -0.60148700 | 2.88518700  |
| C | -1.67860100 | 0.62279800  | 1.56483600  |
| C | -0.91219500 | 1.80141700  | 1.43011400  |
| C | -1.01674500 | 3.73523300  | -1.16644400 |
| H | -1.94341400 | 3.22537000  | -1.45894500 |
| H | -1.29591600 | 4.70362600  | -0.72629100 |
| C | -0.08871400 | 3.89076800  | -2.38949800 |
| H | -0.64878600 | 4.09949700  | -3.31506600 |
| H | 0.58880800  | 4.75175200  | -2.24470900 |
| C | 0.75550200  | 2.63919200  | -2.55848300 |
| C | 1.36765700  | 2.31152100  | -3.77512100 |
| H | 1.23313000  | 2.96443500  | -4.64150000 |
| C | 2.14176100  | 1.15761500  | -3.88428200 |
| H | 2.62565100  | 0.90816900  | -4.83128100 |
| C | 2.29345700  | 0.30788900  | -2.78472300 |
| H | 2.88975600  | -0.59929400 | -2.88515300 |
| C | 1.67943900  | 0.62386400  | -1.56442700 |
| C | 0.91304600  | 1.80241700  | -1.42909900 |
| C | -2.91444600 | -1.90050700 | 0.54975300  |
| C | -4.07481400 | -2.09133600 | -0.21921000 |
| H | -4.33660700 | -1.37908100 | -1.00240200 |
| C | -4.89478200 | -3.19550200 | 0.01849000  |
| H | -5.80046500 | -3.33249900 | -0.57630900 |
| C | -4.56097700 | -4.12669900 | 1.00791100  |
| H | -5.20638400 | -4.98980800 | 1.18469900  |
| C | -3.39990800 | -3.95566600 | 1.76644300  |
| H | -3.13432600 | -4.68163400 | 2.53779200  |
| C | -2.57635900 | -2.85035800 | 1.53997900  |

|    |             |             |             |
|----|-------------|-------------|-------------|
| H  | -1.67473100 | -2.71088100 | 2.14504600  |
| C  | -2.31024500 | 0.32093900  | -1.25277700 |
| C  | -3.44755700 | 1.13745700  | -1.12794400 |
| H  | -3.91848600 | 1.27608600  | -0.15201300 |
| C  | -3.96896500 | 1.77725100  | -2.25250900 |
| H  | -4.85560500 | 2.40768600  | -2.15757900 |
| C  | -3.34621500 | 1.62288900  | -3.49733900 |
| H  | -3.75035100 | 2.13414000  | -4.37392500 |
| C  | -2.20850900 | 0.82072600  | -3.61976300 |
| H  | -1.71650300 | 0.70807000  | -4.58778900 |
| C  | -1.69480100 | 0.16099600  | -2.50110000 |
| H  | -0.80737900 | -0.46890800 | -2.58535600 |
| C  | 2.91397800  | -1.90072800 | -0.55082300 |
| C  | 4.07370200  | -2.09285300 | 0.21879200  |
| H  | 4.33535600  | -1.38137000 | 1.00273300  |
| C  | 4.89319400  | -3.19729600 | -0.01924200 |
| H  | 5.79839900  | -3.33529300 | 0.57605600  |
| C  | 4.55952100  | -4.12751400 | -1.00963400 |
| H  | 5.20454800  | -4.99085600 | -1.18666800 |
| C  | 3.39907900  | -3.95520000 | -1.76883000 |
| H  | 3.13361300  | -4.68038900 | -2.54095100 |
| C  | 2.57602200  | -2.84958100 | -1.54206000 |
| H  | 1.67493500  | -2.70906100 | -2.14770000 |
| C  | 2.30980300  | 0.31948800  | 1.25321400  |
| C  | 1.69410700  | 0.15831100  | 2.50125500  |
| H  | 0.80672100  | -0.47173700 | 2.58474900  |
| C  | 2.20750300  | 0.81704000  | 3.62064300  |
| H  | 1.71527000  | 0.70345800  | 4.58844300  |
| C  | 3.34517400  | 1.61940800  | 3.49922000  |
| H  | 3.74906300  | 2.12989000  | 4.37636900  |
| C  | 3.96824300  | 1.77490800  | 2.25469500  |
| H  | 4.85489300  | 2.40544900  | 2.16056300  |
| C  | 3.44713800  | 1.13612300  | 1.12941300  |
| H  | 3.91829300  | 1.27567400  | 0.15372200  |
| Rh | -0.00015700 | -1.94889300 | -0.00143100 |
| Si | 0.00013400  | 2.65187600  | 0.00063600  |

#### Rh-L2 (SDP)

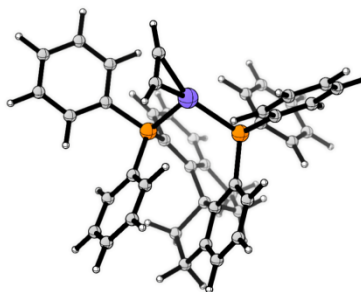

|   |             |             |             |
|---|-------------|-------------|-------------|
| P | -1.61331700 | -0.50608900 | 0.26943900  |
| P | 1.61305000  | -0.50662700 | -0.26904200 |
| C | 1.15861800  | 3.53588600  | 0.50465300  |
| H | 2.10570800  | 2.99121600  | 0.44882300  |
| H | 1.25871200  | 4.42872000  | -0.12762000 |
| C | 0.82196100  | 3.85298400  | 1.96701100  |
| H | 1.71945900  | 3.93825300  | 2.59862500  |

|   |             |             |             |
|---|-------------|-------------|-------------|
| H | 0.27125300  | 4.80402200  | 2.06680200  |
| C | -0.05428400 | 2.69944000  | 2.38507500  |
| C | -0.46664200 | 2.41046200  | 3.68403400  |
| H | -0.13120200 | 3.03241200  | 4.51725400  |
| C | -1.31738600 | 1.32684400  | 3.90372200  |
| H | -1.66867200 | 1.09324900  | 4.91099500  |
| C | -1.71731200 | 0.52956000  | 2.83217100  |
| H | -2.36892000 | -0.32128000 | 3.02658700  |
| C | -1.29319900 | 0.79848600  | 1.51457300  |
| C | -0.45757500 | 1.91697600  | 1.28461200  |
| C | -1.15766700 | 3.53615900  | -0.50623800 |
| H | -2.10500800 | 2.99196700  | -0.45000400 |
| H | -1.25728200 | 4.42937700  | 0.12556600  |
| C | -0.82101400 | 3.85232400  | -1.96879300 |
| H | -1.71852600 | 3.93769400  | -2.60037000 |
| H | -0.26985800 | 4.80304500  | -2.06912700 |
| C | 0.05465800  | 2.69816100  | -2.38633400 |
| C | 0.46669700  | 2.40828500  | -3.68519500 |
| H | 0.13135600  | 3.02989000  | -4.51871300 |
| C | 1.31699400  | 1.32422400  | -3.90440100 |
| H | 1.66801600  | 1.08991100  | -4.91159900 |
| C | 1.71682300  | 0.52742500  | -2.83245200 |
| H | 2.36810500  | -0.32375300 | -3.02648200 |
| C | 1.29303700  | 0.79726900  | -1.51494100 |
| C | 0.45780700  | 1.91616100  | -1.28548800 |
| C | -2.88405400 | -1.66329400 | 0.91179600  |
| C | -4.18151800 | -1.74993500 | 0.38160600  |
| H | -4.50883300 | -1.05282100 | -0.38957200 |
| C | -5.05802100 | -2.73777900 | 0.83552000  |
| H | -6.06755400 | -2.79261400 | 0.42246900  |
| C | -4.64902500 | -3.65662600 | 1.80671900  |
| H | -5.33916300 | -4.42885700 | 2.15331800  |
| C | -3.35377600 | -3.59081500 | 2.32821300  |
| H | -3.02702200 | -4.30930600 | 3.08290900  |
| C | -2.47355700 | -2.60310700 | 1.88312500  |
| H | -1.46237500 | -2.54785500 | 2.29899700  |
| C | -2.34081100 | 0.24197700  | -1.22001500 |
| C | -3.40937700 | 1.14741500  | -1.11525400 |
| H | -3.78488700 | 1.44142100  | -0.13214000 |
| C | -3.99214300 | 1.67280400  | -2.26968600 |
| H | -4.82355000 | 2.37622900  | -2.18720000 |
| C | -3.50749000 | 1.30183800  | -3.52905500 |
| H | -3.96074600 | 1.71987200  | -4.43070600 |
| C | -2.44882800 | 0.39549800  | -3.63470800 |
| H | -2.06787500 | 0.10808400  | -4.61650800 |
| C | -1.87076000 | -0.14013400 | -2.48315600 |
| H | -1.03617800 | -0.84066000 | -2.55216200 |
| C | 2.88335300  | -1.66456400 | -0.91098600 |
| C | 4.18103200  | -1.75095800 | -0.38128400 |
| H | 4.50874400  | -1.05334200 | 0.38927000  |
| C | 5.05726000  | -2.73920000 | -0.83486800 |
| H | 6.06695700  | -2.79383700 | -0.42219200 |
| C | 4.64778800  | -3.65868100 | -1.80526500 |
| H | 5.33771500  | -4.43120900 | -2.15161900 |
| C | 3.35232700  | -3.59311200 | -2.32626200 |
| H | 3.02519400  | -4.31209000 | -3.08033100 |

|    |             |             |             |
|----|-------------|-------------|-------------|
| C  | 2.47238100  | -2.60501900 | -1.88148700 |
| H  | 1.46104200  | -2.54994000 | -2.29701000 |
| C  | 2.34121700  | 0.24225000  | 1.21969700  |
| C  | 1.87123400  | -0.13860500 | 2.48323600  |
| H  | 1.03623100  | -0.83855600 | 2.55297300  |
| C  | 2.44990700  | 0.39754900  | 3.63424900  |
| H  | 2.06900900  | 0.11112000  | 4.61635900  |
| C  | 3.50910300  | 1.30315300  | 3.52765300  |
| H  | 3.96284400  | 1.72158200  | 4.42887700  |
| C  | 3.99366900  | 1.67288100  | 2.26788300  |
| H  | 4.82547000  | 2.37575400  | 2.18466500  |
| C  | 3.41029100  | 1.14698900  | 1.11399100  |
| H  | 3.78568900  | 1.44010100  | 0.13056400  |
| Rh | -0.00026500 | -1.95435100 | 0.00097600  |
| C  | 0.00029100  | 2.61694600  | -0.00059800 |

### S<sub>si</sub> (Si-SDP)

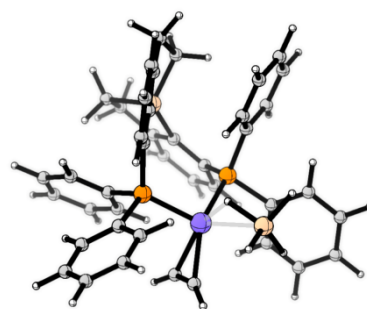

|   |           |           |           |
|---|-----------|-----------|-----------|
| P | -1.652680 | 0.270741  | -0.371259 |
| P | 1.715606  | 0.393889  | 0.161457  |
| C | 0.982451  | -4.168100 | -0.585023 |
| H | 1.941102  | -3.743706 | -0.904772 |
| H | 1.200417  | -5.062953 | 0.015997  |
| C | 0.107111  | -4.489512 | -1.816812 |
| H | 0.706198  | -4.844647 | -2.670705 |
| H | -0.595911 | -5.308237 | -1.579112 |
| C | -0.700030 | -3.265517 | -2.215409 |
| C | -1.255263 | -3.113804 | -3.492171 |
| H | -1.103096 | -3.890485 | -4.246271 |
| C | -1.998791 | -1.975801 | -3.801405 |
| H | -2.442592 | -1.863409 | -4.793234 |
| C | -2.176949 | -0.968474 | -2.847578 |
| H | -2.758826 | -0.084384 | -3.105963 |
| C | -1.614102 | -1.105062 | -1.570909 |
| C | -0.882534 | -2.263574 | -1.235886 |
| C | -1.153107 | -3.779340 | 1.595736  |
| H | -2.092046 | -3.234160 | 1.753810  |
| H | -1.410953 | -4.803964 | 1.290660  |
| C | -0.296049 | -3.744328 | 2.876250  |
| H | -0.904306 | -3.826816 | 3.791063  |
| H | 0.396868  | -4.605246 | 2.893961  |
| C | 0.523770  | -2.466088 | 2.907020  |
| C | 1.018712  | -1.941629 | 4.106838  |
| H | 0.812768  | -2.457300 | 5.048399  |

|    |           |           |           |
|----|-----------|-----------|-----------|
| C  | 1.763683  | -0.765679 | 4.100516  |
| H  | 2.158904  | -0.357237 | 5.033295  |
| C  | 2.005741  | -0.098549 | 2.897238  |
| H  | 2.593605  | 0.816976  | 2.912772  |
| C  | 1.510130  | -0.607697 | 1.686493  |
| C  | 0.768445  | -1.812279 | 1.674275  |
| C  | -2.868972 | 1.523592  | -0.935110 |
| C  | -3.958605 | 1.902712  | -0.131853 |
| H  | -4.184433 | 1.353587  | 0.782130  |
| C  | -4.752820 | 2.992340  | -0.493664 |
| H  | -5.597591 | 3.276307  | 0.137630  |
| C  | -4.469381 | 3.719655  | -1.653369 |
| H  | -5.091459 | 4.573736  | -1.929607 |
| C  | -3.387464 | 3.351444  | -2.458154 |
| H  | -3.159566 | 3.915310  | -3.365153 |
| C  | -2.587724 | 2.265087  | -2.101336 |
| H  | -1.731537 | 2.002935  | -2.724606 |
| C  | -2.404704 | -0.443682 | 1.128549  |
| C  | -3.567805 | -1.224365 | 1.003308  |
| H  | -3.971052 | -1.447428 | 0.013028  |
| C  | -4.205596 | -1.714878 | 2.141854  |
| H  | -5.110977 | -2.317169 | 2.041256  |
| C  | -3.678517 | -1.443936 | 3.411011  |
| H  | -4.174983 | -1.835549 | 4.301618  |
| C  | -2.516953 | -0.678968 | 3.537721  |
| H  | -2.095814 | -0.476300 | 4.524283  |
| C  | -1.883413 | -0.173277 | 2.399551  |
| H  | -0.972058 | 0.414891  | 2.502617  |
| C  | 3.139832  | 1.524832  | 0.445917  |
| C  | 4.339780  | 1.409705  | -0.269736 |
| H  | 4.484633  | 0.599356  | -0.982687 |
| C  | 5.361400  | 2.347889  | -0.089836 |
| H  | 6.289526  | 2.245669  | -0.656344 |
| C  | 5.197072  | 3.409345  | 0.800473  |
| H  | 5.997066  | 4.139918  | 0.938196  |
| C  | 3.997224  | 3.539239  | 1.508577  |
| H  | 3.854678  | 4.372383  | 2.200295  |
| C  | 2.973711  | 2.611808  | 1.325100  |
| H  | 2.031958  | 2.748441  | 1.856787  |
| C  | 2.294605  | -0.788442 | -1.098957 |
| C  | 1.722016  | -0.831130 | -2.375862 |
| H  | 0.855318  | -0.209121 | -2.597172 |
| C  | 2.244096  | -1.687050 | -3.348845 |
| H  | 1.781022  | -1.727101 | -4.336550 |
| C  | 3.349325  | -2.489065 | -3.055914 |
| H  | 3.763156  | -3.150495 | -3.820238 |
| C  | 3.921558  | -2.455013 | -1.778253 |
| H  | 4.777580  | -3.091077 | -1.543378 |
| C  | 3.388797  | -1.619452 | -0.797118 |
| H  | 3.824299  | -1.610027 | 0.204328  |
| Rh | 0.063960  | 1.796001  | -0.373436 |
| H  | -0.418823 | 2.262623  | 1.330361  |
| Si | -1.069334 | 3.657562  | 1.519163  |
| H  | 0.005527  | 4.589218  | 1.946695  |
| H  | -1.802741 | 4.179241  | 0.342442  |
| H  | -2.018969 | 3.394301  | 2.633536  |

|    |           |           |           |
|----|-----------|-----------|-----------|
| C  | 0.930333  | 3.496075  | -1.252954 |
| C  | 1.064260  | 2.507362  | -2.042635 |
| H  | 1.107626  | 4.538210  | -1.010132 |
| H  | 1.498836  | 2.067572  | -2.934786 |
| Si | -0.054744 | -2.889830 | 0.343078  |

TS<sub>Si</sub>-1 (Si-SDP)

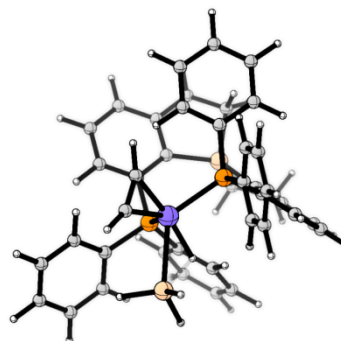

|   |           |           |           |
|---|-----------|-----------|-----------|
| P | 1.703569  | 0.225887  | -0.283242 |
| P | -1.504441 | -0.912889 | 0.205330  |
| C | -2.471641 | 3.332667  | -1.025508 |
| H | -3.168046 | 2.533314  | -1.306461 |
| H | -3.058724 | 4.132287  | -0.550881 |
| C | -1.698659 | 3.827834  | -2.263584 |
| H | -2.325894 | 3.848939  | -3.169041 |
| H | -1.355824 | 4.866927  | -2.107802 |
| C | -0.480535 | 2.949824  | -2.493492 |
| C | 0.138326  | 2.869281  | -3.746560 |
| H | -0.260931 | 3.446220  | -4.584815 |
| C | 1.254325  | 2.055968  | -3.925336 |
| H | 1.746645  | 1.999592  | -4.898639 |
| C | 1.746150  | 1.301749  | -2.858128 |
| H | 2.619670  | 0.673708  | -3.017201 |
| C | 1.129884  | 1.363863  | -1.598166 |
| C | 0.012007  | 2.206639  | -1.392530 |
| C | -0.518583 | 4.071794  | 1.226417  |
| H | 0.543891  | 3.971069  | 1.475559  |
| H | -0.663166 | 5.070569  | 0.789393  |
| C | -1.382883 | 3.854511  | 2.488072  |
| H | -0.898143 | 4.247075  | 3.396387  |
| H | -2.336753 | 4.404110  | 2.393139  |
| C | -1.696853 | 2.377724  | 2.658046  |
| C | -2.099317 | 1.834227  | 3.884317  |
| H | -2.182053 | 2.478865  | 4.763279  |
| C | -2.393866 | 0.475808  | 3.982942  |
| H | -2.721362 | 0.052897  | 4.935433  |
| C | -2.269879 | -0.356442 | 2.865509  |
| H | -2.508508 | -1.414686 | 2.961467  |
| C | -1.852431 | 0.173229  | 1.636471  |
| C | -1.575712 | 1.551869  | 1.517561  |
| C | 3.434382  | -0.277797 | -0.644472 |
| C | 4.473197  | 0.007537  | 0.256347  |
| H | 4.286392  | 0.603776  | 1.147933  |
| C | 5.761386  | -0.484771 | 0.026207  |

|    |           |           |           |
|----|-----------|-----------|-----------|
| H  | 6.557339  | -0.257700 | 0.738509  |
| C  | 6.027918  | -1.264266 | -1.099290 |
| H  | 7.034815  | -1.648767 | -1.275268 |
| C  | 4.995003  | -1.563601 | -1.995379 |
| H  | 5.191637  | -2.184692 | -2.871901 |
| C  | 3.707356  | -1.086761 | -1.764213 |
| H  | 2.904185  | -1.379264 | -2.439755 |
| C  | 1.849990  | 1.259237  | 1.211691  |
| C  | 2.571513  | 2.462601  | 1.099139  |
| H  | 2.937317  | 2.792675  | 0.124516  |
| C  | 2.829992  | 3.231125  | 2.232969  |
| H  | 3.398890  | 4.158679  | 2.141285  |
| C  | 2.349612  | 2.819822  | 3.482252  |
| H  | 2.546373  | 3.426959  | 4.368557  |
| C  | 1.615590  | 1.637311  | 3.593371  |
| H  | 1.225789  | 1.319103  | 4.561818  |
| C  | 1.374279  | 0.852601  | 2.463270  |
| H  | 0.799915  | -0.067331 | 2.559228  |
| C  | -2.215209 | -2.566462 | 0.561658  |
| C  | -3.186872 | -3.143159 | -0.272640 |
| H  | -3.612088 | -2.571914 | -1.097717 |
| C  | -3.609882 | -4.456300 | -0.056704 |
| H  | -4.368354 | -4.891744 | -0.710911 |
| C  | -3.068486 | -5.211403 | 0.987174  |
| H  | -3.402254 | -6.238210 | 1.151264  |
| C  | -2.094955 | -4.649336 | 1.817840  |
| H  | -1.662878 | -5.233582 | 2.633021  |
| C  | -1.663912 | -3.340187 | 1.603241  |
| H  | -0.892434 | -2.921620 | 2.250195  |
| C  | -2.543346 | -0.234226 | -1.131523 |
| C  | -2.024222 | -0.032082 | -2.416029 |
| H  | -0.969373 | -0.223832 | -2.607506 |
| C  | -2.851576 | 0.439009  | -3.439184 |
| H  | -2.436571 | 0.607882  | -4.434855 |
| C  | -4.200293 | 0.698174  | -3.185429 |
| H  | -4.847418 | 1.061980  | -3.986602 |
| C  | -4.723285 | 0.500859  | -1.900975 |
| H  | -5.775723 | 0.711407  | -1.699416 |
| C  | -3.897393 | 0.045307  | -0.874121 |
| H  | -4.302739 | -0.094997 | 0.130302  |
| Rh | 0.634322  | -1.738540 | -0.227624 |
| H  | 1.057881  | -1.713721 | 1.387509  |
| Si | 2.290103  | -2.884406 | 1.371509  |
| H  | 1.654294  | -4.192557 | 1.681194  |
| H  | 3.472248  | -3.055628 | 0.491037  |
| H  | 2.790593  | -2.289748 | 2.647203  |
| C  | 1.196992  | -3.266357 | -1.517848 |
| C  | 0.250973  | -2.602100 | -2.069032 |
| H  | 1.893993  | -4.098445 | -1.559179 |
| H  | -0.434785 | -2.513092 | -2.905838 |
| Si | -1.090370 | 2.679470  | 0.082865  |

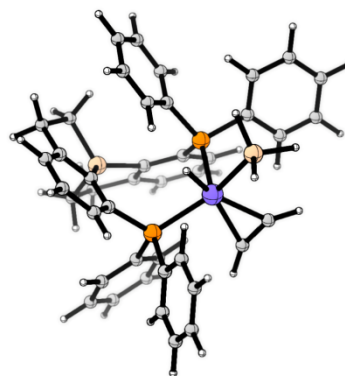

|   |           |           |           |
|---|-----------|-----------|-----------|
| P | -1.863487 | 0.164717  | -0.171489 |
| P | 1.831248  | 0.635449  | 0.156140  |
| C | 1.721624  | -3.627817 | -1.139164 |
| H | 2.586043  | -2.992435 | -1.367718 |
| H | 2.105922  | -4.564526 | -0.709853 |
| C | 0.881825  | -3.862504 | -2.407079 |
| H | 1.502957  | -3.943485 | -3.313419 |
| H | 0.332232  | -4.818210 | -2.329857 |
| C | -0.132644 | -2.744535 | -2.570141 |
| C | -0.722277 | -2.481618 | -3.812610 |
| H | -0.435095 | -3.076982 | -4.683230 |
| C | -1.669417 | -1.470675 | -3.936693 |
| H | -2.142108 | -1.269101 | -4.900423 |
| C | -2.023379 | -0.708347 | -2.821799 |
| H | -2.779619 | 0.062953  | -2.939019 |
| C | -1.431869 | -0.948218 | -1.570747 |
| C | -0.475369 | -1.983892 | -1.424444 |
| C | -0.325991 | -3.986915 | 1.147208  |
| H | -1.339889 | -3.663316 | 1.405743  |
| H | -0.408648 | -4.985350 | 0.693426  |
| C | 0.572420  | -3.989655 | 2.403819  |
| H | 0.006385  | -4.242443 | 3.314967  |
| H | 1.354011  | -4.764722 | 2.309568  |
| C | 1.258638  | -2.643975 | 2.569880  |
| C | 1.851066  | -2.250907 | 3.777215  |
| H | 1.800370  | -2.910500 | 4.647580  |
| C | 2.508007  | -1.025562 | 3.865614  |
| H | 2.981578  | -0.723362 | 4.802513  |
| C | 2.564016  | -0.171572 | 2.758172  |
| H | 3.079471  | 0.784370  | 2.846529  |
| C | 1.956966  | -0.545265 | 1.552109  |
| C | 1.306949  | -1.792492 | 1.443283  |
| C | -3.469791 | 0.968395  | -0.575024 |
| C | -4.599079 | 0.801654  | 0.241158  |
| H | -4.565586 | 0.140254  | 1.105174  |
| C | -5.778566 | 1.500722  | -0.033961 |
| H | -6.645858 | 1.363683  | 0.615238  |
| C | -5.847237 | 2.369957  | -1.122214 |
| H | -6.770524 | 2.913022  | -1.334620 |
| C | -4.720515 | 2.556079  | -1.931198 |
| H | -4.759407 | 3.246678  | -2.776358 |
| C | -3.539052 | 1.874207  | -1.651684 |
| H | -2.657934 | 2.066403  | -2.264049 |
| C | -2.241392 | -0.951597 | 1.218851  |

**I<sub>si</sub>(Si-SDP)**



|    |           |           |           |
|----|-----------|-----------|-----------|
| C  | -3.205990 | -1.953749 | 0.997843  |
| H  | -3.644400 | -2.084056 | 0.006256  |
| C  | -3.609753 | -2.778959 | 2.045807  |
| H  | -4.364263 | -3.548442 | 1.870153  |
| C  | -3.037955 | -2.629640 | 3.315542  |
| H  | -3.351309 | -3.280686 | 4.134512  |
| C  | -2.059217 | -1.657748 | 3.529963  |
| H  | -1.595338 | -1.548901 | 4.512002  |
| C  | -1.666482 | -0.815431 | 2.486508  |
| H  | -0.902067 | -0.058413 | 2.663724  |
| C  | 2.900912  | 2.065081  | 0.580638  |
| C  | 4.057388  | 2.385811  | -0.144987 |
| H  | 4.401233  | 1.736590  | -0.950330 |
| C  | 4.776089  | 3.547461  | 0.154927  |
| H  | 5.675574  | 3.786085  | -0.416896 |
| C  | 4.349835  | 4.398086  | 1.176706  |
| H  | 4.914316  | 5.304072  | 1.407362  |
| C  | 3.193215  | 4.088801  | 1.900271  |
| H  | 2.849107  | 4.751798  | 2.696971  |
| C  | 2.468930  | 2.935599  | 1.600828  |
| H  | 1.559463  | 2.714529  | 2.163669  |
| C  | 2.646951  | -0.183490 | -1.251666 |
| C  | 2.035784  | -0.196437 | -2.512156 |
| H  | 1.048590  | 0.249489  | -2.641827 |
| C  | 2.676649  | -0.806383 | -3.593959 |
| H  | 2.189306  | -0.824042 | -4.570799 |
| C  | 3.929829  | -1.398535 | -3.421609 |
| H  | 4.430607  | -1.874008 | -4.267875 |
| C  | 4.542913  | -1.391518 | -2.162209 |
| H  | 5.518432  | -1.862903 | -2.025154 |
| C  | 3.902111  | -0.793035 | -1.077883 |
| H  | 4.371059  | -0.805363 | -0.091487 |
| Rh | -0.292423 | 1.753423  | -0.010542 |
| H  | -0.328610 | 1.262758  | 1.466650  |
| Si | -1.861913 | 3.022360  | 1.307554  |
| H  | -0.977008 | 3.949447  | 2.079353  |
| H  | -2.844364 | 3.832842  | 0.534724  |
| H  | -2.635143 | 2.197581  | 2.279375  |
| C  | -0.589742 | 3.386315  | -1.313475 |
| C  | 0.510957  | 2.852214  | -1.639877 |
| H  | -1.364907 | 4.133495  | -1.441346 |
| H  | 1.417747  | 2.798945  | -2.228839 |
| Si | 0.520924  | -2.736627 | 0.013279  |

TS<sub>Si-2</sub> (Si-SDP)

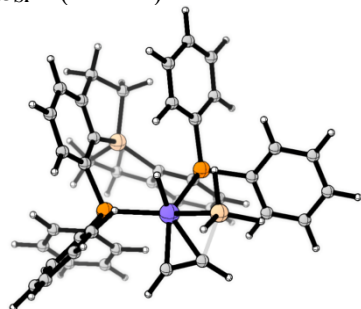

|   |           |          |           |
|---|-----------|----------|-----------|
| P | -1.905530 | 0.186036 | -0.079050 |
|---|-----------|----------|-----------|

|   |           |           |           |
|---|-----------|-----------|-----------|
| P | 1.910156  | 0.585977  | 0.088371  |
| C | 1.439912  | -3.735153 | -1.155799 |
| H | 2.314122  | -3.145181 | -1.454583 |
| H | 1.812225  | -4.671280 | -0.714642 |
| C | 0.521568  | -3.980963 | -2.367208 |
| H | 1.088082  | -4.077466 | -3.307637 |
| H | -0.024647 | -4.933537 | -2.244874 |
| C | -0.501769 | -2.865076 | -2.489551 |
| C | -1.234565 | -2.680193 | -3.669297 |
| H | -1.040619 | -3.322217 | -4.532612 |
| C | -2.215203 | -1.696070 | -3.734315 |
| H | -2.806141 | -1.563946 | -4.643432 |
| C | -2.451035 | -0.869451 | -2.632012 |
| H | -3.233316 | -0.117124 | -2.700720 |
| C | -1.702859 | -1.018432 | -1.454826 |
| C | -0.724216 | -2.037901 | -1.362684 |
| C | -0.519432 | -3.916724 | 1.236183  |
| H | -1.494539 | -3.512592 | 1.532503  |
| H | -0.696091 | -4.915759 | 0.811451  |
| C | 0.435910  | -3.954781 | 2.445802  |
| H | -0.096025 | -4.155810 | 3.389756  |
| H | 1.164872  | -4.776817 | 2.328908  |
| C | 1.207822  | -2.650321 | 2.549699  |
| C | 1.872758  | -2.280562 | 3.726294  |
| H | 1.816411  | -2.927168 | 4.606017  |
| C | 2.605069  | -1.097685 | 3.773239  |
| H | 3.133050  | -0.812625 | 4.686043  |
| C | 2.665171  | -0.263772 | 2.651779  |
| H | 3.237636  | 0.661459  | 2.707086  |
| C | 1.990414  | -0.614097 | 1.474255  |
| C | 1.258955  | -1.820638 | 1.404841  |
| C | -3.439214 | 1.146038  | -0.413132 |
| C | -4.491487 | 1.201258  | 0.512717  |
| H | -4.455059 | 0.605615  | 1.424412  |
| C | -5.593107 | 2.031534  | 0.281262  |
| H | -6.401467 | 2.067689  | 1.014712  |
| C | -5.662057 | 2.807712  | -0.876017 |
| H | -6.526697 | 3.449990  | -1.056061 |
| C | -4.611772 | 2.768273  | -1.799781 |
| H | -4.652140 | 3.381127  | -2.702957 |
| C | -3.503337 | 1.957312  | -1.563803 |
| H | -2.674203 | 1.968526  | -2.272800 |
| C | -2.313213 | -0.826772 | 1.381445  |
| C | -3.368377 | -1.753088 | 1.286563  |
| H | -3.899964 | -1.880443 | 0.340993  |
| C | -3.734874 | -2.511964 | 2.396653  |
| H | -4.555680 | -3.227929 | 2.318383  |
| C | -3.042477 | -2.365106 | 3.605611  |
| H | -3.326612 | -2.965567 | 4.472576  |
| C | -1.985104 | -1.458516 | 3.699529  |
| H | -1.432222 | -1.350459 | 4.634589  |
| C | -1.624437 | -0.686920 | 2.591315  |
| H | -0.792740 | 0.015089  | 2.670228  |
| C | 3.165031  | 1.872524  | 0.472343  |
| C | 4.401917  | 1.954235  | -0.180014 |
| H | 4.672990  | 1.229938  | -0.947538 |

|    |           |           |           |   |           |           |           |
|----|-----------|-----------|-----------|---|-----------|-----------|-----------|
| C  | 5.296943  | 2.983190  | 0.135615  | H | -3.372559 | -1.151220 | -4.646755 |
| H  | 6.254907  | 3.040642  | -0.385807 | C | -2.713260 | -0.270999 | -2.788101 |
| C  | 4.969194  | 3.930833  | 1.105539  | H | -2.979507 | 0.742115  | -3.092194 |
| H  | 5.670728  | 4.731342  | 1.349976  | C | -2.148540 | -0.512563 | -1.530450 |
| C  | 3.731951  | 3.858598  | 1.756622  | C | -1.817669 | -1.824179 | -1.134124 |
| H  | 3.463455  | 4.602252  | 2.510087  | C | -2.538558 | -2.829717 | 1.791779  |
| C  | 2.832388  | 2.844196  | 1.434863  | H | -3.194057 | -1.951228 | 1.856213  |
| H  | 1.858154  | 2.811213  | 1.928322  | H | -3.175165 | -3.700990 | 1.579636  |
| C  | 2.520310  | -0.304131 | -1.377692 | C | -1.731040 | -2.992124 | 3.090989  |
| C  | 1.810474  | -0.246468 | -2.584562 | H | -2.310558 | -2.711912 | 3.985105  |
| H  | 0.869025  | 0.303321  | -2.635179 | H | -1.446812 | -4.050582 | 3.233701  |
| C  | 2.294385  | -0.913019 | -3.713116 | C | -0.459927 | -2.164209 | 3.015890  |
| H  | 1.728921  | -0.876485 | -4.646288 | C | 0.229540  | -1.801620 | 4.180252  |
| C  | 3.492651  | -1.627417 | -3.643456 | H | -0.161804 | -2.105096 | 5.154759  |
| H  | 3.872776  | -2.144321 | -4.527364 | C | 1.404935  | -1.063808 | 4.096415  |
| C  | 4.202698  | -1.692431 | -2.438212 | H | 1.954202  | -0.791035 | 5.000176  |
| H  | 5.131632  | -2.263560 | -2.379513 | C | 1.887454  | -0.665912 | 2.847418  |
| C  | 3.714013  | -1.043651 | -1.304421 | H | 2.814799  | -0.100330 | 2.802773  |
| H  | 4.251203  | -1.123633 | -0.356933 | C | 1.200920  | -1.004365 | 1.671194  |
| Rh | -0.131178 | 1.669731  | -0.155657 | C | 0.013413  | -1.779165 | 1.736186  |
| H  | -0.141133 | 1.174798  | 1.298963  | C | -2.028136 | 2.454001  | -1.105933 |
| Si | -1.538271 | 3.613638  | 0.790348  | C | -2.701753 | 3.423277  | -0.338662 |
| H  | -0.677045 | 4.693384  | 1.338105  | H | -3.142546 | 3.148008  | 0.620476  |
| H  | -2.794298 | 4.170844  | 0.234851  | C | -2.803895 | 4.736006  | -0.798502 |
| H  | -1.904706 | 2.714493  | 1.922772  | H | -3.334247 | 5.478128  | -0.197755 |
| C  | -0.535259 | 3.533066  | -1.118937 | C | -2.231364 | 5.105065  | -2.021277 |
| C  | 0.713320  | 3.146103  | -1.236566 | H | -2.313356 | 6.135290  | -2.374151 |
| H  | -1.184733 | 4.209788  | -1.685508 | C | -1.558723 | 4.153520  | -2.790285 |
| H  | 1.613906  | 3.407932  | -1.790267 | H | -1.113546 | 4.434004  | -3.747094 |
| Si | 0.349360  | -2.751856 | 0.030231  | C | -1.450851 | 2.835350  | -2.338956 |

### II<sub>Si</sub> (Si-SDP)

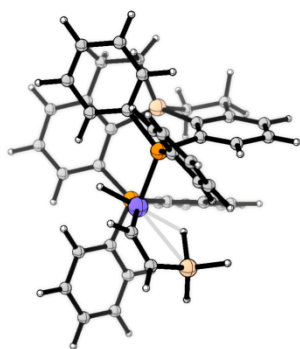

|   |           |           |           |   |           |           |           |
|---|-----------|-----------|-----------|---|-----------|-----------|-----------|
| P | -1.616968 | 0.812208  | -0.404860 | H | -0.930797 | 2.099497  | -2.954002 |
| P | 1.805179  | -0.310724 | 0.077206  | C | -2.634569 | 0.646926  | 1.094134  |
| C | -0.747120 | -4.215228 | -0.319026 | C | -4.018946 | 0.428705  | 0.991856  |
| H | 0.299490  | -4.220037 | -0.642973 | H | -4.487000 | 0.346079  | 0.008282  |
| H | -0.881965 | -5.071422 | 0.358081  | C | -4.791128 | 0.304157  | 2.146441  |
| C | -1.687451 | -4.288787 | -1.544753 | H | -5.866774 | 0.133176  | 2.066240  |
| H | -1.245301 | -4.873735 | -2.367526 | C | -4.185836 | 0.389663  | 3.406755  |
| H | -2.623385 | -4.809193 | -1.273511 | H | -4.791964 | 0.284173  | 4.309292  |
| C | -2.044187 | -2.892333 | -2.026744 | C | -2.809378 | 0.604745  | 3.511160  |
| C | -2.593722 | -2.641213 | -3.291889 | H | -2.334092 | 0.661871  | 4.492524  |
| H | -2.757287 | -3.468892 | -3.987216 | C | -2.033088 | 0.735557  | 2.356892  |
| C | -2.934072 | -1.340882 | -3.664322 | H | -0.955313 | 0.881309  | 2.437786  |
|   |           |           |           | C | 3.580788  | 0.126249  | 0.262146  |
|   |           |           |           | C | 4.567461  | -0.460321 | -0.544846 |
|   |           |           |           | H | 4.307681  | -1.238003 | -1.261374 |
|   |           |           |           | C | 5.899111  | -0.043780 | -0.447901 |
|   |           |           |           | H | 6.654149  | -0.509522 | -1.084797 |
|   |           |           |           | C | 6.261146  | 0.959386  | 0.451121  |
|   |           |           |           | H | 7.302291  | 1.280238  | 0.526741  |
|   |           |           |           | C | 5.280299  | 1.563881  | 1.244886  |
|   |           |           |           | H | 5.549431  | 2.363407  | 1.938296  |
|   |           |           |           | C | 3.951241  | 1.161841  | 1.140388  |
|   |           |           |           | H | 3.198479  | 1.675721  | 1.737188  |
|   |           |           |           | C | 1.803880  | -1.741102 | -1.057851 |
|   |           |           |           | C | 1.201994  | -1.730092 | -2.320566 |
|   |           |           |           | H | 0.629231  | -0.861584 | -2.644933 |

|    |           |           |           |
|----|-----------|-----------|-----------|
| C  | 1.319685  | -2.837753 | -3.165033 |
| H  | 0.834360  | -2.821526 | -4.142636 |
| C  | 2.051515  | -3.954648 | -2.759250 |
| H  | 2.152192  | -4.814857 | -3.424624 |
| C  | 2.646631  | -3.977524 | -1.491602 |
| H  | 3.207801  | -4.854993 | -1.163826 |
| C  | 2.512354  | -2.884054 | -0.638198 |
| H  | 2.967168  | -2.913425 | 0.354130  |
| Rh | 0.646575  | 1.498726  | -0.492536 |
| H  | 0.811147  | 0.860038  | -1.879602 |
| Si | 1.060683  | 3.710802  | 1.255048  |
| H  | 0.405928  | 2.303012  | 1.198619  |
| H  | 1.818420  | 3.621280  | 2.535151  |
| H  | -0.072998 | 4.660727  | 1.403753  |
| C  | 2.148544  | 3.854371  | -0.250569 |
| C  | 2.196833  | 2.706110  | -0.956263 |
| H  | 2.745741  | 4.742689  | -0.501304 |
| H  | 2.897142  | 2.550258  | -1.786984 |
| Si | -1.199601 | -2.566585 | 0.486986  |

### TS<sub>Si-3</sub>

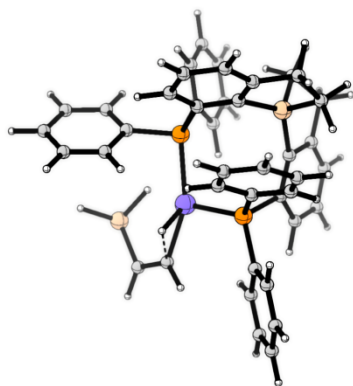

|   |           |           |           |
|---|-----------|-----------|-----------|
| P | -1.666642 | 0.330801  | -0.253100 |
| P | 1.888928  | 0.290168  | 0.020317  |
| C | 0.657427  | -4.347869 | -0.294416 |
| H | 1.714950  | -4.148056 | -0.501429 |
| H | 0.622914  | -5.234675 | 0.355344  |
| C | -0.130837 | -4.566747 | -1.607688 |
| H | 0.522343  | -4.905712 | -2.427735 |
| H | -0.877566 | -5.368334 | -1.469851 |
| C | -0.864140 | -3.302414 | -2.026458 |
| C | -1.435079 | -3.161860 | -3.299246 |
| H | -1.335763 | -3.967739 | -4.031196 |
| C | -2.129548 | -2.001284 | -3.627315 |
| H | -2.588683 | -1.896815 | -4.613100 |
| C | -2.238542 | -0.956156 | -2.702785 |
| H | -2.781025 | -0.054441 | -2.983042 |
| C | -1.657629 | -1.075289 | -1.433819 |
| C | -0.981706 | -2.262673 | -1.079739 |
| C | -1.315858 | -3.507739 | 1.896802  |
| H | -2.171879 | -2.845938 | 2.067906  |
| H | -1.711222 | -4.513002 | 1.690784  |
| C | -0.370777 | -3.488098 | 3.113717  |

|    |           |           |           |
|----|-----------|-----------|-----------|
| H  | -0.917203 | -3.397894 | 4.066410  |
| H  | 0.189812  | -4.438423 | 3.176248  |
| C  | 0.630530  | -2.352147 | 2.980160  |
| C  | 1.344417  | -1.884280 | 4.089819  |
| H  | 1.161808  | -2.320915 | 5.075224  |
| C  | 2.289619  | -0.876368 | 3.932382  |
| H  | 2.868569  | -0.521118 | 4.787642  |
| C  | 2.494691  | -0.303246 | 2.675906  |
| H  | 3.238331  | 0.482744  | 2.583248  |
| C  | 1.767049  | -0.735079 | 1.553431  |
| C  | 0.838255  | -1.797830 | 1.691743  |
| C  | -2.798186 | 1.574216  | -1.006444 |
| C  | -4.022865 | 1.930772  | -0.426307 |
| H  | -4.381247 | 1.415690  | 0.465098  |
| C  | -4.791467 | 2.960668  | -0.979956 |
| H  | -5.743811 | 3.229113  | -0.517319 |
| C  | -4.348877 | 3.640583  | -2.116020 |
| H  | -4.952719 | 4.442536  | -2.545999 |
| C  | -3.123849 | 3.295236  | -2.696710 |
| H  | -2.765939 | 3.826997  | -3.581036 |
| C  | -2.349415 | 2.277285  | -2.140623 |
| H  | -1.383835 | 2.032449  | -2.587774 |
| C  | -2.556431 | -0.293704 | 1.210762  |
| C  | -3.752363 | -1.020240 | 1.084317  |
| H  | -4.147232 | -1.250795 | 0.092378  |
| C  | -4.428490 | -1.454100 | 2.224533  |
| H  | -5.358571 | -2.017683 | 2.124391  |
| C  | -3.909434 | -1.177820 | 3.495907  |
| H  | -4.437742 | -1.525254 | 4.386497  |
| C  | -2.712647 | -0.468709 | 3.626312  |
| H  | -2.299239 | -0.264321 | 4.616058  |
| C  | -2.037802 | -0.025981 | 2.485588  |
| H  | -1.091358 | 0.511738  | 2.586437  |
| C  | 3.569937  | 1.043237  | 0.003673  |
| C  | 4.501512  | 0.713520  | -0.994628 |
| H  | 4.246960  | -0.004108 | -1.772906 |
| C  | 5.768536  | 1.303727  | -1.005761 |
| H  | 6.479071  | 1.033141  | -1.789737 |
| C  | 6.125152  | 2.230213  | -0.025134 |
| H  | 7.117230  | 2.686716  | -0.034433 |
| C  | 5.199757  | 2.580612  | 0.962678  |
| H  | 5.461913  | 3.316876  | 1.725551  |
| C  | 3.930869  | 2.002595  | 0.970071  |
| H  | 3.210949  | 2.319996  | 1.724376  |
| C  | 1.906717  | -0.806370 | -1.426549 |
| C  | 1.247906  | -0.412643 | -2.599961 |
| H  | 0.653068  | 0.501098  | -2.600627 |
| C  | 1.344713  | -1.192362 | -3.751284 |
| H  | 0.816415  | -0.890803 | -4.657169 |
| C  | 2.110237  | -2.362114 | -3.740151 |
| H  | 2.185261  | -2.973369 | -4.642152 |
| C  | 2.781778  | -2.750008 | -2.577523 |
| H  | 3.384434  | -3.660817 | -2.570627 |
| C  | 2.680493  | -1.975902 | -1.420241 |
| H  | 3.210547  | -2.273739 | -0.513063 |
| Rh | 0.202226  | 1.781338  | 0.196850  |

|    |           |           |           |
|----|-----------|-----------|-----------|
| H  | 0.730815  | 2.635103  | -0.990982 |
| Si | -1.089548 | 4.319234  | 0.900370  |
| H  | -1.236081 | 2.790708  | 0.770952  |
| H  | -1.558398 | 4.598716  | 2.283448  |
| H  | -2.032081 | 4.869716  | -0.105357 |
| C  | 0.717275  | 4.626318  | 0.576599  |
| C  | 1.369134  | 3.516196  | 0.159847  |
| H  | 1.237121  | 5.583718  | 0.709722  |
| H  | 2.430863  | 3.559194  | -0.102146 |
| Si | -0.200922 | -2.865941 | 0.517526  |

|    |           |           |           |
|----|-----------|-----------|-----------|
| C  | -3.788076 | 2.413180  | -0.141330 |
| H  | -4.196891 | 1.850005  | 0.697879  |
| C  | -4.433155 | 3.579233  | -0.566979 |
| H  | -5.344509 | 3.904930  | -0.060607 |
| C  | -3.920765 | 4.322876  | -1.631989 |
| H  | -4.428997 | 5.231456  | -1.961816 |
| C  | -2.750863 | 3.900747  | -2.272551 |
| H  | -2.341766 | 4.477633  | -3.104957 |
| C  | -2.098924 | 2.744827  | -1.843599 |
| H  | -1.177364 | 2.432000  | -2.338654 |
| C  | -2.576537 | -0.140174 | 1.219248  |
| C  | -3.842519 | -0.713872 | 1.012578  |
| H  | -4.251791 | -0.783669 | 0.002276  |
| C  | -4.572142 | -1.199024 | 2.097704  |
| H  | -5.557389 | -1.641809 | 1.936808  |
| C  | -4.036965 | -1.129226 | 3.390404  |
| H  | -4.607954 | -1.517084 | 4.236889  |
| C  | -2.770990 | -0.575440 | 3.597220  |
| H  | -2.346569 | -0.533679 | 4.602413  |
| C  | -2.041516 | -0.078695 | 2.513711  |
| H  | -1.044699 | 0.341738  | 2.666374  |
| C  | 3.554406  | 0.733697  | 0.196046  |
| C  | 4.503115  | 0.459742  | -0.801782 |
| H  | 4.246760  | -0.179616 | -1.645593 |
| C  | 5.786408  | 1.010349  | -0.729163 |
| H  | 6.511290  | 0.787343  | -1.515067 |
| C  | 6.141155  | 1.838257  | 0.336857  |
| H  | 7.144862  | 2.265145  | 0.391219  |
| C  | 5.201688  | 2.123449  | 1.332756  |
| H  | 5.468009  | 2.773678  | 2.169006  |
| C  | 3.918135  | 1.583360  | 1.257859  |
| H  | 3.190750  | 1.827748  | 2.032433  |
| C  | 1.830651  | -0.852692 | -1.460941 |
| C  | 1.244771  | -0.280056 | -2.598968 |
| H  | 0.726472  | 0.675474  | -2.510131 |
| C  | 1.310823  | -0.937290 | -3.826413 |
| H  | 0.837910  | -0.496176 | -4.705402 |
| C  | 1.973843  | -2.164419 | -3.925970 |
| H  | 2.024216  | -2.680798 | -4.887091 |
| C  | 2.574633  | -2.730660 | -2.798175 |
| H  | 3.097492  | -3.686291 | -2.877629 |
| C  | 2.503654  | -2.078103 | -1.565713 |
| H  | 2.975730  | -2.517245 | -0.684152 |
| Rh | 0.311686  | 1.732174  | 0.391258  |
| H  | 0.844696  | 3.452783  | -1.536365 |
| Si | -0.166197 | 4.179250  | 1.192974  |
| H  | -0.934339 | 2.783239  | 1.199930  |
| H  | -0.169680 | 4.596161  | 2.614801  |
| H  | -0.988967 | 5.043069  | 0.313610  |
| C  | 1.473727  | 3.641294  | 0.541722  |
| C  | 1.559534  | 3.149200  | -0.763923 |
| H  | 2.359237  | 3.606136  | 1.179891  |
| H  | 2.513430  | 2.768174  | -1.139839 |
| Si | -0.536115 | -2.867124 | 0.245725  |

P<sub>si</sub> (Si-SDP)

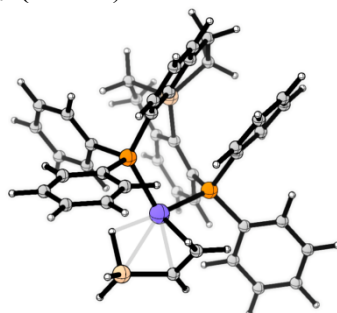

|   |           |           |           |
|---|-----------|-----------|-----------|
| P | -1.625761 | 0.554734  | -0.170024 |
| P | 1.831710  | 0.083619  | 0.096677  |
| C | 0.177616  | -4.323702 | -0.734266 |
| H | 1.251393  | -4.200992 | -0.917649 |
| H | 0.052192  | -5.273876 | -0.194734 |
| C | -0.611548 | -4.306637 | -2.063597 |
| H | 0.009168  | -4.626059 | -2.916122 |
| H | -1.447522 | -5.026556 | -2.015770 |
| C | -1.188315 | -2.927405 | -2.338517 |
| C | -1.706475 | -2.578127 | -3.593221 |
| H | -1.678203 | -3.301050 | -4.412711 |
| C | -2.260161 | -1.317015 | -3.791829 |
| H | -2.681638 | -1.048945 | -4.763396 |
| C | -2.274158 | -0.379666 | -2.753169 |
| H | -2.709214 | 0.601760  | -2.933491 |
| C | -1.740415 | -0.707071 | -1.499447 |
| C | -1.212977 | -1.997455 | -1.276595 |
| C | -1.721037 | -3.543732 | 1.547887  |
| H | -2.497139 | -2.815868 | 1.808654  |
| H | -2.226696 | -4.466491 | 1.228296  |
| C | -0.779942 | -3.777951 | 2.747432  |
| H | -1.314620 | -3.740436 | 3.710358  |
| H | -0.333777 | -4.787253 | 2.689515  |
| C | 0.346112  | -2.756099 | 2.738617  |
| C | 1.122766  | -2.517171 | 3.878836  |
| H | 0.903892  | -3.051791 | 4.806929  |
| C | 2.177347  | -1.611673 | 3.821744  |
| H | 2.805813  | -1.439167 | 4.698276  |
| C | 2.429975  | -0.904683 | 2.643669  |
| H | 3.256523  | -0.199345 | 2.630496  |
| C | 1.639939  | -1.102458 | 1.498972  |
| C | 0.604272  | -2.068090 | 1.527402  |
| C | -2.617566 | 1.982182  | -0.779708 |

**Sc (SDP)**

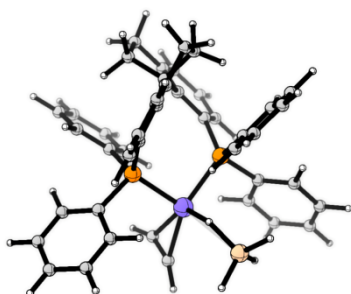

|   |           |           |           |
|---|-----------|-----------|-----------|
| P | 1.564009  | 0.077113  | -0.388877 |
| P | -1.584055 | -0.560800 | 0.232500  |
| C | -1.746581 | 3.642104  | 0.050878  |
| H | -2.609473 | 2.970143  | 0.052373  |
| H | -1.929044 | 4.406998  | 0.817796  |
| C | -1.532401 | 4.222144  | -1.353524 |
| H | -2.464459 | 4.272112  | -1.936967 |
| H | -1.124248 | 5.246764  | -1.318327 |
| C | -0.528629 | 3.283727  | -1.974573 |
| C | -0.138658 | 3.260489  | -3.311557 |
| H | -0.590424 | 3.950720  | -4.027882 |
| C | 0.841613  | 2.354965  | -3.718120 |
| H | 1.180419  | 2.334267  | -4.756114 |
| C | 1.393206  | 1.465047  | -2.796603 |
| H | 2.153077  | 0.764666  | -3.137963 |
| C | 0.991006  | 1.460513  | -1.445606 |
| C | 0.026259  | 2.403721  | -1.024822 |
| C | 0.598165  | 3.818405  | 0.965543  |
| H | 1.605771  | 3.417665  | 0.819719  |
| H | 0.556709  | 4.792394  | 0.459080  |
| C | 0.274059  | 3.887248  | 2.461840  |
| H | 1.170877  | 4.027632  | 3.084287  |
| H | -0.411119 | 4.719253  | 2.698602  |
| C | -0.397772 | 2.565447  | 2.732843  |
| C | -0.684374 | 2.043082  | 3.990999  |
| H | -0.406978 | 2.596090  | 4.891501  |
| C | -1.332355 | 0.812192  | 4.080761  |
| H | -1.587508 | 0.387297  | 5.053895  |
| C | -1.654530 | 0.112345  | 2.919085  |
| H | -2.154706 | -0.847973 | 3.018834  |
| C | -1.354793 | 0.616197  | 1.635432  |
| C | -0.730057 | 1.883745  | 1.542645  |
| C | 2.932347  | -0.795713 | -1.252537 |
| C | 4.216195  | -0.906173 | -0.693364 |
| H | 4.474999  | -0.351207 | 0.207498  |
| C | 5.169351  | -1.744397 | -1.277437 |
| H | 6.163674  | -1.819879 | -0.832049 |
| C | 4.854473  | -2.486103 | -2.418254 |
| H | 5.601830  | -3.142876 | -2.868625 |
| C | 3.577343  | -2.387978 | -2.979602 |
| H | 3.321293  | -2.968210 | -3.868581 |
| C | 2.620858  | -1.555100 | -2.400375 |
| H | 1.620013  | -1.508246 | -2.832579 |

|    |           |           |           |
|----|-----------|-----------|-----------|
| C  | 2.346231  | 0.796132  | 1.091773  |
| C  | 3.334998  | 1.784654  | 0.941592  |
| H  | 3.599212  | 2.146234  | -0.055127 |
| C  | 3.978268  | 2.306776  | 2.063391  |
| H  | 4.747448  | 3.072520  | 1.942070  |
| C  | 3.632723  | 1.852770  | 3.342141  |
| H  | 4.134077  | 2.265520  | 4.220437  |
| C  | 2.646907  | 0.875374  | 3.494417  |
| H  | 2.365311  | 0.528571  | 4.490430  |
| C  | 2.006721  | 0.344951  | 2.372169  |
| H  | 1.219796  | -0.398799 | 2.496342  |
| C  | -2.790465 | -1.835202 | 0.797730  |
| C  | -4.091831 | -1.926498 | 0.285378  |
| H  | -4.456777 | -1.198398 | -0.437147 |
| C  | -4.935275 | -2.970559 | 0.680622  |
| H  | -5.945449 | -3.028690 | 0.269551  |
| C  | -4.490902 | -3.933192 | 1.586793  |
| H  | -5.152157 | -4.746723 | 1.892791  |
| C  | -3.188346 | -3.857782 | 2.093062  |
| H  | -2.827015 | -4.613160 | 2.794326  |
| C  | -2.342850 | -2.825124 | 1.694217  |
| H  | -1.318672 | -2.796345 | 2.069217  |
| C  | -2.440265 | 0.331042  | -1.109605 |
| C  | -1.968472 | 0.258050  | -2.426006 |
| H  | -1.042899 | -0.277956 | -2.633374 |
| C  | -2.655421 | 0.902379  | -3.455831 |
| H  | -2.269737 | 0.854167  | -4.475822 |
| C  | -3.824482 | 1.615512  | -3.178977 |
| H  | -4.363772 | 2.117232  | -3.985510 |
| C  | -4.303690 | 1.690161  | -1.866722 |
| H  | -5.215881 | 2.248870  | -1.646258 |
| C  | -3.612338 | 1.055419  | -0.833769 |
| H  | -3.986006 | 1.122107  | 0.190474  |
| Rh | 0.226112  | -1.768394 | -0.286335 |
| H  | 1.124435  | -2.253405 | 1.206483  |
| Si | 2.207101  | -3.368464 | 1.182850  |
| H  | 1.562128  | -4.566867 | 1.779111  |
| H  | 2.774272  | -3.675350 | -0.149997 |
| H  | 3.254290  | -2.812832 | 2.079013  |
| C  | -0.324121 | -3.712468 | -0.950289 |
| C  | -0.887311 | -2.858762 | -1.693064 |
| H  | -0.138214 | -4.728562 | -0.623811 |
| H  | -1.613850 | -2.576537 | -2.446388 |
| C  | -0.450644 | 2.827513  | 0.365585  |

**TSc-1 (SDP)**

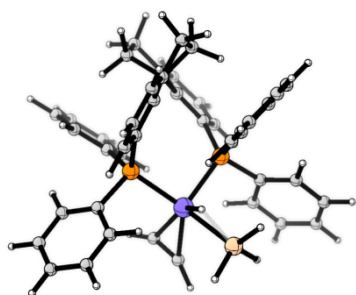

|   |           |           |           |
|---|-----------|-----------|-----------|
| P | 1.602009  | -0.000891 | -0.330201 |
| P | -1.613627 | -0.521146 | 0.246169  |
| C | -1.764305 | 3.605708  | -0.245998 |
| H | -2.628774 | 2.936992  | -0.205789 |
| H | -1.961079 | 4.434249  | 0.447674  |
| C | -1.517445 | 4.058630  | -1.689254 |
| H | -2.436720 | 4.064849  | -2.294613 |
| H | -1.098123 | 5.078245  | -1.736597 |
| C | -0.512749 | 3.059673  | -2.203663 |
| C | -0.113519 | 2.914321  | -3.529665 |
| H | -0.554405 | 3.542097  | -4.307536 |
| C | 0.860604  | 1.968316  | -3.845114 |
| H | 1.209287  | 1.850535  | -4.873210 |
| C | 1.395575  | 1.162595  | -2.841508 |
| H | 2.156623  | 0.436333  | -3.114984 |
| C | 0.985138  | 1.278669  | -1.496368 |
| C | 0.023880  | 2.265871  | -1.169017 |
| C | 0.556464  | 3.859935  | 0.707089  |
| H | 1.567755  | 3.453761  | 0.616185  |
| H | 0.524031  | 4.790034  | 0.123282  |
| C | 0.198564  | 4.050192  | 2.186947  |
| H | 1.083218  | 4.233090  | 2.815698  |
| H | -0.482444 | 4.904836  | 2.340198  |
| C | -0.493996 | 2.760649  | 2.549000  |
| C | -0.829581 | 2.341887  | 3.833722  |
| H | -0.576710 | 2.960546  | 4.698006  |
| C | -1.497359 | 1.128327  | 3.996719  |
| H | -1.790683 | 0.785635  | 4.991303  |
| C | -1.792010 | 0.340429  | 2.884311  |
| H | -2.308810 | -0.603791 | 3.041056  |
| C | -1.440690 | 0.739355  | 1.577795  |
| C | -0.795934 | 1.986364  | 1.410236  |
| C | 3.040310  | -0.842998 | -1.106705 |
| C | 4.308839  | -0.841407 | -0.505508 |
| H | 4.500760  | -0.240639 | 0.381943  |
| C | 5.337240  | -1.631499 | -1.027707 |
| H | 6.317996  | -1.621053 | -0.547644 |
| C | 5.112370  | -2.434119 | -2.146449 |
| H | 5.917545  | -3.052415 | -2.549020 |
| C | 3.847081  | -2.452069 | -2.744785 |
| H | 3.659110  | -3.086347 | -3.613639 |
| C | 2.817485  | -1.671339 | -2.226430 |
| H | 1.826178  | -1.730927 | -2.677007 |
| C | 2.294791  | 0.862883  | 1.116334  |
| C | 3.267676  | 1.856192  | 0.899386  |
| H | 3.558120  | 2.125007  | -0.118910 |

|    |           |           |           |
|----|-----------|-----------|-----------|
| C  | 3.864168  | 2.500482  | 1.982413  |
| H  | 4.621959  | 3.267210  | 1.807974  |
| C  | 3.485752  | 2.167964  | 3.288688  |
| H  | 3.950854  | 2.675542  | 4.136673  |
| C  | 2.513248  | 1.190106  | 3.506364  |
| H  | 2.204999  | 0.936523  | 4.522208  |
| C  | 1.921467  | 0.535852  | 2.423860  |
| H  | 1.148062  | -0.210625 | 2.601799  |
| C  | -2.776329 | -1.804948 | 0.872801  |
| C  | -4.053222 | -1.993861 | 0.324004  |
| H  | -4.425442 | -1.330497 | -0.455262 |
| C  | -4.860538 | -3.049213 | 0.760606  |
| H  | -5.852049 | -3.182777 | 0.322509  |
| C  | -4.404961 | -3.927435 | 1.744557  |
| H  | -5.038400 | -4.750434 | 2.082365  |
| C  | -3.128353 | -3.753761 | 2.289719  |
| H  | -2.758343 | -4.441212 | 3.053408  |
| C  | -2.317390 | -2.708539 | 1.851915  |
| H  | -1.314647 | -2.601485 | 2.267553  |
| C  | -2.490583 | 0.248189  | -1.155573 |
| C  | -2.022649 | 0.073943  | -2.463770 |
| H  | -1.092974 | -0.467883 | -2.635646 |
| C  | -2.723097 | 0.622957  | -3.539161 |
| H  | -2.341739 | 0.495765  | -4.554076 |
| C  | -3.900276 | 1.341234  | -3.315144 |
| H  | -4.449079 | 1.769123  | -4.157060 |
| C  | -4.377260 | 1.513559  | -2.010913 |
| H  | -5.297475 | 2.074116  | -1.832533 |
| C  | -3.674172 | 0.972759  | -0.933667 |
| H  | -4.046924 | 1.112050  | 0.083724  |
| Rh | 0.271383  | -1.816202 | -0.110339 |
| H  | 0.894898  | -1.846991 | 1.402329  |
| Si | 2.035242  | -3.143028 | 1.207959  |
| H  | 1.357266  | -4.270408 | 1.903680  |
| H  | 2.880518  | -3.660782 | 0.101144  |
| H  | 2.946678  | -2.456628 | 2.167925  |
| C  | 0.072317  | -3.713622 | -0.993931 |
| C  | -0.807531 | -2.949712 | -1.504176 |
| H  | 0.512468  | -4.700434 | -0.892997 |
| H  | -1.702070 | -2.828244 | -2.105106 |
| C  | -0.477823 | 2.820661  | 0.167590  |

I<sub>c</sub> (SDP)

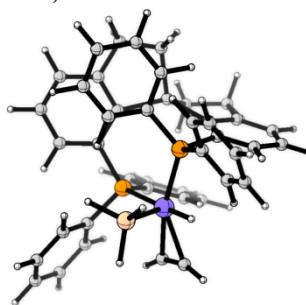

|   |          |           |           |
|---|----------|-----------|-----------|
| P | 1.923609 | -0.337419 | -0.149174 |
|---|----------|-----------|-----------|



|   |           |           |           |
|---|-----------|-----------|-----------|
| P | -1.732893 | -0.567630 | 0.151494  |
| C | -1.338700 | 3.686298  | -1.238594 |
| H | -2.200050 | 3.087367  | -1.545983 |
| H | -1.726109 | 4.628732  | -0.824862 |
| C | -0.394429 | 3.920777  | -2.434976 |
| H | -0.943807 | 4.017561  | -3.385390 |
| H | 0.154594  | 4.871070  | -2.306432 |
| C | 0.623737  | 2.796363  | -2.533505 |
| C | 1.350356  | 2.571167  | -3.709193 |
| H | 1.163611  | 3.193067  | -4.588664 |
| C | 2.313004  | 1.566404  | -3.753605 |
| H | 2.895140  | 1.399242  | -4.662517 |
| C | 2.531620  | 0.759079  | -2.635405 |
| H | 3.284247  | -0.025034 | -2.691548 |
| C | 1.797020  | 0.956188  | -1.454190 |
| C | 0.840621  | 1.999052  | -1.382406 |
| C | 0.610315  | 4.080608  | 1.066070  |
| H | 1.674248  | 3.870886  | 1.219668  |
| H | 0.545166  | 5.076265  | 0.603304  |
| C | -0.162931 | 4.015290  | 2.401452  |
| H | 0.490457  | 4.210312  | 3.266788  |
| H | -0.937532 | 4.801864  | 2.428274  |
| C | -0.849595 | 2.670269  | 2.573346  |
| C | -1.364296 | 2.268993  | 3.813812  |
| H | -1.252532 | 2.922387  | 4.682973  |
| C | -2.014121 | 1.045917  | 3.937092  |
| H | -2.425626 | 0.735026  | 4.900062  |
| C | -2.142504 | 0.203227  | 2.827999  |
| H | -2.658809 | -0.747888 | 2.945977  |
| C | -1.625333 | 0.584645  | 1.583453  |
| C | -0.979846 | 1.835681  | 1.439980  |
| C | 3.612132  | -1.082575 | -0.262515 |
| C | 4.574945  | -0.848048 | 0.731702  |
| H | 4.344386  | -0.220596 | 1.590263  |
| C | 5.842551  | -1.431964 | 0.646314  |
| H | 6.573095  | -1.242263 | 1.435609  |
| C | 6.171242  | -2.254230 | -0.431006 |
| H | 7.161759  | -2.709670 | -0.494853 |
| C | 5.217147  | -2.503033 | -1.422466 |
| H | 5.457193  | -3.154339 | -2.265614 |
| C | 3.949099  | -1.931730 | -1.332036 |
| H | 3.212378  | -2.165834 | -2.102139 |
| C | 1.959822  | 0.489858  | 1.468840  |
| C | 2.741275  | 1.642512  | 1.641645  |
| H | 3.239339  | 2.096971  | 0.782697  |
| C | 2.893661  | 2.199245  | 2.912614  |
| H | 3.503884  | 3.095667  | 3.042618  |
| C | 2.264835  | 1.612459  | 4.013995  |
| H | 2.382630  | 2.051653  | 5.007033  |
| C | 1.486525  | 0.463875  | 3.845010  |
| H | 0.988432  | 0.006365  | 4.701174  |
| C | 1.338307  | -0.098920 | 2.578207  |
| H | 0.731201  | -0.992719 | 2.452383  |
| C | -2.990519 | -1.825984 | 0.636384  |
| C | -4.252300 | -1.911222 | 0.027381  |
| H | -4.557227 | -1.180646 | -0.721186 |

|    |           |           |           |
|----|-----------|-----------|-----------|
| C  | -5.133794 | -2.943450 | 0.366579  |
| H  | -6.110407 | -2.996150 | -0.119676 |
| C  | -4.771699 | -3.898729 | 1.317251  |
| H  | -5.462671 | -4.702415 | 1.580253  |
| C  | -3.515419 | -3.823169 | 1.926551  |
| H  | -3.218349 | -4.567540 | 2.668520  |
| C  | -2.630164 | -2.801671 | 1.582776  |
| H  | -1.651011 | -2.768008 | 2.059338  |
| C  | -2.581569 | 0.435535  | -1.123741 |
| C  | -2.113544 | 0.459994  | -2.445067 |
| H  | -1.196710 | -0.066091 | -2.714632 |
| C  | -2.810913 | 1.168843  | -3.427616 |
| H  | -2.434453 | 1.185453  | -4.452400 |
| C  | -3.982286 | 1.853308  | -3.096353 |
| H  | -4.531317 | 2.401774  | -3.864819 |
| C  | -4.443843 | 1.851637  | -1.773959 |
| H  | -5.349031 | 2.402217  | -1.509260 |
| C  | -3.742121 | 1.156315  | -0.789755 |
| H  | -4.095513 | 1.170139  | 0.243344  |
| Rh | 0.206578  | -1.739371 | -0.824543 |
| H  | 1.465371  | -2.449568 | -1.418028 |
| Si | 0.881937  | -3.347133 | 0.713386  |
| H  | 2.359708  | -3.485615 | 0.819127  |
| H  | 0.373300  | -3.026590 | 2.078870  |
| H  | 0.287070  | -4.647093 | 0.291162  |
| C  | -0.323873 | -3.171180 | -2.353882 |
| C  | -1.404682 | -2.724426 | -1.915265 |
| H  | 0.335877  | -3.804641 | -2.926942 |
| H  | -2.476822 | -2.638307 | -1.817922 |
| C  | -0.228384 | 2.772505  | -0.017277 |

### TSC-2 (SDP)

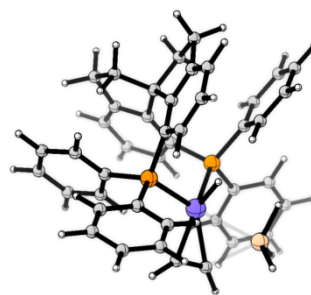

|   |           |           |           |
|---|-----------|-----------|-----------|
| P | -1.726093 | -0.122805 | 0.129060  |
| P | 1.825120  | -0.448128 | -0.161590 |
| C | 1.496017  | 3.638768  | 0.553800  |
| H | 2.419625  | 3.054322  | 0.516590  |
| H | 1.657168  | 4.532733  | -0.063903 |
| C | 1.127992  | 3.954612  | 2.005581  |
| H | 2.004119  | 3.976852  | 2.671462  |
| H | 0.631932  | 4.935786  | 2.100737  |
| C | 0.164122  | 2.856871  | 2.374138  |
| C | -0.327396 | 2.610988  | 3.654111  |
| H | 0.029552  | 3.200548  | 4.501713  |
| C | -1.295474 | 1.625621  | 3.827104  |

|   |           |           |           |
|---|-----------|-----------|-----------|
| H | -1.722449 | 1.431032  | 4.813228  |
| C | -1.732434 | 0.883121  | 2.730645  |
| H | -2.503005 | 0.135500  | 2.896749  |
| C | -1.219050 | 1.087654  | 1.433415  |
| C | -0.255026 | 2.112397  | 1.252254  |
| C | -0.755463 | 3.753380  | -0.588820 |
| H | -1.733564 | 3.266004  | -0.593275 |
| H | -0.844904 | 4.655764  | 0.031826  |
| C | -0.305138 | 4.039136  | -2.027193 |
| H | -1.152225 | 4.164068  | -2.718420 |
| H | 0.299679  | 4.959630  | -2.095815 |
| C | 0.541000  | 2.841649  | -2.377313 |
| C | 1.039365  | 2.534759  | -3.641252 |
| H | 0.792257  | 3.166070  | -4.498110 |
| C | 1.868804  | 1.424053  | -3.789703 |
| H | 2.290432  | 1.172066  | -4.765077 |
| C | 2.165487  | 0.624707  | -2.685729 |
| H | 2.807573  | -0.241728 | -2.832067 |
| C | 1.647620  | 0.905266  | -1.404151 |
| C | 0.827134  | 2.046230  | -1.248574 |
| C | -3.158332 | -1.066316 | 0.810299  |
| C | -4.409209 | -1.087380 | 0.176959  |
| H | -4.598770 | -0.461265 | -0.693480 |
| C | -5.424234 | -1.931694 | 0.640658  |
| H | -6.389969 | -1.938579 | 0.130780  |
| C | -5.206633 | -2.761302 | 1.740095  |
| H | -6.002291 | -3.416536 | 2.100860  |
| C | -3.957340 | -2.758427 | 2.371534  |
| H | -3.772415 | -3.412732 | 3.226281  |
| C | -2.940520 | -1.929545 | 1.904279  |
| H | -1.961879 | -1.969295 | 2.385456  |
| C | -2.428877 | 0.826989  | -1.259463 |
| C | -3.480367 | 1.730542  | -1.018246 |
| H | -3.853415 | 1.875554  | -0.001811 |
| C | -4.040231 | 2.452663  | -2.070987 |
| H | -4.855460 | 3.152897  | -1.876864 |
| C | -3.550769 | 2.285637  | -3.372504 |
| H | -3.988401 | 2.853586  | -4.196527 |
| C | -2.502040 | 1.396757  | -3.615243 |
| H | -2.108661 | 1.271654  | -4.625869 |
| C | -1.943884 | 0.667797  | -2.561890 |
| H | -1.113624 | -0.012825 | -2.757133 |
| C | 3.245319  | -1.470113 | -0.738172 |
| C | 4.540394  | -1.328141 | -0.221085 |
| H | 4.749085  | -0.602730 | 0.563609  |
| C | 5.580846  | -2.136827 | -0.690495 |
| H | 6.582517  | -2.020181 | -0.271194 |
| C | 5.342078  | -3.089467 | -1.681667 |
| H | 6.156657  | -3.719339 | -2.045655 |
| C | 4.050834  | -3.242792 | -2.198276 |
| H | 3.851707  | -3.992898 | -2.966722 |
| C | 3.009732  | -2.446718 | -1.723482 |
| H | 2.000654  | -2.590036 | -2.114783 |
| C | 2.336579  | 0.213387  | 1.455994  |
| C | 1.714971  | -0.269883 | 2.616237  |
| H | 0.903485  | -0.994461 | 2.533928  |

|    |           |           |           |
|----|-----------|-----------|-----------|
| C  | 2.112625  | 0.192485  | 3.870896  |
| H  | 1.612779  | -0.177649 | 4.767921  |
| C  | 3.139737  | 1.133764  | 3.976555  |
| H  | 3.449346  | 1.497340  | 4.958839  |
| C  | 3.773444  | 1.610143  | 2.824441  |
| H  | 4.580626  | 2.341568  | 2.904429  |
| C  | 3.375145  | 1.151823  | 1.567815  |
| H  | 3.873512  | 1.525786  | 0.671551  |
| Rh | -0.082288 | -1.747459 | -0.131340 |
| H  | -0.129741 | -1.151513 | -1.534000 |
| Si | -1.839381 | -3.429175 | -1.096477 |
| H  | -1.300282 | -4.557798 | -1.902911 |
| H  | -3.022876 | -3.865864 | -0.321490 |
| H  | -2.251026 | -2.376074 | -2.067854 |
| C  | -0.385117 | -3.807509 | 0.443659  |
| C  | 0.854172  | -3.394490 | 0.542332  |
| H  | -0.929674 | -4.672235 | 0.842485  |
| H  | 1.799574  | -3.744880 | 0.953730  |
| C  | 0.315988  | 2.779071  | -0.005270 |

II<sub>c</sub> (SDP)

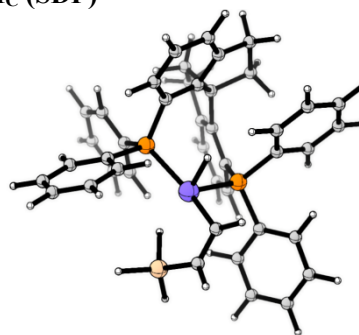

|   |           |           |           |
|---|-----------|-----------|-----------|
| P | -1.808975 | 0.188435  | -0.295905 |
| P | 1.686153  | 0.147333  | 0.218965  |
| C | -0.283387 | -2.857475 | 0.090298  |
| C | 0.856916  | -3.816796 | -0.376806 |
| H | 1.808832  | -3.280029 | -0.384816 |
| H | 0.968186  | -4.665014 | 0.313179  |
| C | 0.479924  | -4.237054 | -1.807036 |
| H | 1.361201  | -4.371103 | -2.452156 |
| H | -0.073010 | -5.191989 | -1.823363 |
| C | -0.416172 | -3.119873 | -2.281072 |
| C | -0.919773 | -2.939647 | -3.570801 |
| H | -0.620882 | -3.613360 | -4.377562 |
| C | -1.829950 | -1.909041 | -3.809053 |
| H | -2.255153 | -1.768531 | -4.805175 |
| C | -2.199355 | -1.046226 | -2.773540 |
| H | -2.895119 | -0.233307 | -2.982046 |
| C | -1.669117 | -1.196220 | -1.479979 |
| C | -0.776286 | -2.260264 | -1.229438 |
| C | -1.467755 | -3.716312 | 0.645394  |
| H | -2.399081 | -3.148867 | 0.541822  |
| H | -1.585817 | -4.643547 | 0.068492  |
| C | -1.162136 | -3.941780 | 2.124791  |
| H | -2.069359 | -3.983868 | 2.746757  |



|    |           |           |           |
|----|-----------|-----------|-----------|
| H  | -0.613160 | -4.883854 | 2.296108  |
| C  | -0.287494 | -2.768774 | 2.478631  |
| C  | 0.076015  | -2.412328 | 3.775516  |
| H  | -0.316479 | -2.974008 | 4.626328  |
| C  | 0.955578  | -1.351564 | 3.965236  |
| H  | 1.279549  | -1.065311 | 4.967992  |
| C  | 1.435496  | -0.650688 | 2.859983  |
| H  | 2.139410  | 0.157611  | 3.036077  |
| C  | 1.052816  | -0.973325 | 1.541135  |
| C  | 0.174398  | -2.073999 | 1.339400  |
| C  | -2.903911 | 1.473056  | -1.010209 |
| C  | -4.091515 | 1.889285  | -0.391135 |
| H  | -4.489138 | 1.333921  | 0.459172  |
| C  | -4.762544 | 3.024877  | -0.853352 |
| H  | -5.691018 | 3.335715  | -0.369228 |
| C  | -4.250274 | 3.766461  | -1.922072 |
| H  | -4.777001 | 4.656455  | -2.272816 |
| C  | -3.062751 | 3.365864  | -2.541101 |
| H  | -2.656197 | 3.938142  | -3.377612 |
| C  | -2.394389 | 2.224765  | -2.093231 |
| H  | -1.484492 | 1.901145  | -2.610595 |
| C  | -2.626373 | -0.350200 | 1.233475  |
| C  | -3.748839 | -1.193399 | 1.207624  |
| H  | -4.142334 | -1.549606 | 0.252491  |
| C  | -4.359277 | -1.576825 | 2.402860  |
| H  | -5.230329 | -2.235461 | 2.382168  |
| C  | -3.856053 | -1.116410 | 3.625196  |
| H  | -4.333364 | -1.421112 | 4.559273  |
| C  | -2.747569 | -0.265494 | 3.652290  |
| H  | -2.352759 | 0.091628  | 4.605437  |
| C  | -2.134038 | 0.118438  | 2.458979  |
| H  | -1.253097 | 0.762349  | 2.476855  |
| C  | 2.939556  | 1.272120  | 0.952444  |
| C  | 4.221916  | 1.379283  | 0.394467  |
| H  | 4.539251  | 0.703373  | -0.398505 |
| C  | 5.102268  | 2.371233  | 0.837181  |
| H  | 6.097035  | 2.442826  | 0.392263  |
| C  | 4.713863  | 3.266977  | 1.833521  |
| H  | 5.403613  | 4.041454  | 2.175530  |
| C  | 3.432094  | 3.173716  | 2.387002  |
| H  | 3.114131  | 3.877048  | 3.159457  |
| C  | 2.549990  | 2.191678  | 1.944372  |
| H  | 1.544391  | 2.155245  | 2.363804  |
| C  | 2.630413  | -0.929958 | -0.910382 |
| C  | 2.366648  | -1.037185 | -2.279043 |
| H  | 1.565080  | -0.451245 | -2.730166 |
| C  | 3.117700  | -1.909565 | -3.072098 |
| H  | 2.897247  | -1.992638 | -4.138204 |
| C  | 4.139887  | -2.671409 | -2.503560 |
| H  | 4.726530  | -3.351234 | -3.125348 |
| C  | 4.411956  | -2.565312 | -1.134099 |
| H  | 5.208033  | -3.162087 | -0.684093 |
| C  | 3.658193  | -1.704691 | -0.338659 |
| H  | 3.860859  | -1.642374 | 0.732783  |
| Rh | 0.146211  | 1.495018  | -0.619954 |
| H  | 0.396013  | 0.618996  | -1.844180 |

|    |           |          |           |
|----|-----------|----------|-----------|
| Si | 0.014751  | 4.163097 | 0.505203  |
| H  | -0.380568 | 2.692668 | 0.799222  |
| H  | 0.559552  | 4.617007 | 1.812953  |
| H  | -1.271940 | 4.856844 | 0.228844  |
| C  | 1.245548  | 4.097501 | -0.894267 |
| C  | 1.470383  | 2.847656 | -1.349011 |
| H  | 1.755113  | 4.982220 | -1.302491 |
| H  | 2.226982  | 2.641656 | -2.118543 |

### TS<sub>C</sub>-3 (SDP)

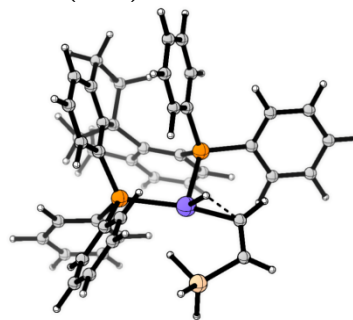

|   |           |           |           |
|---|-----------|-----------|-----------|
| P | -1.643260 | 0.119378  | -0.237207 |
| P | 1.788443  | 0.295346  | 0.094085  |
| C | 0.017464  | -2.841177 | 0.480982  |
| C | 1.130159  | -3.885783 | 0.145997  |
| H | 2.098878  | -3.381260 | 0.086151  |
| H | 1.211758  | -4.643008 | 0.937825  |
| C | 0.745617  | -4.469921 | -1.220624 |
| H | 1.622260  | -4.694504 | -1.847240 |
| H | 0.180309  | -5.412090 | -1.119285 |
| C | -0.130607 | -3.405132 | -1.831212 |
| C | -0.619078 | -3.383311 | -3.136323 |
| H | -0.331896 | -4.163891 | -3.844731 |
| C | -1.493612 | -2.365873 | -3.514747 |
| H | -1.910687 | -2.341354 | -4.523792 |
| C | -1.839613 | -1.366759 | -2.604011 |
| H | -2.520966 | -0.582725 | -2.927644 |
| C | -1.330118 | -1.355775 | -1.290763 |
| C | -0.475131 | -2.409553 | -0.898257 |
| C | -1.150133 | -3.594634 | 1.195335  |
| H | -2.082935 | -3.041475 | 1.054691  |
| H | -1.295782 | -4.593897 | 0.762634  |
| C | -0.773039 | -3.614319 | 2.679266  |
| H | -1.649472 | -3.542707 | 3.341191  |
| H | -0.236858 | -4.537440 | 2.959031  |
| C | 0.140321  | -2.424865 | 2.823078  |
| C | 0.589219  | -1.897388 | 4.031129  |
| H | 0.253184  | -2.328640 | 4.977036  |
| C | 1.481144  | -0.828239 | 4.009775  |
| H | 1.871452  | -0.407807 | 4.938913  |
| C | 1.882302  | -0.287968 | 2.789374  |
| H | 2.585459  | 0.538668  | 2.808330  |
| C | 1.416521  | -0.786110 | 1.552595  |
| C | 0.534212  | -1.897156 | 1.574345  |
| C | -2.855723 | 1.148955  | -1.170578 |
| C | -4.135885 | 1.436004  | -0.677997 |

|    |           |           |           |
|----|-----------|-----------|-----------|
| H  | -4.492041 | 0.969063  | 0.239804  |
| C  | -4.966160 | 2.339118  | -1.351772 |
| H  | -5.960932 | 2.552782  | -0.954551 |
| C  | -4.530707 | 2.962323  | -2.521872 |
| H  | -5.182264 | 3.665158  | -3.045446 |
| C  | -3.250677 | 2.688320  | -3.016257 |
| H  | -2.896945 | 3.177517  | -3.926434 |
| C  | -2.416806 | 1.798445  | -2.341179 |
| H  | -1.411473 | 1.612312  | -2.722981 |
| C  | -2.552609 | -0.432504 | 1.243572  |
| C  | -3.682446 | -1.262530 | 1.145657  |
| H  | -4.019367 | -1.610984 | 0.166426  |
| C  | -4.366989 | -1.650033 | 2.297339  |
| H  | -5.244188 | -2.295840 | 2.218003  |
| C  | -3.925962 | -1.215998 | 3.553988  |
| H  | -4.461538 | -1.523757 | 4.454893  |
| C  | -2.802234 | -0.392856 | 3.656364  |
| H  | -2.450817 | -0.060732 | 4.635273  |
| C  | -2.117195 | -0.001405 | 2.503187  |
| H  | -1.223362 | 0.622422  | 2.586271  |
| C  | 3.396466  | 1.136395  | 0.431574  |
| C  | 4.546129  | 0.875466  | -0.330807 |
| H  | 4.522388  | 0.148089  | -1.139769 |
| C  | 5.739753  | 1.557208  | -0.074212 |
| H  | 6.622037  | 1.338031  | -0.679356 |
| C  | 5.804626  | 2.511691  | 0.940996  |
| H  | 6.739082  | 3.040535  | 1.140506  |
| C  | 4.658997  | 2.801146  | 1.688835  |
| H  | 4.689605  | 3.564021  | 2.469704  |
| C  | 3.465389  | 2.130850  | 1.427860  |
| H  | 2.571345  | 2.409215  | 1.986246  |
| C  | 2.113566  | -0.695944 | -1.394609 |
| C  | 1.496225  | -0.353656 | -2.605098 |
| H  | 0.773055  | 0.461401  | -2.627272 |
| C  | 1.792032  | -1.065093 | -3.767924 |
| H  | 1.294683  | -0.803698 | -4.703582 |
| C  | 2.715329  | -2.112836 | -3.732135 |
| H  | 2.945384  | -2.669430 | -4.643243 |
| C  | 3.349850  | -2.446471 | -2.531428 |
| H  | 4.081980  | -3.256399 | -2.503297 |
| C  | 3.051872  | -1.740308 | -1.365828 |
| H  | 3.563025  | -1.989972 | -0.434365 |
| Rh | 0.073125  | 1.761209  | 0.062418  |
| H  | 0.625590  | 2.469949  | -1.200392 |
| Si | -1.308439 | 4.312998  | 0.411214  |
| H  | -1.427426 | 2.774402  | 0.415638  |
| H  | -1.873024 | 4.709025  | 1.728729  |
| H  | -2.198019 | 4.741589  | -0.697552 |
| C  | 0.508480  | 4.636260  | 0.172898  |
| C  | 1.203719  | 3.506997  | -0.091050 |
| H  | 0.999681  | 5.614873  | 0.248559  |
| H  | 2.280591  | 3.541808  | -0.286639 |

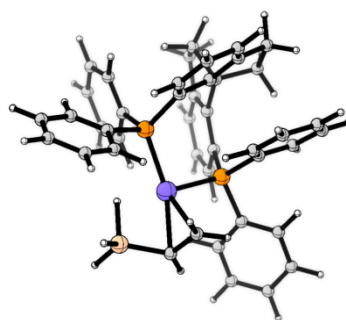

|   |           |           |           |
|---|-----------|-----------|-----------|
| P | -1.671022 | 0.288505  | -0.127538 |
| P | 1.681566  | 0.186973  | 0.156357  |
| C | -0.141412 | -2.889760 | 0.011631  |
| C | 0.945151  | -3.867741 | -0.538033 |
| H | 1.923114  | -3.378822 | -0.514780 |
| H | 1.018967  | -4.767697 | 0.087753  |
| C | 0.531355  | -4.159779 | -1.986279 |
| H | 1.395279  | -4.280885 | -2.657485 |
| H | -0.063965 | -5.085524 | -2.065122 |
| C | -0.311974 | -2.967071 | -2.361927 |
| C | -0.784177 | -2.661495 | -3.635419 |
| H | -0.522027 | -3.293433 | -4.487143 |
| C | -1.606161 | -1.547468 | -3.799902 |
| H | -2.010924 | -1.297216 | -4.782895 |
| C | -1.915441 | -0.739889 | -2.705835 |
| H | -2.556590 | 0.122658  | -2.869900 |
| C | -1.425431 | -1.016971 | -1.412091 |
| C | -0.623674 | -2.168942 | -1.243185 |
| C | -1.315599 | -3.753680 | 0.572345  |
| H | -2.242825 | -3.174986 | 0.539235  |
| H | -1.471932 | -4.651705 | -0.040818 |
| C | -0.936218 | -4.059057 | 2.025239  |
| H | -1.810333 | -4.091930 | 2.693471  |
| H | -0.424434 | -5.031856 | 2.122558  |
| C | 0.006390  | -2.939376 | 2.386612  |
| C | 0.484931  | -2.660613 | 3.663346  |
| H | 0.154006  | -3.255438 | 4.517816  |
| C | 1.402051  | -1.624412 | 3.825772  |
| H | 1.817194  | -1.397815 | 4.810113  |
| C | 1.795700  | -0.865589 | 2.724891  |
| H | 2.515087  | -0.069146 | 2.890005  |
| C | 1.299095  | -1.108589 | 1.426202  |
| C | 0.399127  | -2.189334 | 1.258069  |
| C | -3.026067 | 1.357624  | -0.780729 |
| C | -4.313597 | 1.381969  | -0.229181 |
| H | -4.576701 | 0.716570  | 0.592014  |
| C | -5.272431 | 2.278458  | -0.714383 |
| H | -6.270964 | 2.287481  | -0.271965 |
| C | -4.958556 | 3.156832  | -1.752042 |
| H | -5.710312 | 3.854155  | -2.127926 |
| C | -3.672250 | 3.146042  | -2.303366 |
| H | -3.414432 | 3.835408  | -3.110415 |
| C | -2.713284 | 2.260343  | -1.816022 |
| H | -1.704811 | 2.272265  | -2.236140 |
| C | -2.349009 | -0.446383 | 1.393343  |

**P<sub>c</sub> (SDP)**

|    |           |           |           |
|----|-----------|-----------|-----------|
| C  | -3.431837 | -1.340420 | 1.368030  |
| H  | -3.868999 | -1.643042 | 0.413843  |
| C  | -3.951620 | -1.842199 | 2.561928  |
| H  | -4.792888 | -2.538362 | 2.538458  |
| C  | -3.394028 | -1.455226 | 3.786028  |
| H  | -3.799832 | -1.853166 | 4.718826  |
| C  | -2.321474 | -0.560400 | 3.815595  |
| H  | -1.881181 | -0.261702 | 4.768793  |
| C  | -1.802390 | -0.053967 | 2.623052  |
| H  | -0.950792 | 0.629983  | 2.638401  |
| C  | 3.226594  | 1.017054  | 0.734917  |
| C  | 4.452649  | 0.896487  | 0.064537  |
| H  | 4.541607  | 0.264172  | -0.817409 |
| C  | 5.576559  | 1.600900  | 0.509396  |
| H  | 6.522028  | 1.495806  | -0.027090 |
| C  | 5.493637  | 2.432428  | 1.626526  |
| H  | 6.374058  | 2.977874  | 1.972849  |
| C  | 4.272390  | 2.572173  | 2.294429  |
| H  | 4.193479  | 3.228771  | 3.163763  |
| C  | 3.148049  | 1.880783  | 1.845372  |
| H  | 2.193475  | 2.019054  | 2.357090  |
| C  | 2.150830  | -0.592912 | -1.421436 |
| C  | 1.581439  | -0.118774 | -2.610999 |
| H  | 0.815965  | 0.656251  | -2.565882 |
| C  | 1.965094  | -0.660588 | -3.838077 |
| H  | 1.503958  | -0.297435 | -4.758330 |
| C  | 2.927539  | -1.672154 | -3.885795 |
| H  | 3.227976  | -2.096383 | -4.846415 |
| C  | 3.508319  | -2.142552 | -2.703111 |
| H  | 4.264212  | -2.930138 | -2.738430 |
| C  | 3.122279  | -1.605817 | -1.474152 |
| H  | 3.582756  | -1.970301 | -0.553471 |
| Rh | 0.077558  | 1.789508  | 0.114015  |
| H  | 0.797544  | 3.192237  | -2.012876 |
| Si | -0.533819 | 4.299279  | 0.461479  |
| H  | -1.252867 | 2.887956  | 0.648816  |
| H  | -0.683987 | 4.949506  | 1.784264  |
| H  | -1.291648 | 4.972352  | -0.620231 |
| C  | 1.183891  | 3.759588  | 0.053303  |
| C  | 1.437210  | 3.076625  | -1.131068 |
| H  | 1.987588  | 3.835246  | 0.790549  |
| H  | 2.437438  | 2.682423  | -1.3327   |

## 11. References.

- [1]. Stavrakov, G, Breit, B. From Central to Axial to Central Chirality: Enantioselective Construction of the *trans*-4,5,9,10-Tetrahydroxy-9,10-dihydrophenanthrene System. *Eur. J. Org. Chem.* **2007**, *34*, 5726.
- [2]. Chang, X.; Ma, P. L.; Chen, H. C.; Li, C. Y.; Wang, P. Asymmetric Synthesis and Application of Chiral Spirosilabiindanes. *Angew. Chem.* **2020**, *132*, 9022.
- [3]. Nguyen, T. A.; Roger, J. L.; Hierso, J. C. Gold(I) Complexes Nuclearity in Constrained Ferrocenyl Diphosphines: Dramatic Effect in Gold-Catalyzed Enyne Cycloisomerization. *Chem. Asian J.* **2020**, *15*, 2879.
- [4] Fan, B. M.; Xie, J. X.; Li, S.; Wang, L. X.; Zhou, Q. L. Highly Enantioselective Hydrosilylation/Cyclization of 1,6-Enynes Catalyzed by Rhodium(I) Complexes of Spiro Diphosphines. *Angew. Chem. Int. Ed.* **2007**, *46*, 1275.
- [5] (a) Zhou, Y.; Nikbakht, A.; Bauer, B.; Breit, B. A rhodium catalyzed cycloisomerization and tandem Diels-Alder reaction for facile access to diverse bicyclic and tricyclic heterocycles. *Chem. Sci.* **2019**, *10*, 4805. (b) Wu, R.; Chen, K.; Ma, J.; Yu, Z. X.; Zhu, S. Synergy of activating substrate and introducing C-H $\cdots$ O interaction to achieve Rh<sub>2</sub>(II)-catalyzed asymmetric cycloisomerization of 1,*n*-enynes. *Sci. China. Chem.* **2020**, *63*, 1230.
- [6] Blicke, R.; Perego, L.; Ciofini, I.; Grimaud, L.; Taillefer, M.; Monnier, F. Copper-Catalysed Hydroamination of *N*-Allenylsulfonamides: The Key Role of Ancillary Coordinating Groups. *Synthesis.* **2019**, *51*, 1225.
- [7] Andrew, W.; Alexa, T.; Bijan, M.; Liher, P.; Mark, L. Cobalt-Catalyzed Enantioselective Hydroarylation of 1,6-Enynes. *J. Am. Chem. Soc.* **2020**, *142*, 9510.
- [8] Campolo, D.; Arif, T.; Borie, C.; Mouysset, D.; Vanthuyne, N.; Naubron, J. V.; Bertrand, M. P.; Nechab, M. Double Transfer of Chirality in Organocopper-Mediated bis(Alkylating) Cycloisomerization of Ene-diyne. *Angew. Chem. Int. Ed.* **2014**, *53*, 3227.
- [9] Cabrera-Lobera, N.; Quirós, M. T.; Brennessel, W. W.; Neidig, M. L.; Buñuel, E.; Cárdenas, D. J. Atom-Economical Ni-Catalyzed Diborylative Cyclization of Enynes: Preparation of Unsymmetrical Diboronates. *Org. Lett.* **2019**, *21*, 6552.
- [10] (a) Tan, Y. X.; Li, S. J.; Song, L. J.; Zhang, X. H.; Wu, Y. D.; Sun, J. W. Ruthenium-Catalyzed Geminal Hydroborative Cyclization of Enynes. *Angew. Chem. Int. Ed.* **2022**, *61*, e202204319. (b) Gandhamsetty, N.; Park, S.; Chang, S. Selective Silylative Reduction of Pyridines Leading to Structurally Diverse Azacyclic Compounds with the Formation of sp<sup>3</sup> C-Si Bonds. *J. Am. Chem. Soc.* **2015**, *137*, 15176.
- [11] Trost, B. M.; Ball, Z. T. Markovnikov Alkyne Hydrosilylation Catalyzed by Ruthenium Complexes. *J. Am. Chem. Soc.* **2001**, *123*, 12726.
- [12] Gaussian 16, Revision A.03, Frisch, M. J.; Trucks, G. W.; Schlegel, H. B.; Scuseria, G. E.; Robb, M. A.; Cheeseman, J. R.; Scalmani, G.; Barone, V.; Petersson, G. A.; Nakatsuji, H.; Li, X.; Caricato, M.; Marenich, A. V.; Bloino, J.; Janesko, B. G.; Gomperts, R.; Mennucci, B.; Hratchian, H. P.; Ortiz, J. V.; Izmaylov, A. F.; Sonnenberg, J. L.; Williams-Young, D.; Ding, F.; Lipparini, F.; Egidi, F.; Goings, J.; Peng, B.; Petrone, A.; Henderson, T.; Ranasinghe, D.; Zakrzewski, V. G.; Gao, J.; Rega, N.; Zheng, G.; Liang, W.; Hada, M.; Ehara, M.; Toyota, K.; Fukuda, R.; Hasegawa, J.; Ishida, M.; Nakajima, T.; Honda, Y.; Kitao, O.; Nakai, H.; Vreven, T.; Throssell, K.; Montgomery, J. A., Jr.; Peralta, J. E.; Ogliaro, F.; Bearpark, M. J.; Heyd, J. J.; Brothers, E. N.; Kudin, K. N.; Staroverov, V. N.; Keith, T. A.; Kobayashi, R.; Normand, J.; Raghavachari, K.;

Rendell, A. P.; Burant, J. C.; Iyengar, S. S.; Tomasi, J.; Cossi, M.; Millam, J. M.; Klene, M.; Adamo, C.; Cammi, R.; Ochterski, J. W.; Martin, R. L.; Morokuma, K.; Farkas, O.; Foresman, J. B.; Fox, D. J. Gaussian, Inc., Wallingford CT, **2016**.

[13] Neese, F.; Wennmohs, F.; Becker, U.; Riplinger, C. The ORCA quantum chemistry program package. *J. Chem. Phys.* **2020**, *152*, 224108.

[14] (a) Becke, A. D., Density-functional thermochemistry. III. The role of exact exchange. *J. Chem. Phys.* **1993**, *98*, 5648. (b) Lee, C.; Yang, W.; Parr, R. G. Development of the Colle-Salvetti correlation-energy formula into a functional of the electron density. *Phys. Rev. B*, **1988**, *37*, 785.

[15] Becke, A. D.; Johnson, E. R. A density-functional model of the dispersion interaction. *J. Chem. Phys.* **2005**, *123*, 154101.

[16] Weigend, F.; Ahlrichs, R., Balanced basis sets of split valence, triple zeta valence and quadruple zeta valence quality for H to Rn: Design and assessment of accuracy. *Phys. Chem. Chem. Phys.* **2005**, *7*, 3297.

[17] Fukui, K. The path of chemical reactions-the IRC approach. *Acc. Chem. Res.* **1981**, *14*, 363.

[18] Zhao, Y.; Truhlar, D. G. The M06 Suite of Density Functionals for Main Group Thermochemistry, Thermochemical Kinetics, Noncovalent Interactions, Excited States, and Transition Elements. *Theor. Chem. Acc.* **2008**, *120*, 215.

[19] CYLview20; Legault, C. Y., Université de Sherbrooke, **2020** (<http://www.cylview.org>).

## 12. NMR Spectra.

(S)-2,2',3,3'-tetrahydro-1,1'-spirobi[benzo**b**]silole]-7,7'-diyl bis(trifluoromethanesulfonate)  
(S)-S2

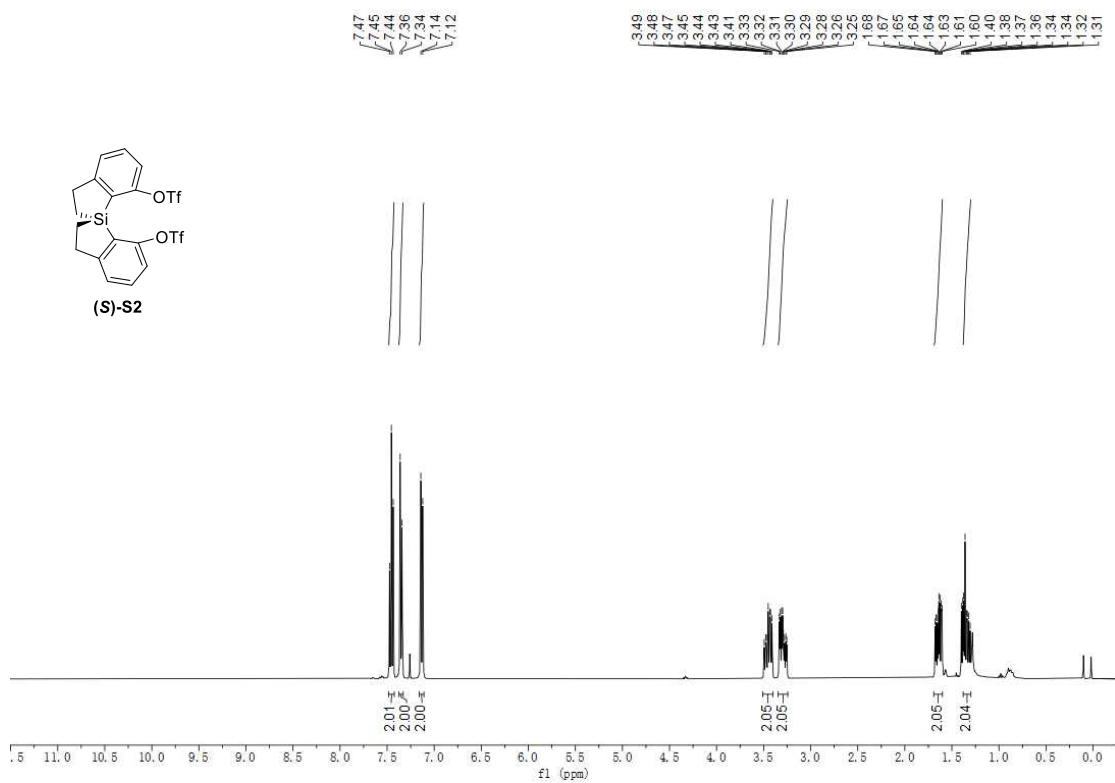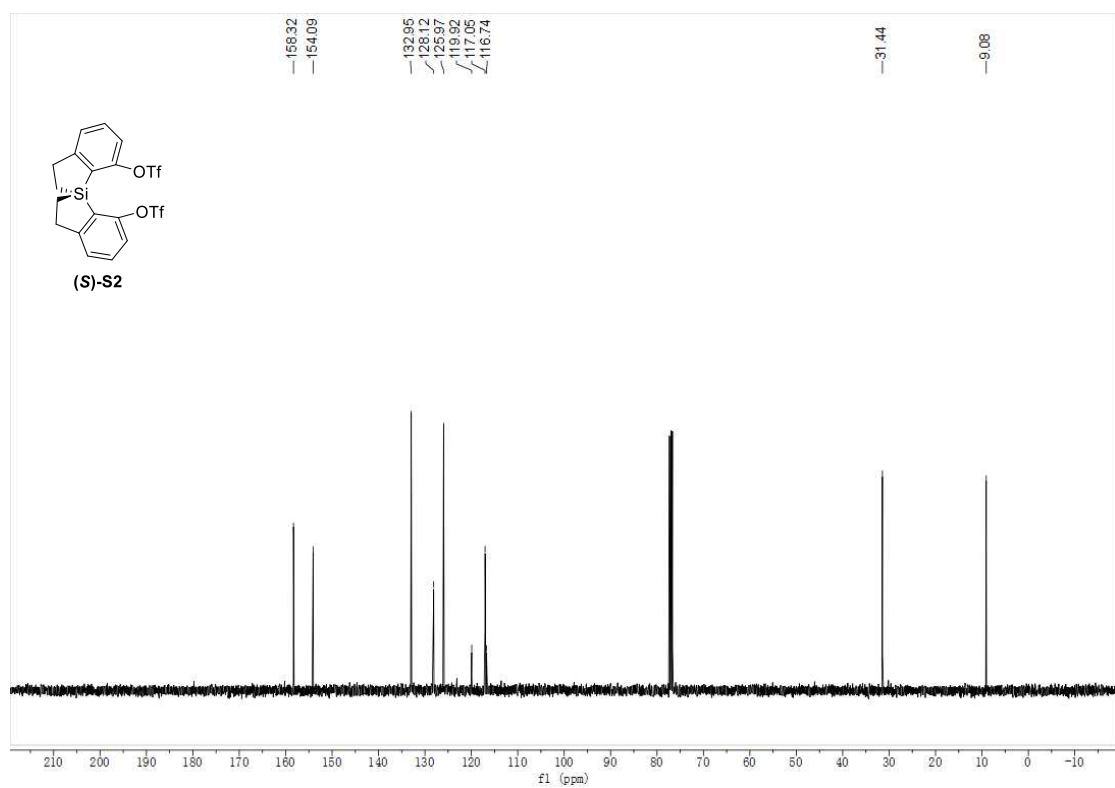

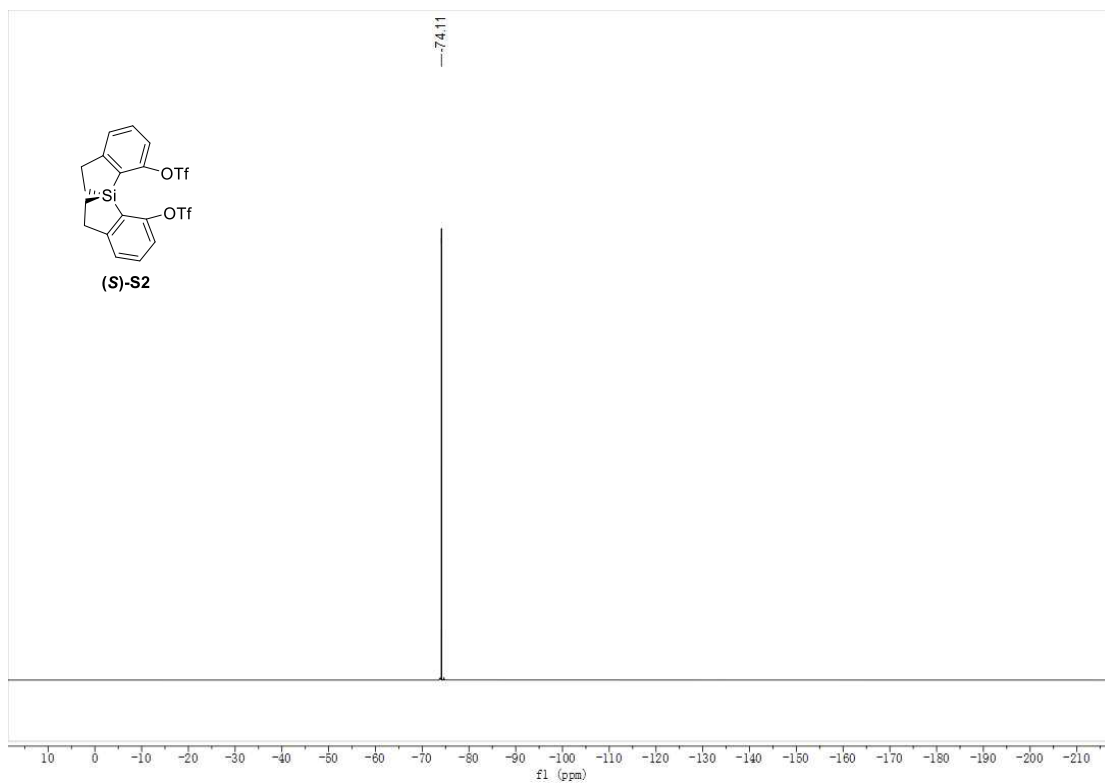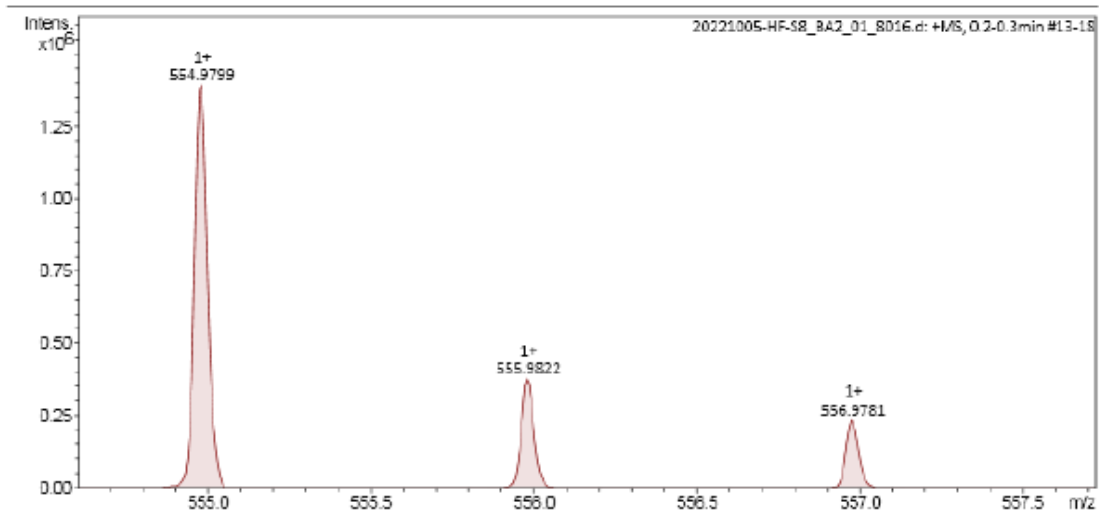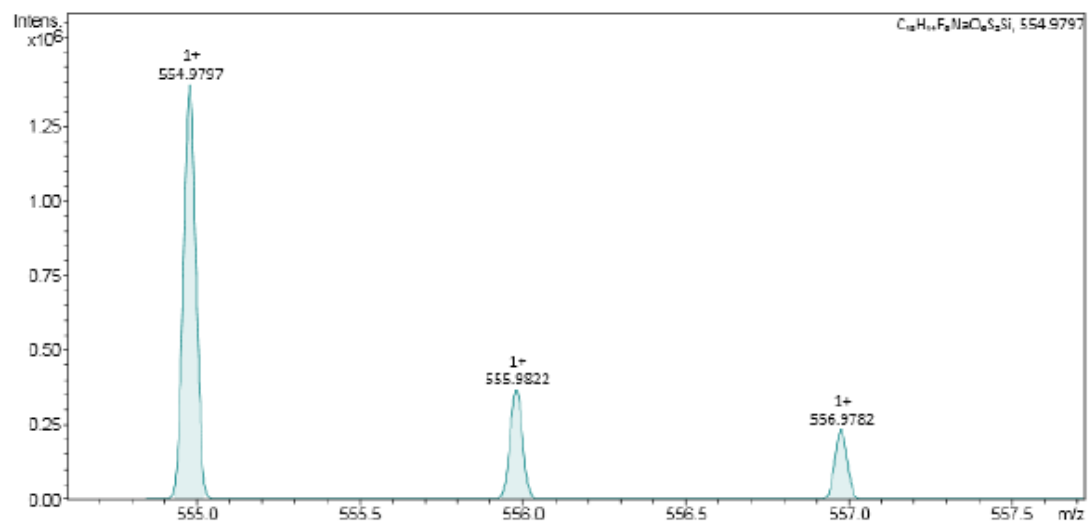

**(S)-(2,2',3,3'-tetrahydro-1,1'-spiro[benzo[b]silole]-7,7'-diyl)bis(diphenylphosphine oxide)**  
**((S)-S3-1)**

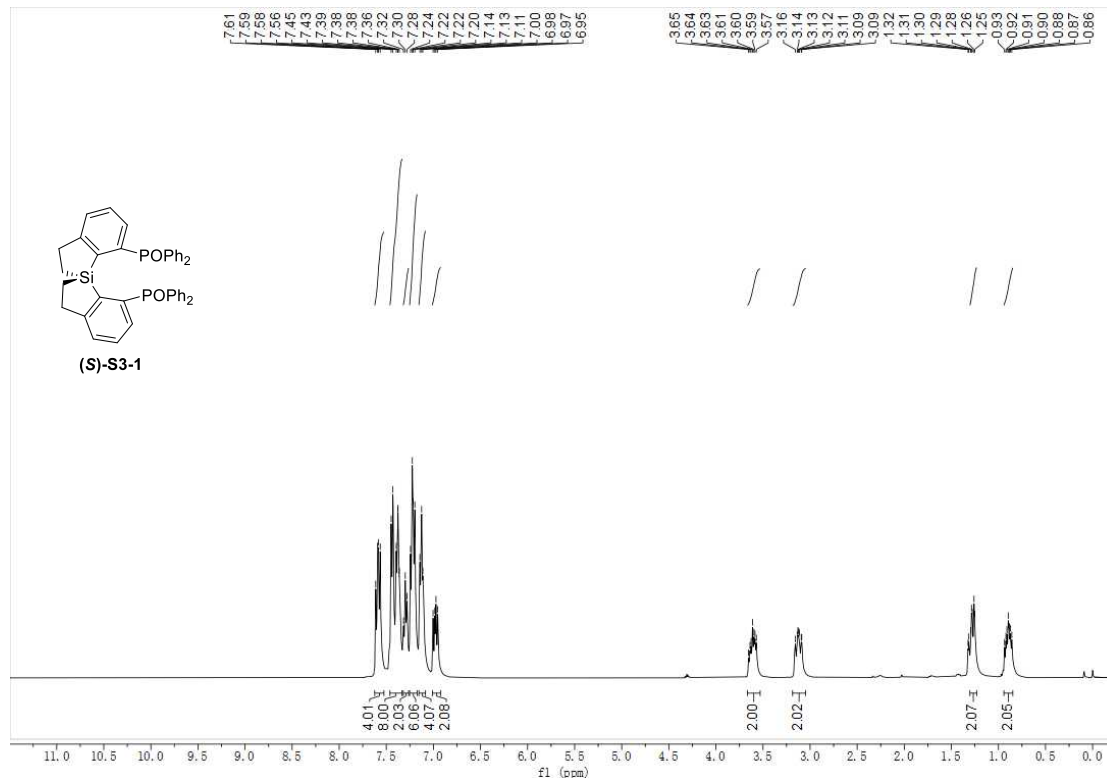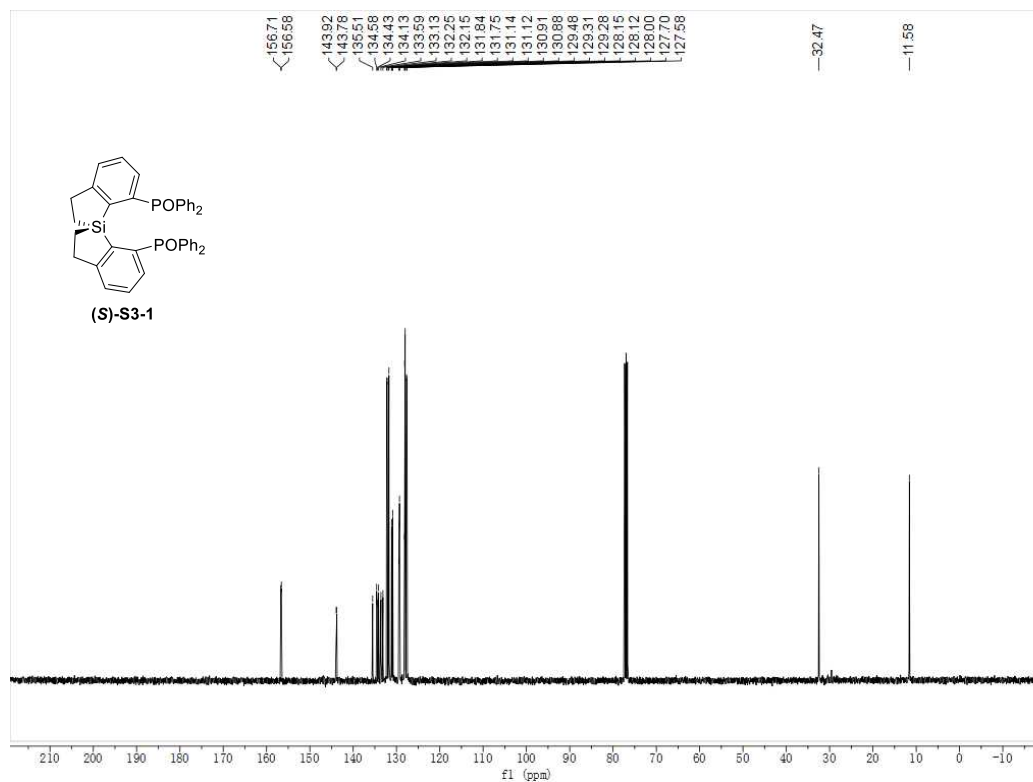



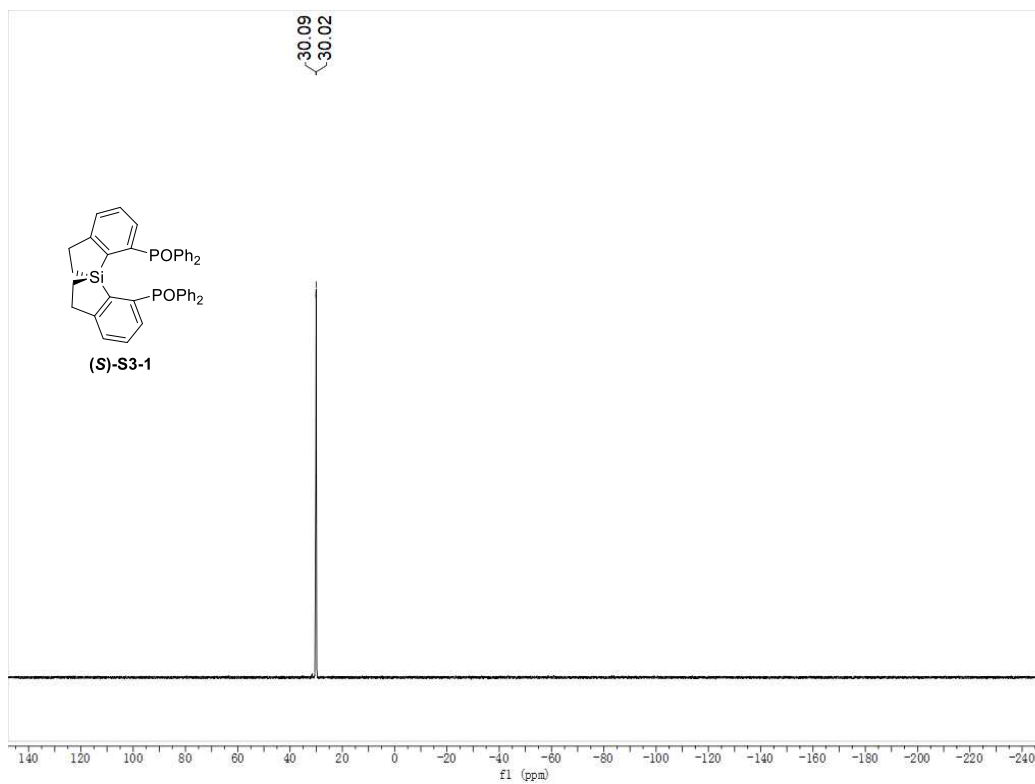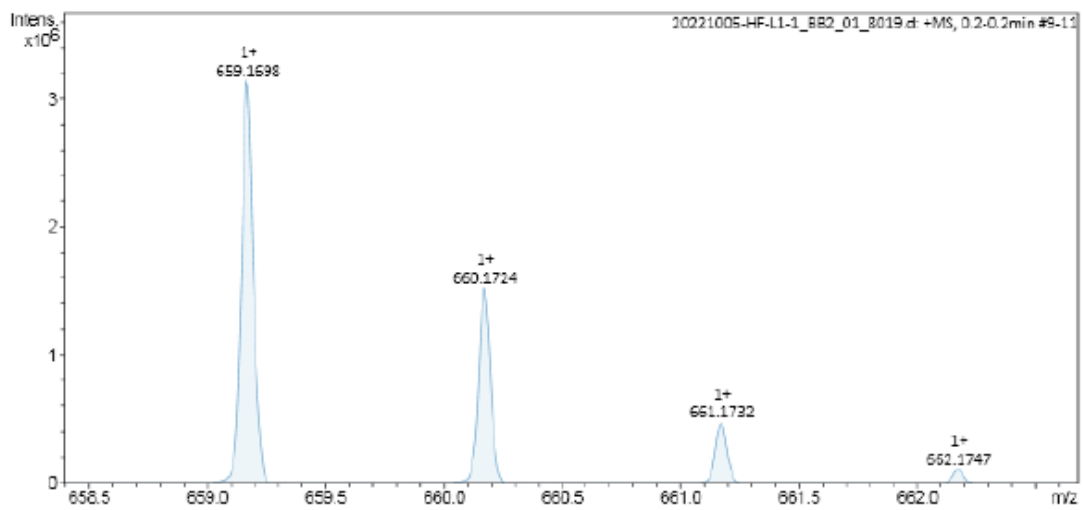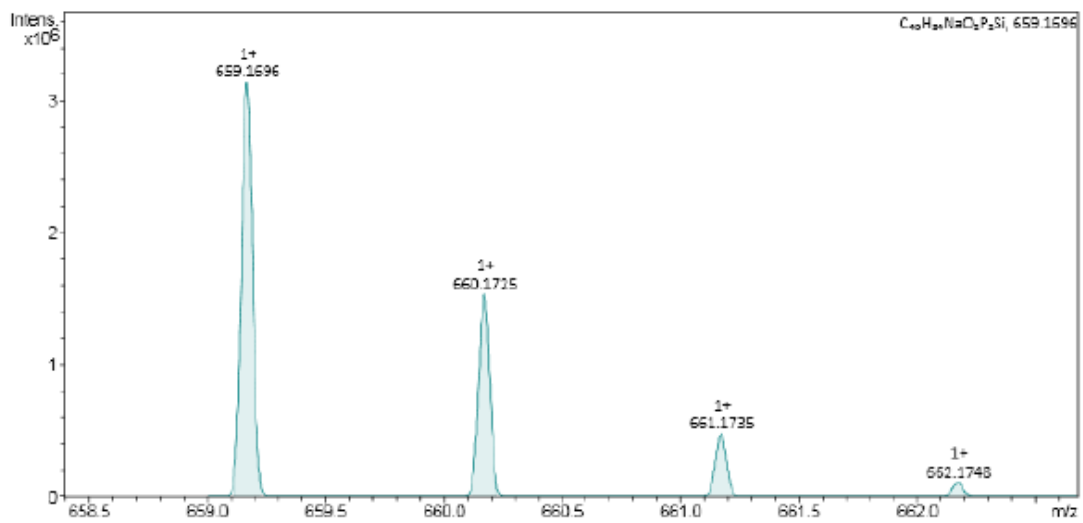

**(S)-(2,2',3,3'-tetrahydro-1,1'-spiro[benzo[*b*]silole]-7,7'-diyl)bis(dbis(4-methylphenyl)phosphine oxide) ((S)-S3-2)**

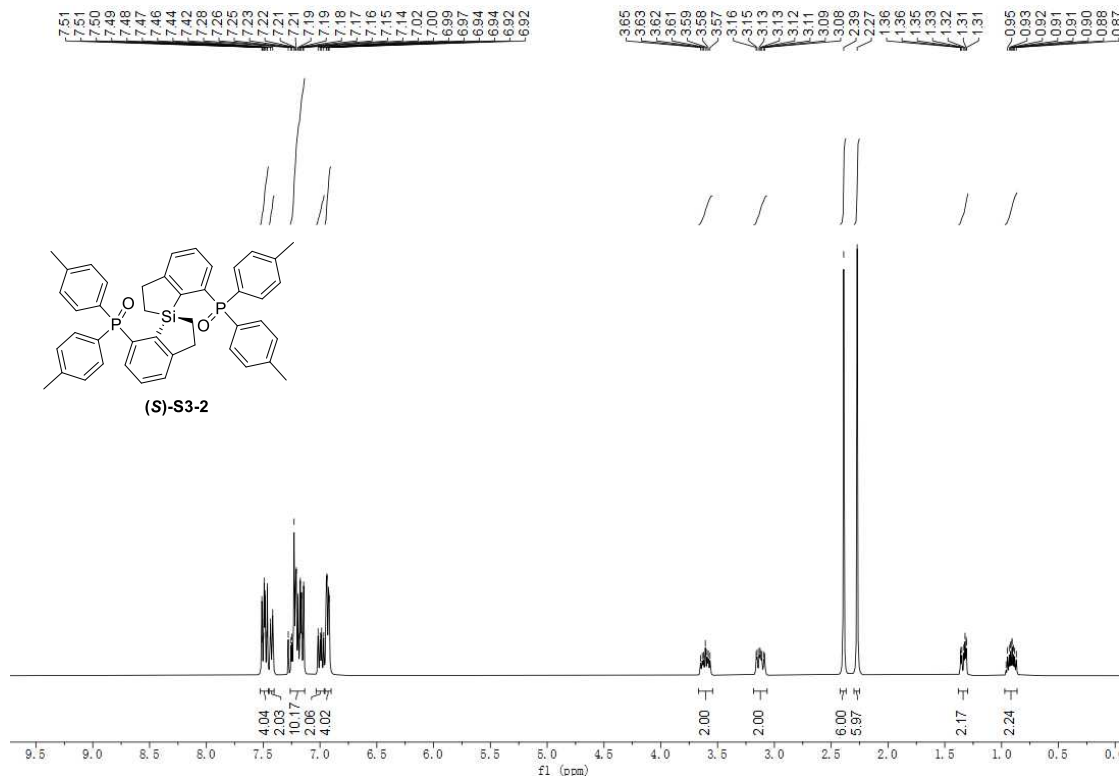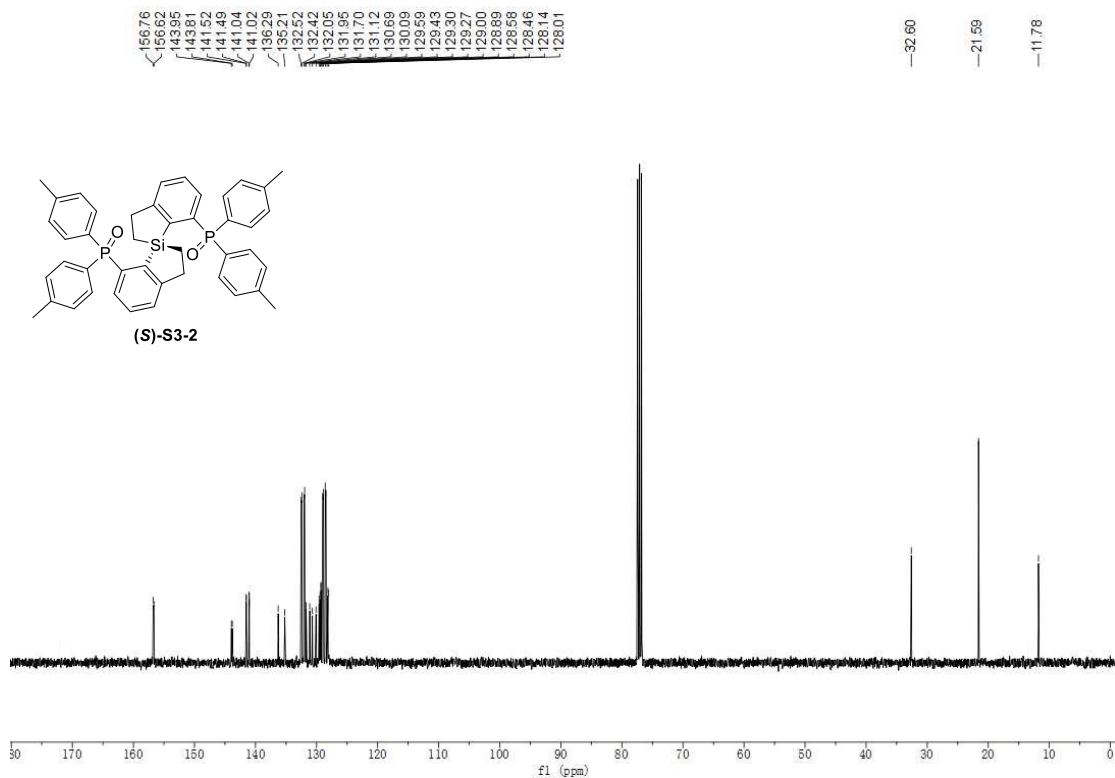

-30.11

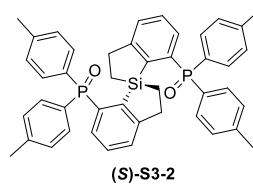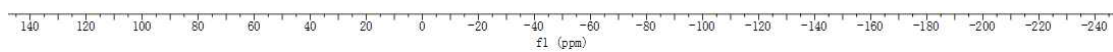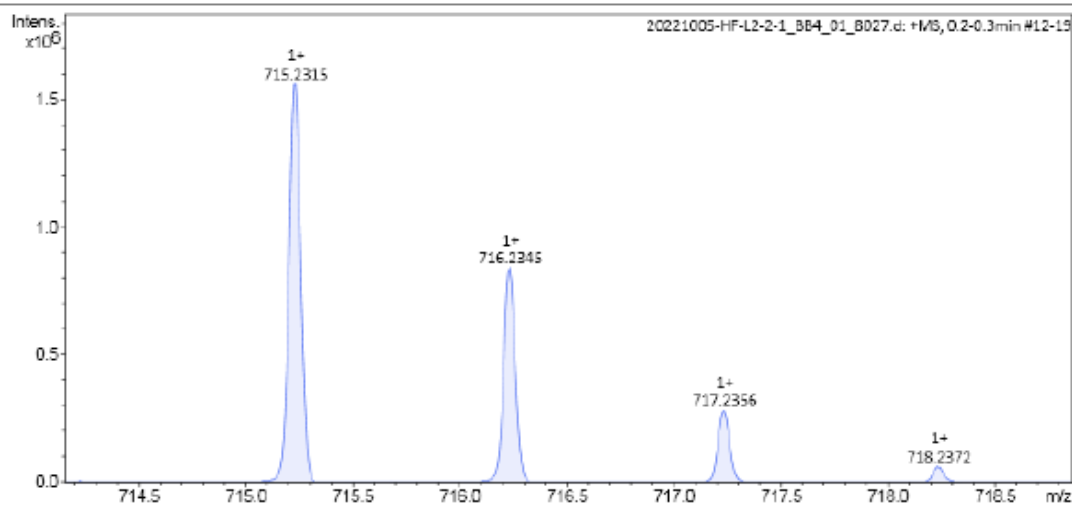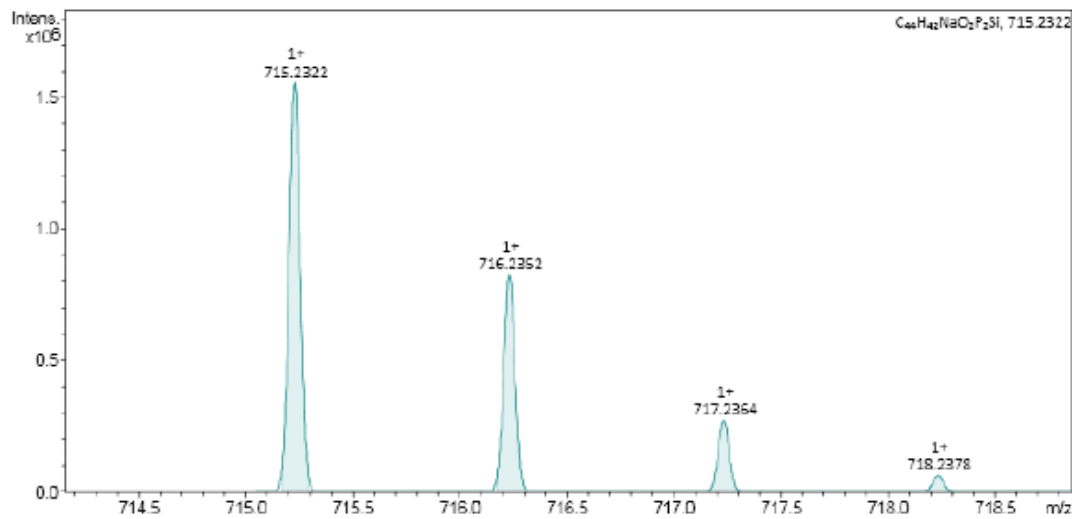

**(S)-(2,2',3,3'-tetrahydro-1,1'-spiro[benzo[*b*]silole]-7,7'-diyl)bis(dbis(4-methoxyphenyl)phosphine oxide) ((S)-S3-3)**

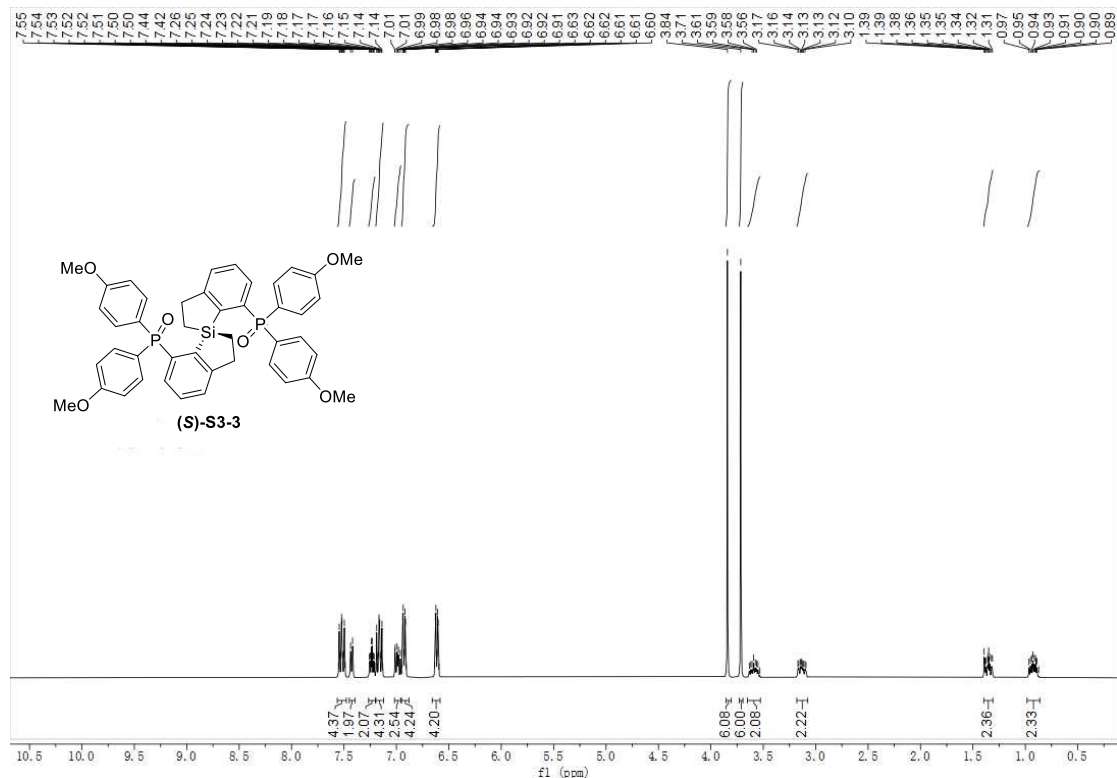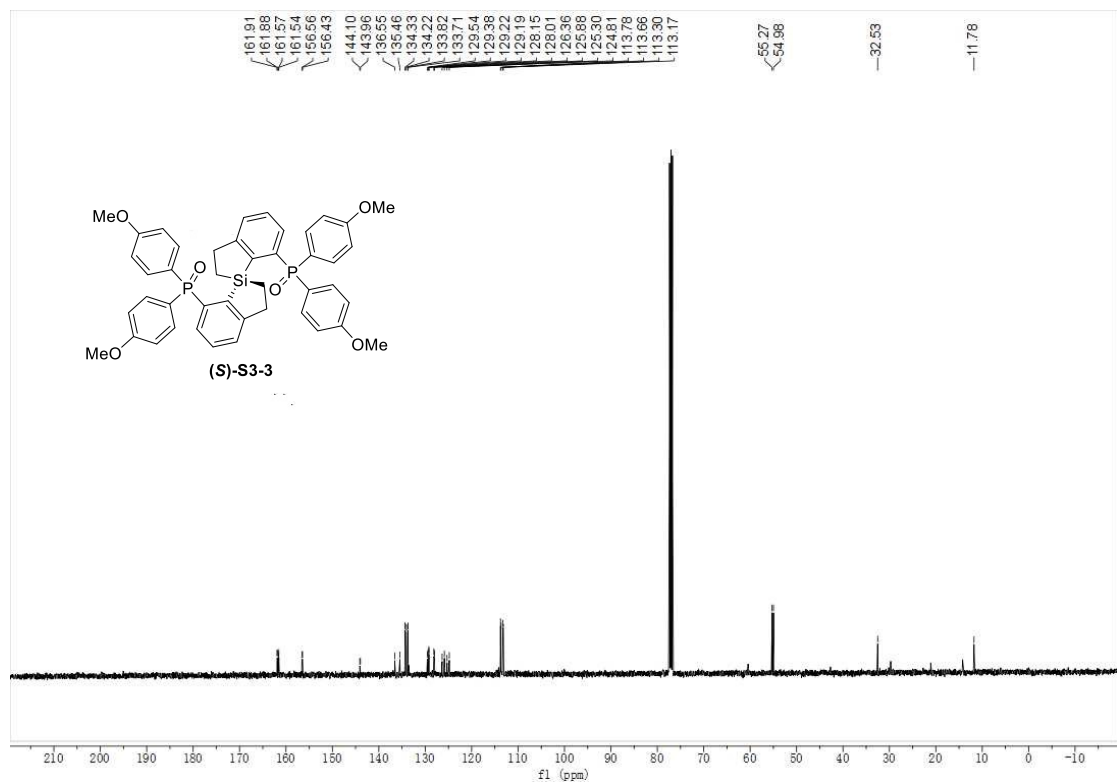

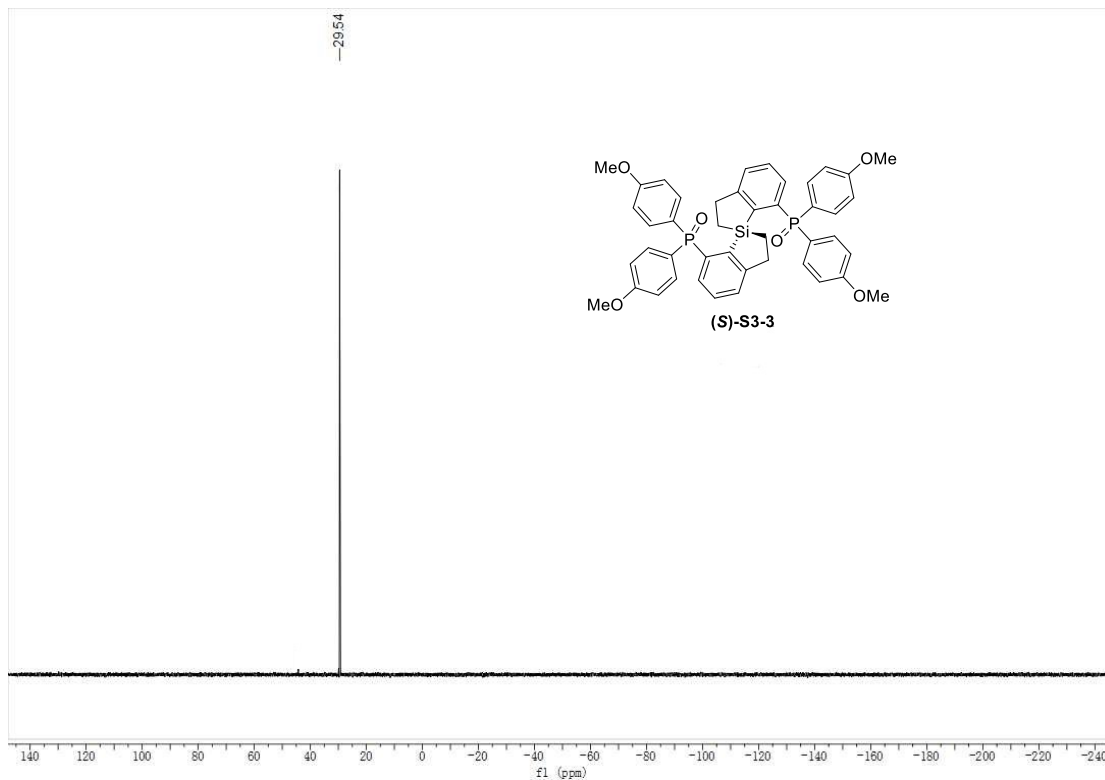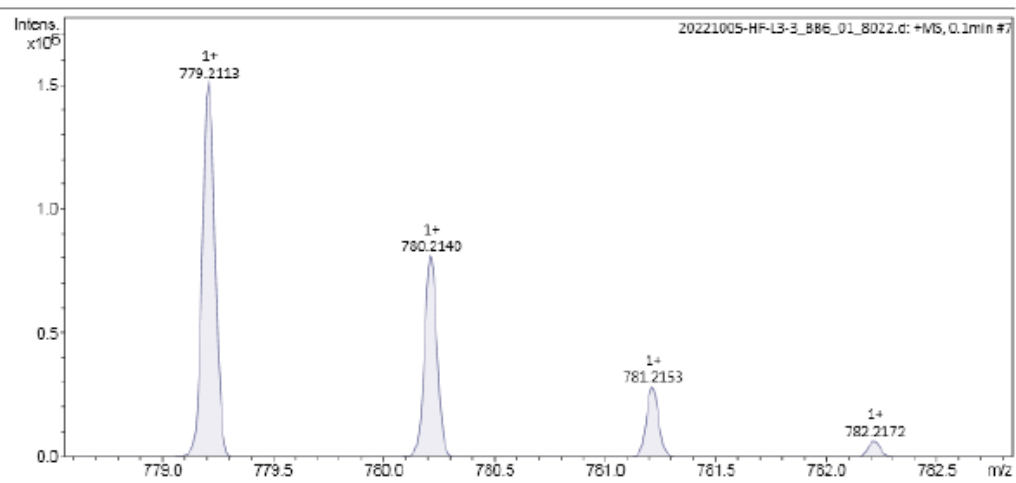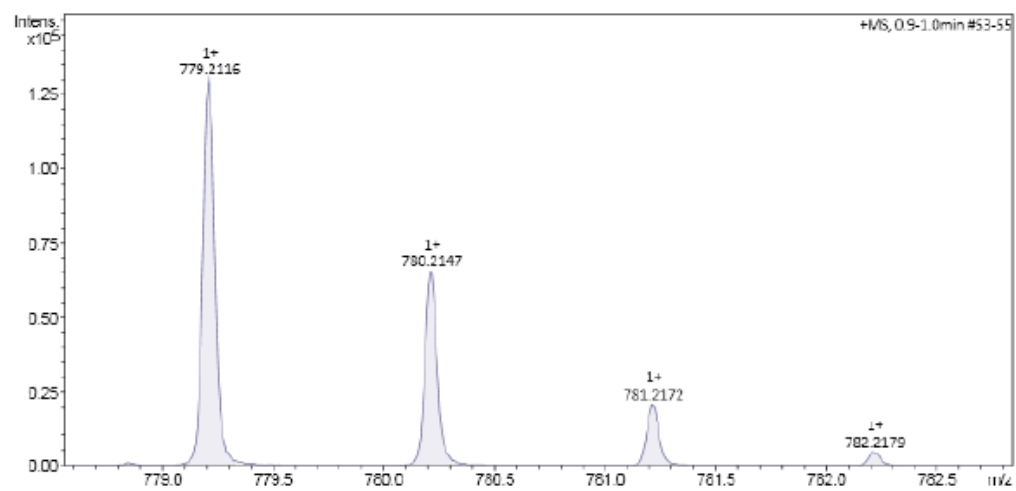

**(S)-(2,2',3,3'-tetrahydro-1,1'-spiro[benzo[*b*]silole]-7,7'-diyl)bis(dbis(3,5-dimethylphenyl)phosphine oxide) ((S)-S3-4)**

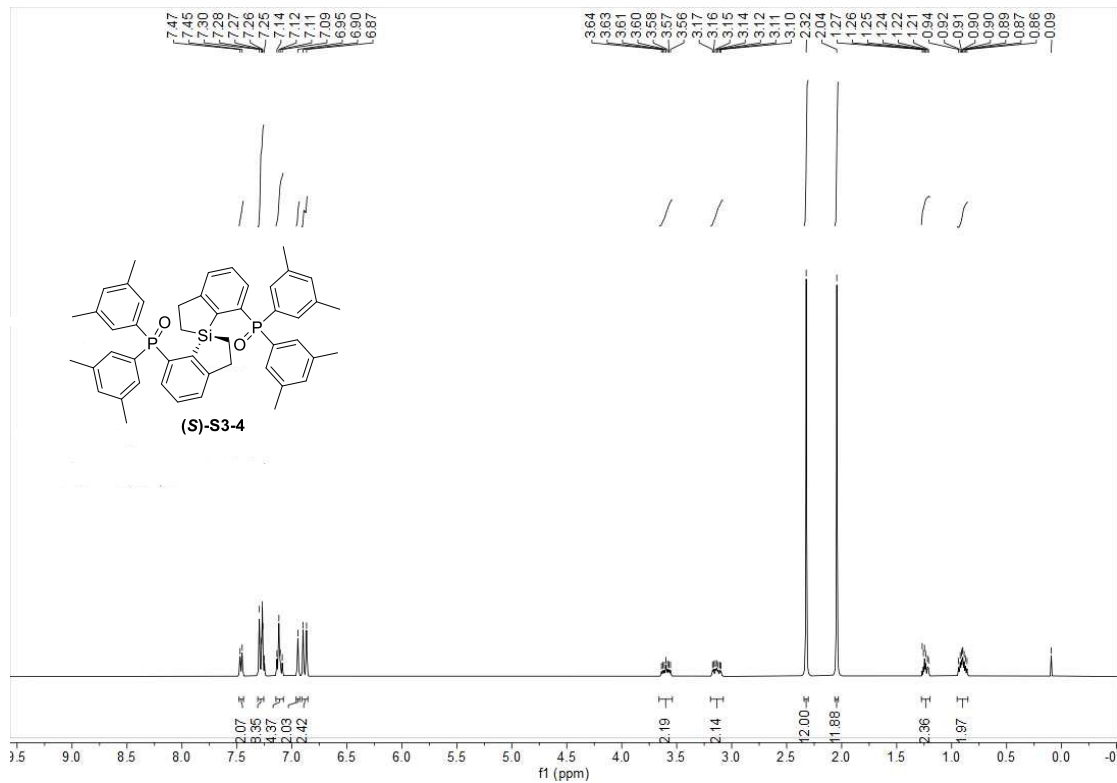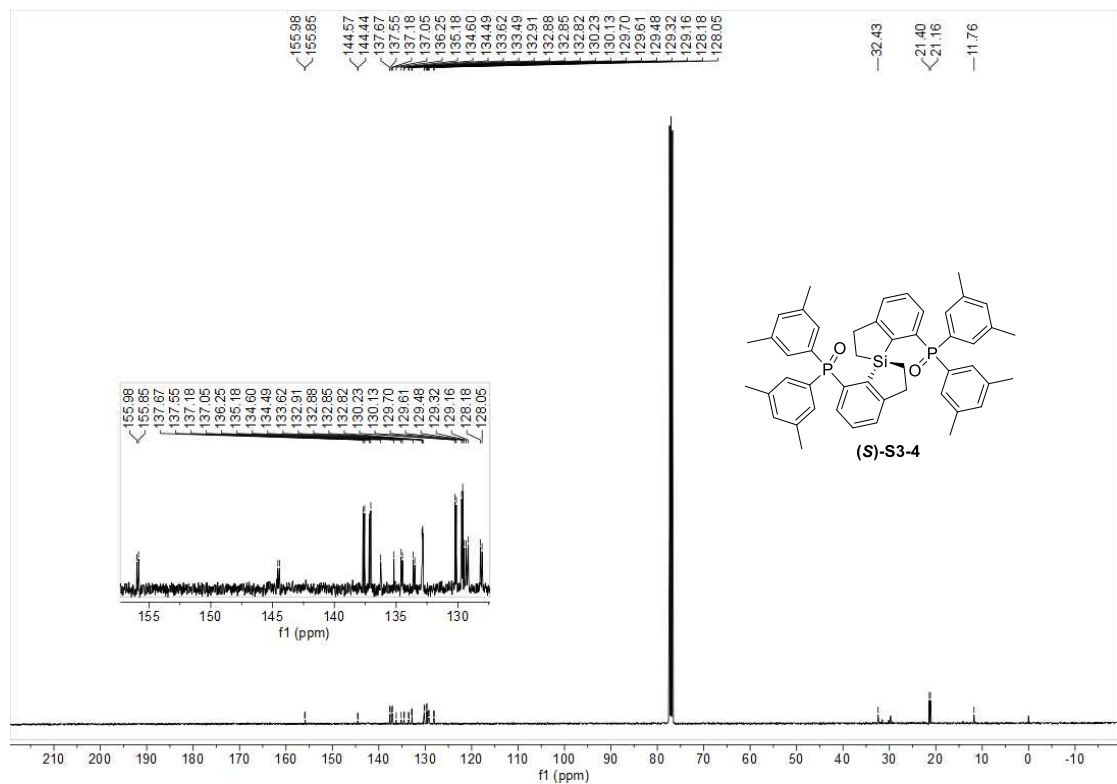

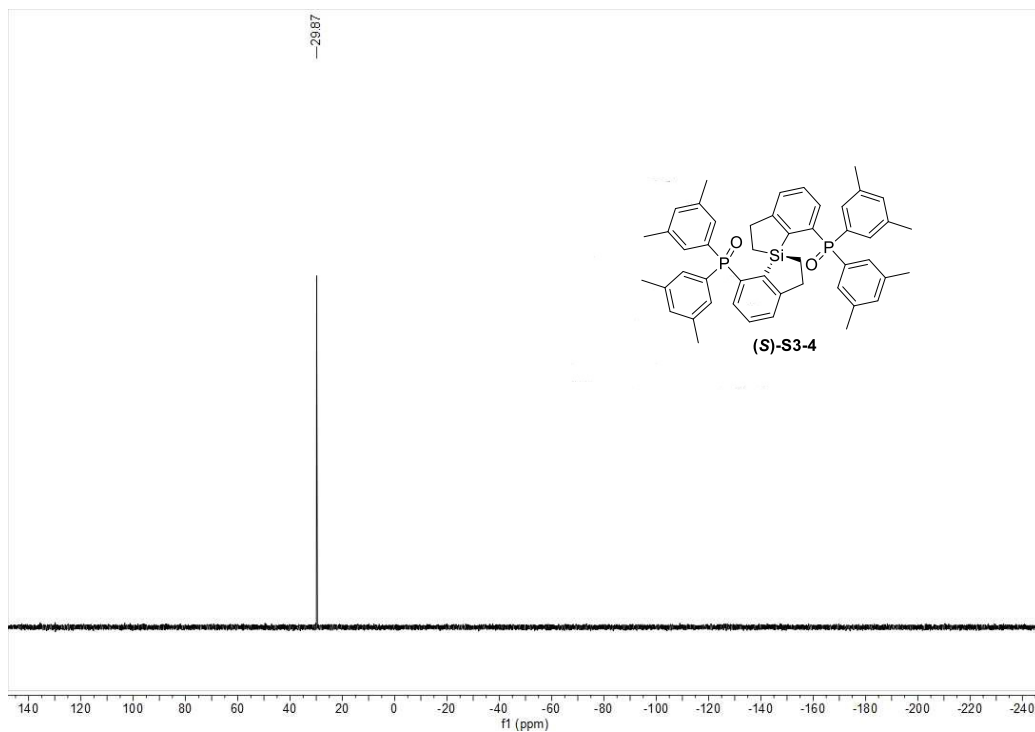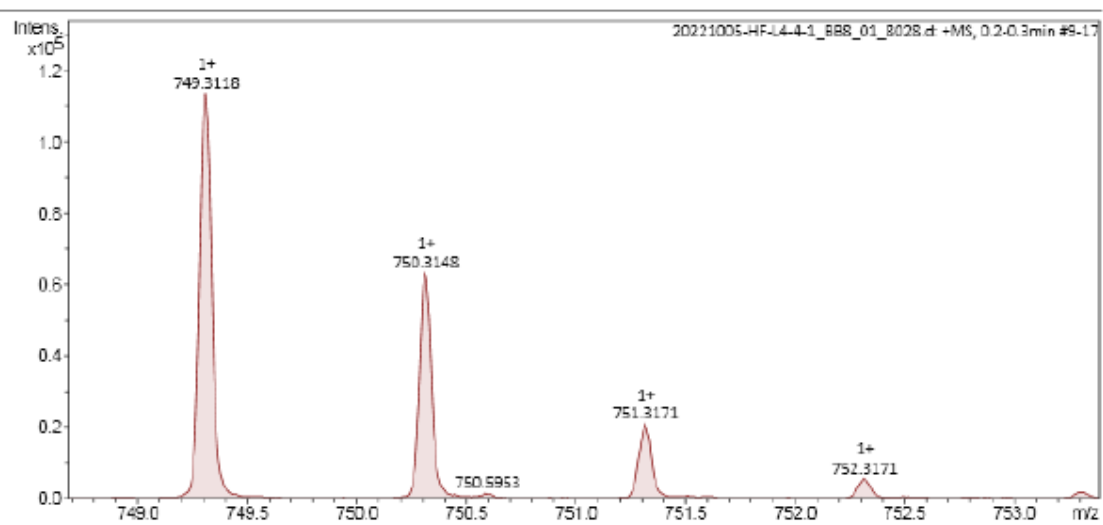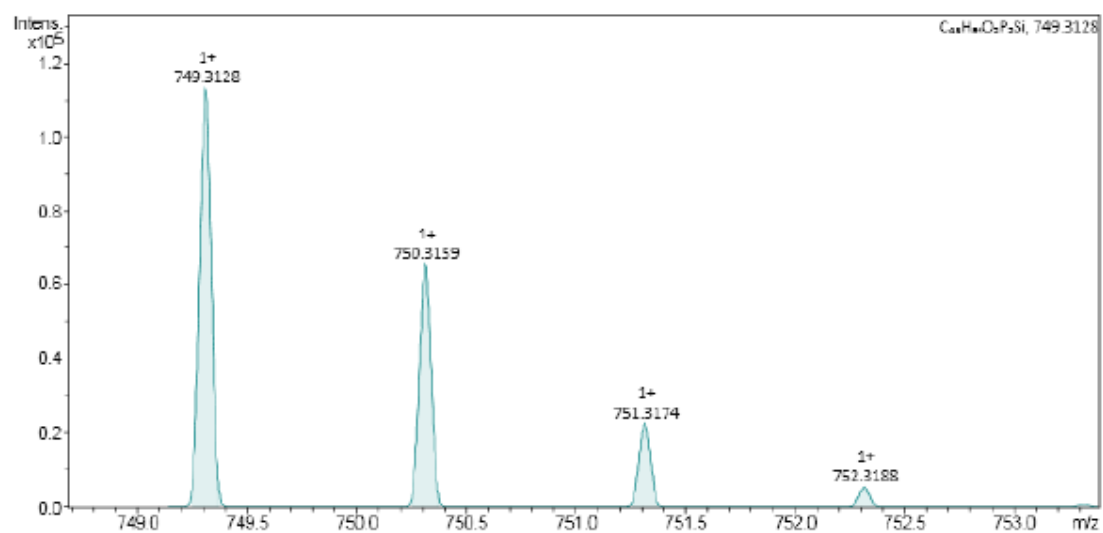

**(S)-7,7'-bis(diphenylphosphaneyl)-2,2',3,3'-tetrahydro-1,1'-spirobi[benzo**b**]silole (L-3)**

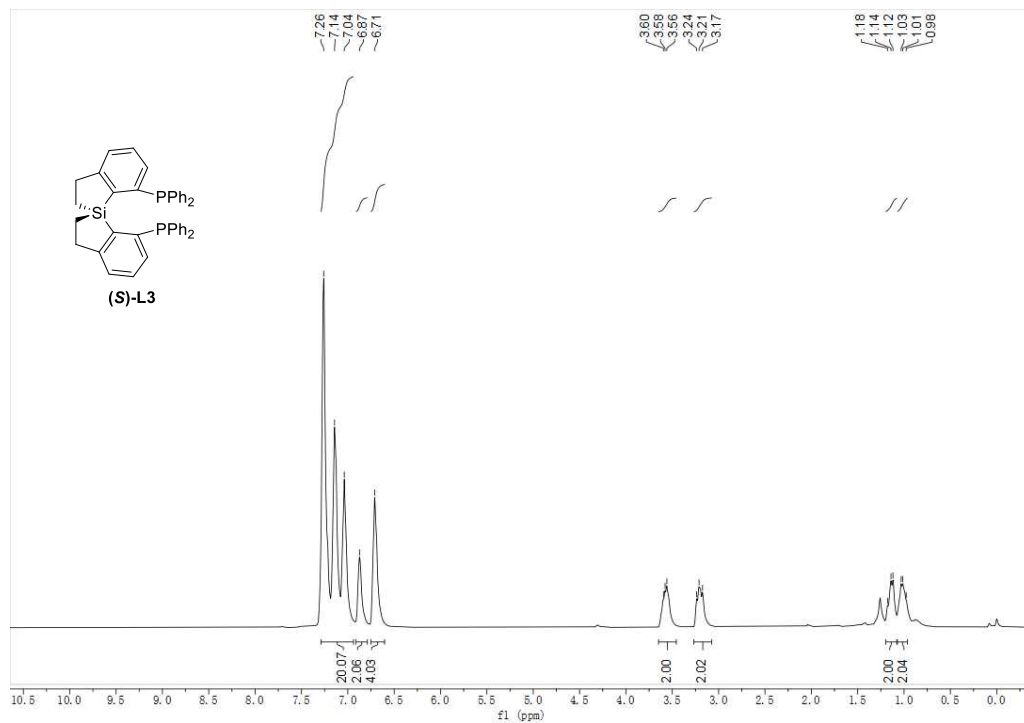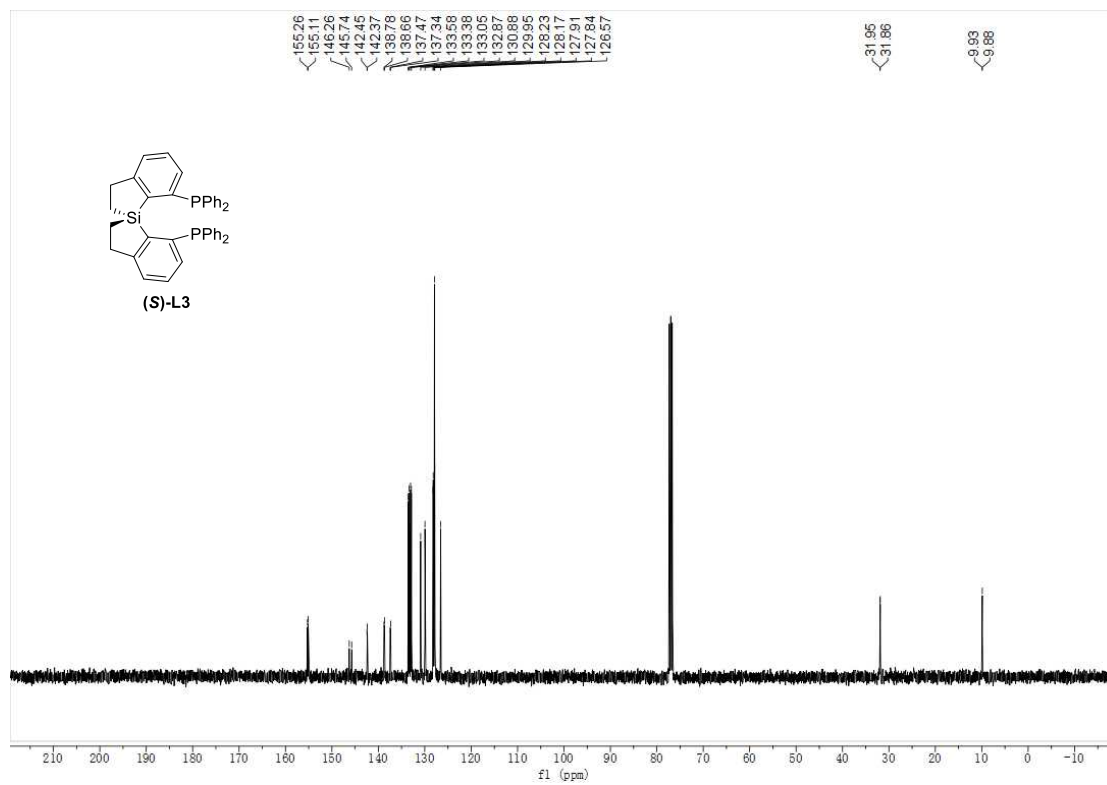



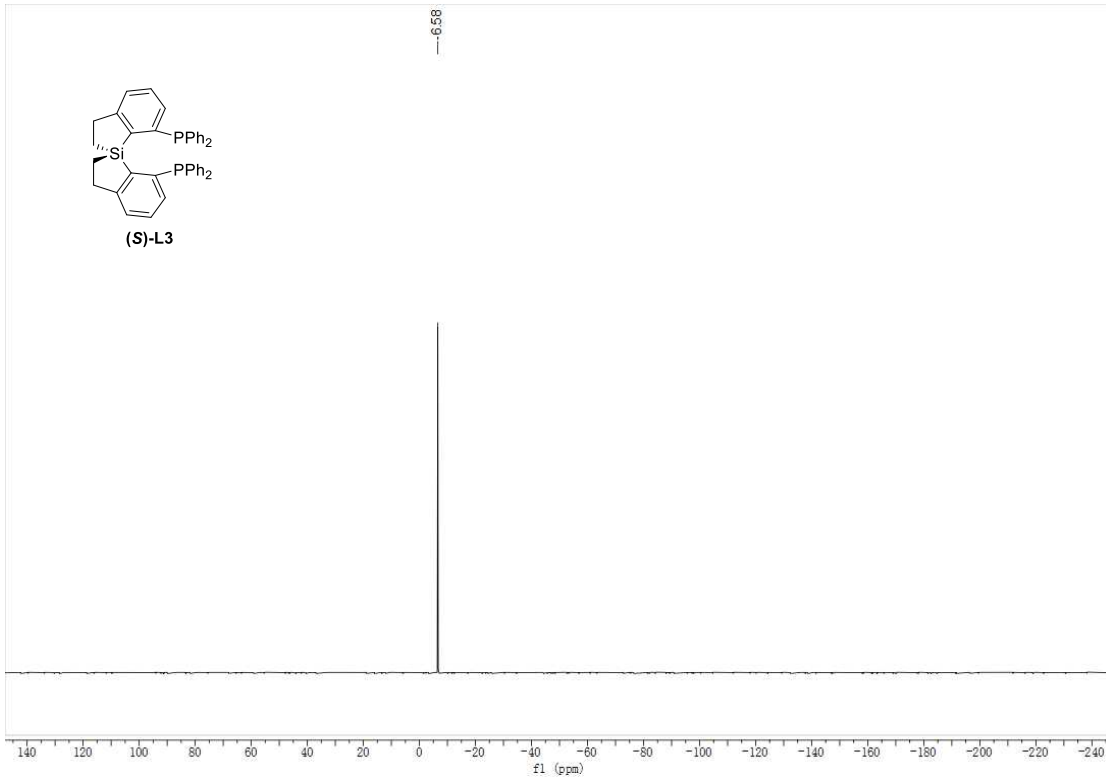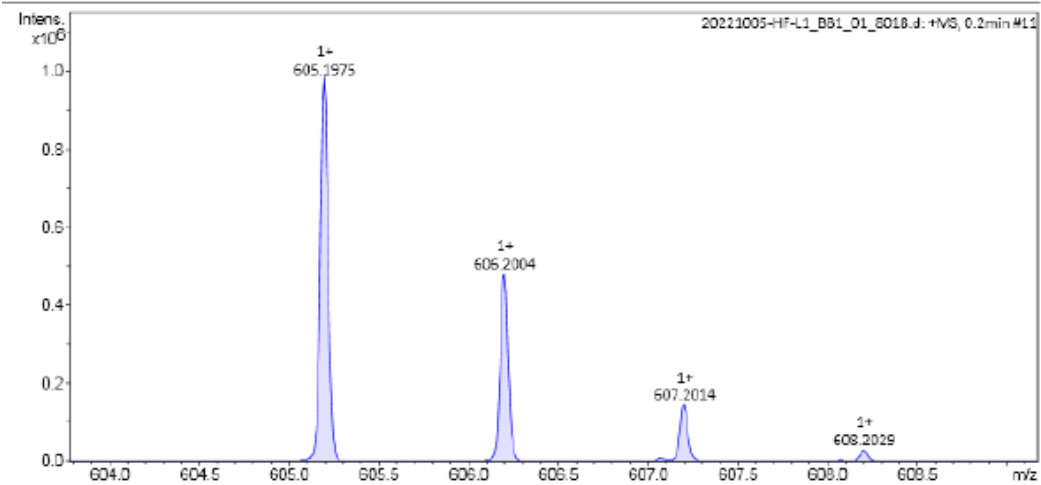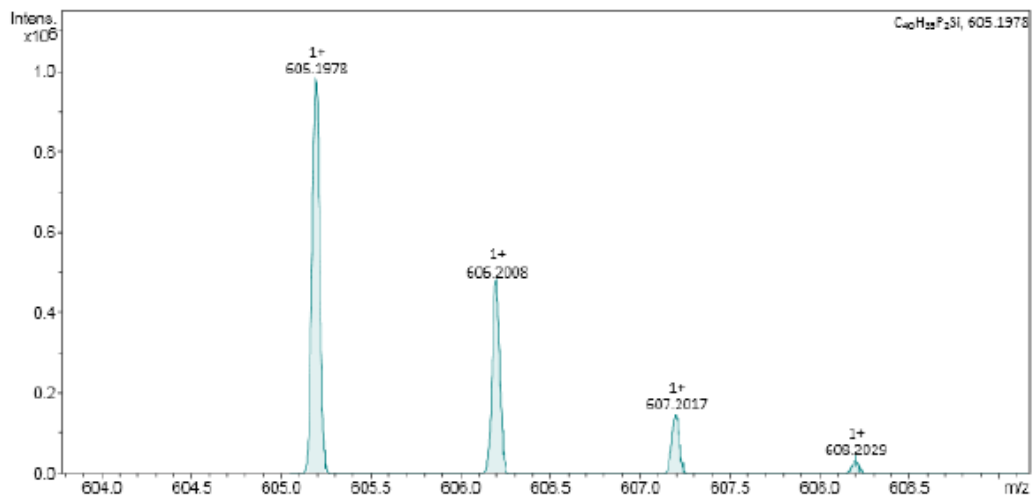

**(S)-7,7'-bis(4-CH<sub>3</sub>-(diphenylphosphaneyl))-2,2',3,3'-tetrahydro-1,1'-spirobi[benzo[*b*]silole]  
(L-4)**

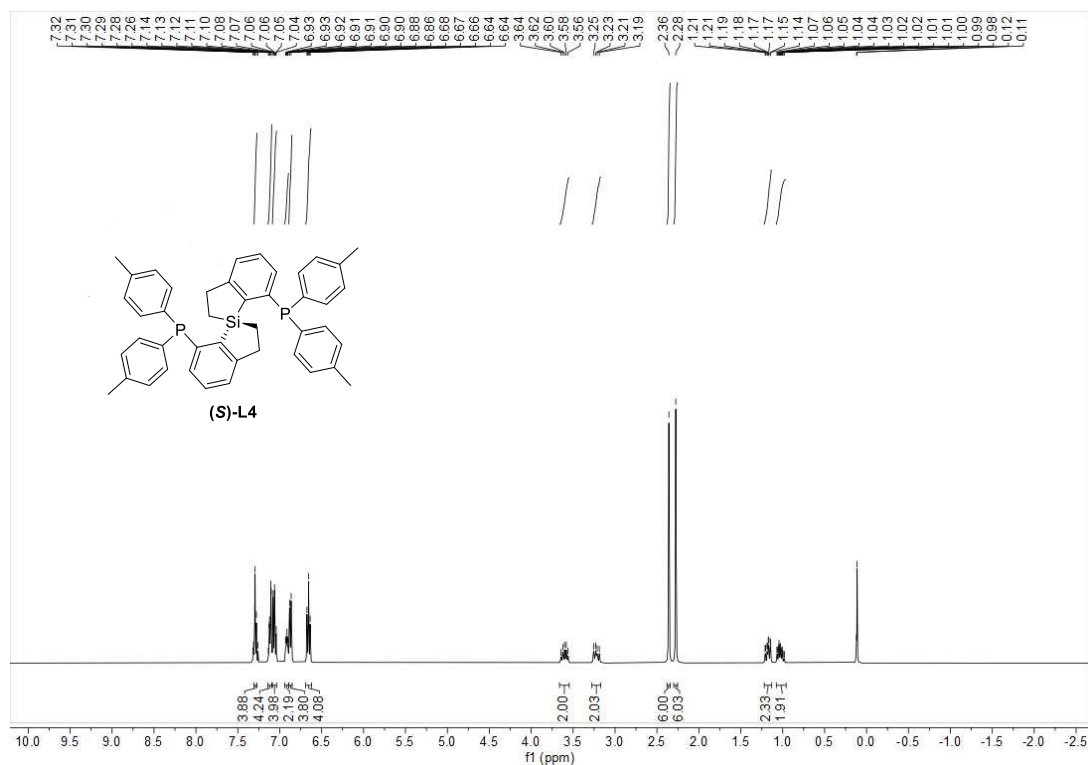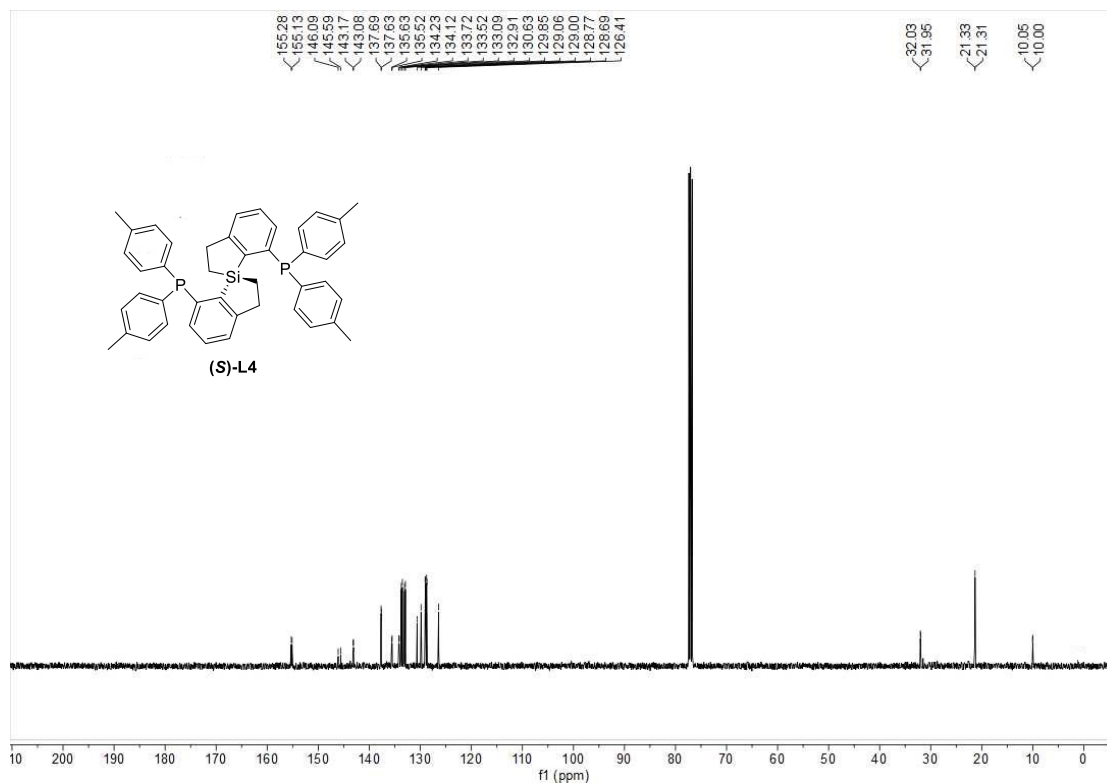

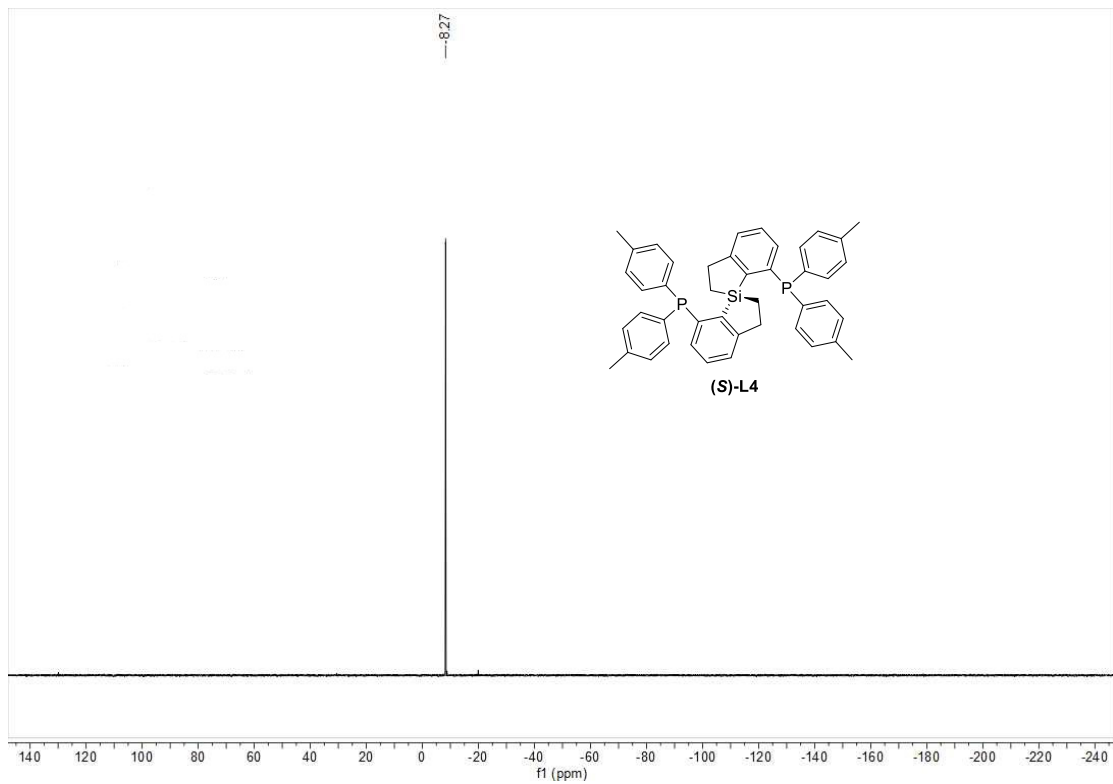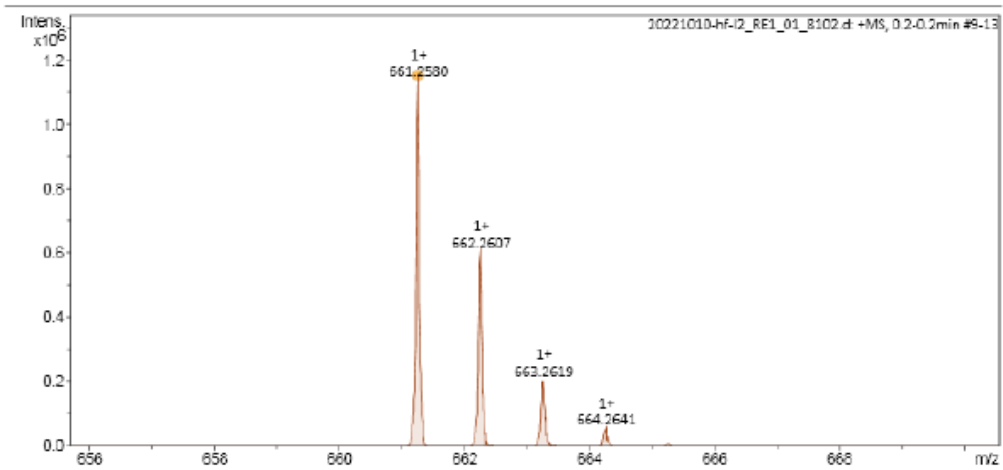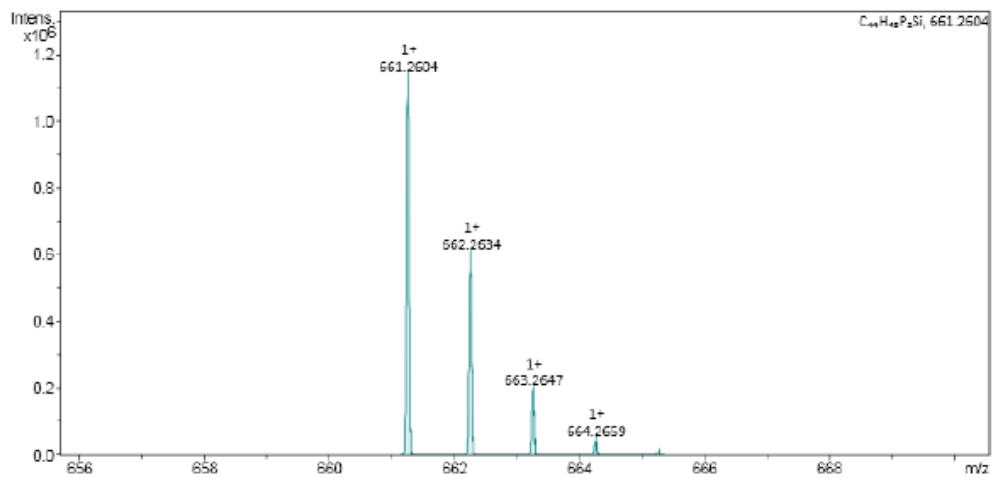

**(S)-7,7'-bis(4-OCH<sub>3</sub>-(diphenylphosphanyl))-2,2',3,3'-tetrahydro-1,1'-spirobi[benzo[*b*]silole] (L-5)**

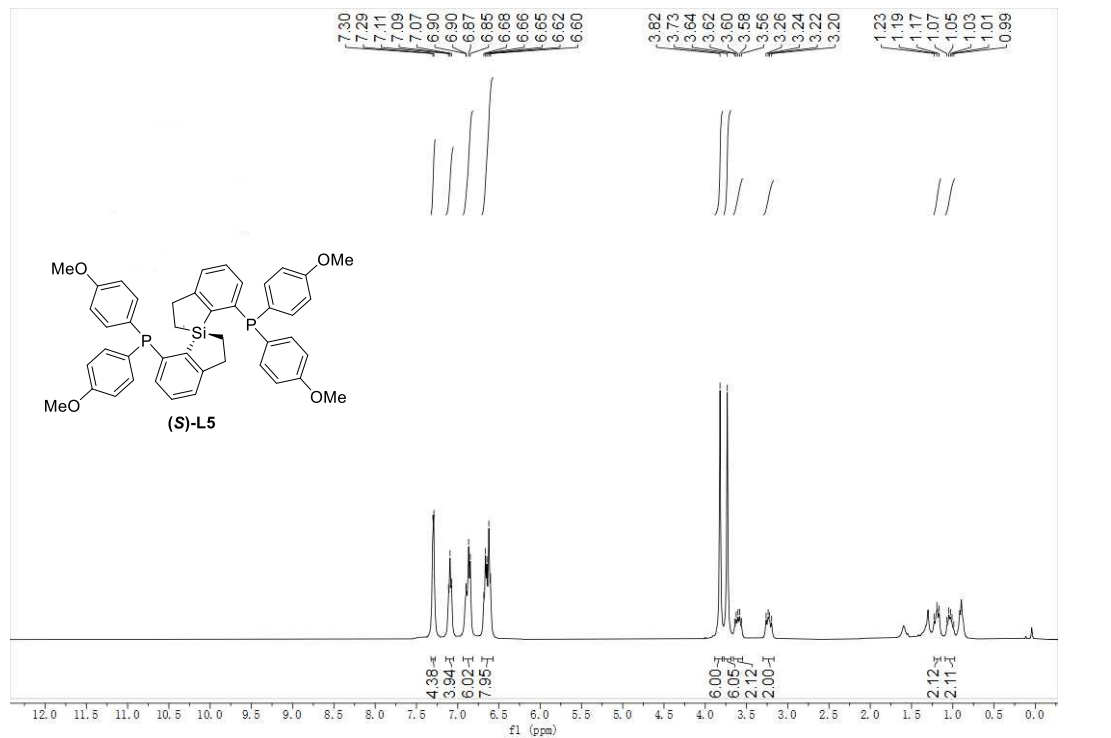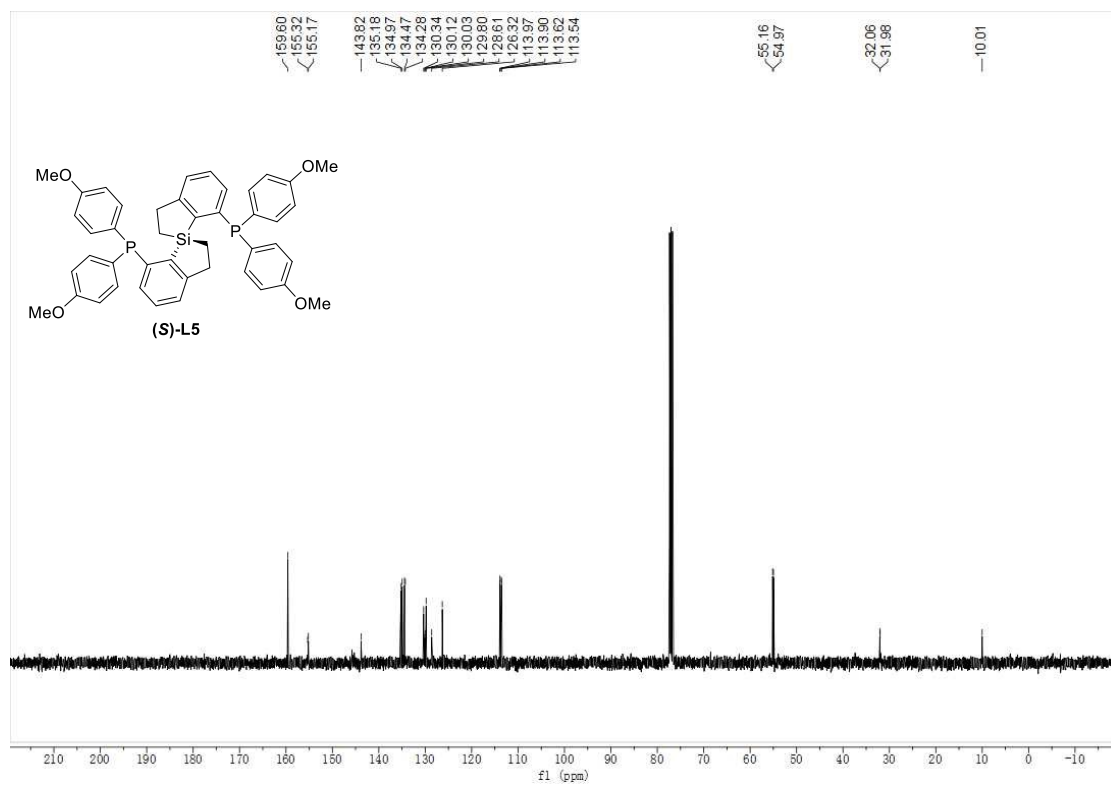

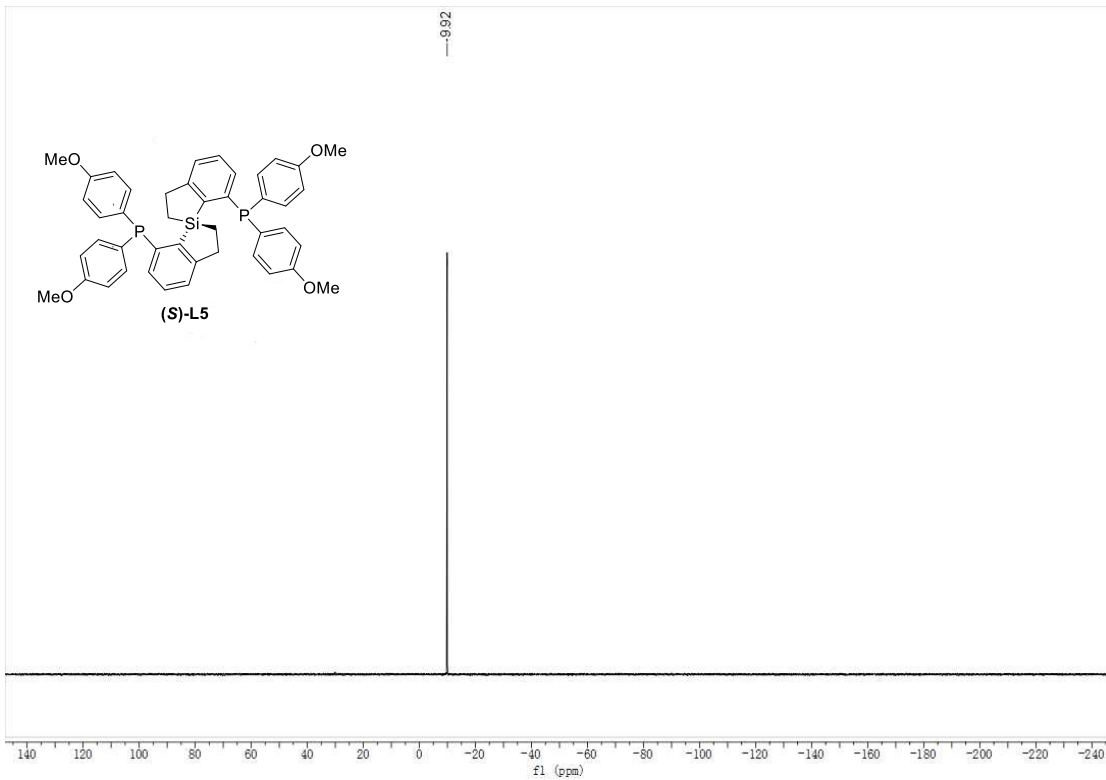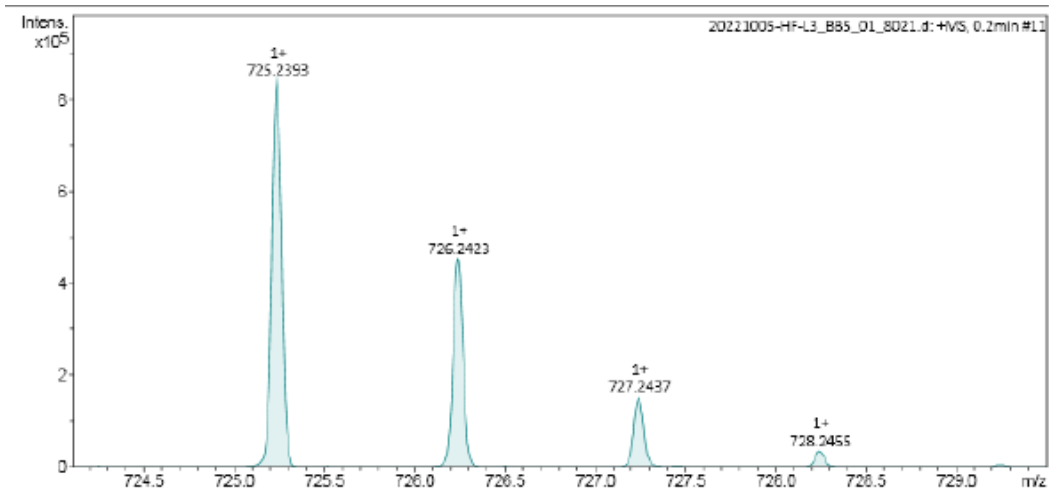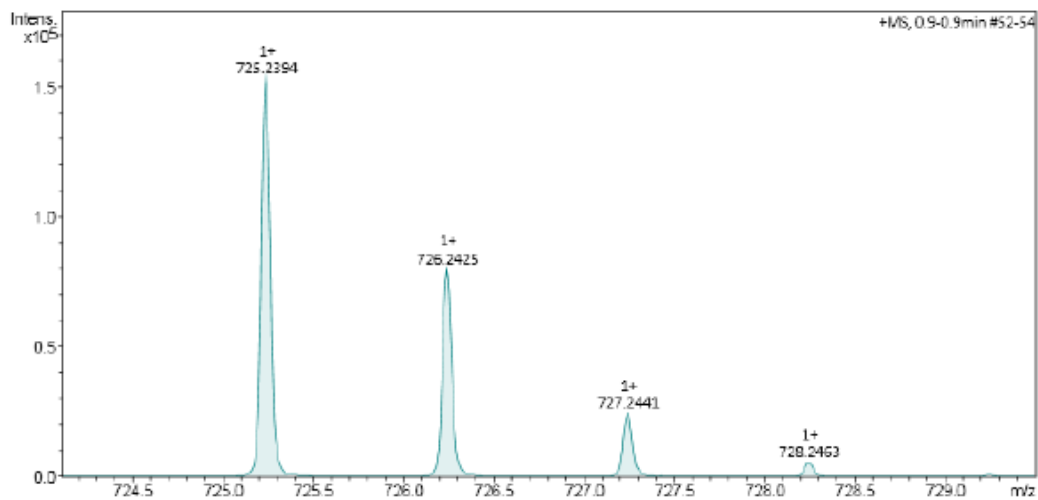

**(S)-7,7'-bis(3,5-(CH<sub>3</sub>)<sub>2</sub>-(diphenylphosphaneyl))-2,2',3,3'-tetrahydro-1,1'-spirobi[benzo**b**]silole (L-6)**

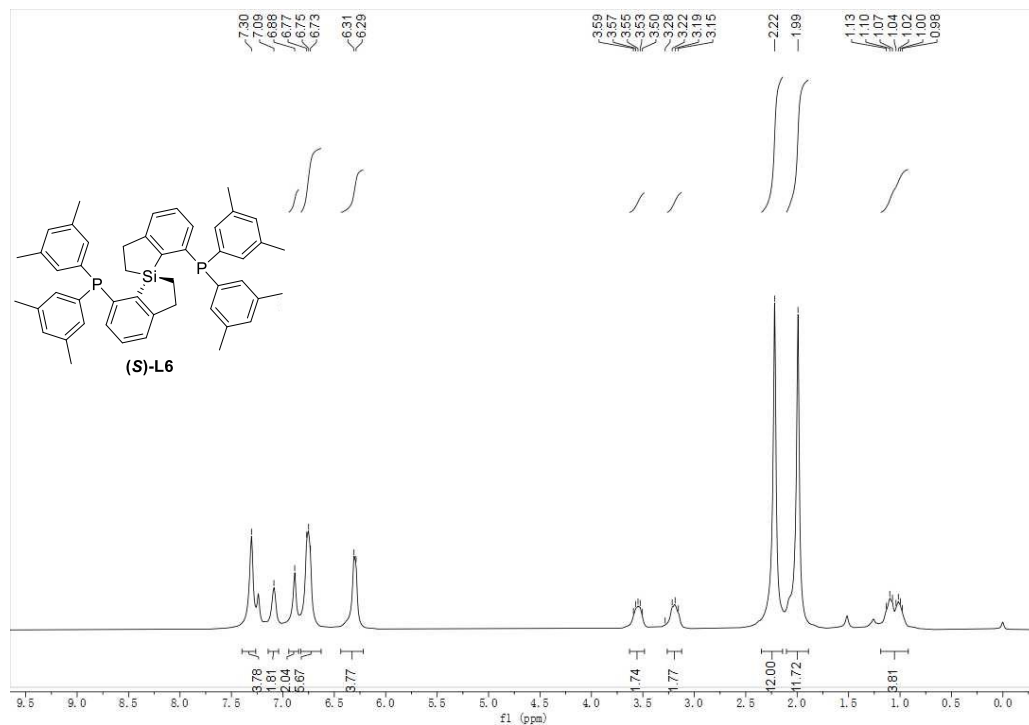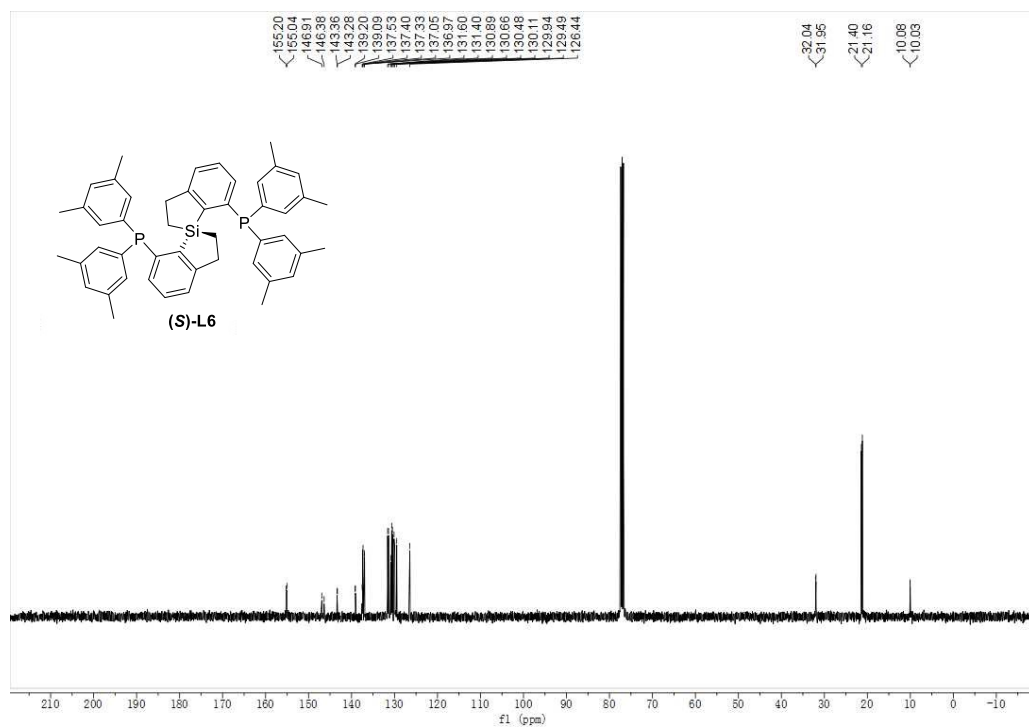

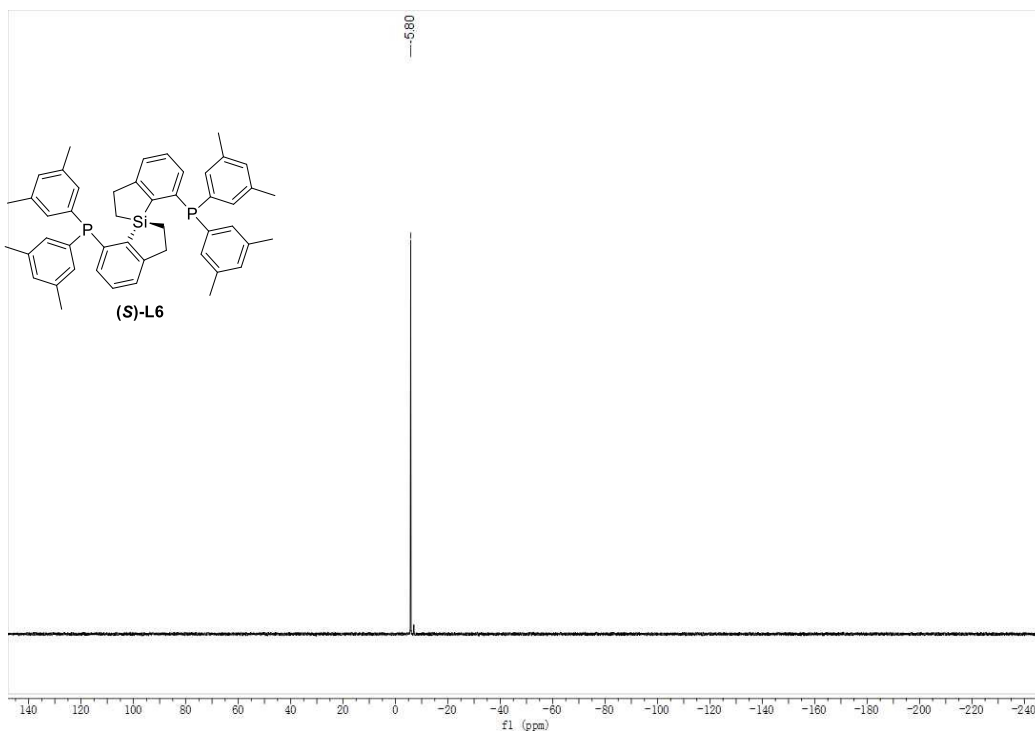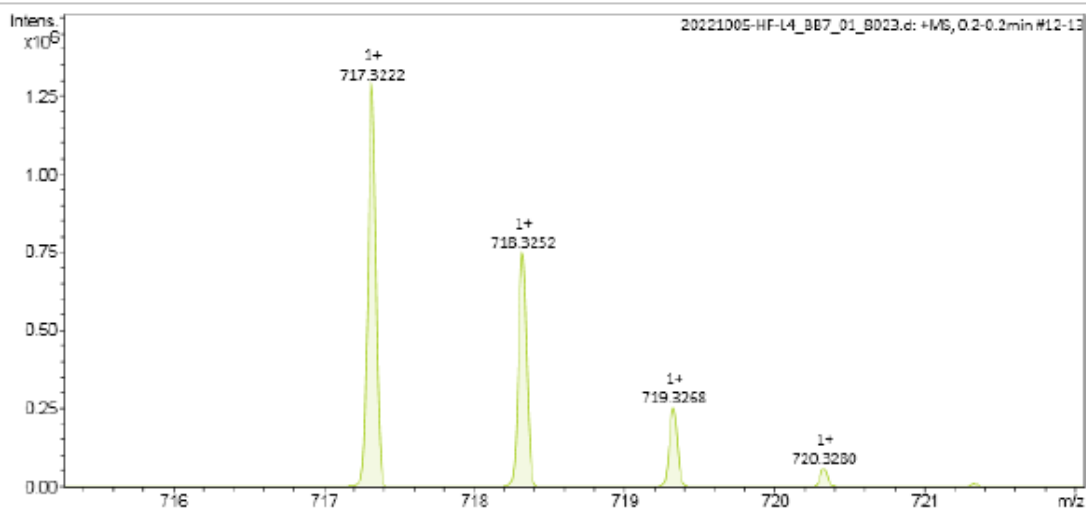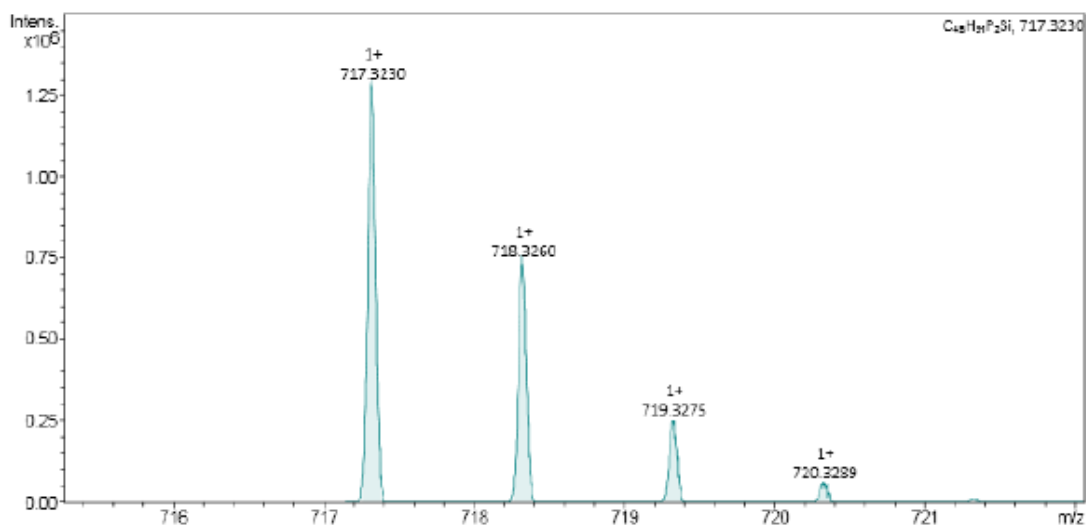

{PdCl<sub>2</sub>[(S)-L3]}(S15)

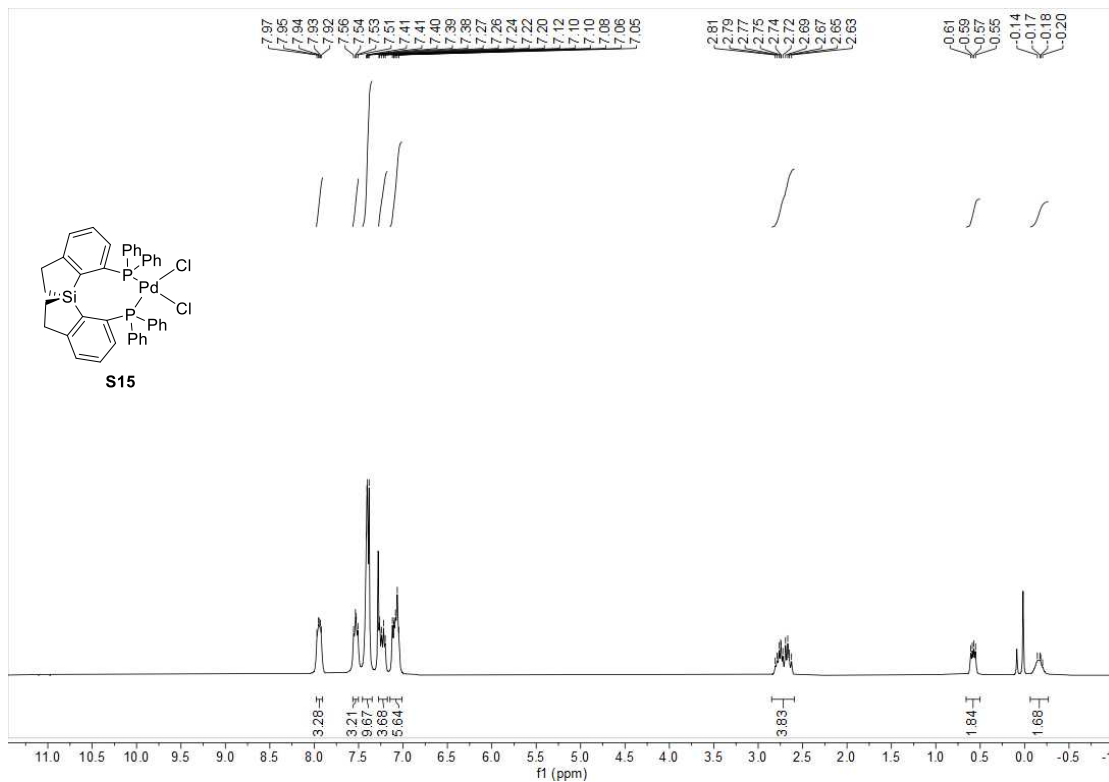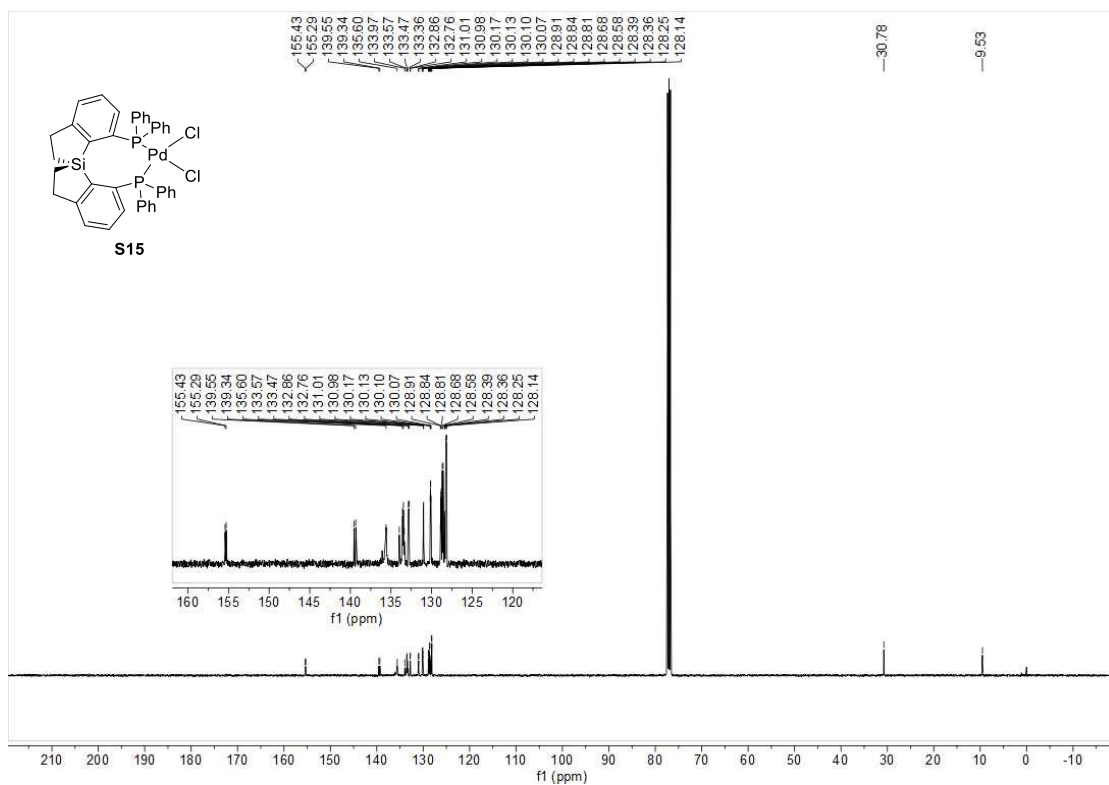



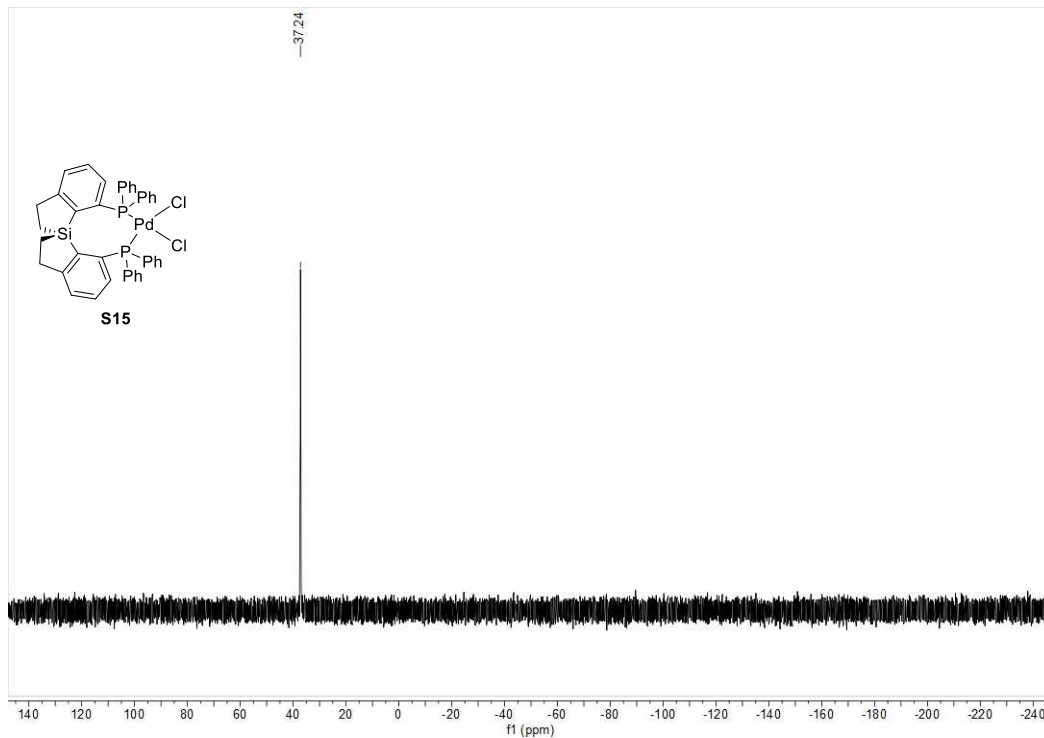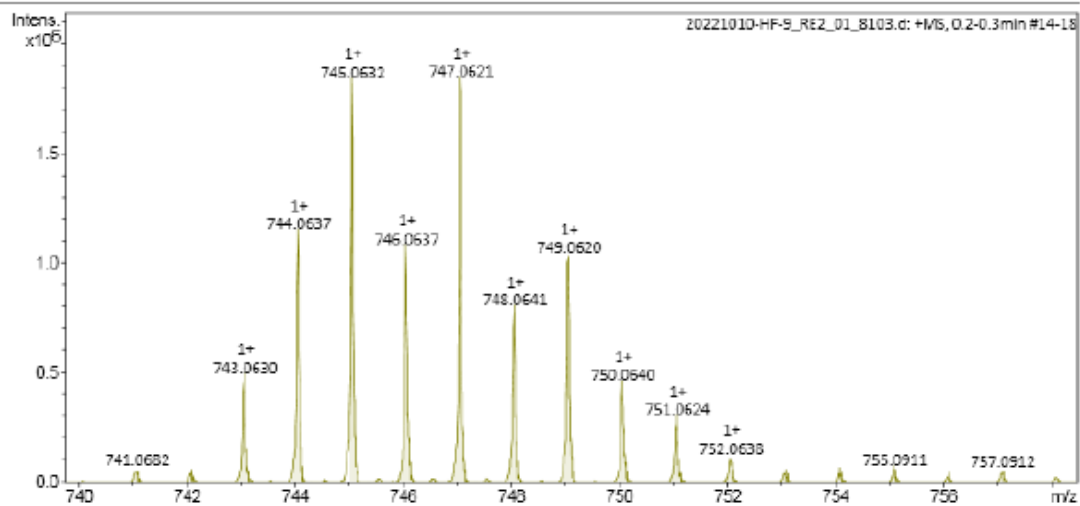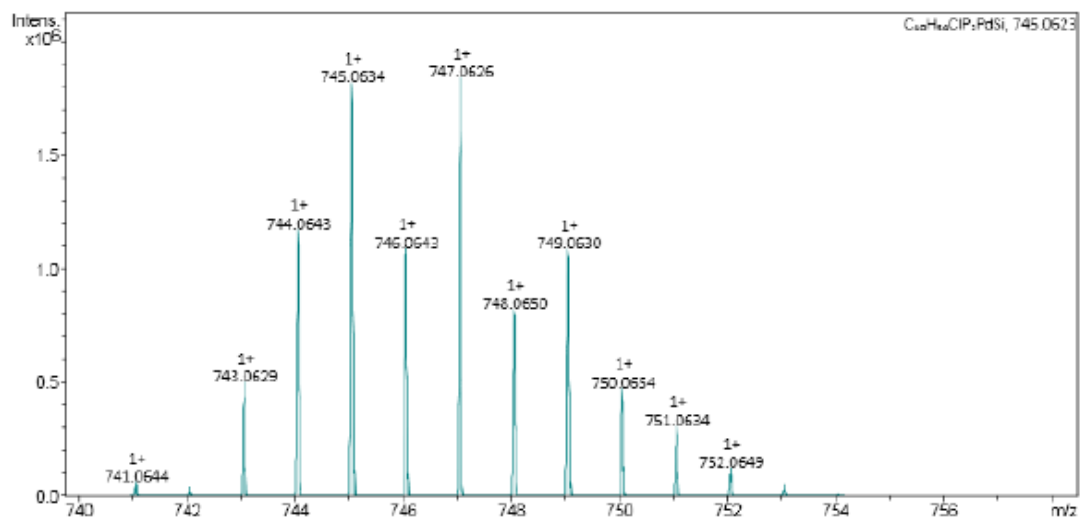

***N*,4-dimethyl-*N*-(prop-2-yn-1-yl)benzenesulfonamide (5)**

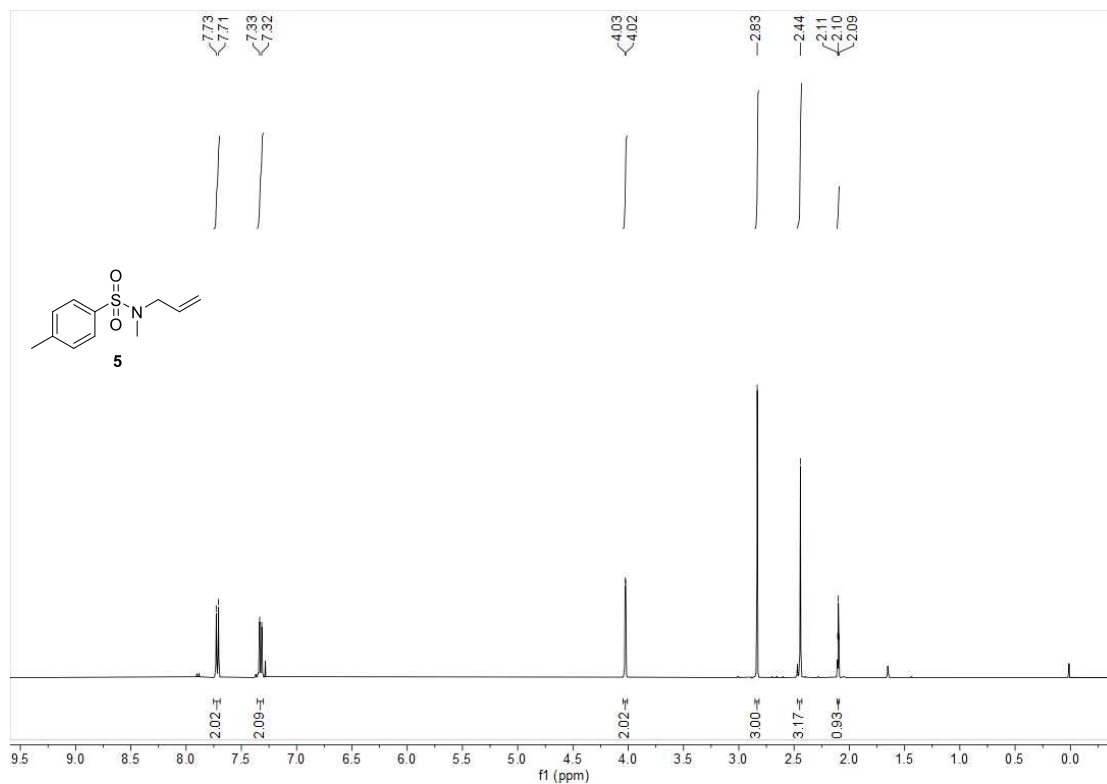

***N*-allyl-*N*,4-dimethylbenzenesulfonamide (7)**

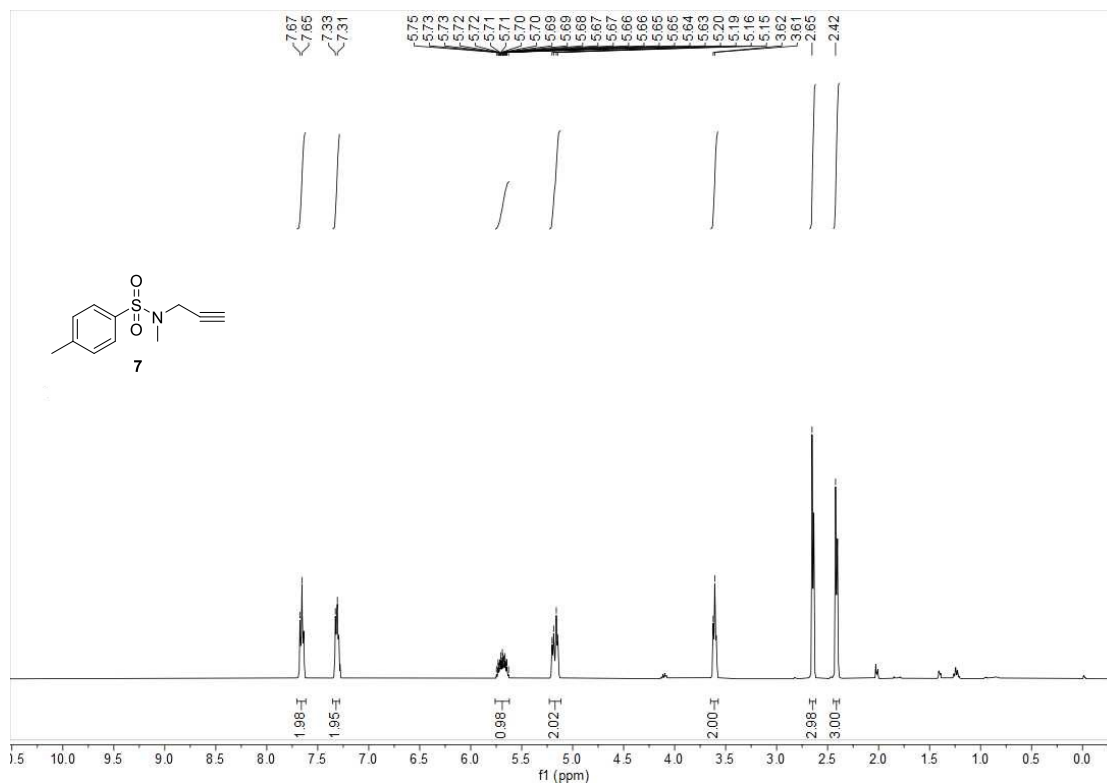

**(E)-1-tosyl-3-((triethylsilyl)methylene)pyrrolidine-4-d (3a-d-2)**

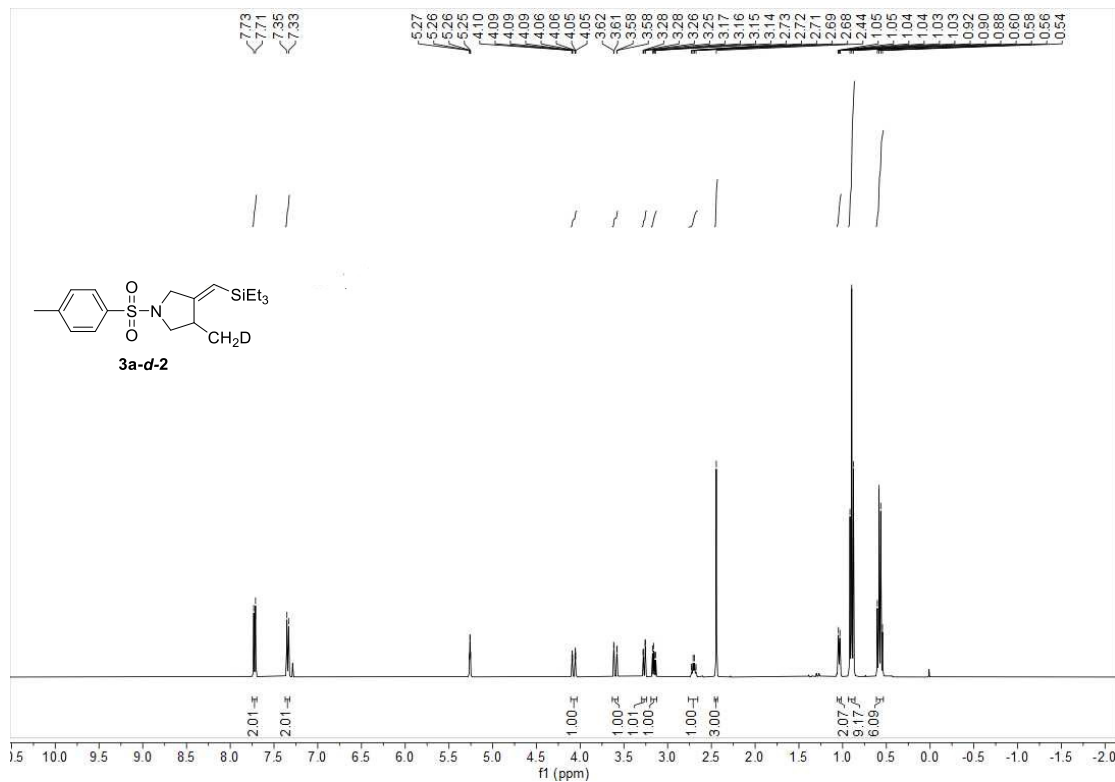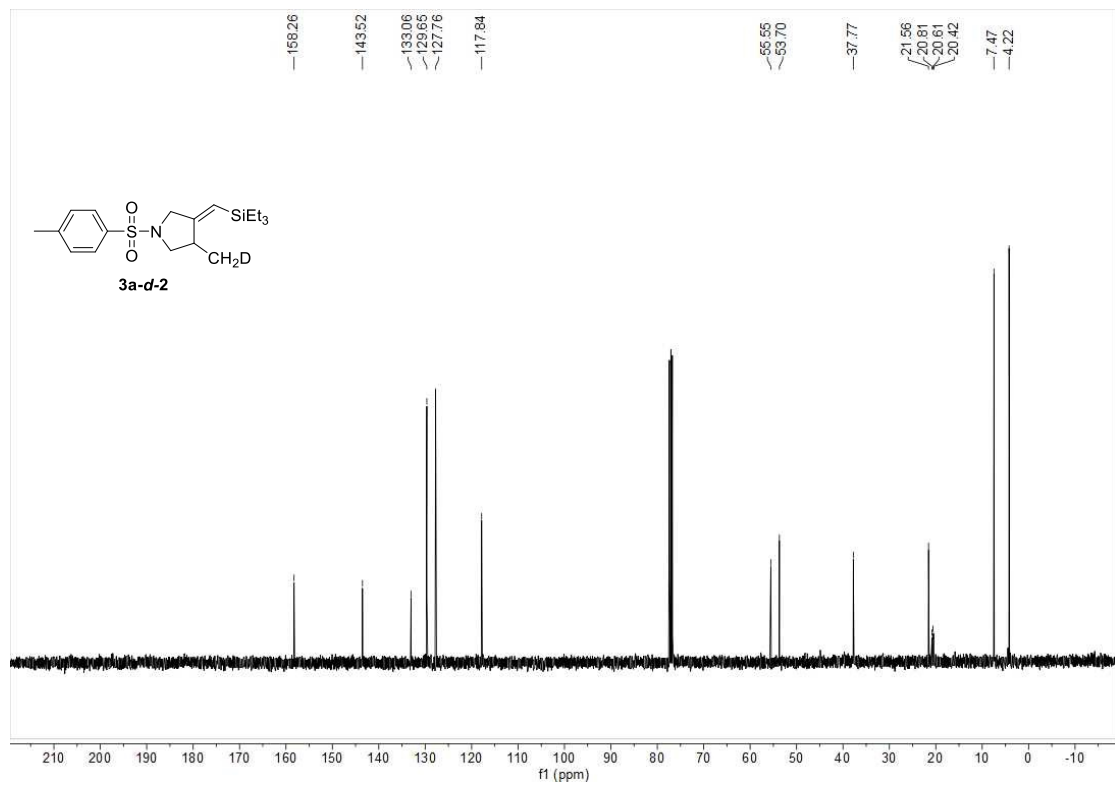

**(E)-1-tosyl-3-((triethylsilyl)methylene)pyrrolidine-4-d (3a-d-3)**

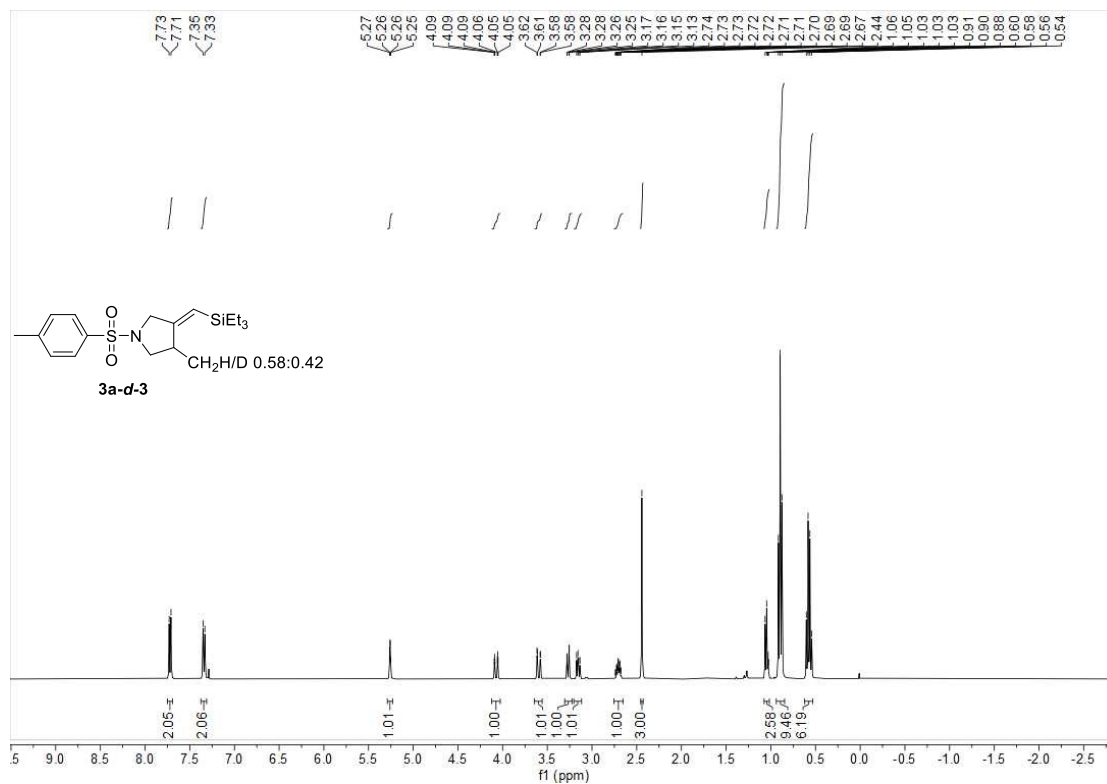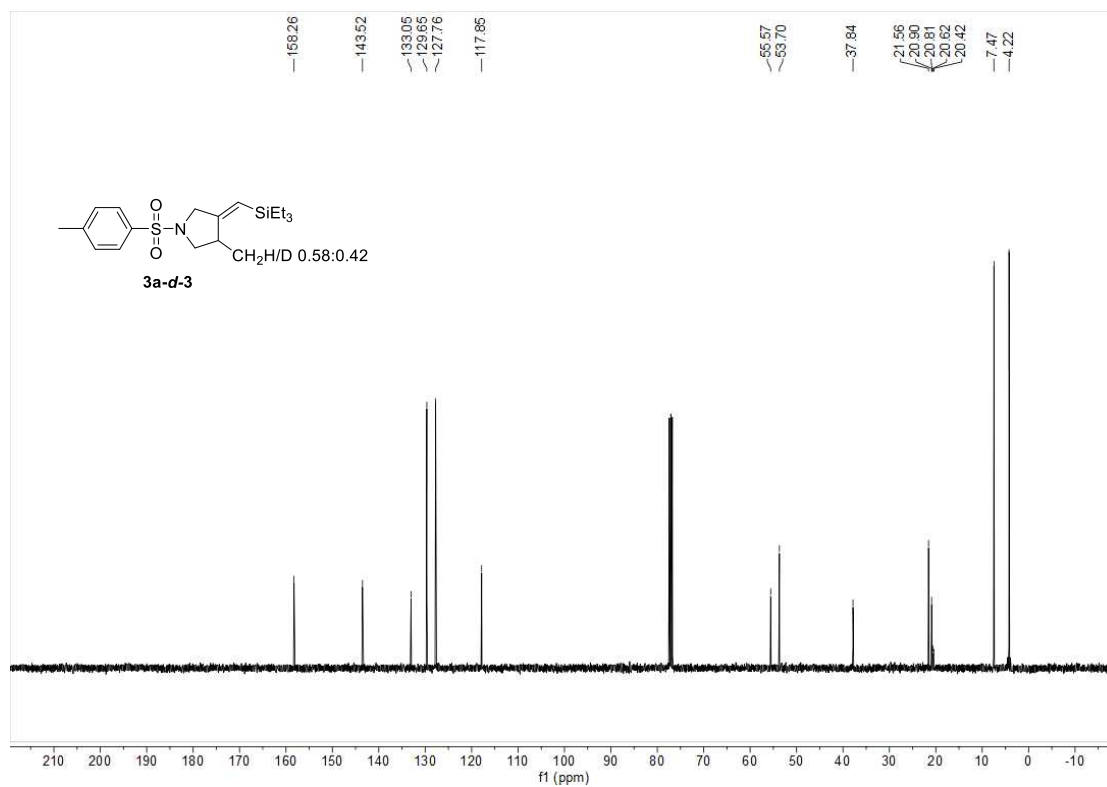

***N*-allyl-4-chloro-*N*-(prop-2-yn-1-yl)benzenesulfonamide (1c)**

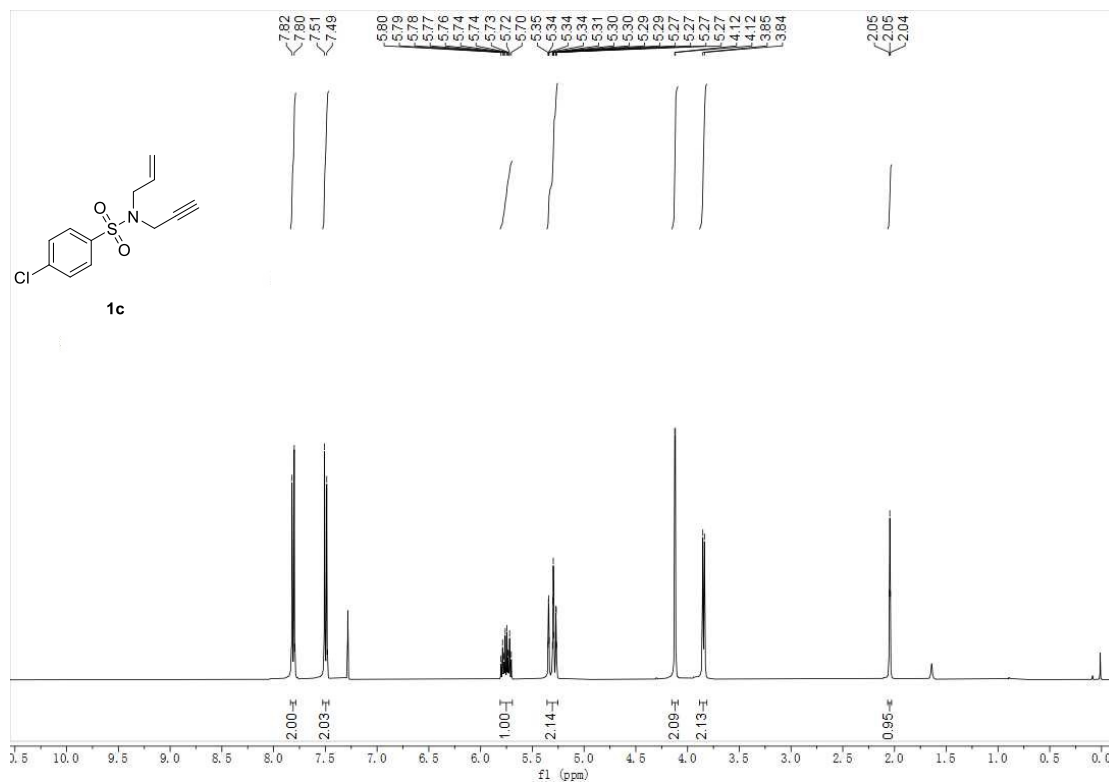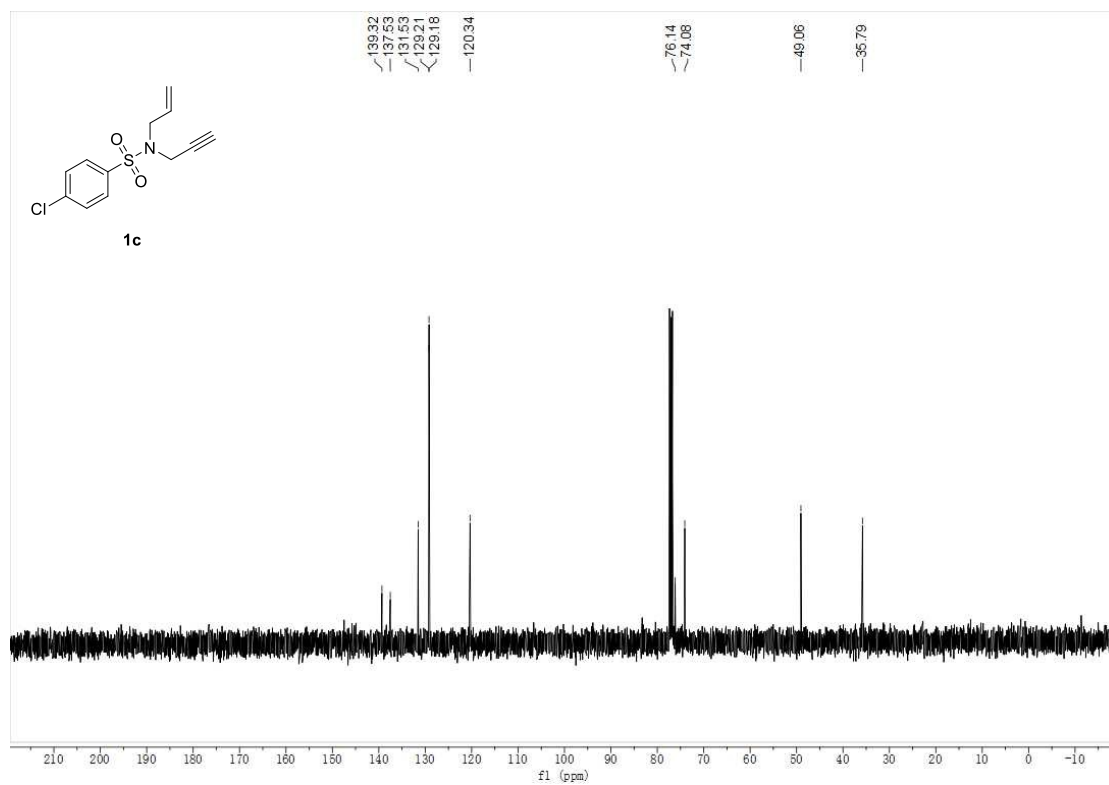

***N*-allyl-*N*-(prop-2-yn-1-yl)-[1,1'-biphenyl]-4-sulfonamide (1d)**

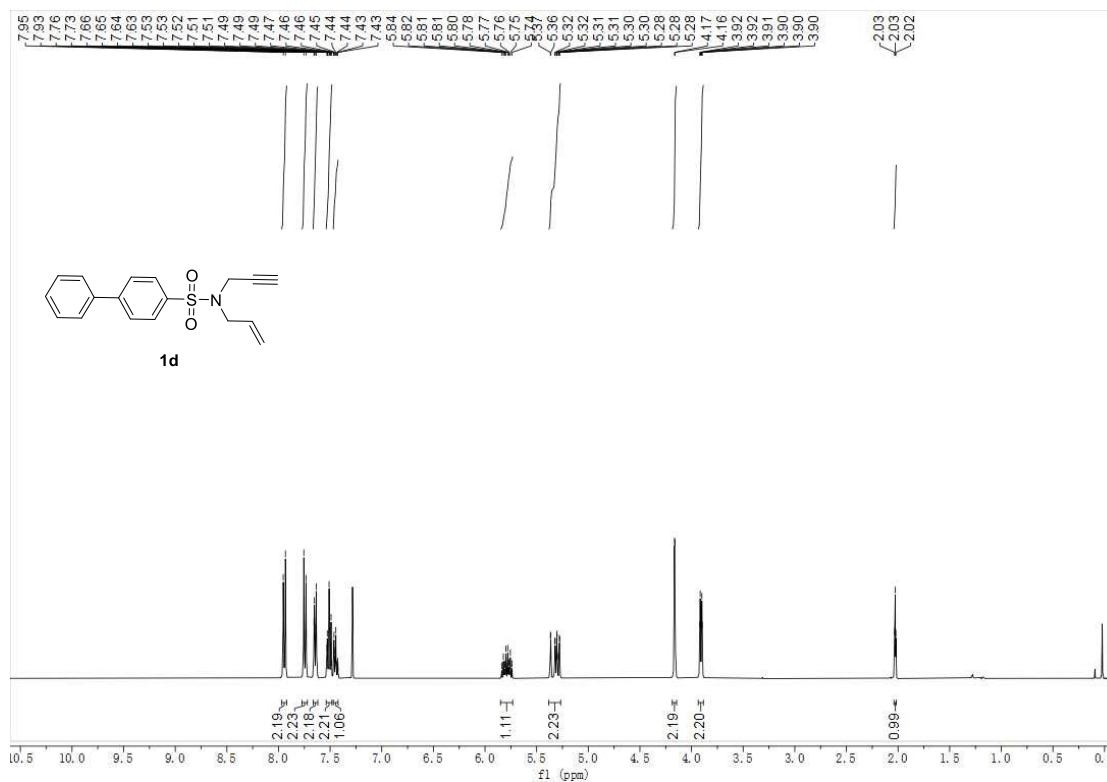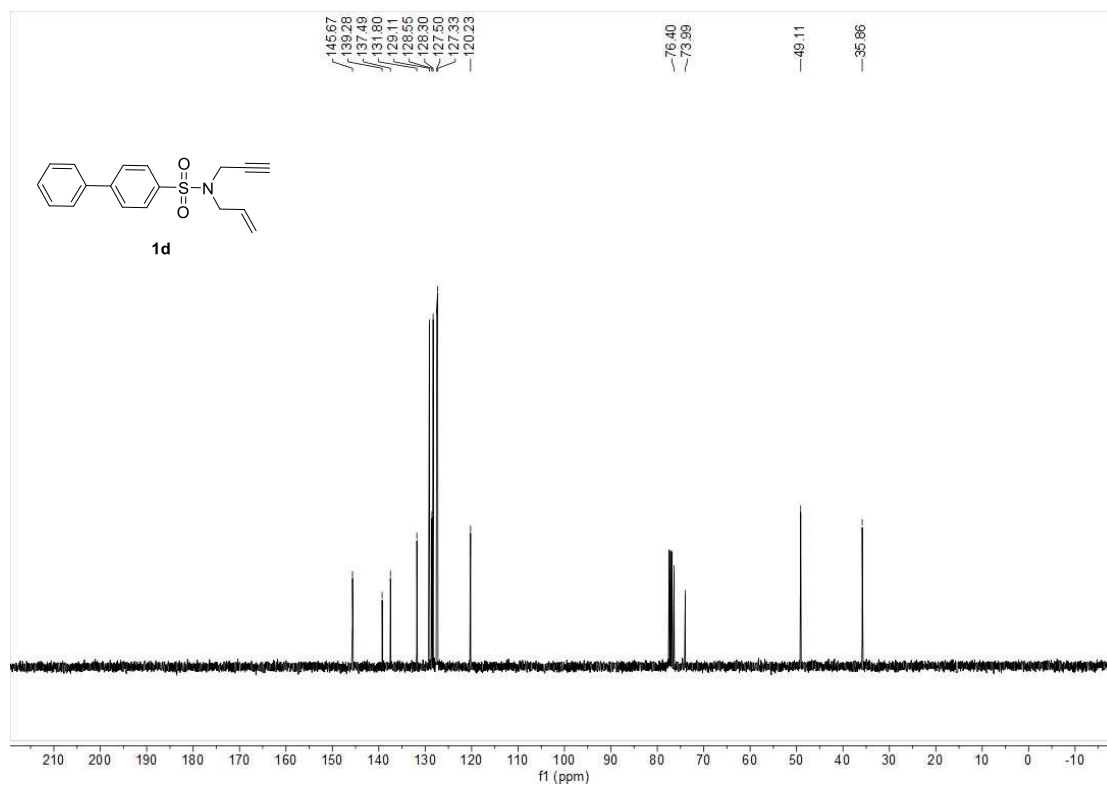

***N*-allyl-*N*-(prop-2-yn-1-yl)-4-(trifluoromethoxy)benzenesulfonamide (1f)**

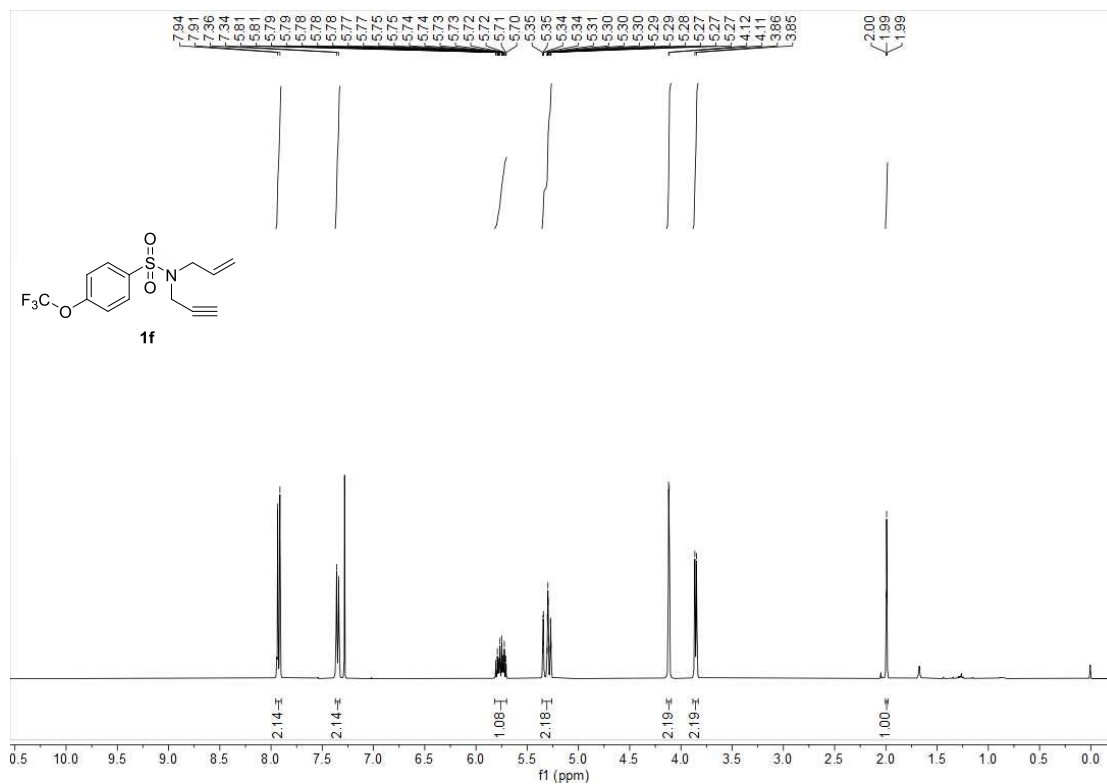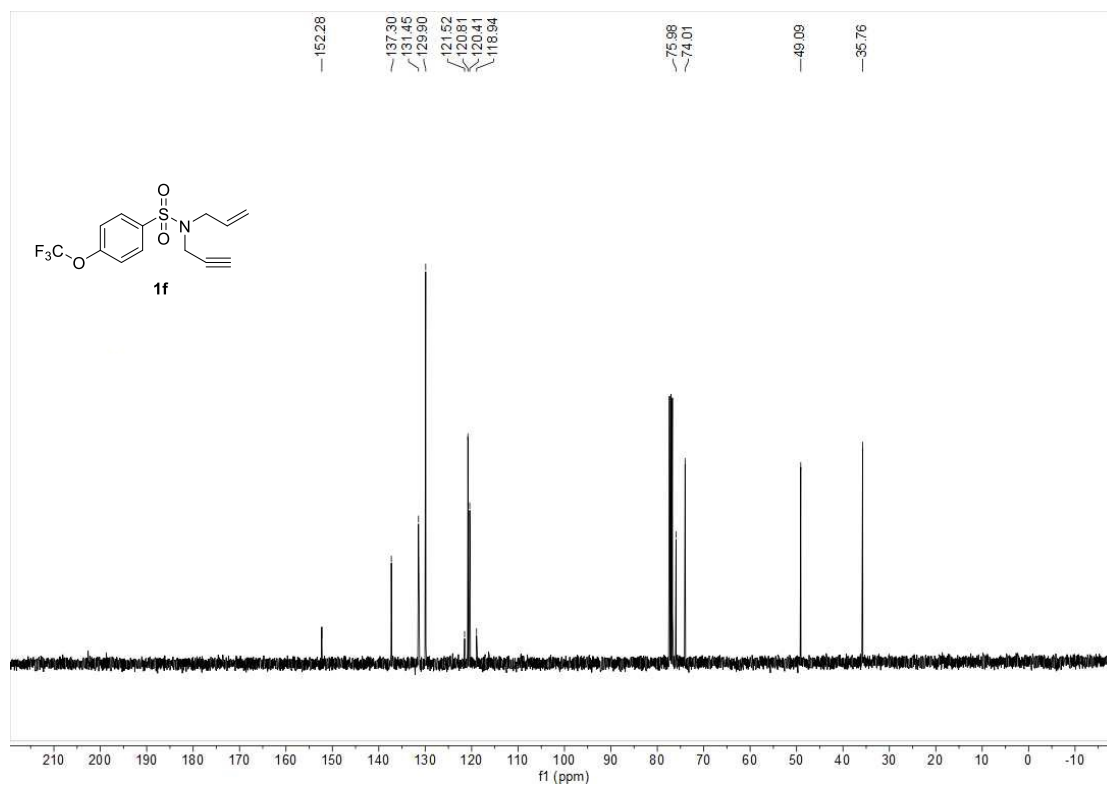

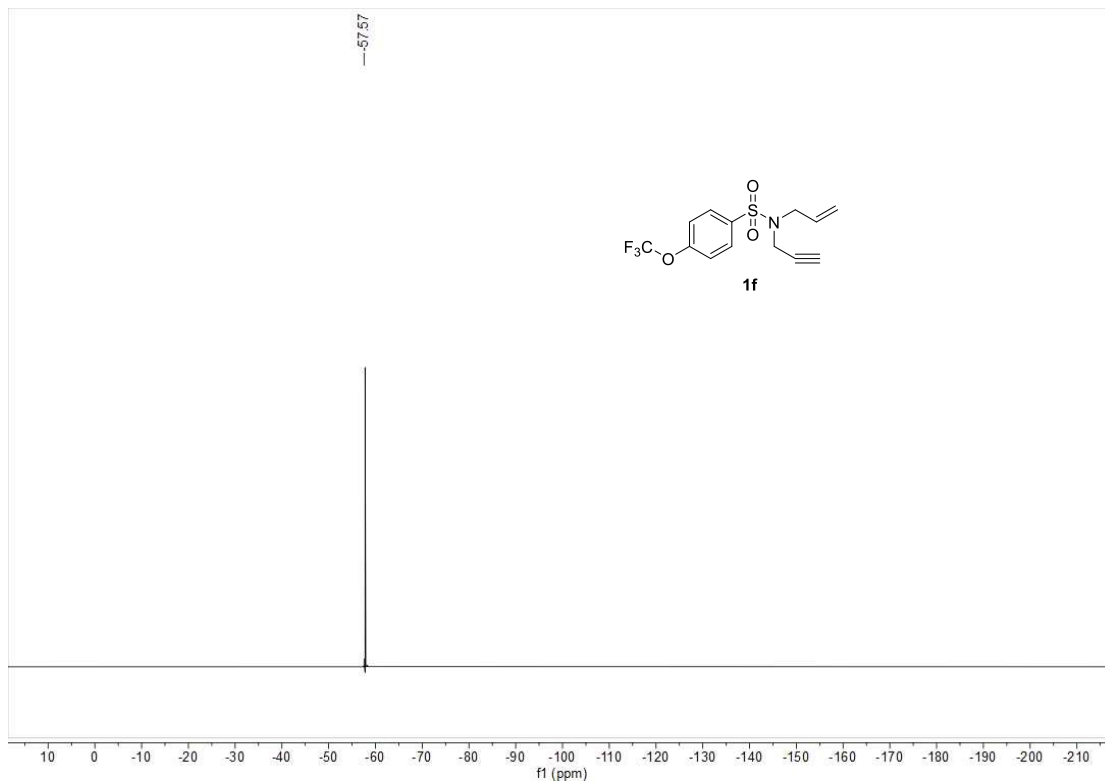

**Methyl 4-(*N*-allyl-*N*-(prop-2-yn-1-yl)sulfamoyl)benzoate (**1h**)**

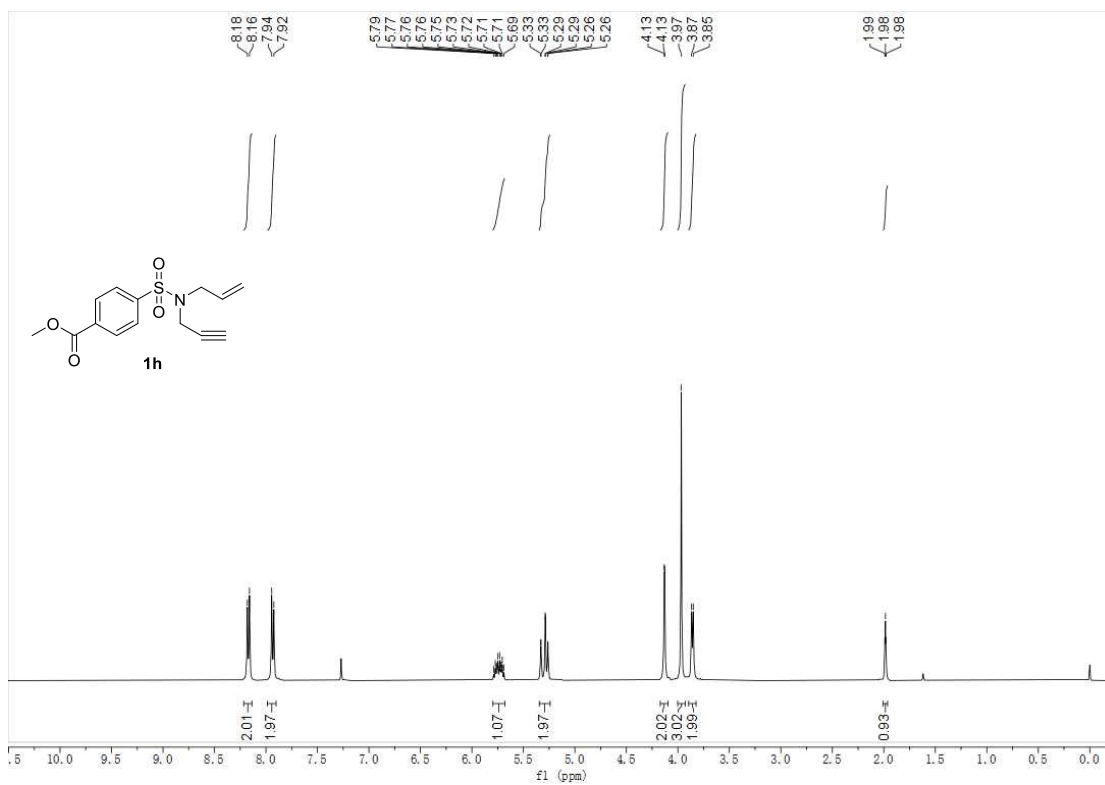



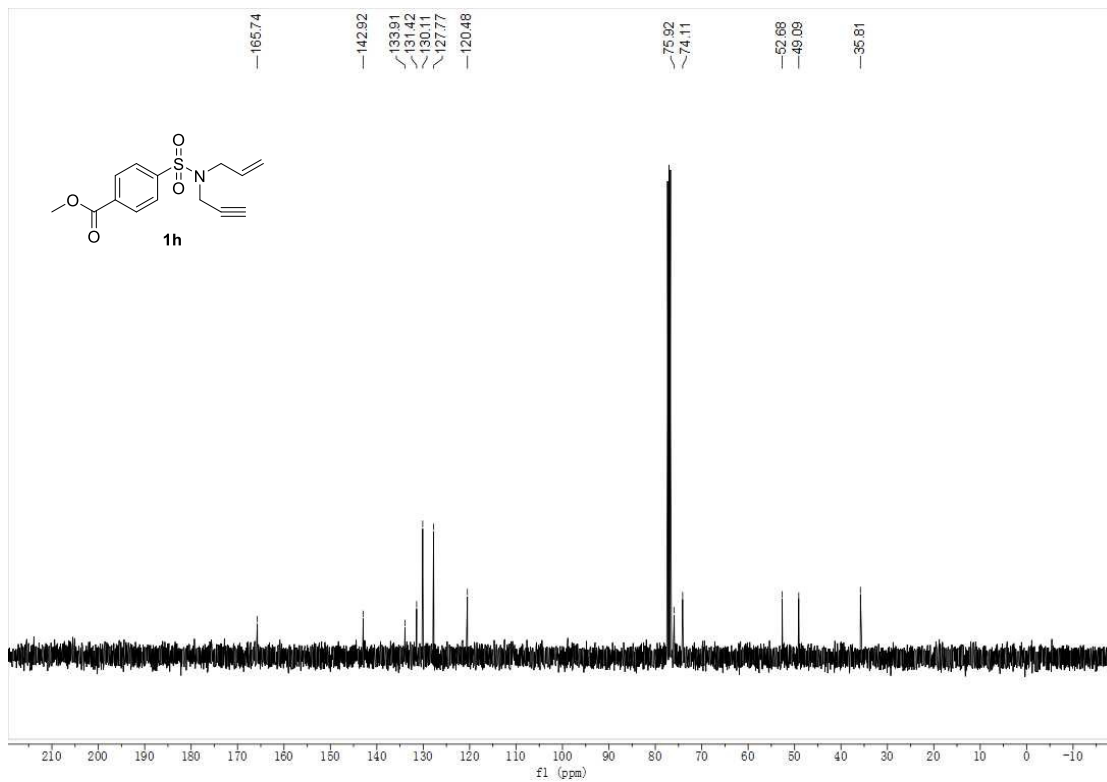

***N*-allyl-3-methyl-*N*-(prop-2-yn-1-yl)benzenesulfonamide (**1j**)**

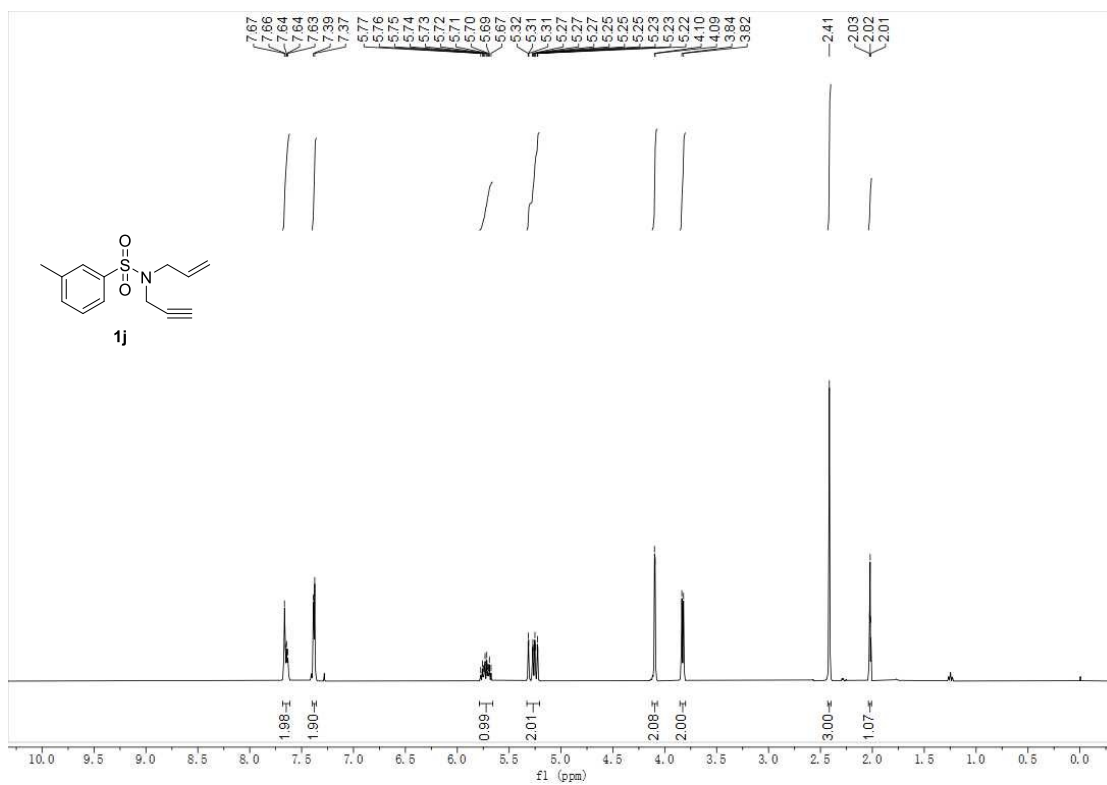

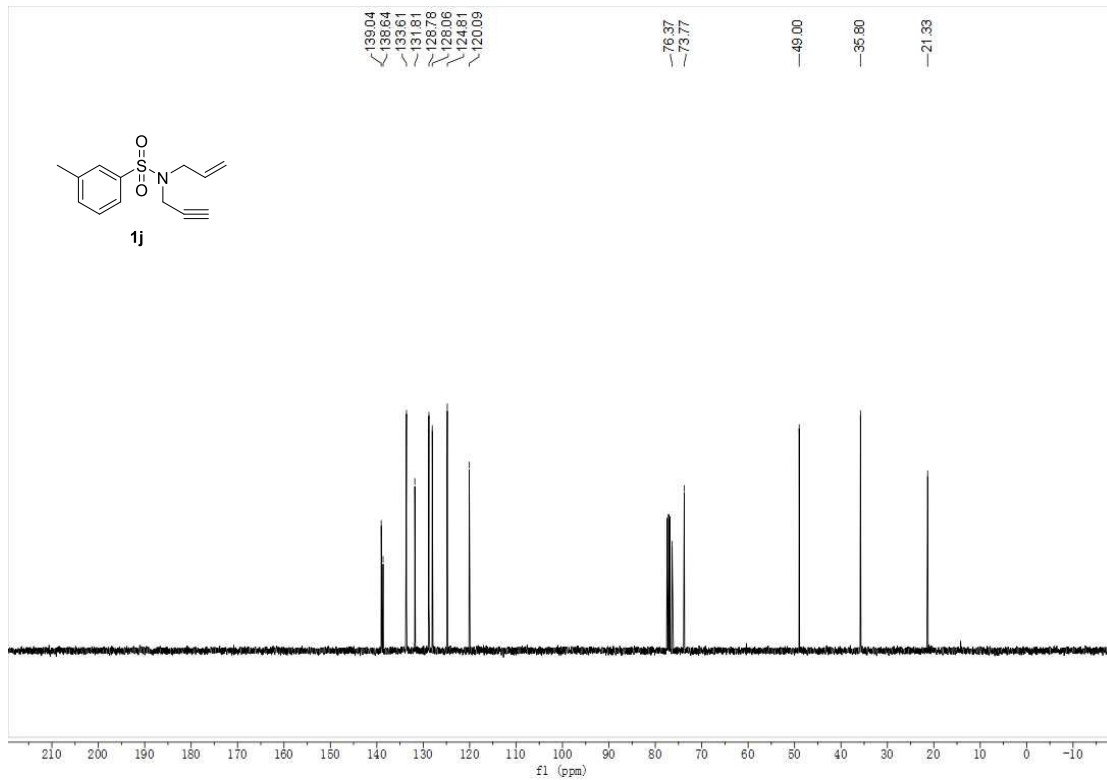

***N*-allyl-3-bromo-*N*-(prop-2-yn-1-yl)benzenesulfonamide (1k)**

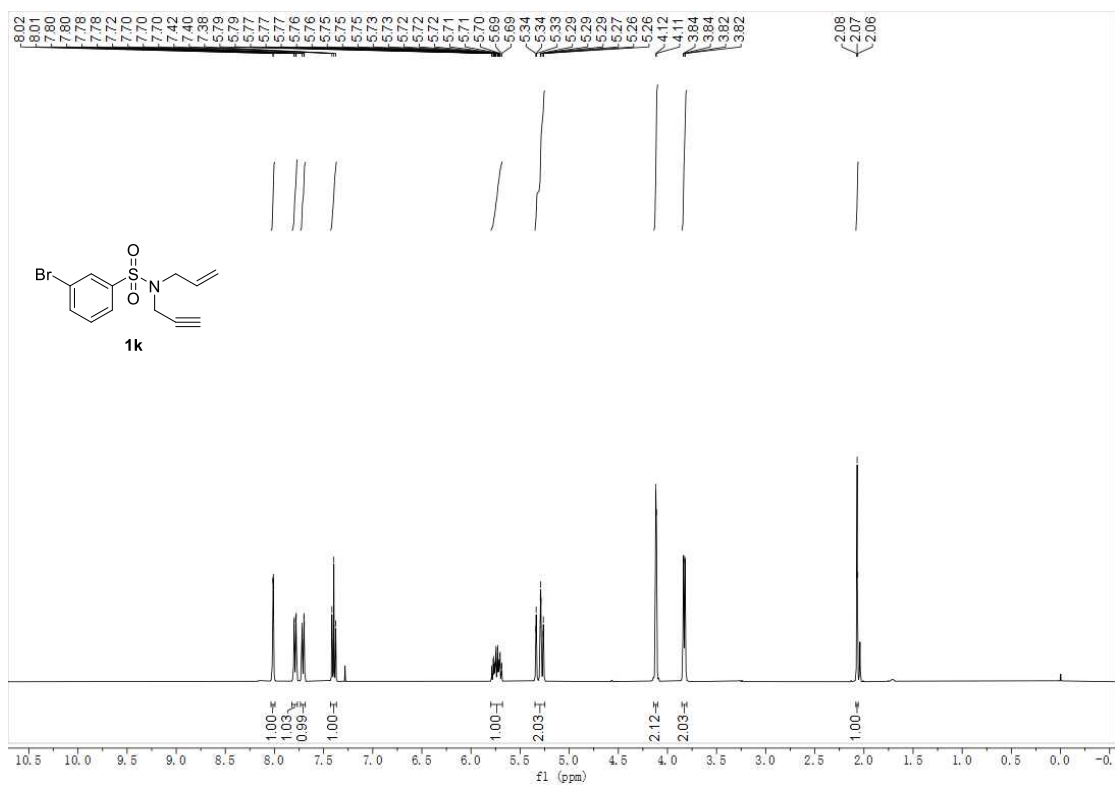

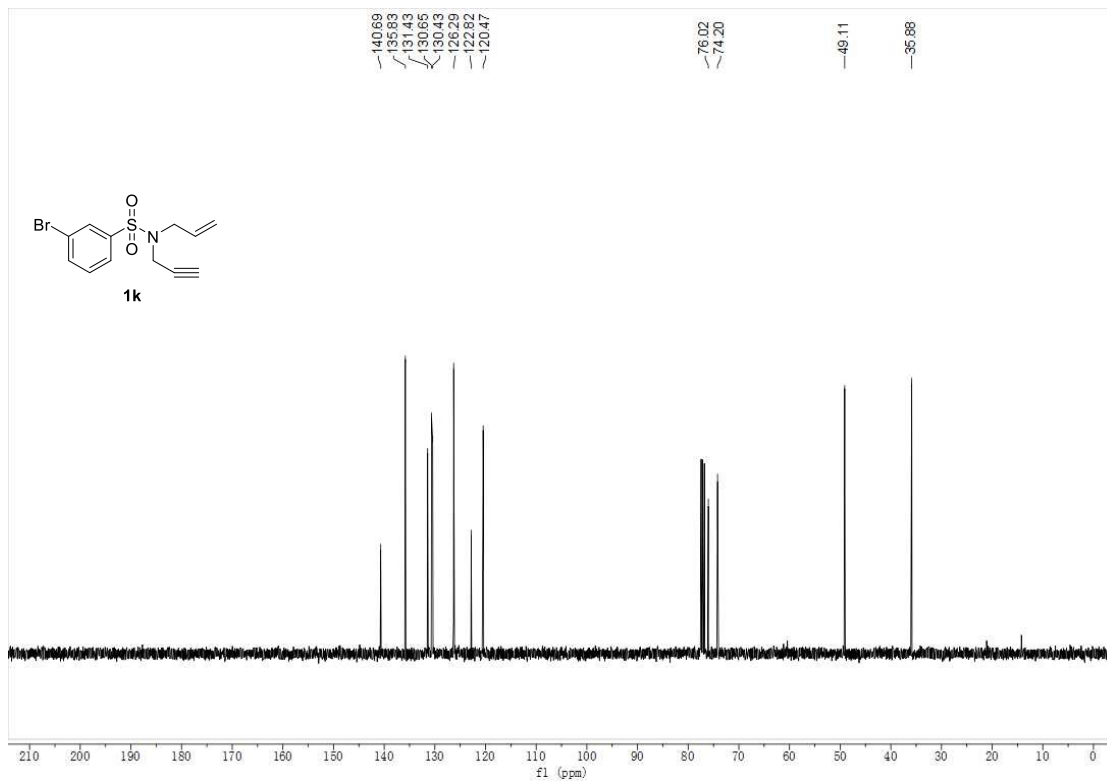

***N*-allyl-3,4-difluoro-*N*-(prop-2-yn-1-yl)benzenesulfonamide (1l)**

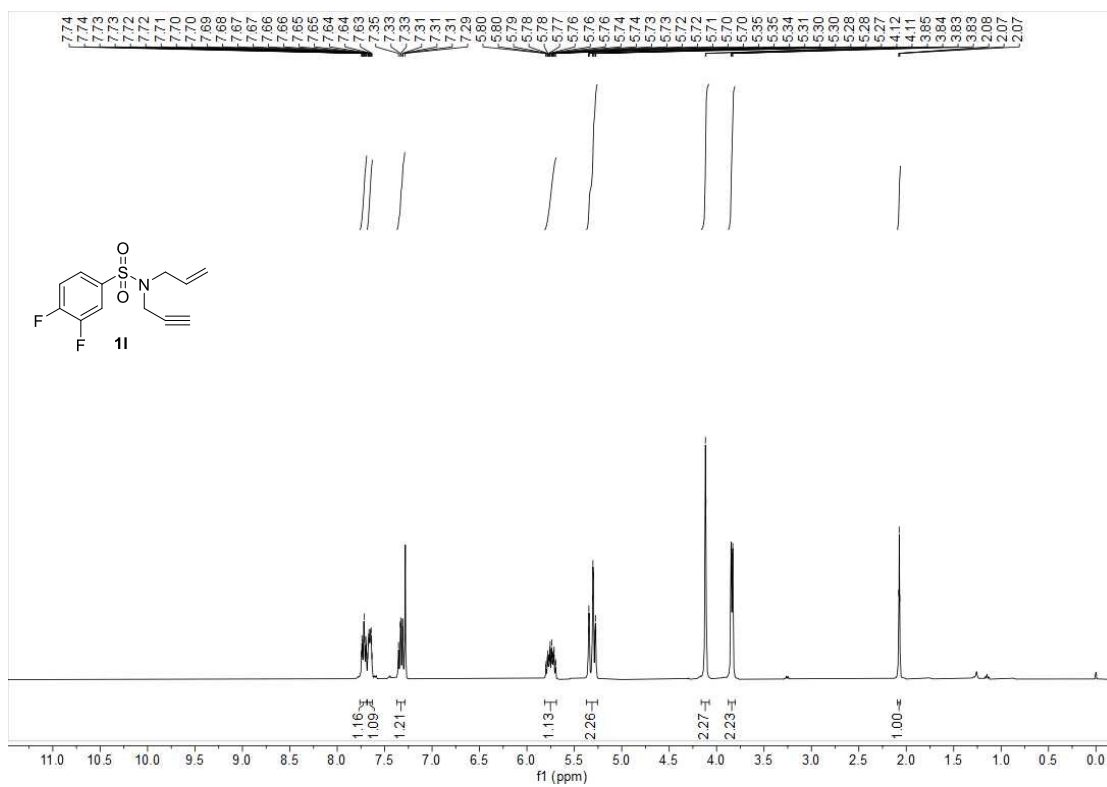

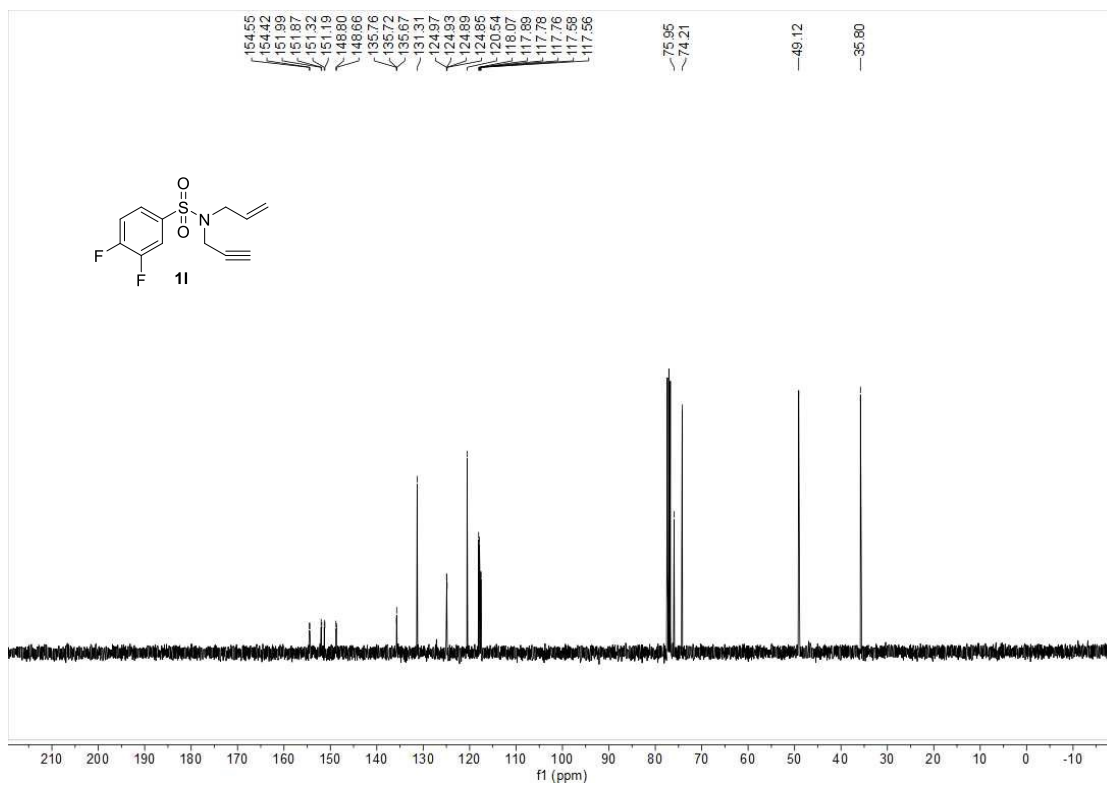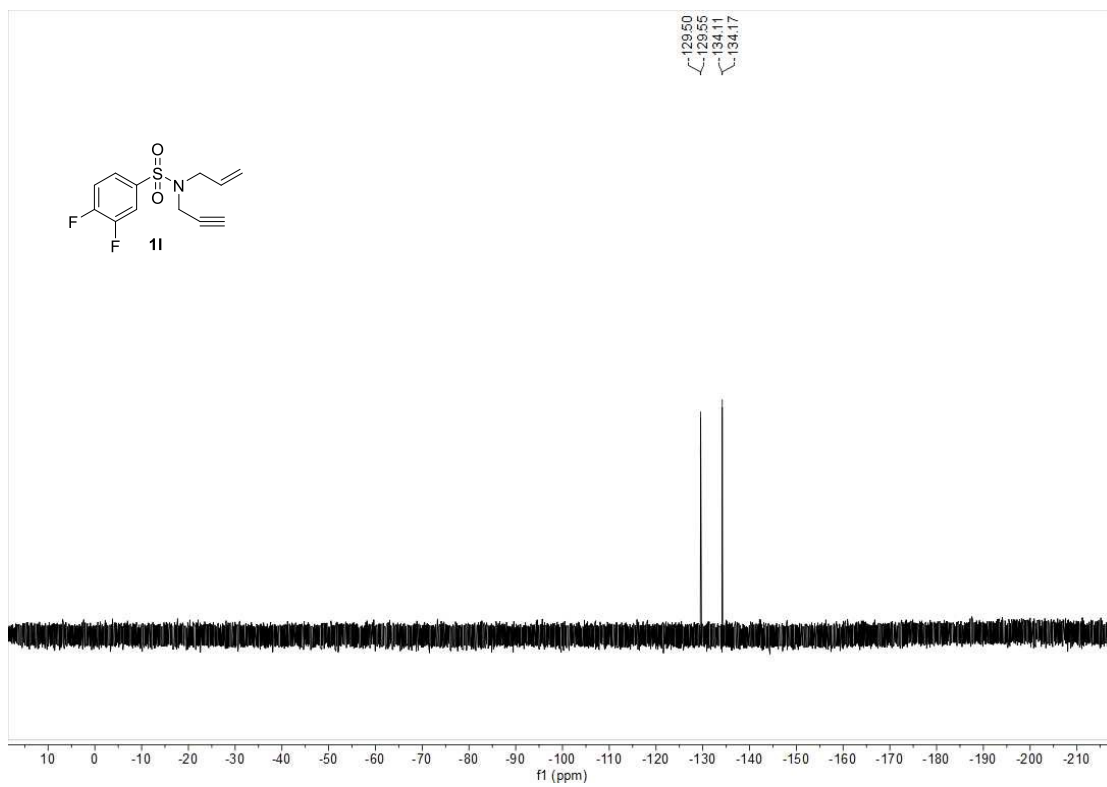

***N*-allyl-3,4-dimethoxy-*N*-(prop-2-yn-1-yl)benzenesulfonamide (1m)**

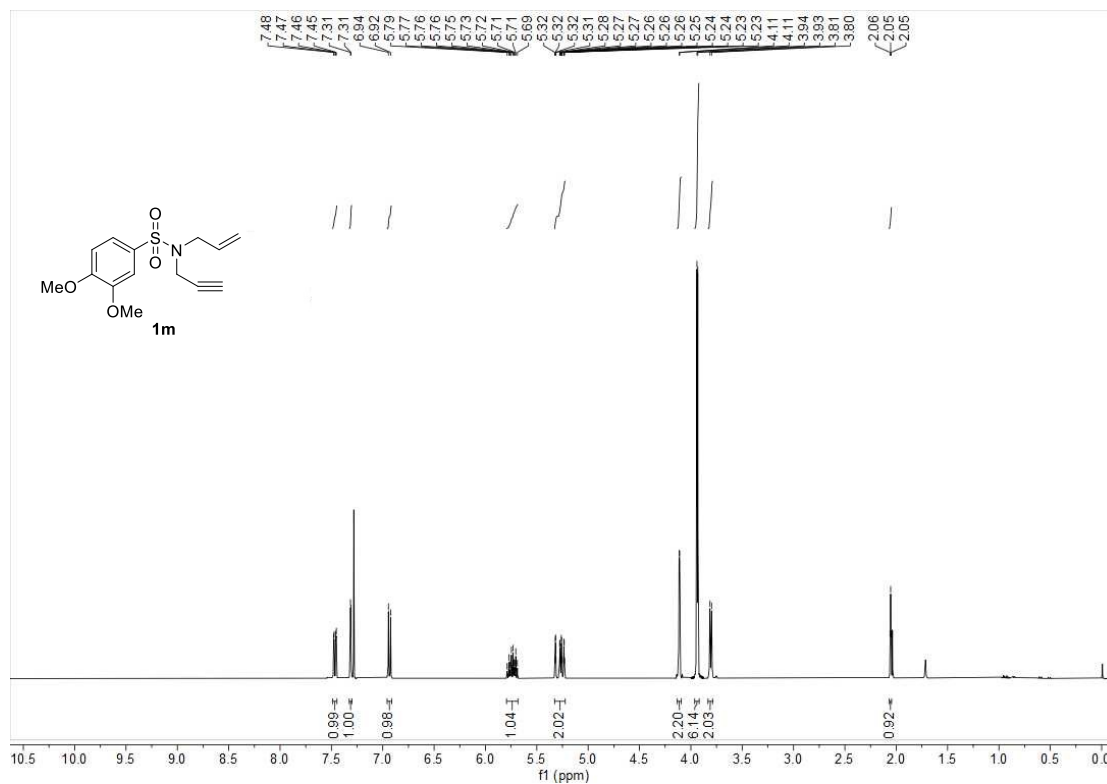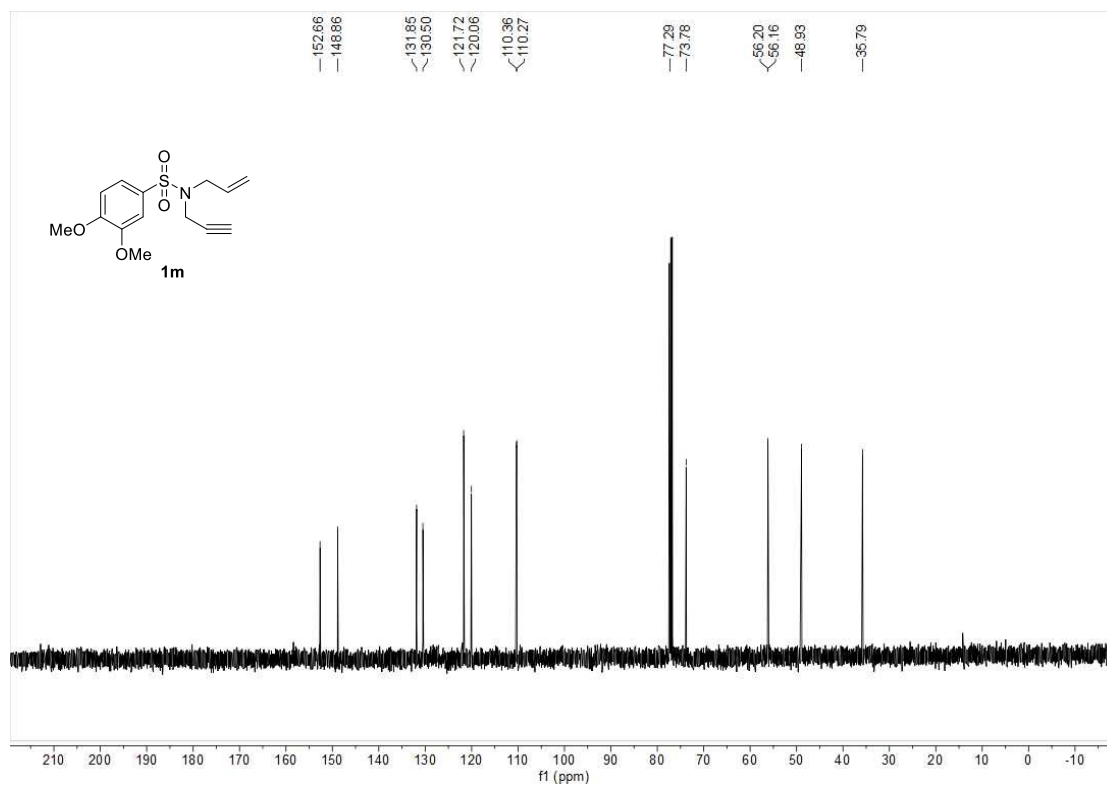

***N*-allyl-6-(dimethylamino)-*N*-(prop-2-yn-1-yl)naphthalene-2-sulfonamide (1o)**

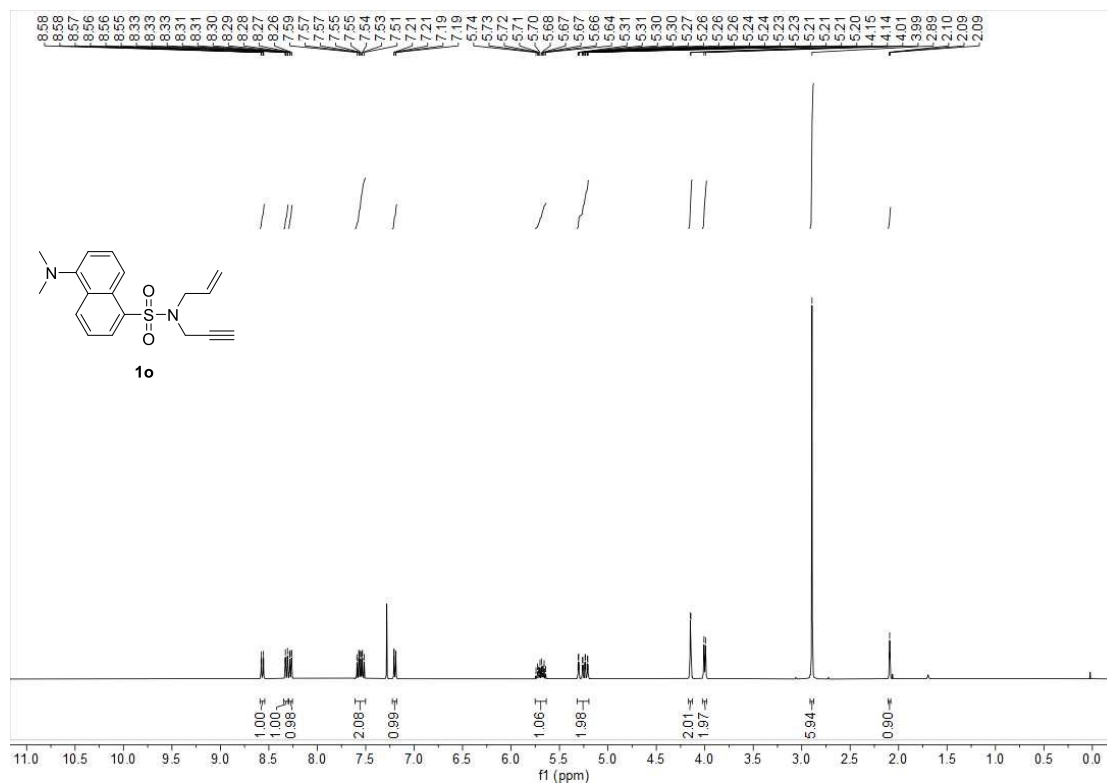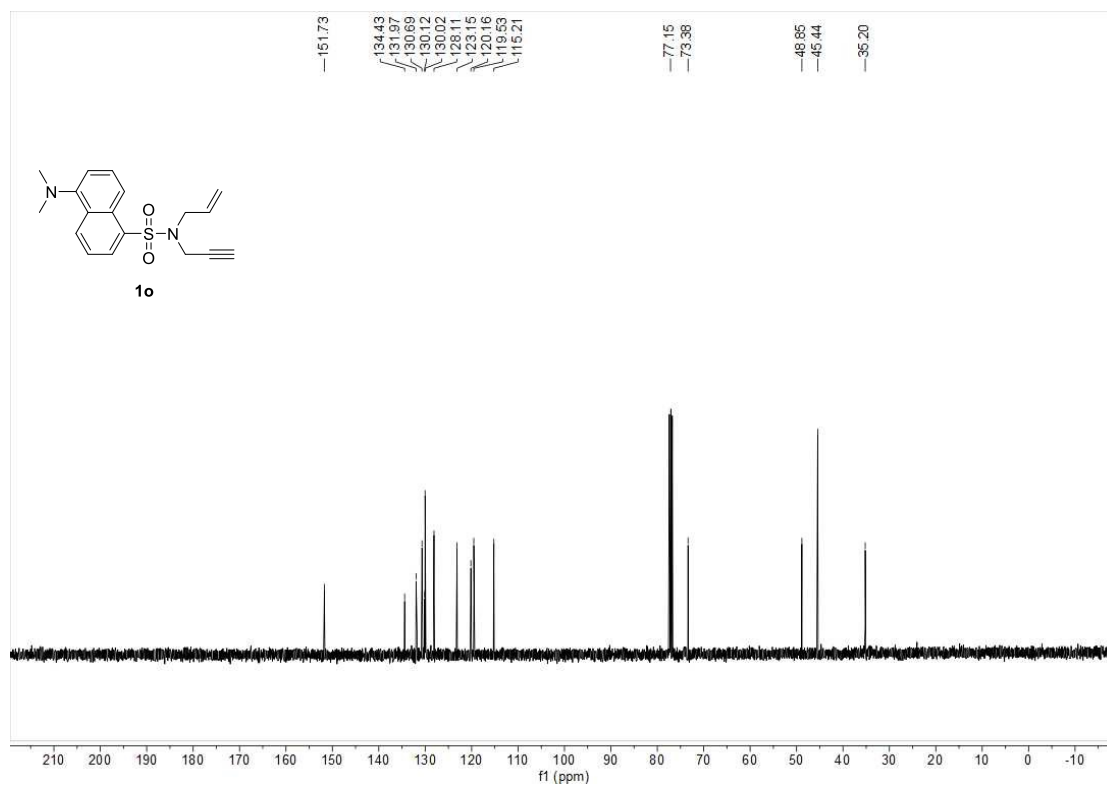

***N*-allyl-*N*-(prop-2-yn-1-yl)pyridine-3-sulfonamide (**1q**)**

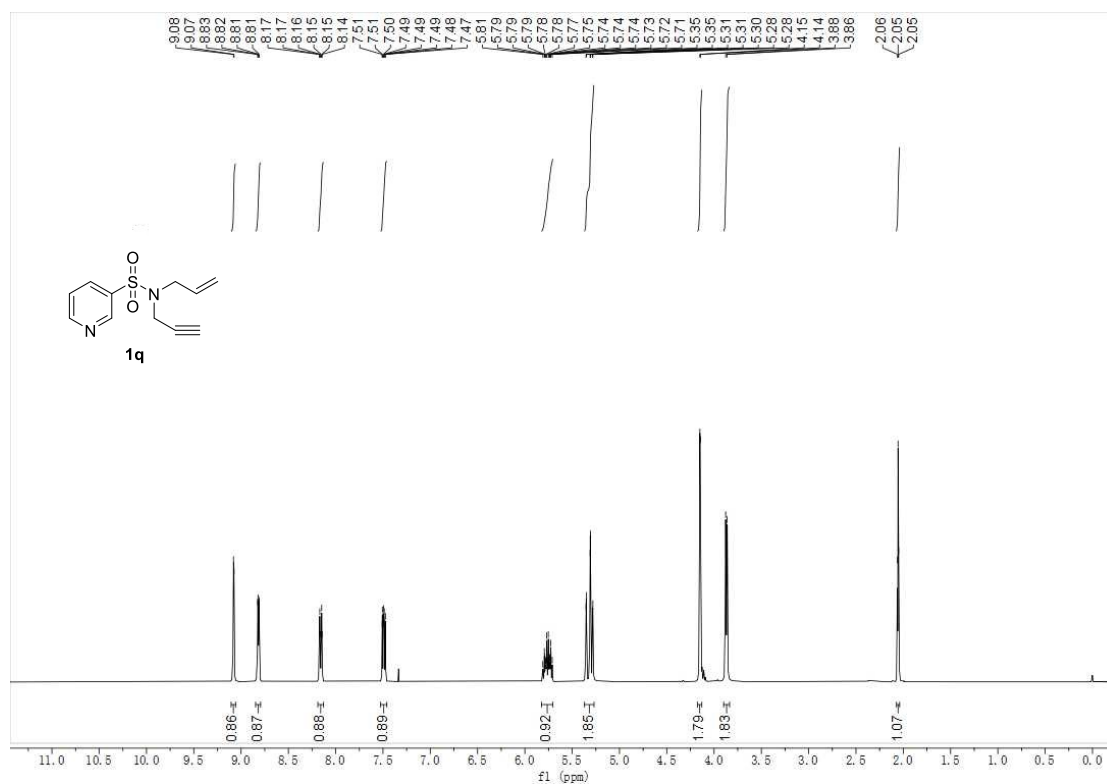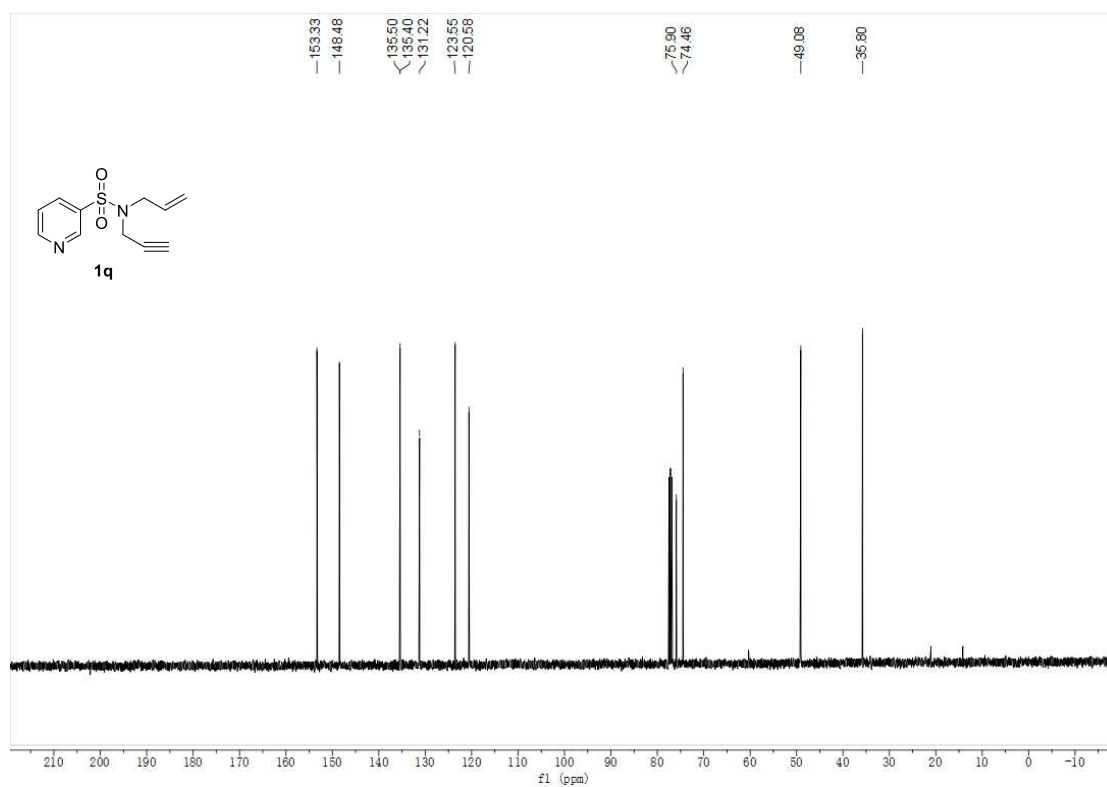

***N*-allyl-*N*-(prop-2-yn-1-yl)ethanesulfonamide (1s)**

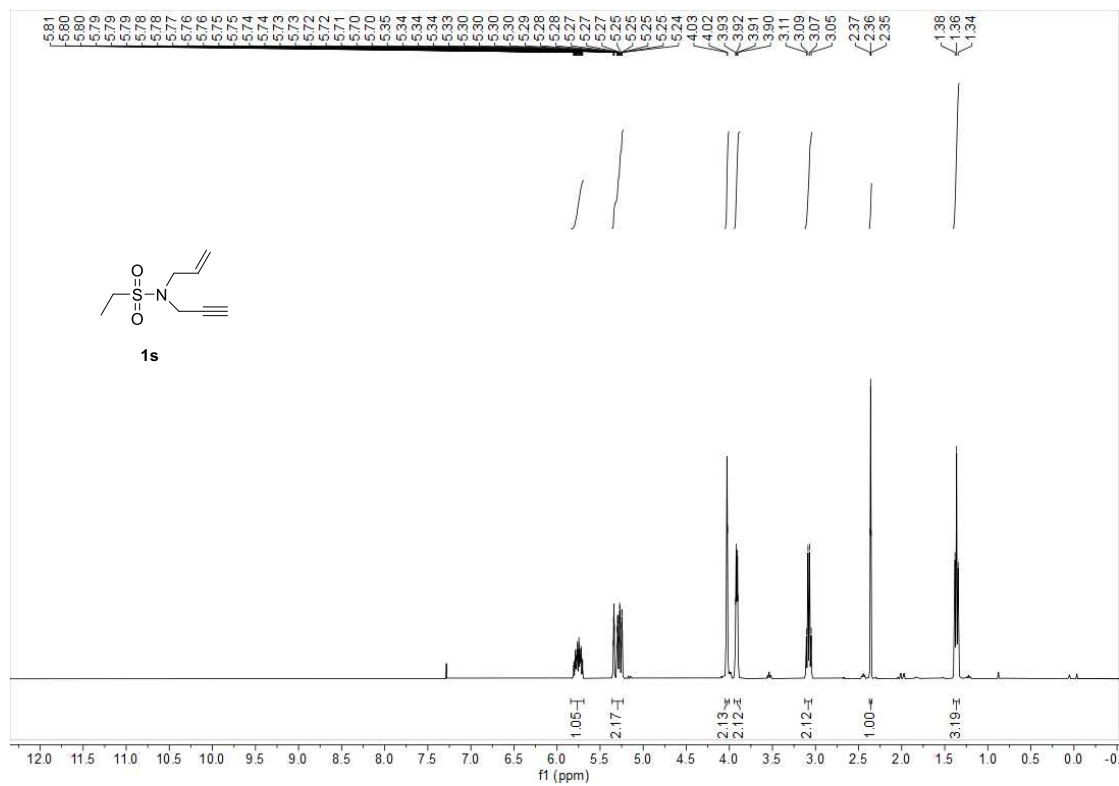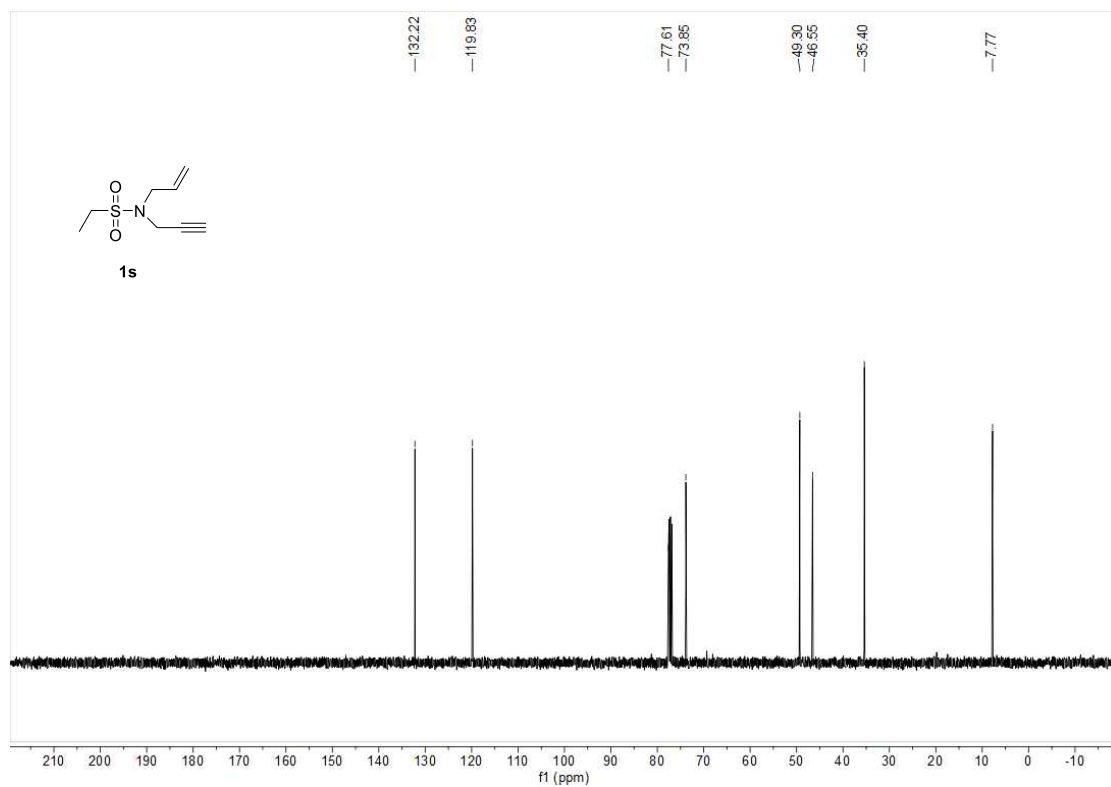



### *N*-allyl-*N*-(but-2-yn-1-yl)-4-methylbenzenesulfonamide (**1t**)

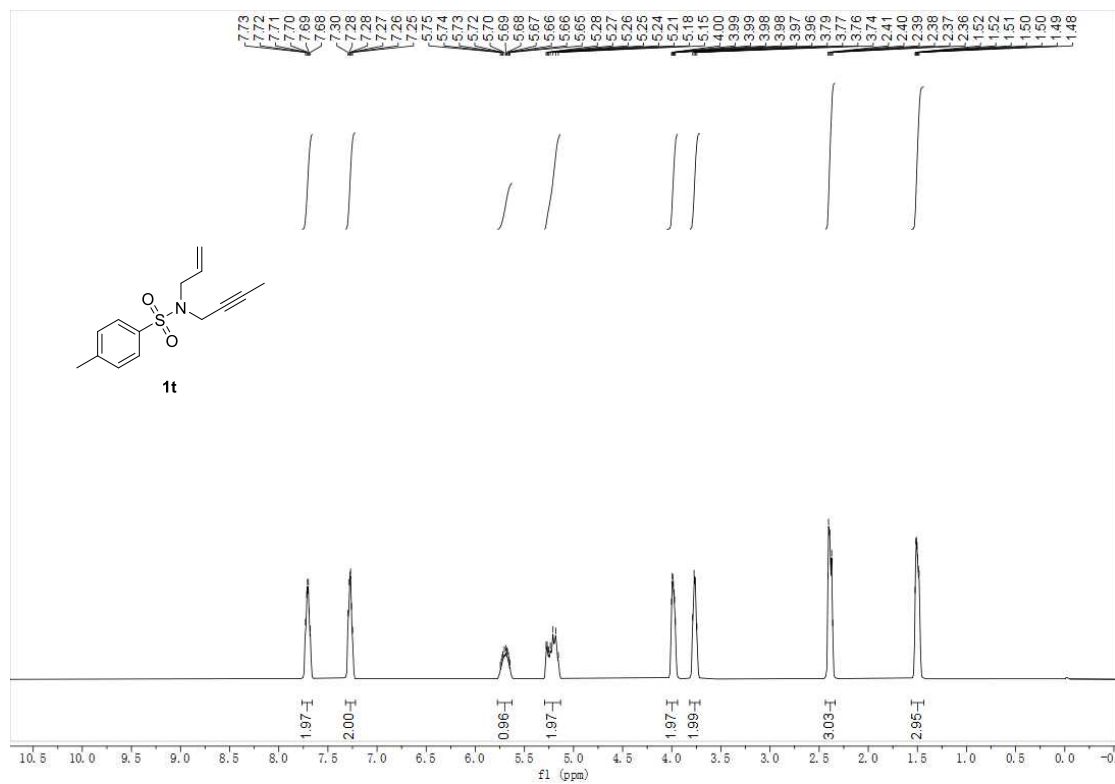

### diethyl 2-allyl-2-(prop-2-yn-1-yl)malonate (**1u**)

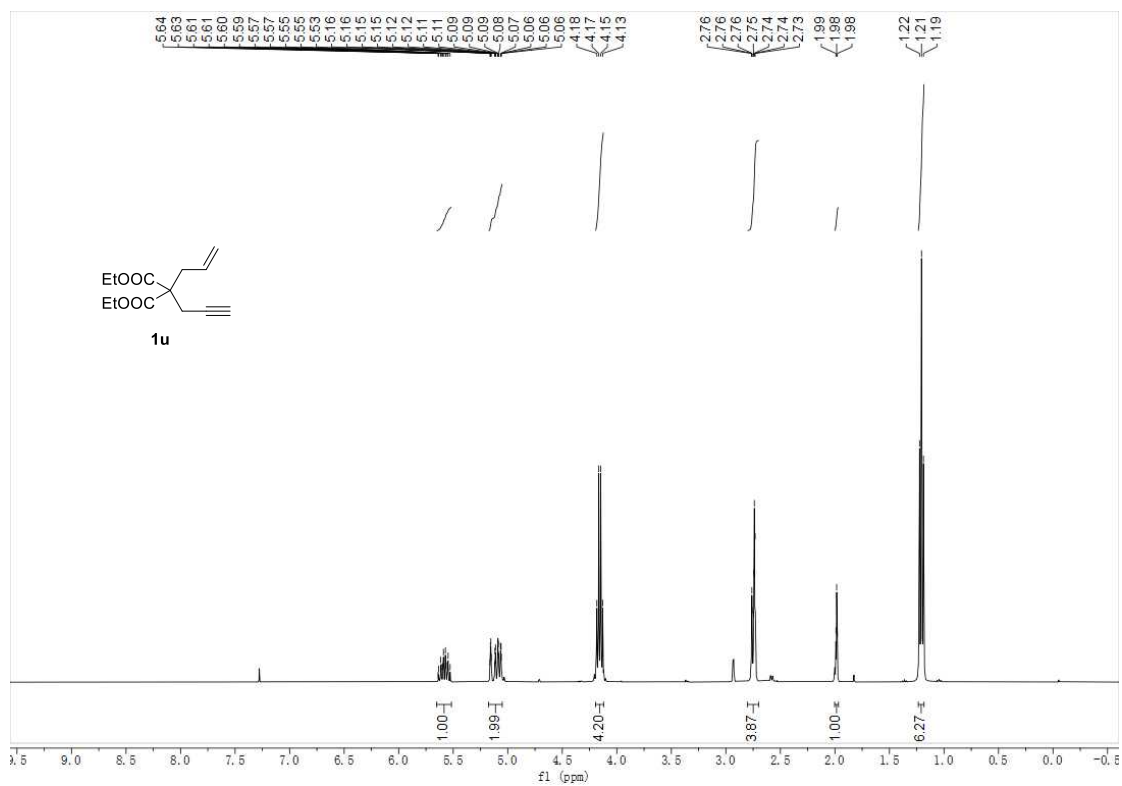

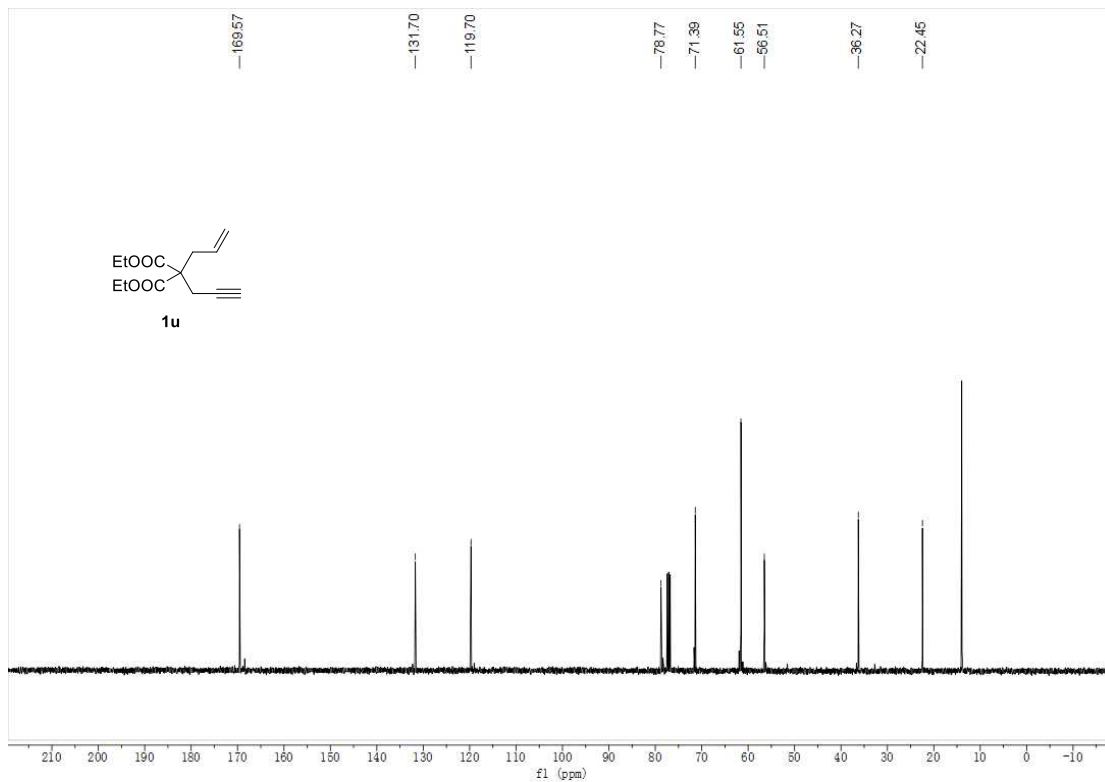

**(E)-3-methyl-1-tosyl-4-((triethylsilyl)methylene)pyrrolidine (3a)**

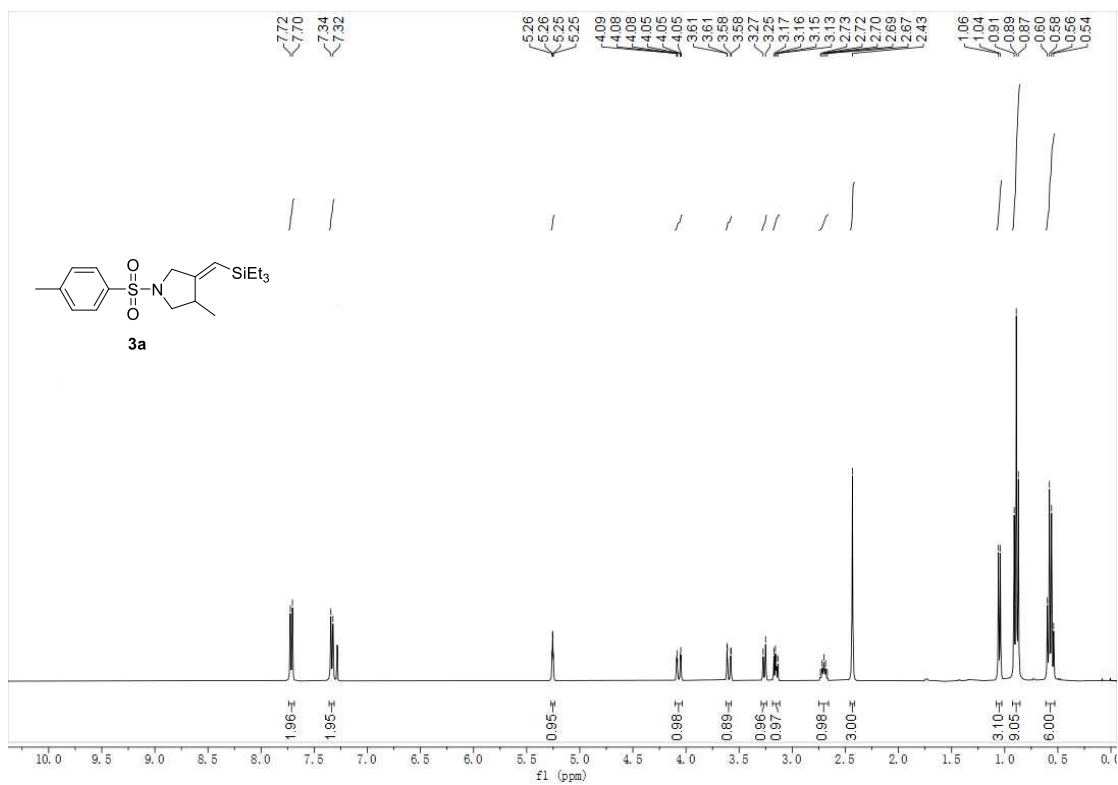

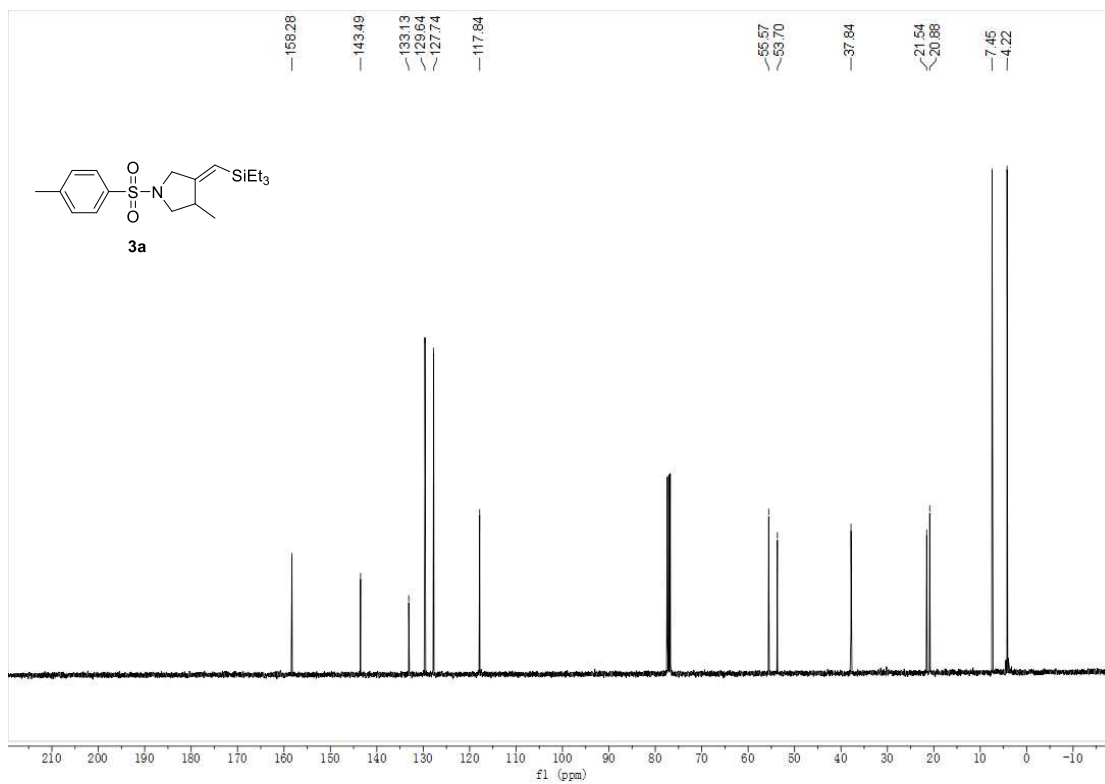

**(E)-N-allyl-4-methyl-N-(3-(triethylsilyl)allyl)benzenesulfonamide (4a)**

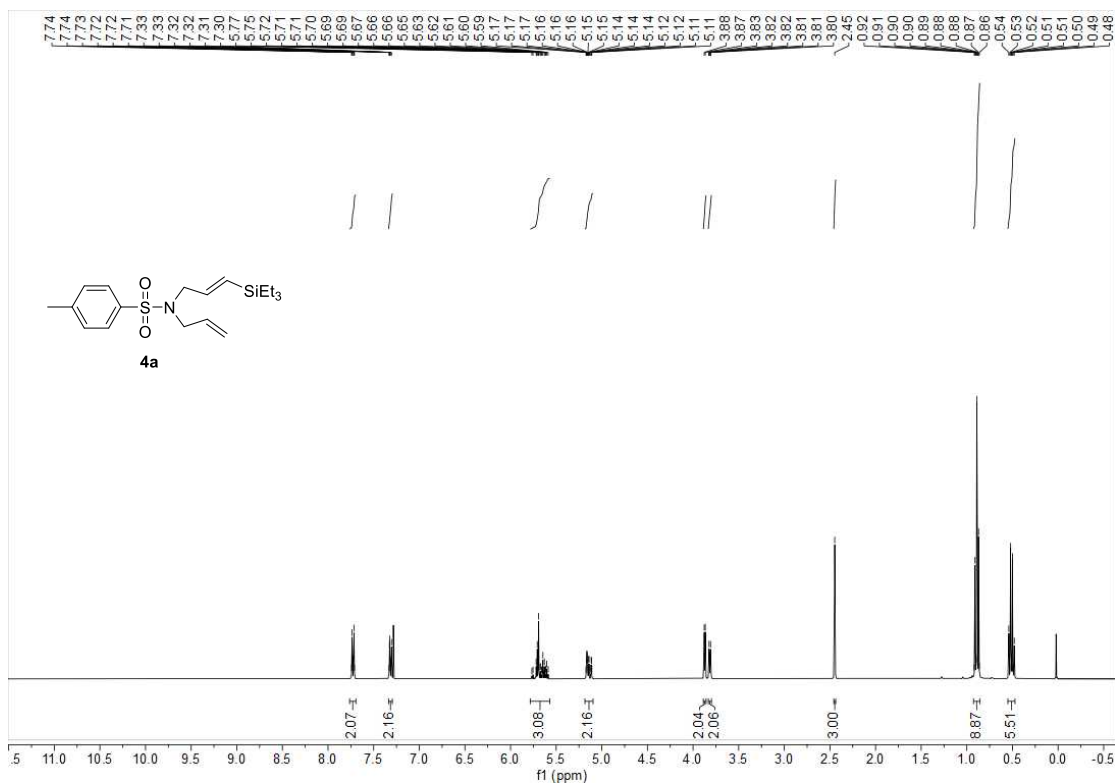

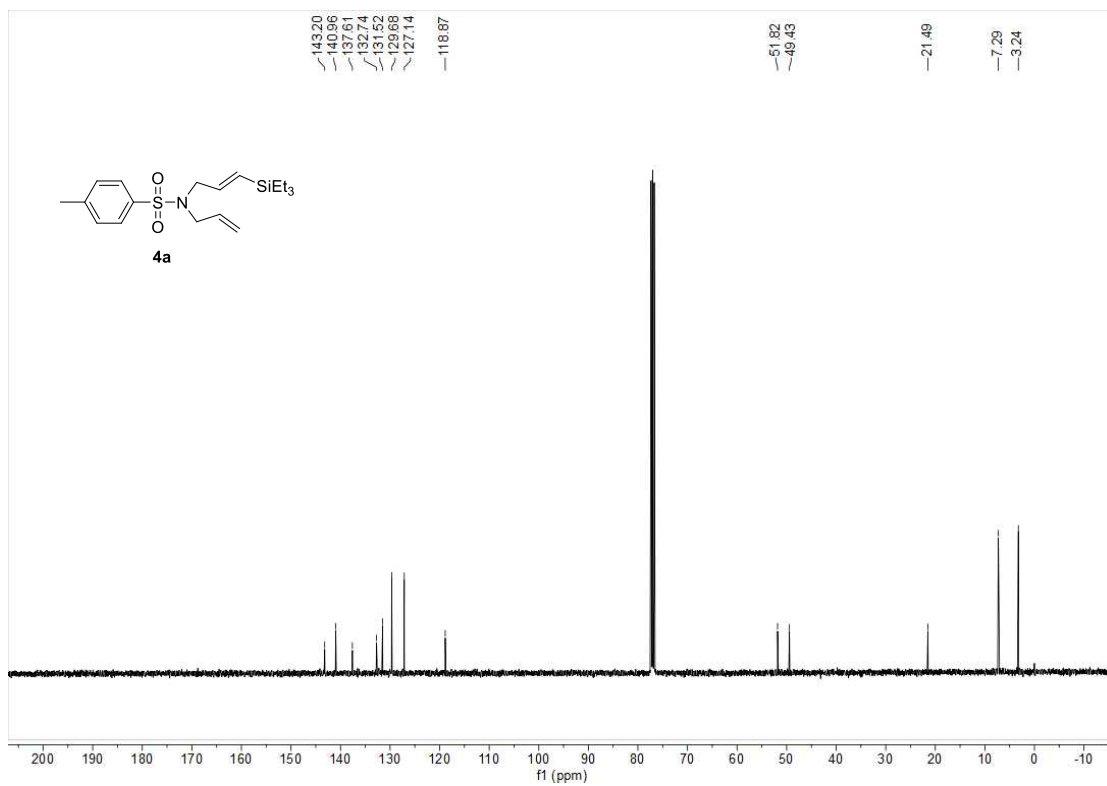

**(E)-3-methyl-1-(phenylsulfonyl)-4-((triethylsilyl)methylene)pyrrolidine (3b)**

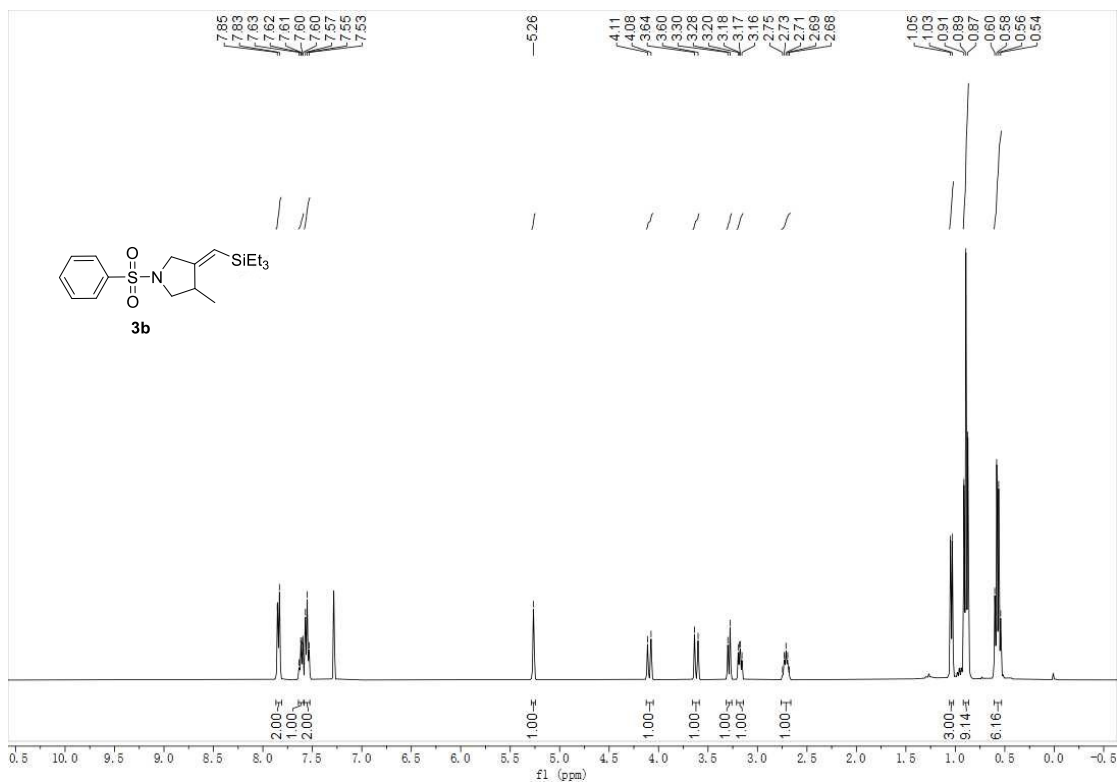

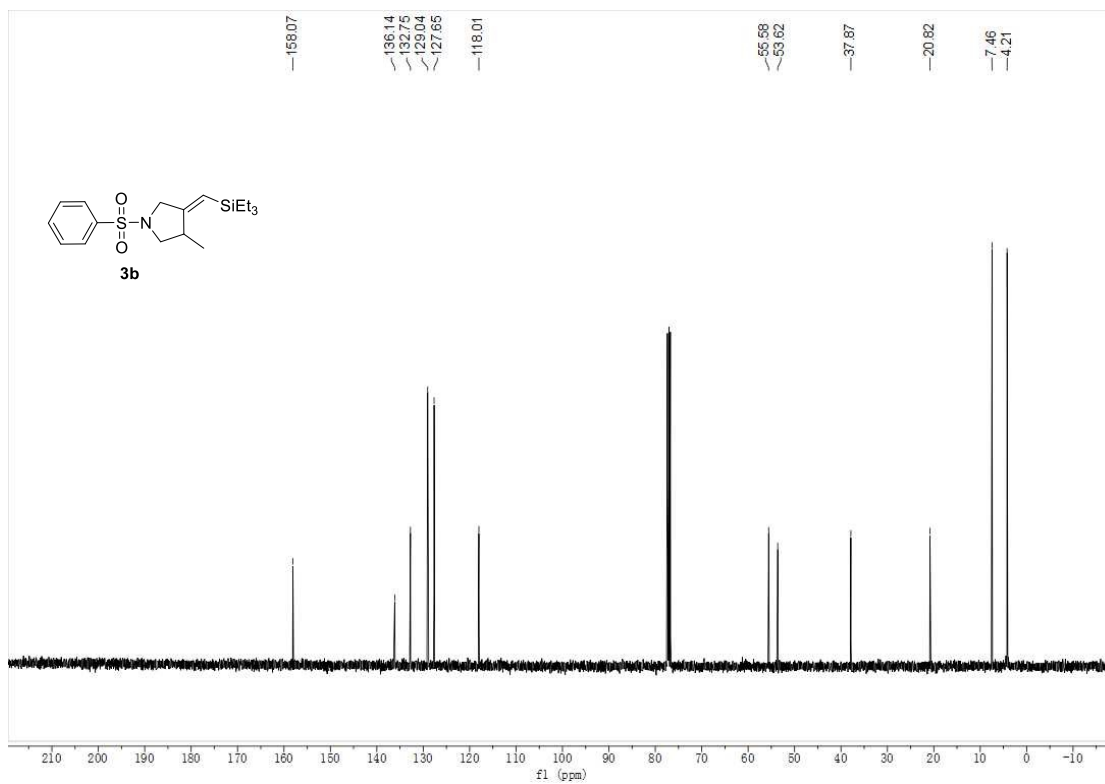

**(E)-1-((4-chlorophenyl)sulfonyl)-3-methyl-4-((triethylsilyl)methylene)pyrrolidine (3c)**

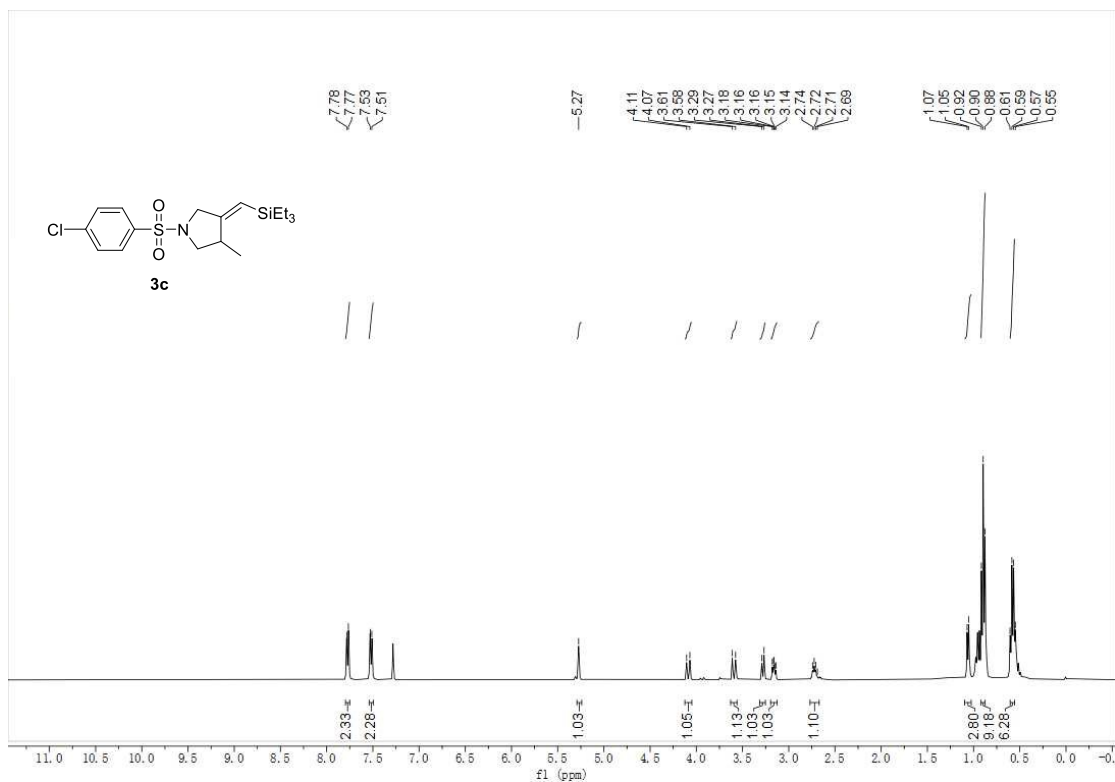

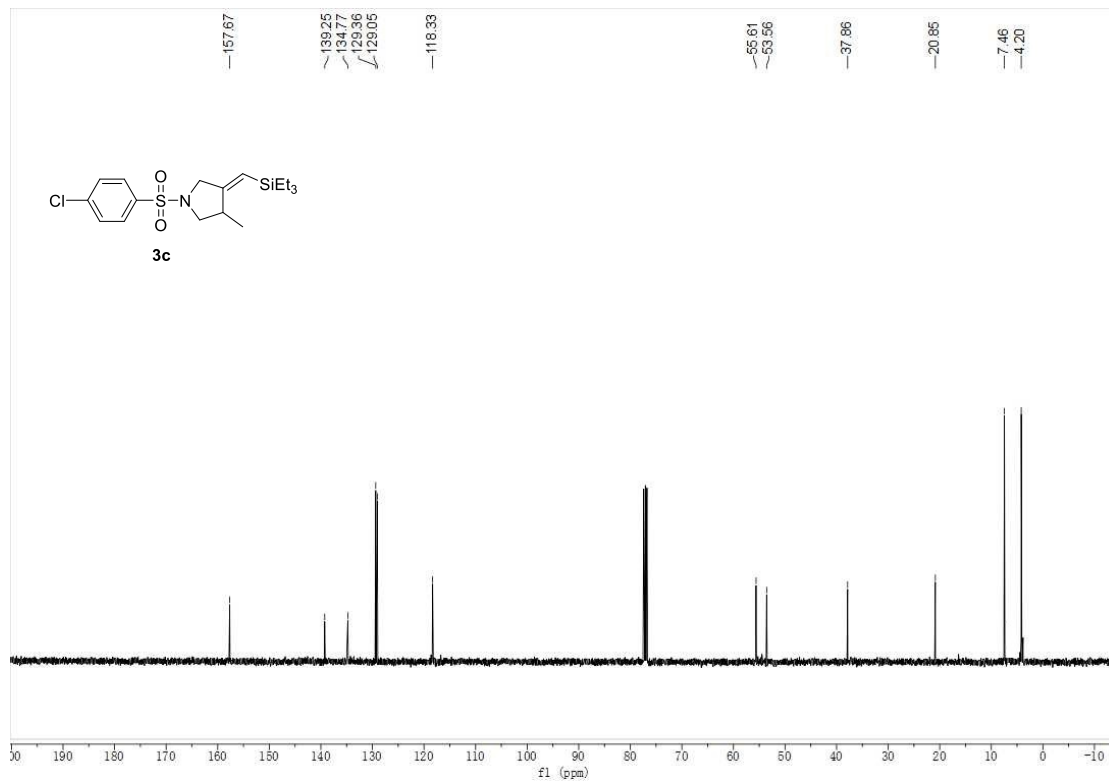

**(E)-1-([1,1'-biphenyl]-4-ylsulfonyl)-3-methyl-4-((triethylsilyl)methylene)pyrrolidine (3d)**

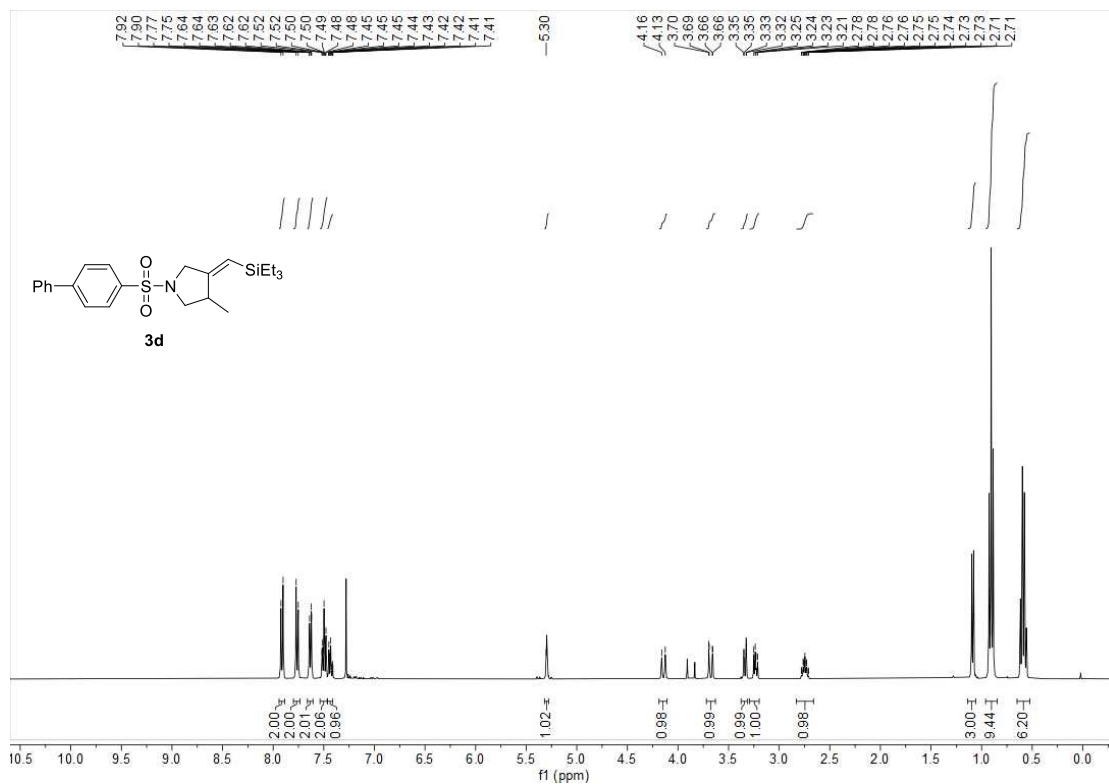

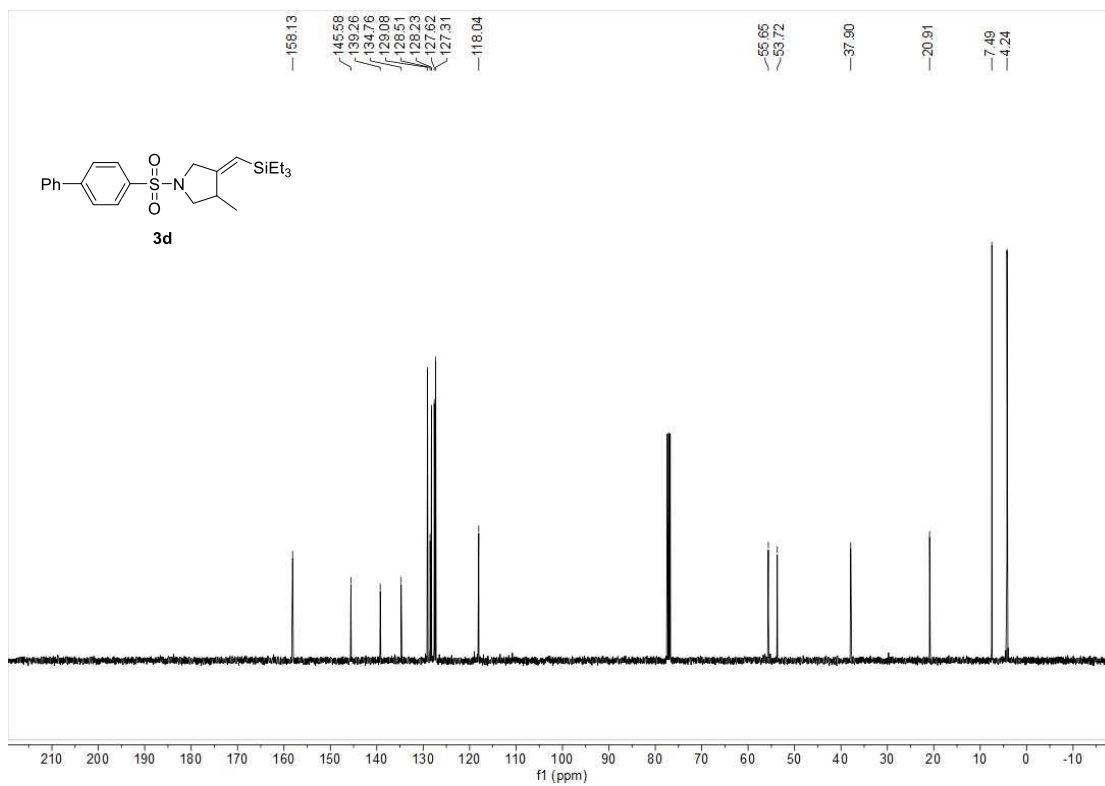

**(E)-1-((4-methoxyphenyl)sulfonyl)-3-methyl-4-((triethylsilyl)methylene)pyrrolidine (3e)**

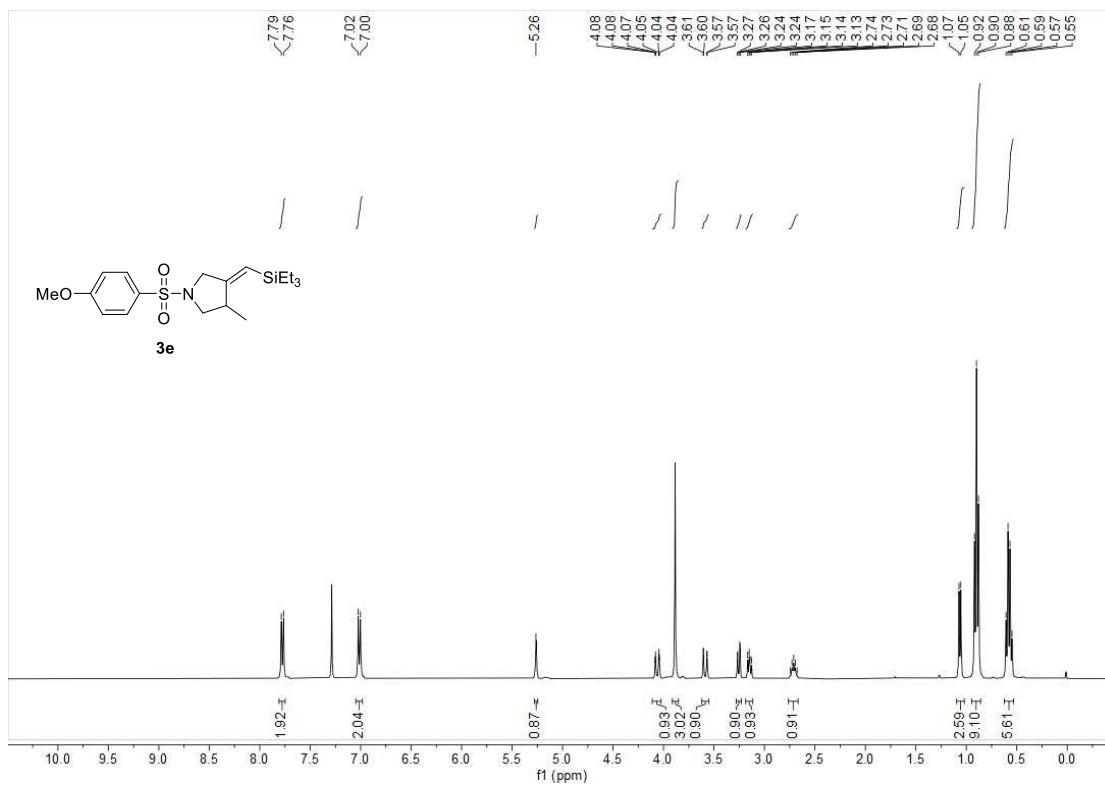

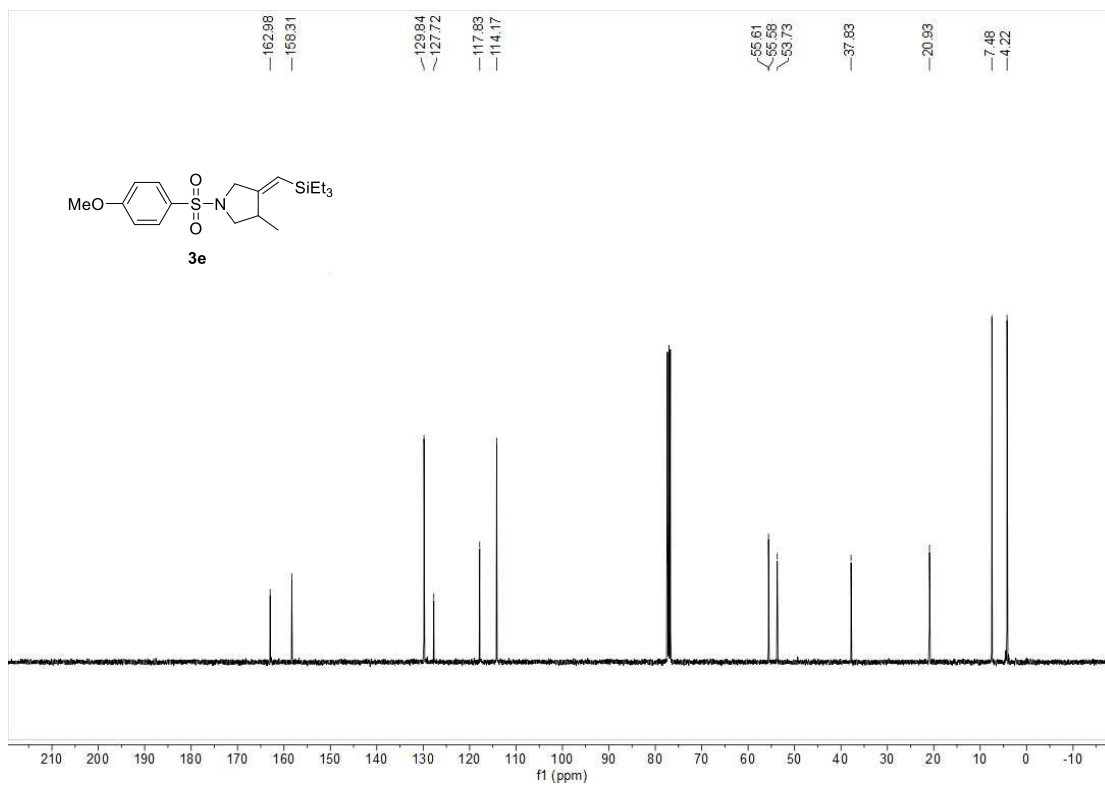

**(E)-3-methyl-4-((triethylsilyl)methylene)-1-((4-(trifluoromethoxy)phenyl)sulfonyl)pyrrolidine (**3f**)**

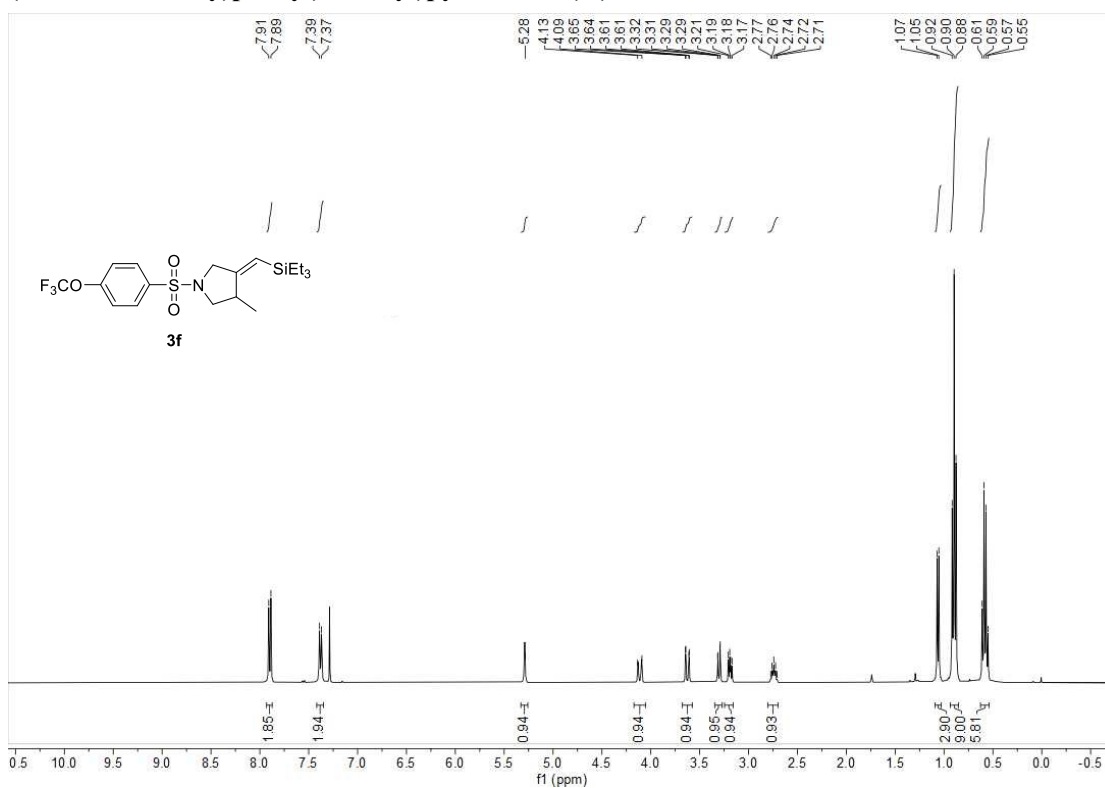



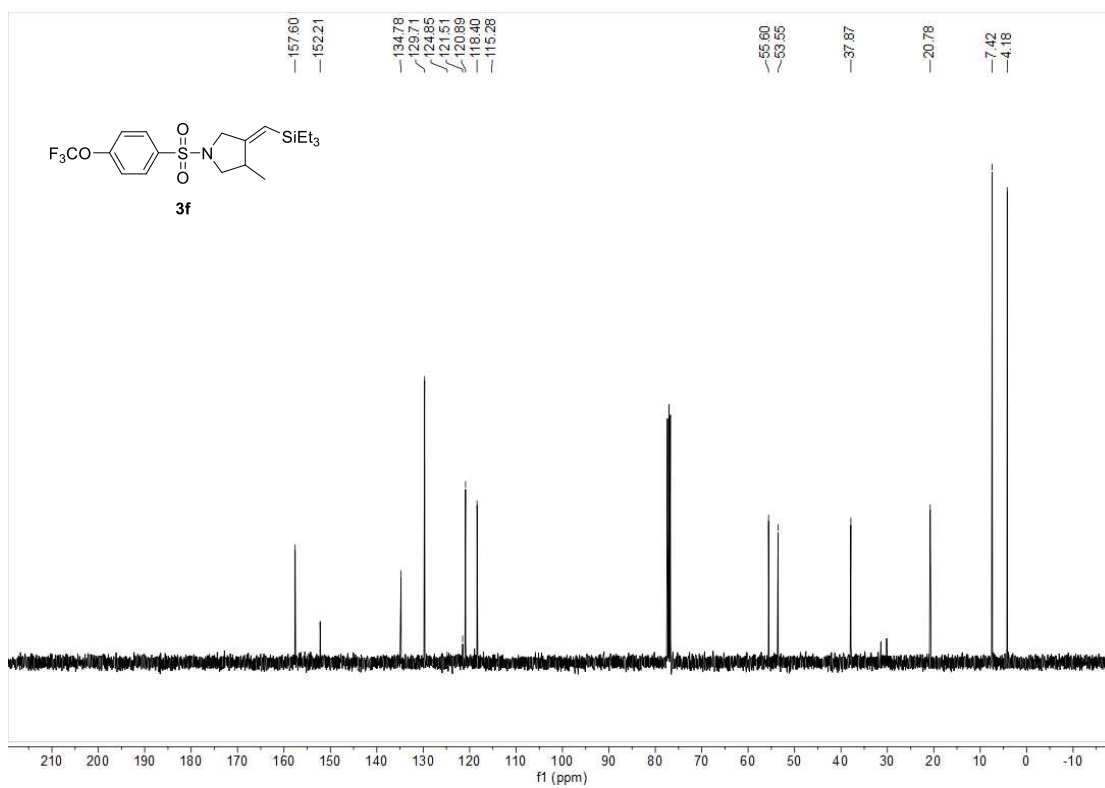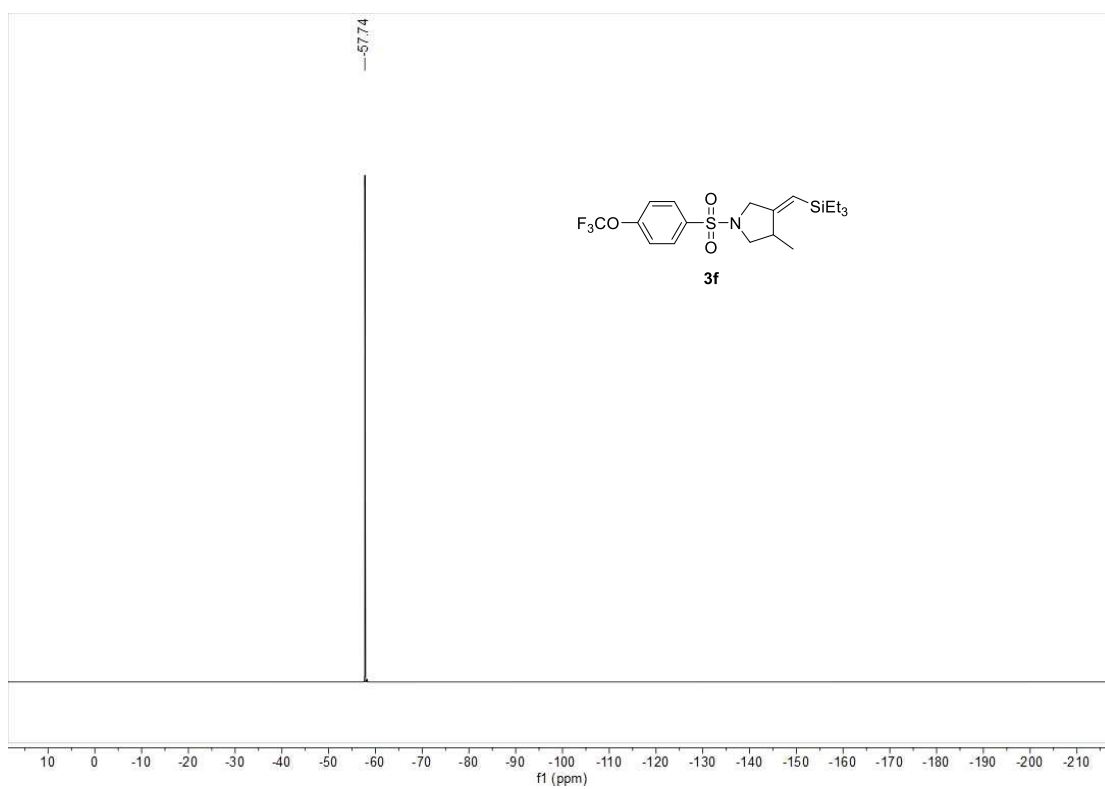

**(E)-3-methyl-1-((4-nitrophenyl)sulfonyl)-4-((triethylsilyl)methylene)pyrrolidine (3g)**

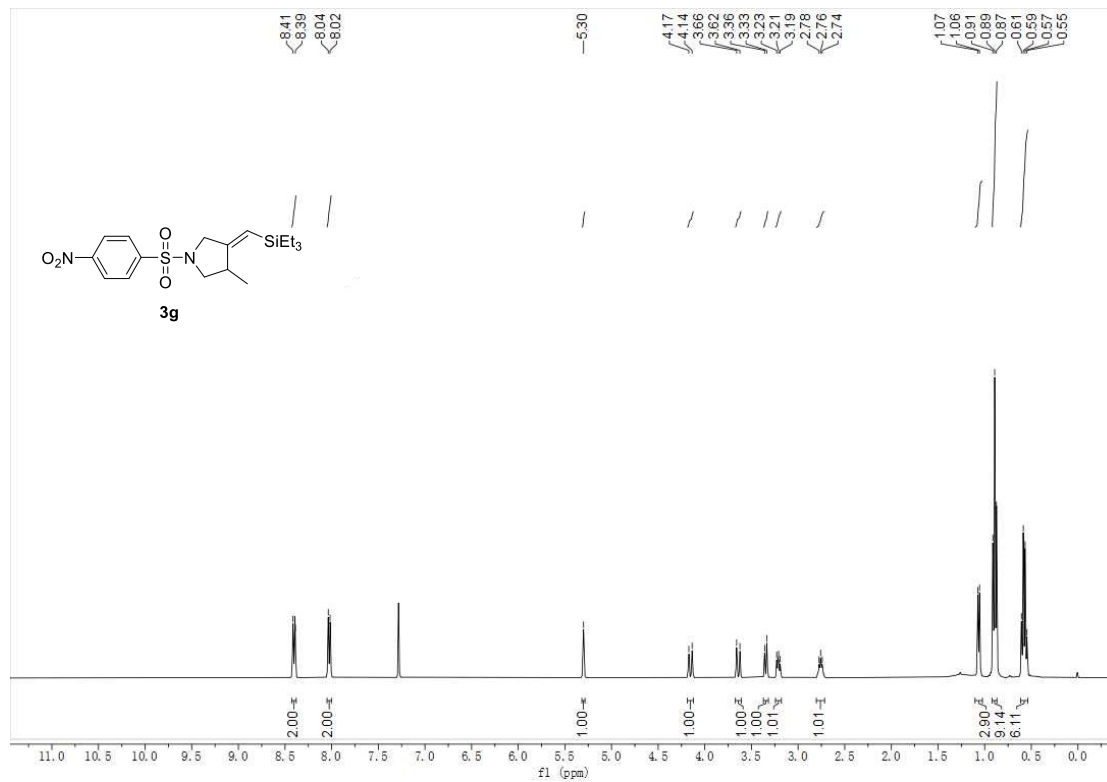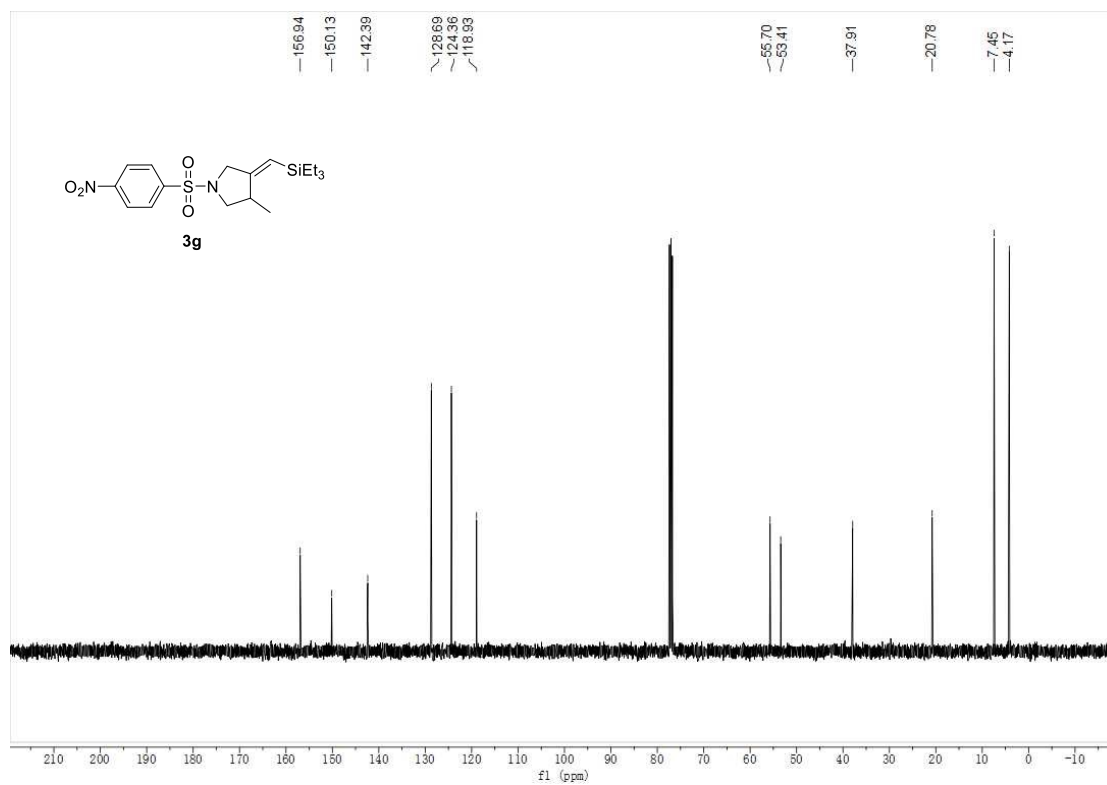

methyl(*E*)-4-((3-methyl-4-((triethylsilyl)methylene)pyrrolidin-1-yl)sulfonyl)benzoate (**3h**)

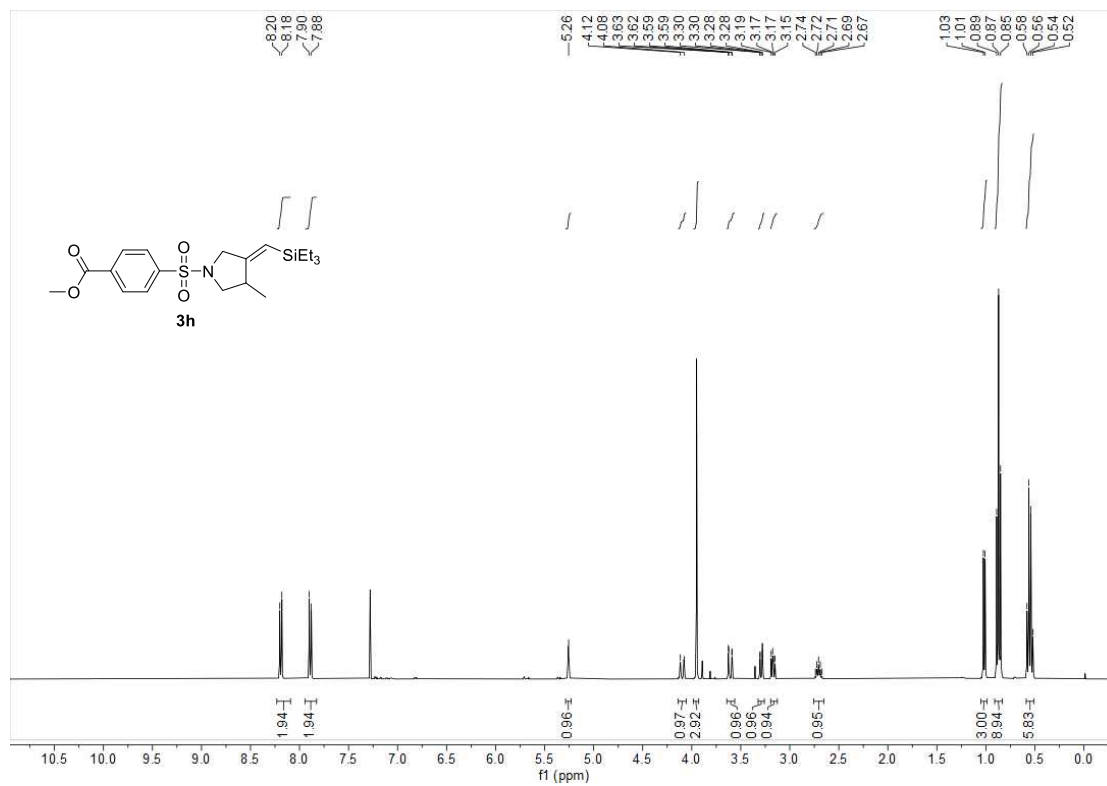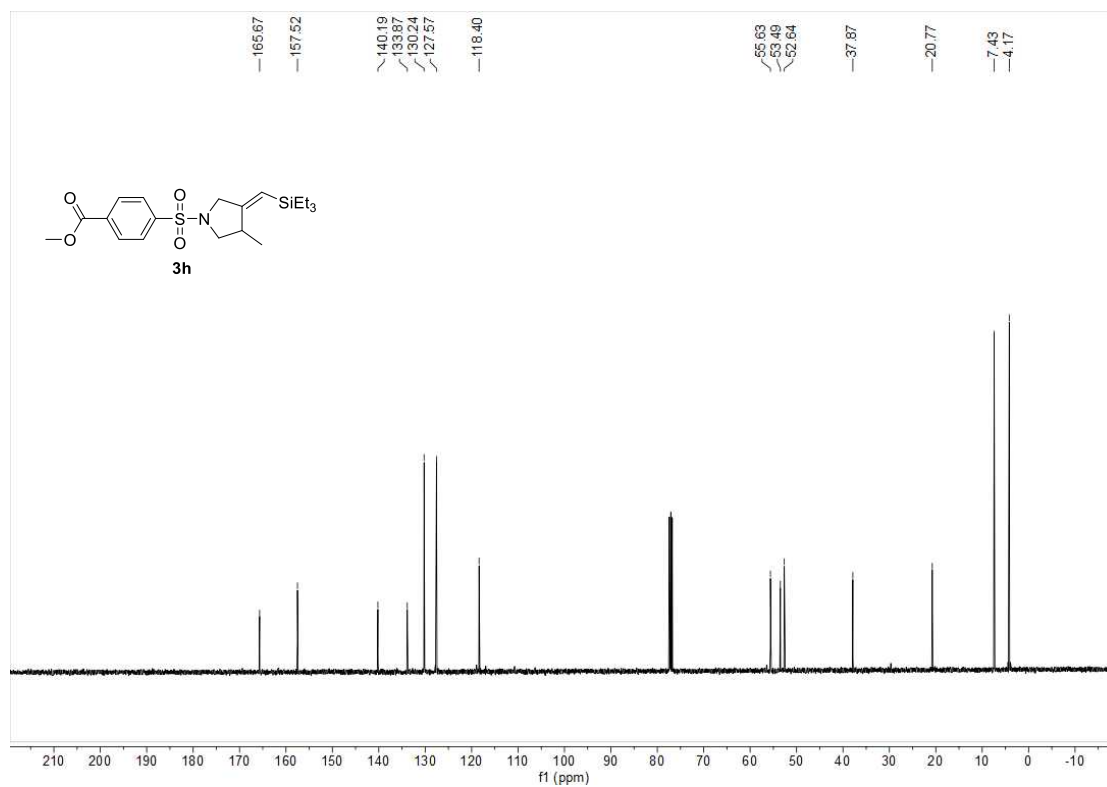

**(E)-3-methyl-4-((triethylsilyl)methylene)-1-((4-(trifluoromethyl)phenyl)sulfonyl)pyrrolidine  
(3i)**

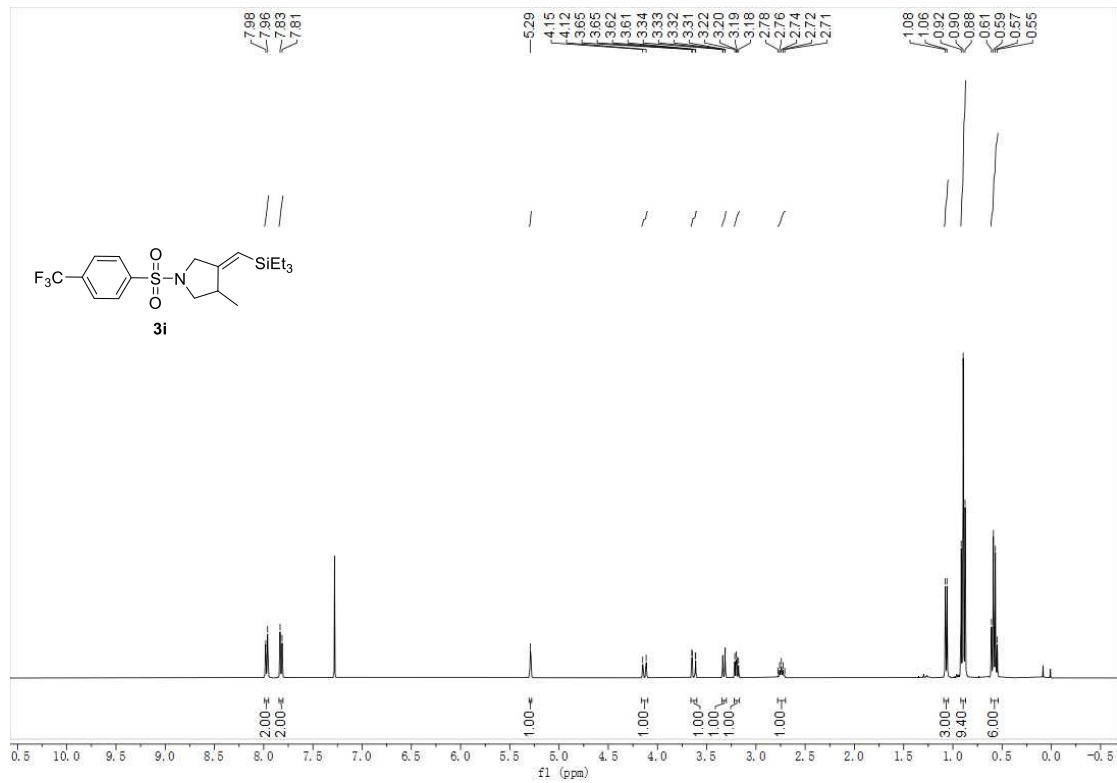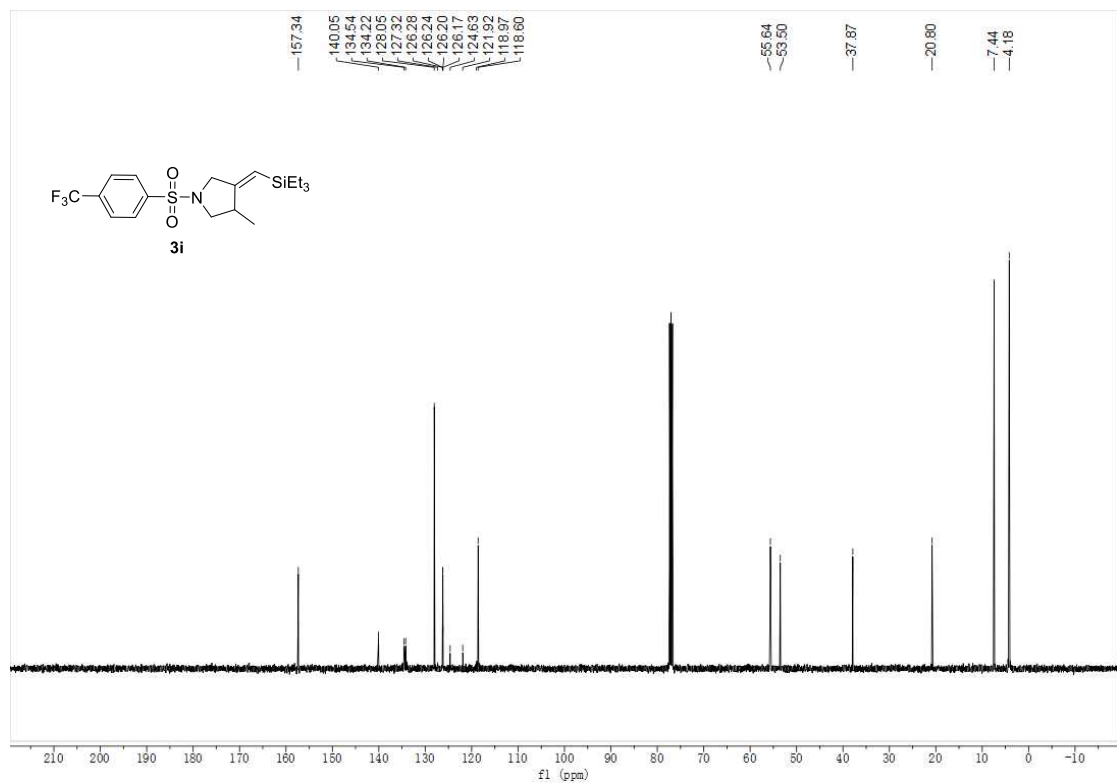

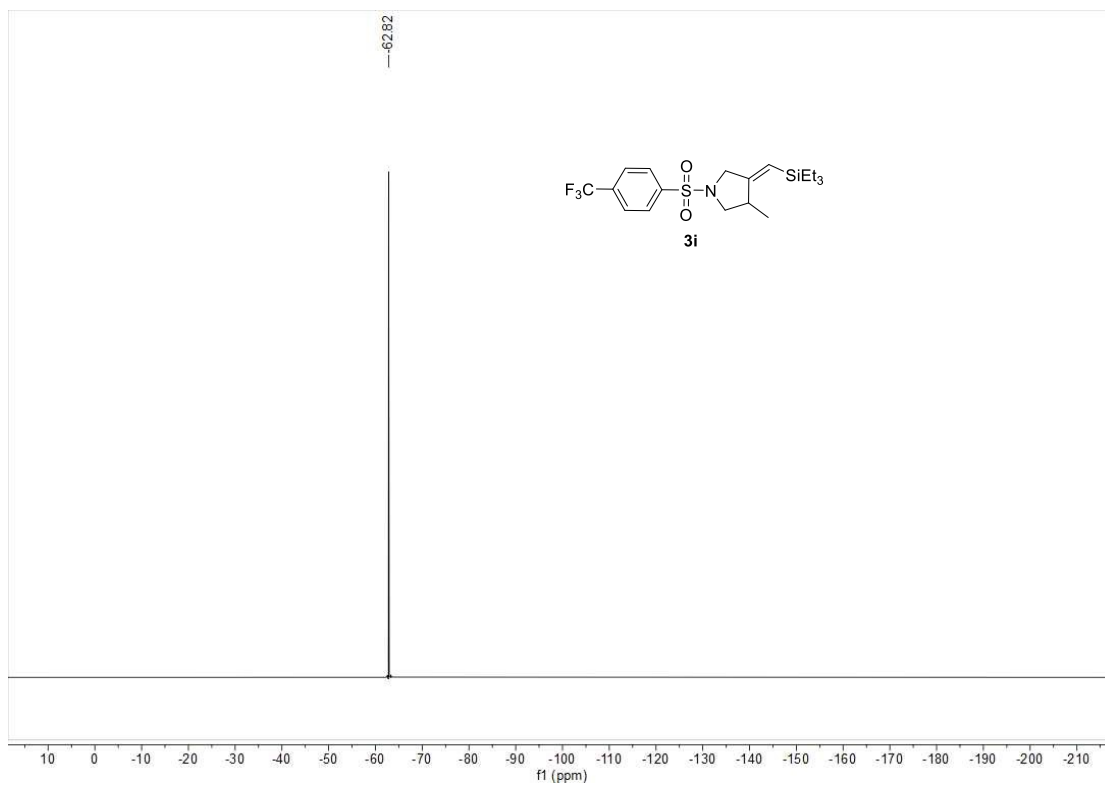

**(E)-3-methyl-1-(m-tolylsulfonyl)-4-((triethylsilyl)methylene)pyrrolidine (**3j**)**

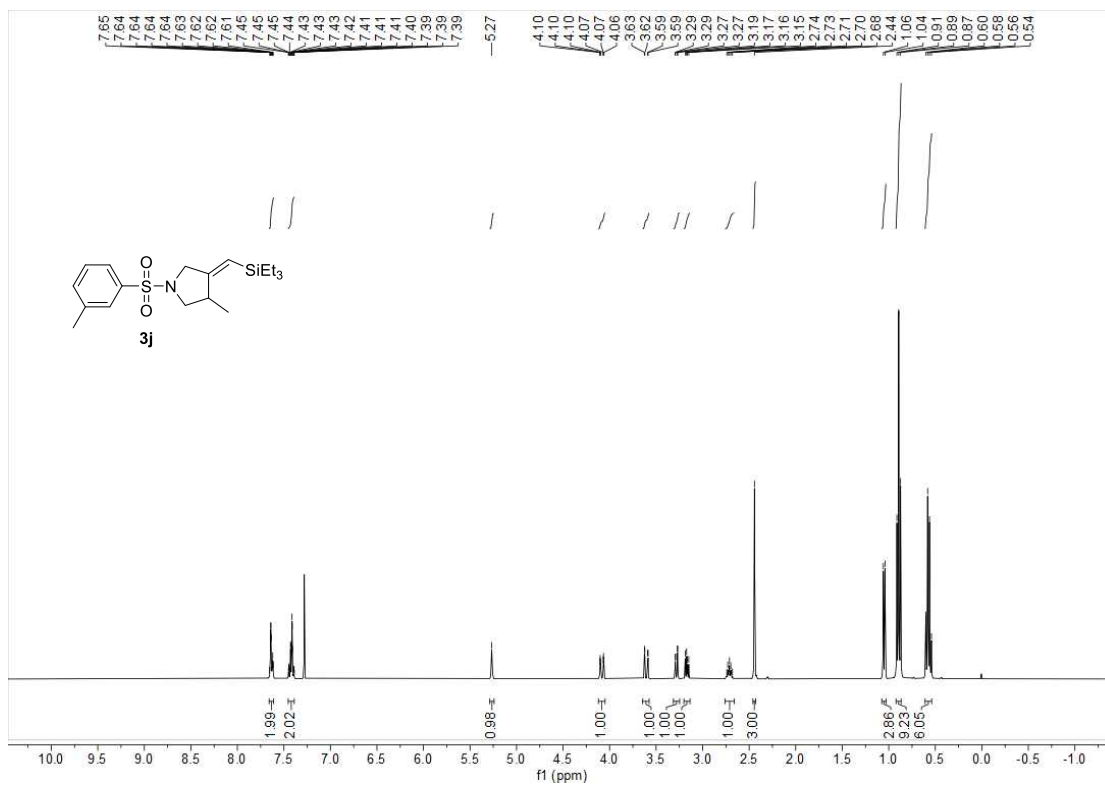

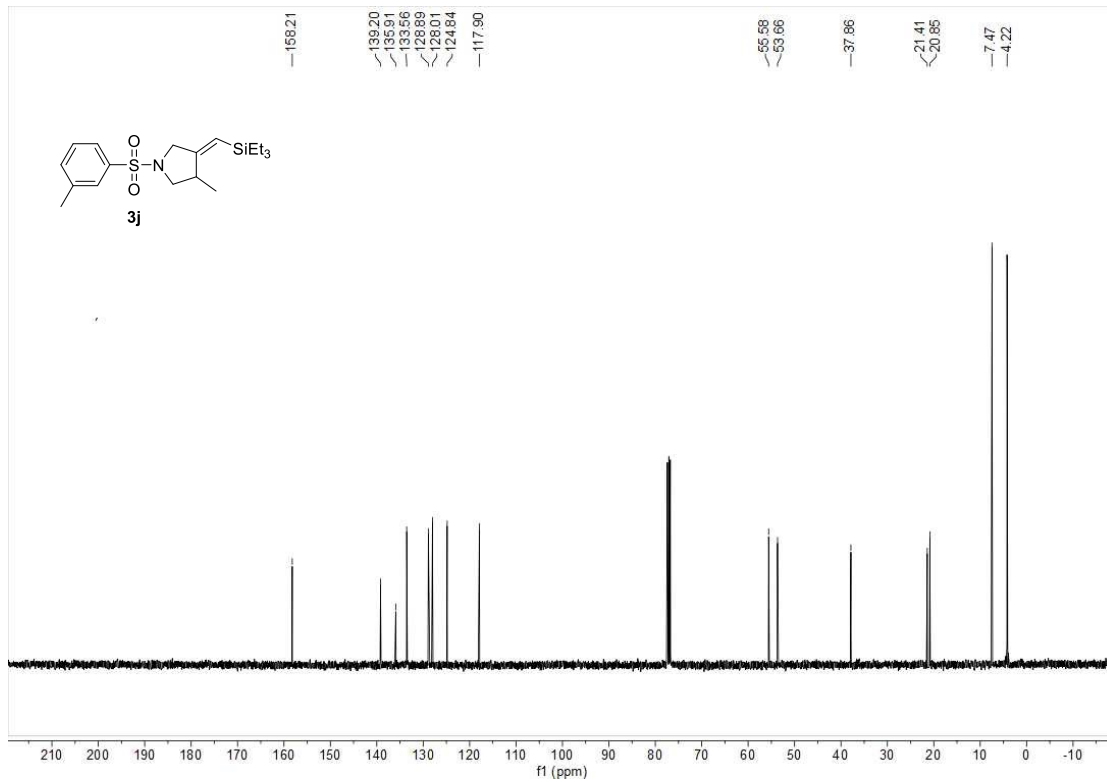

**(E)-1-((3-bromophenyl)sulfonyl)-3-methyl-4-((triethylsilyl)methylene)pyrrolidine (3k)**

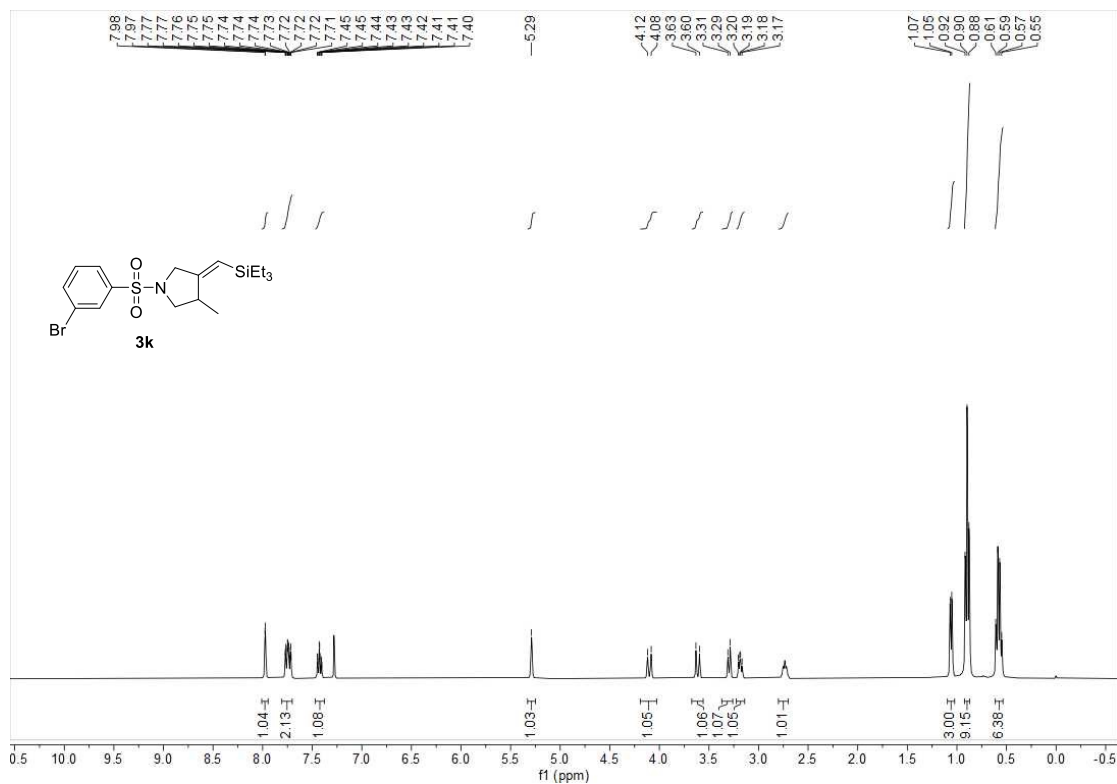

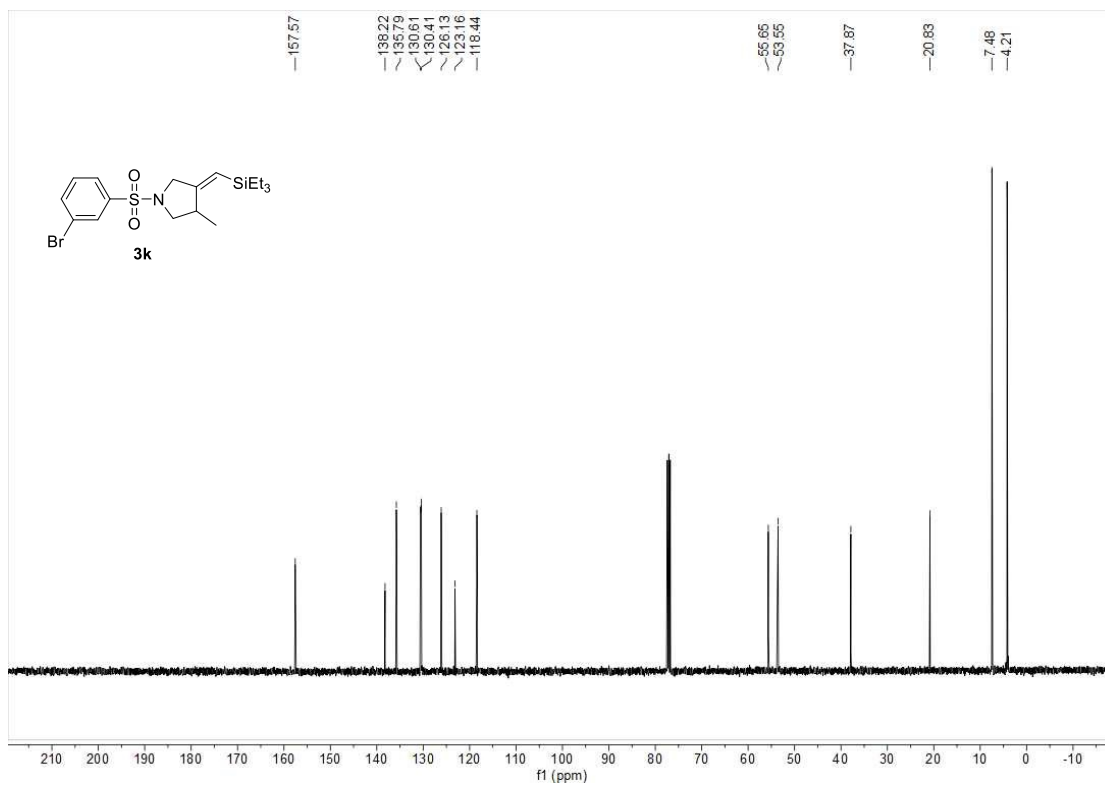

**(E)-1-((3,4-difluorophenyl)sulfonyl)-3-methyl-4-((triethylsilyl)methylene)-3l3-pyrrolidine (3l)**

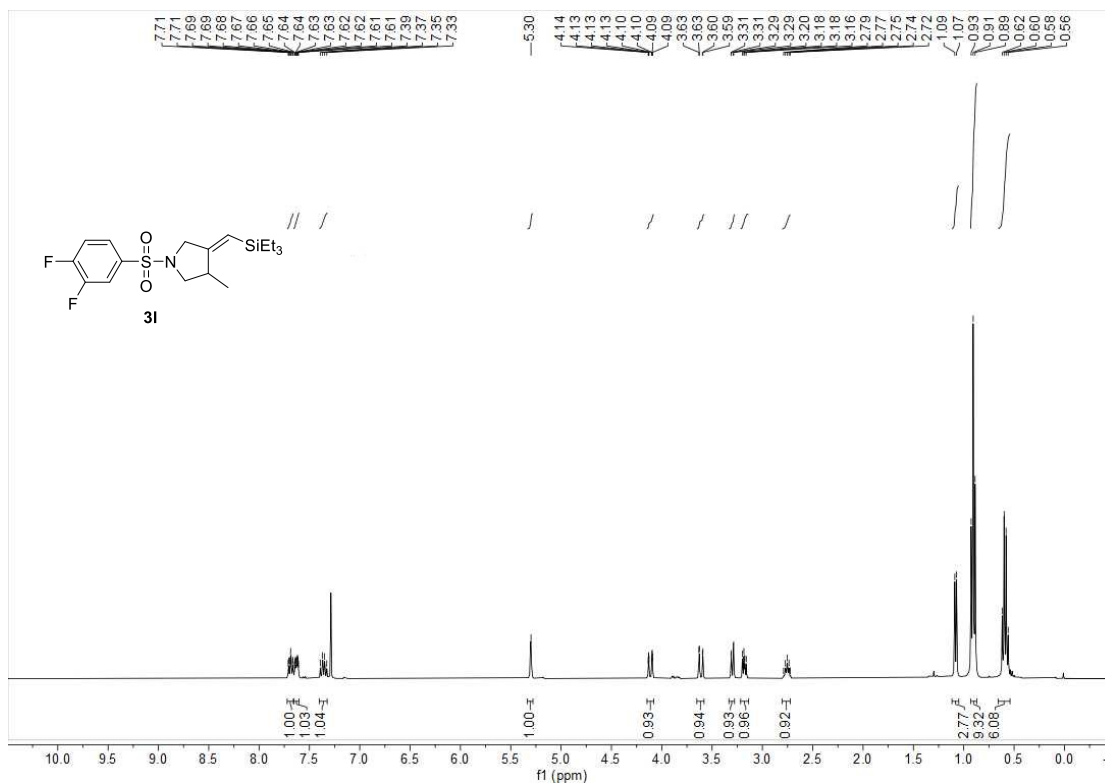

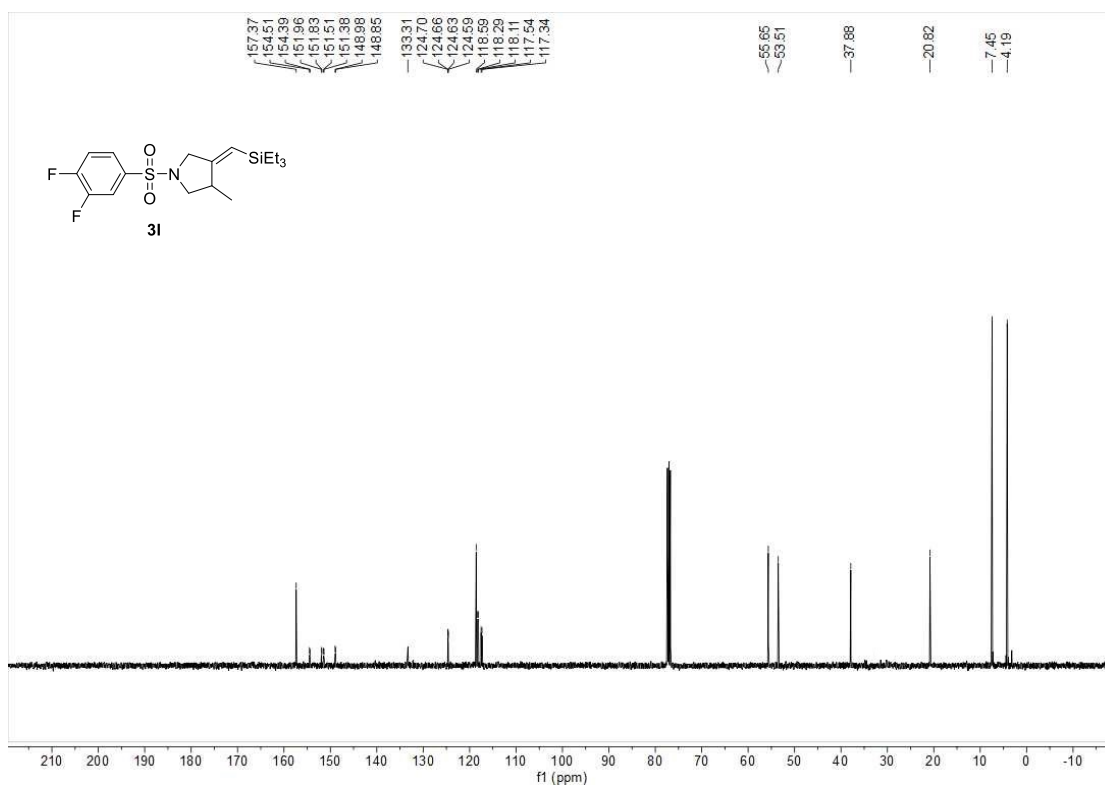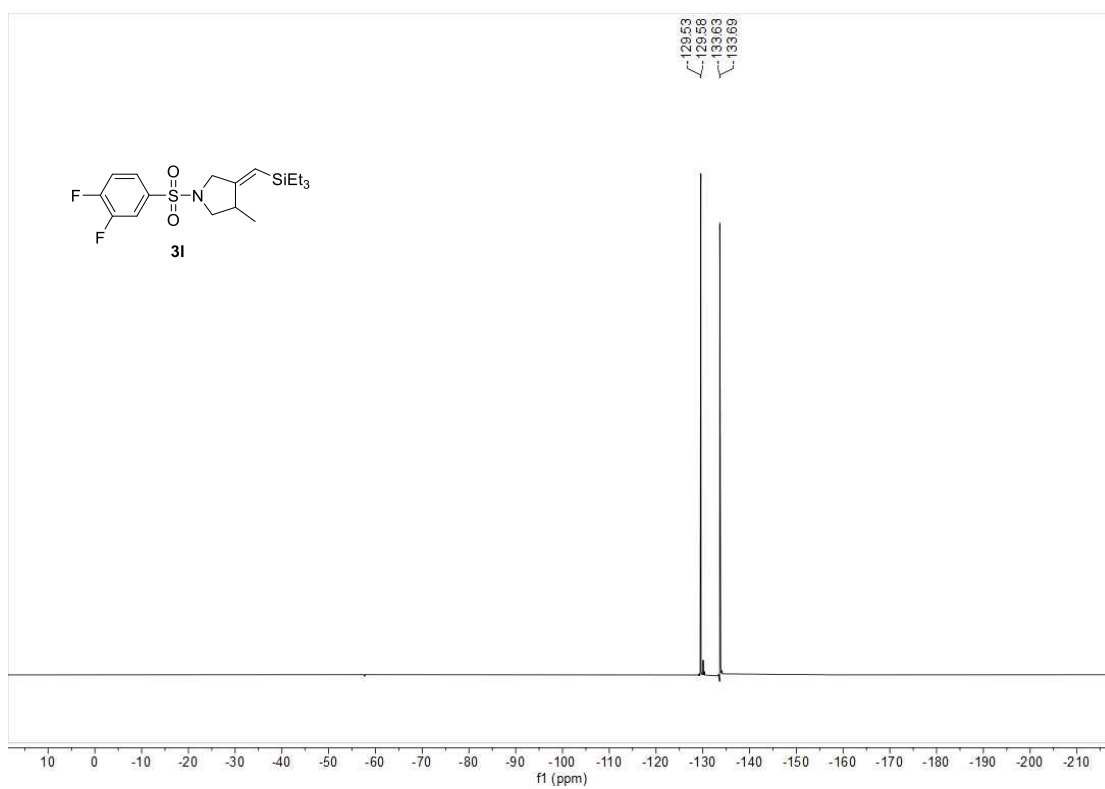



**(E)-1-((3,4-dimethoxyphenyl)sulfonyl)-3-methyl-4-((triethylsilyl)methylene)pyrrolidine (3m)**

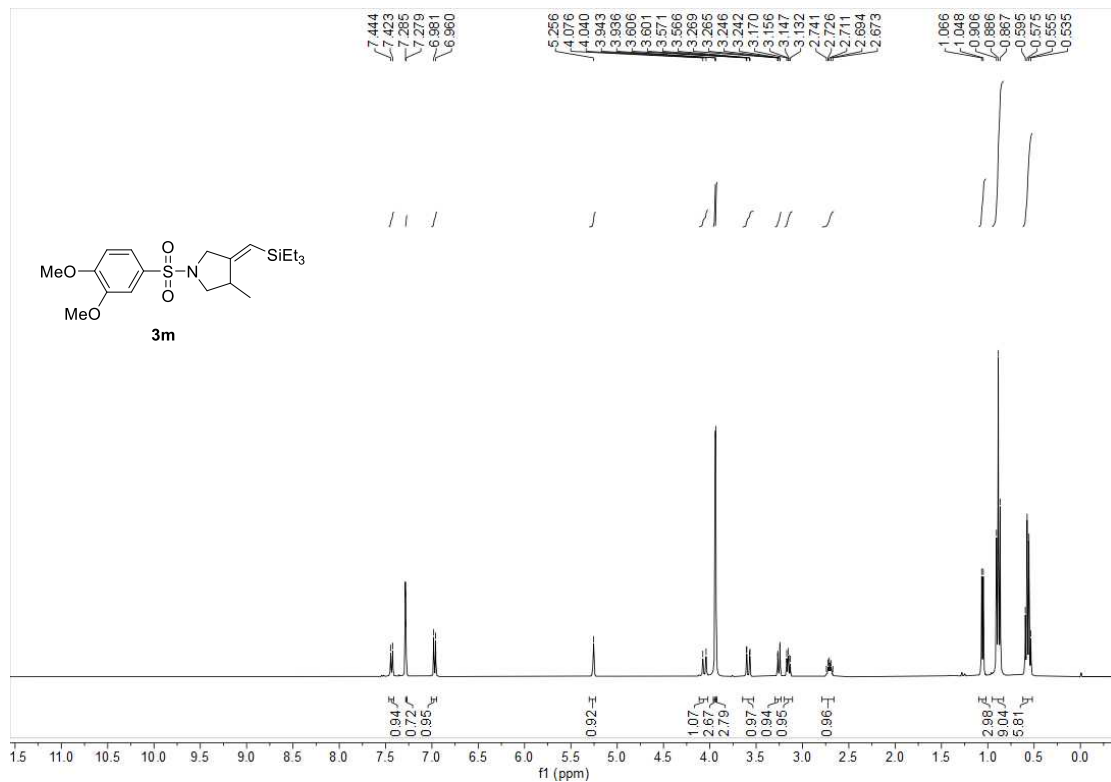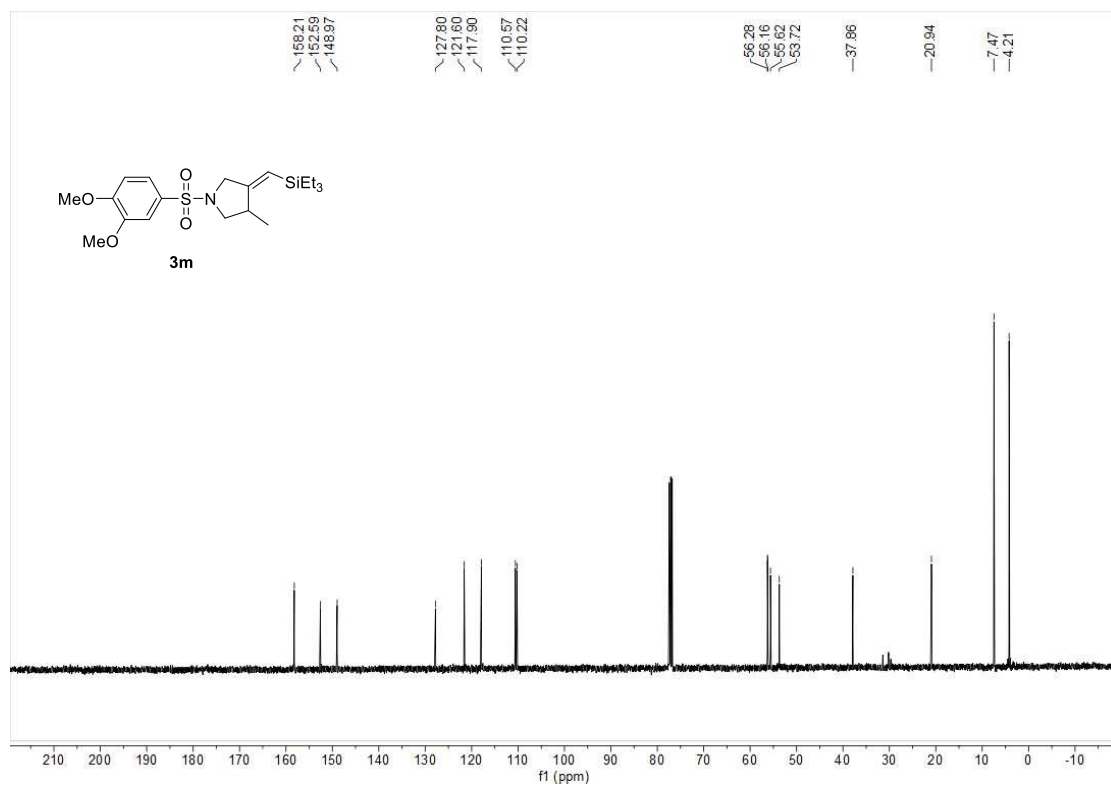

**(E)-3-methyl-1-(naphthalen-2-ylsulfonyl)-4-((triethylsilyl)methylene)pyrrolidine (3n)**

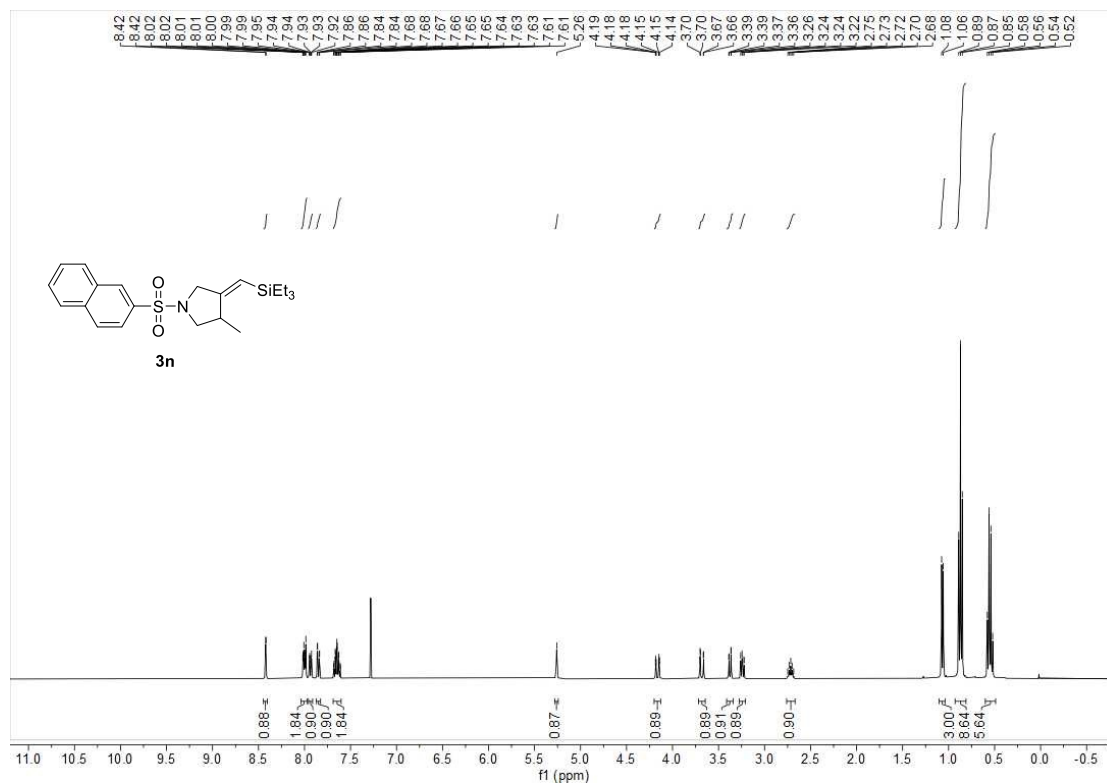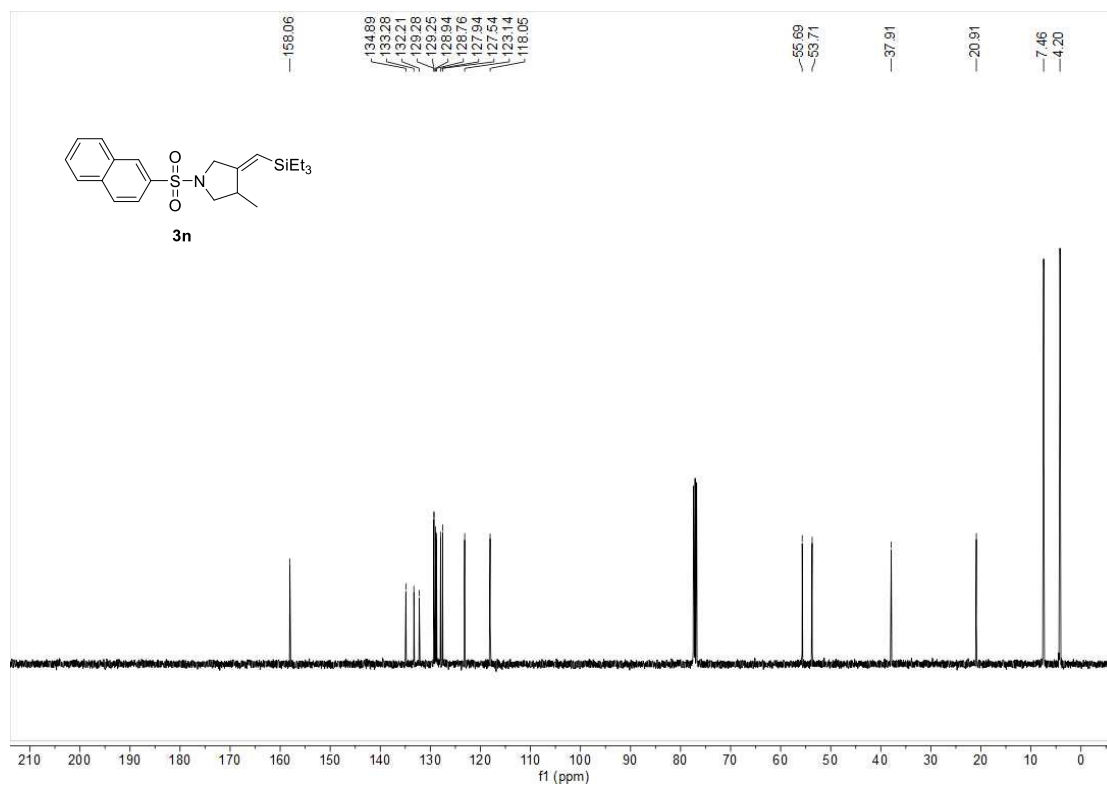

**(E)-N,N-dimethyl-6-((3-methyl-4-((triethylsilyl)methylene)pyrrolidin-1-yl)sulfonyl)naphthalen-2-amine (3o)**

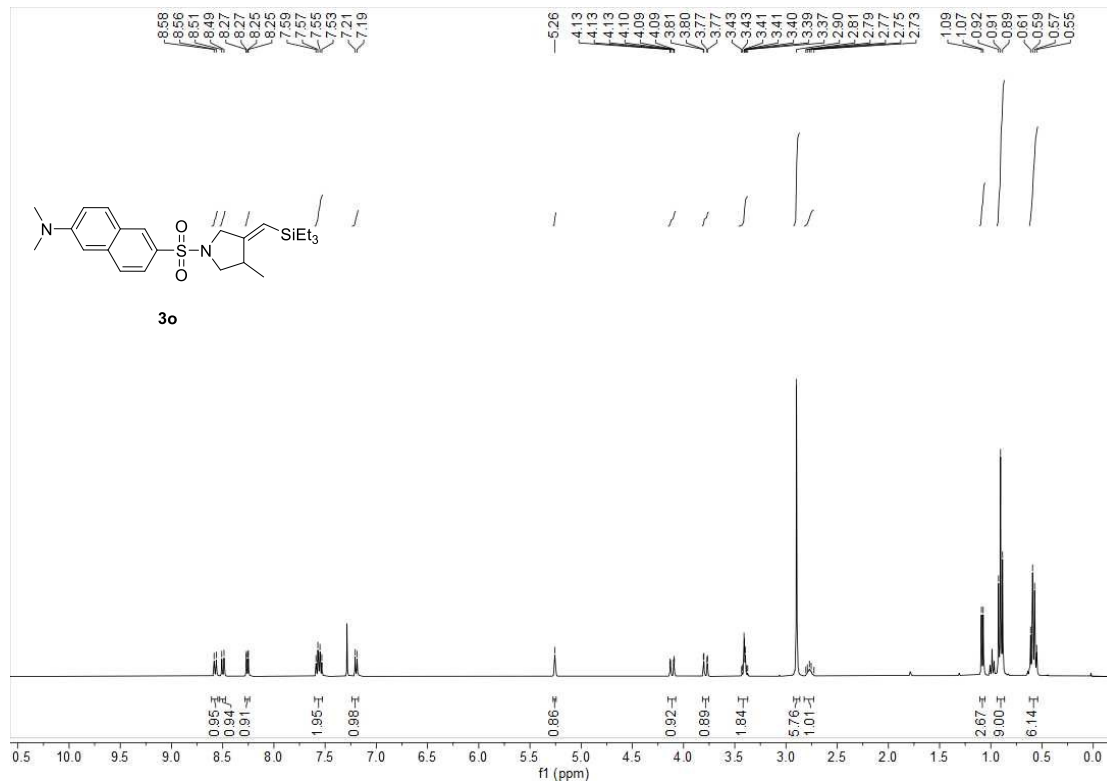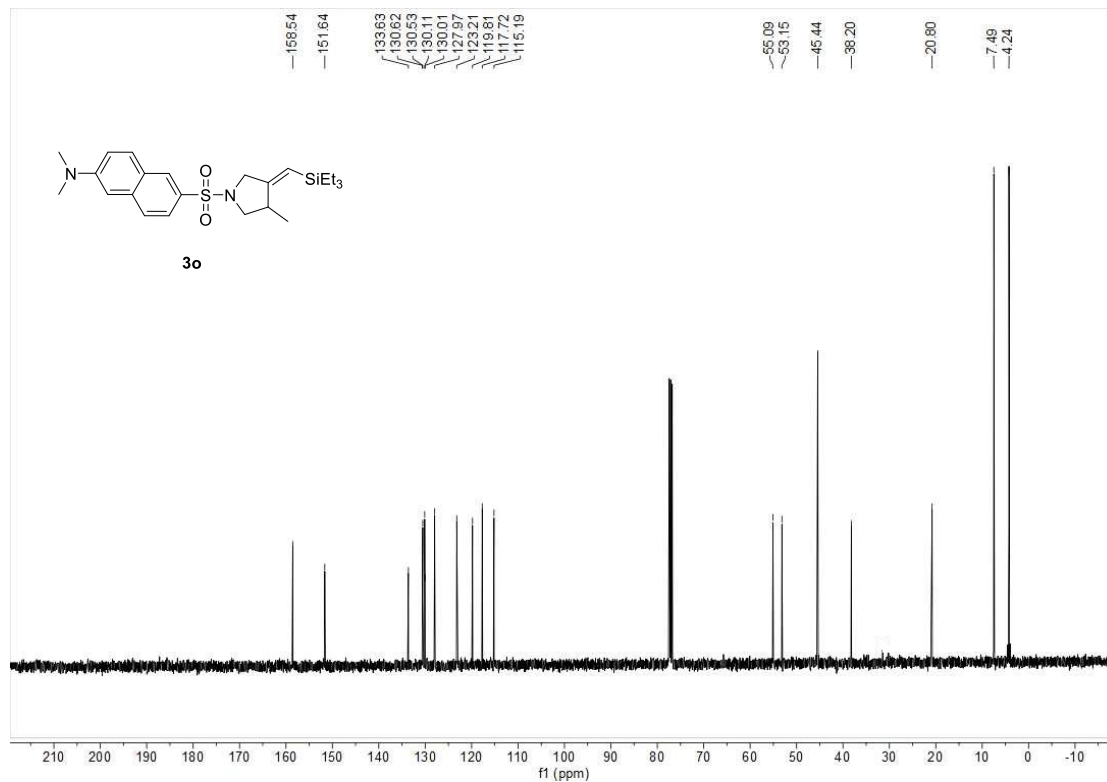

**(E)-3-methyl-1-(thiophen-2-ylsulfonyl)-4-((triethylsilyl)methylene)pyrrolidine (3p)**

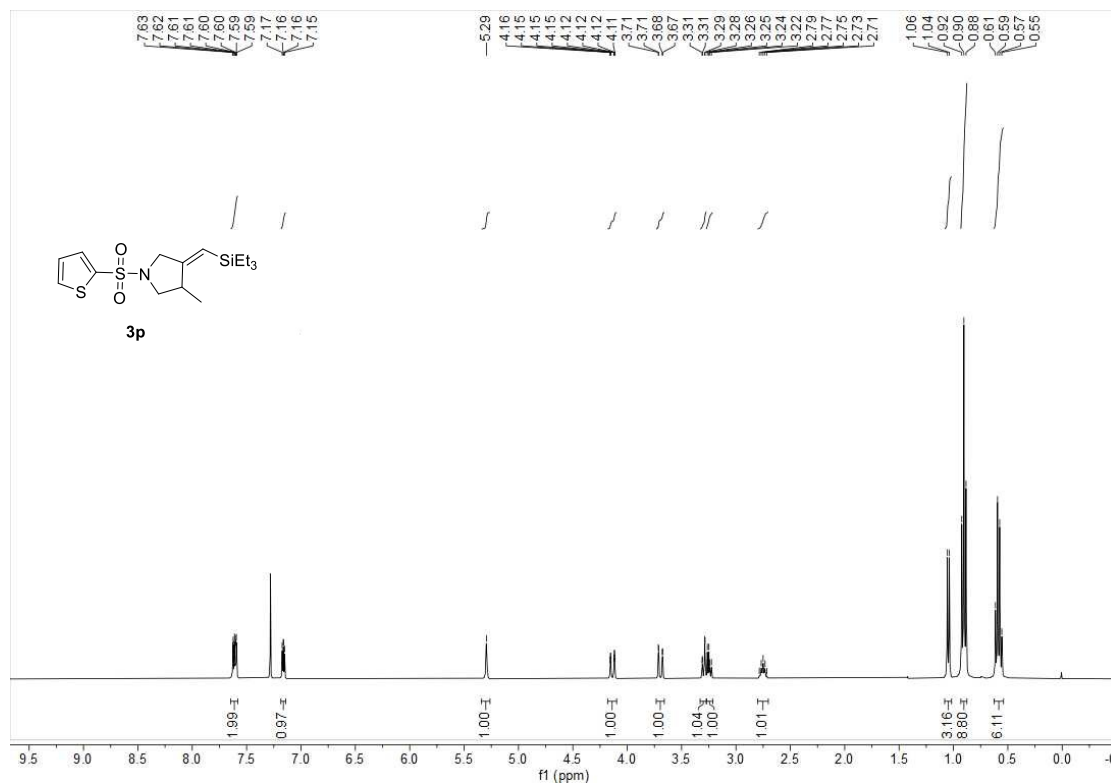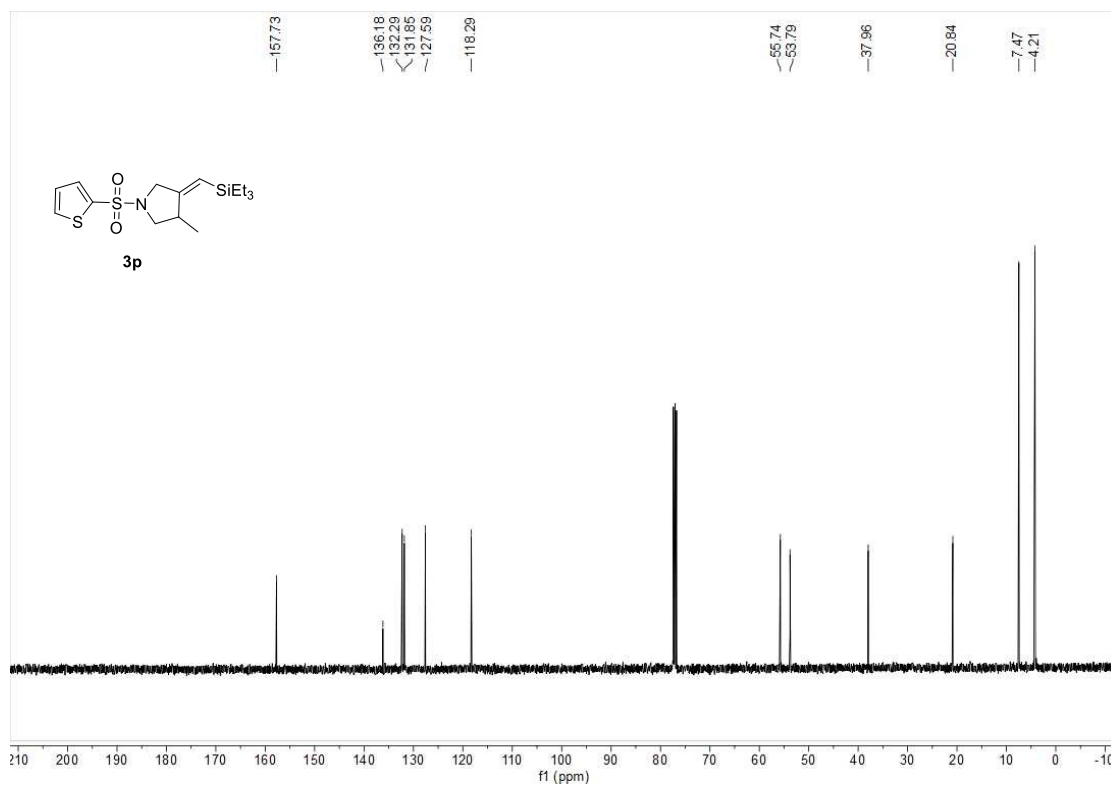

**(E)-3-((3-methyl-4-((triethylsilyl)methylene)pyrrolidin-1-yl)sulfonyl)pyridine (3q)**

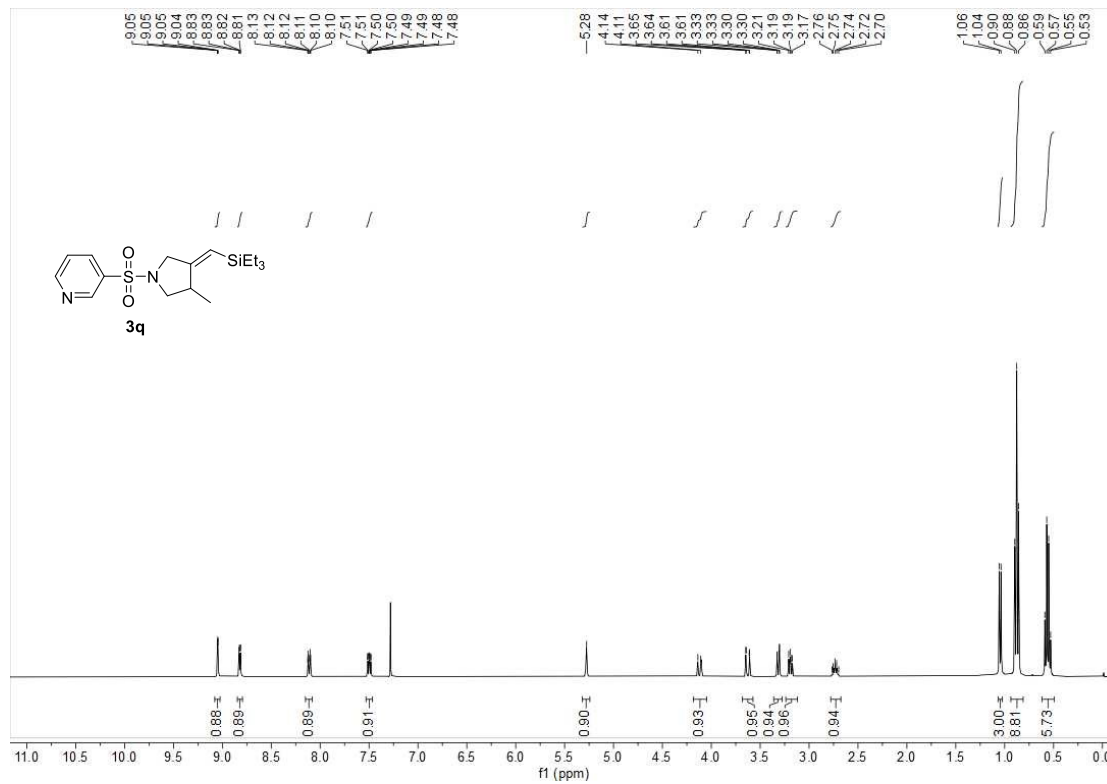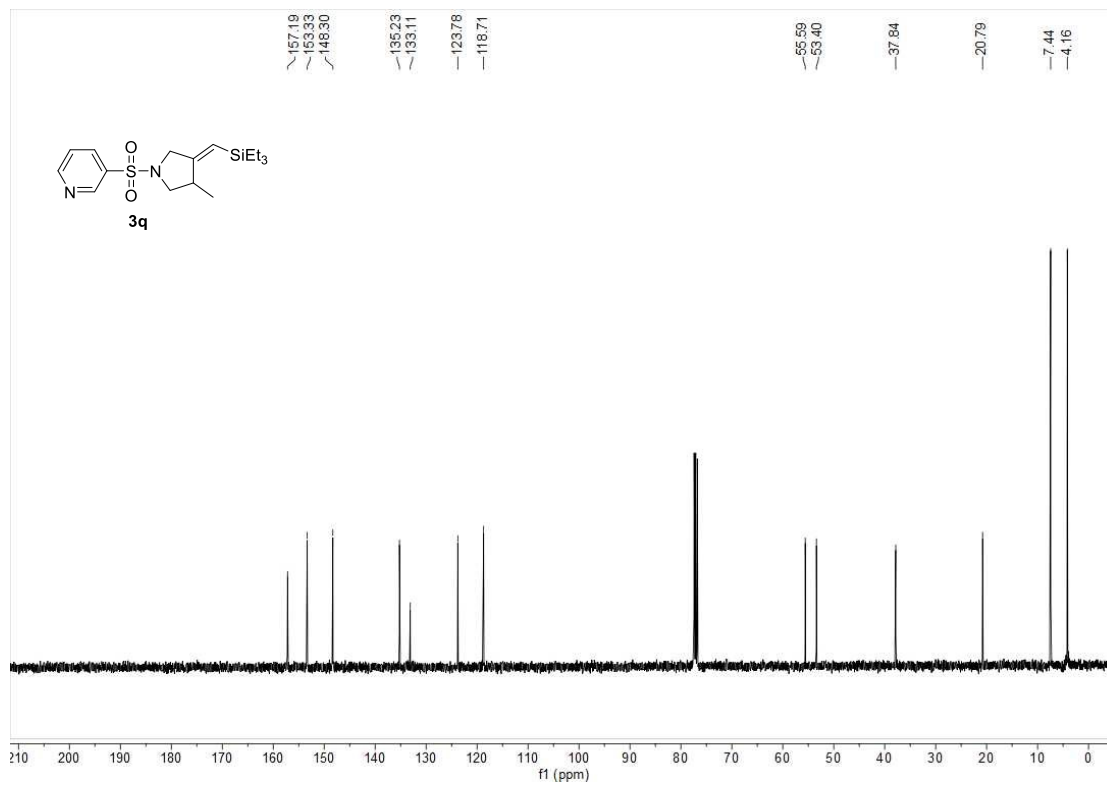

**(E)-3-methyl-1-(methylsulfonyl)-4-((triethylsilyl)methylene)pyrrolidine (3r)**

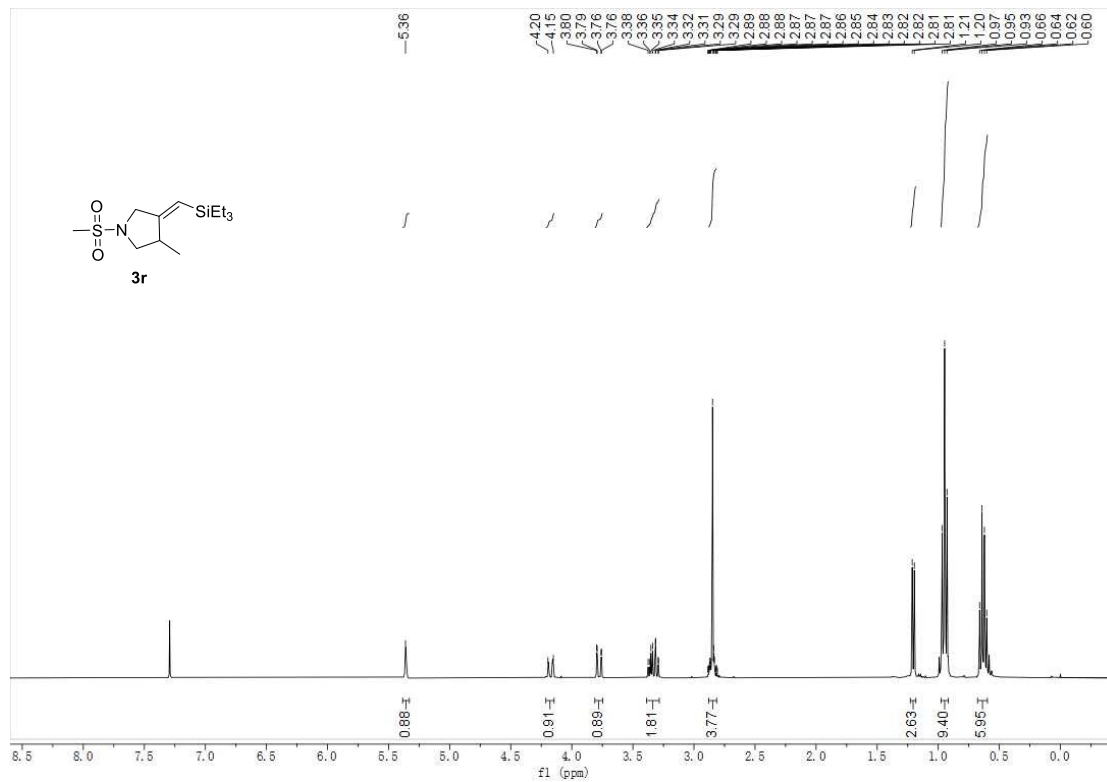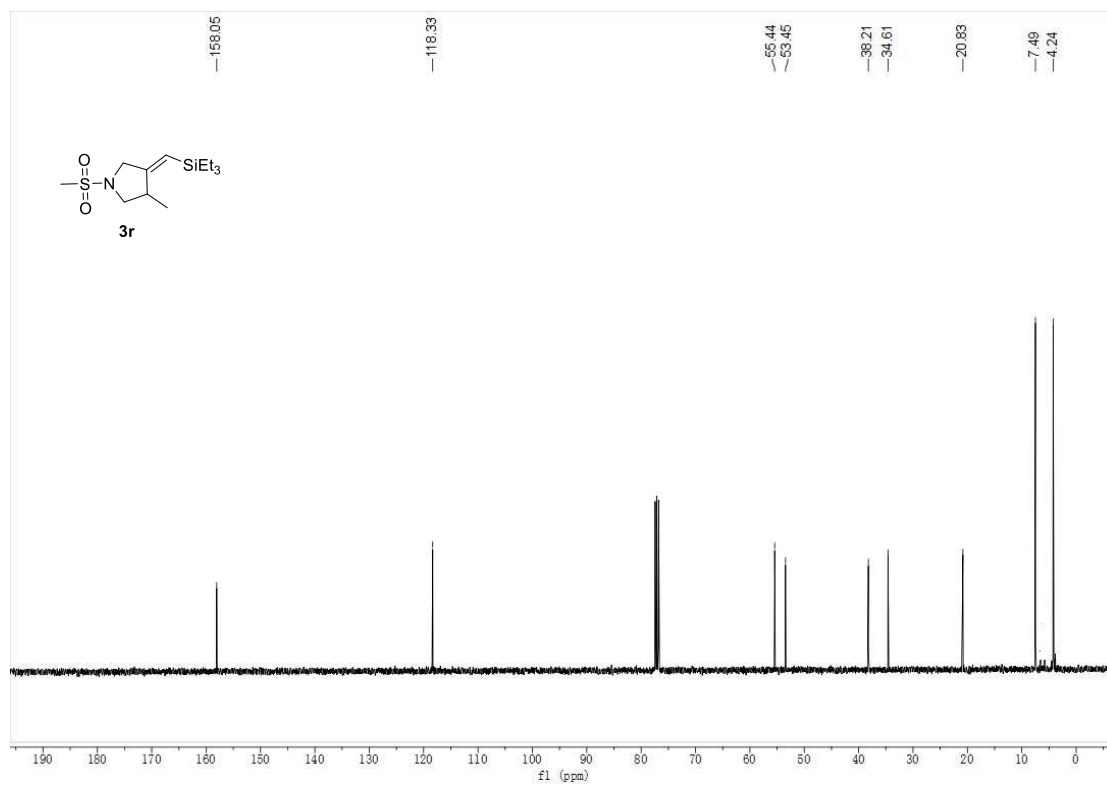

**(E)-1-(ethylsulfonyl)-3-methyl-4-((triethylsilyl)methylene)pyrrolidine (3s)**

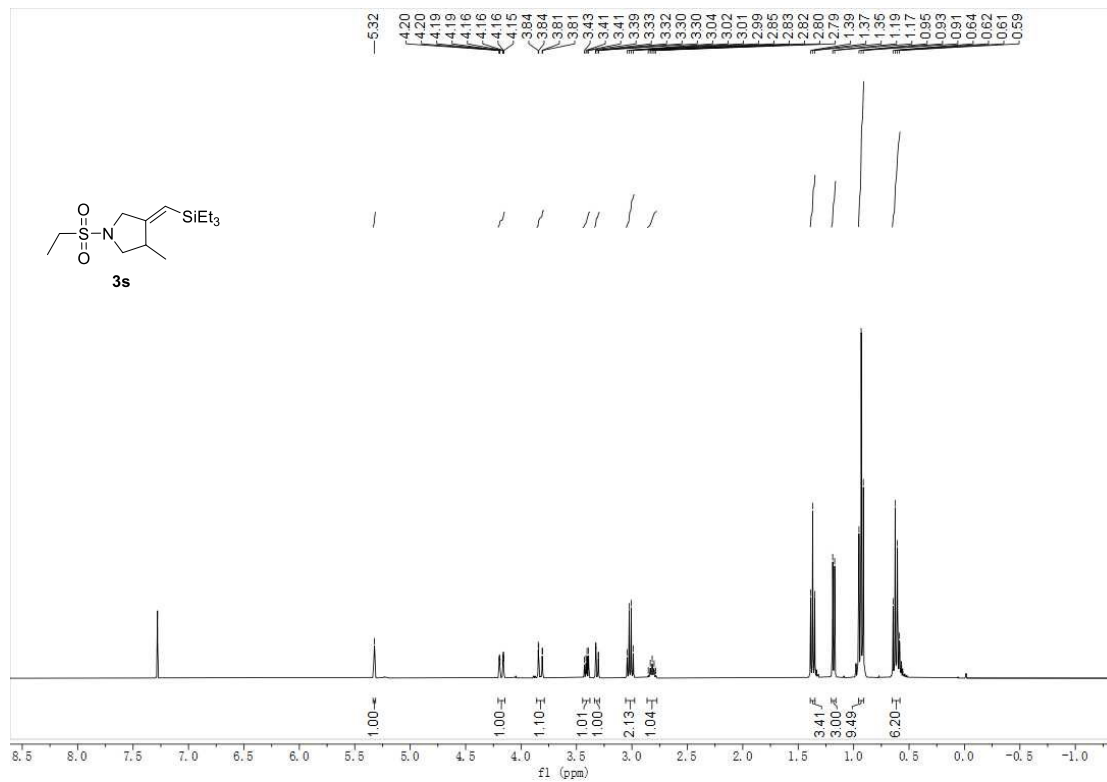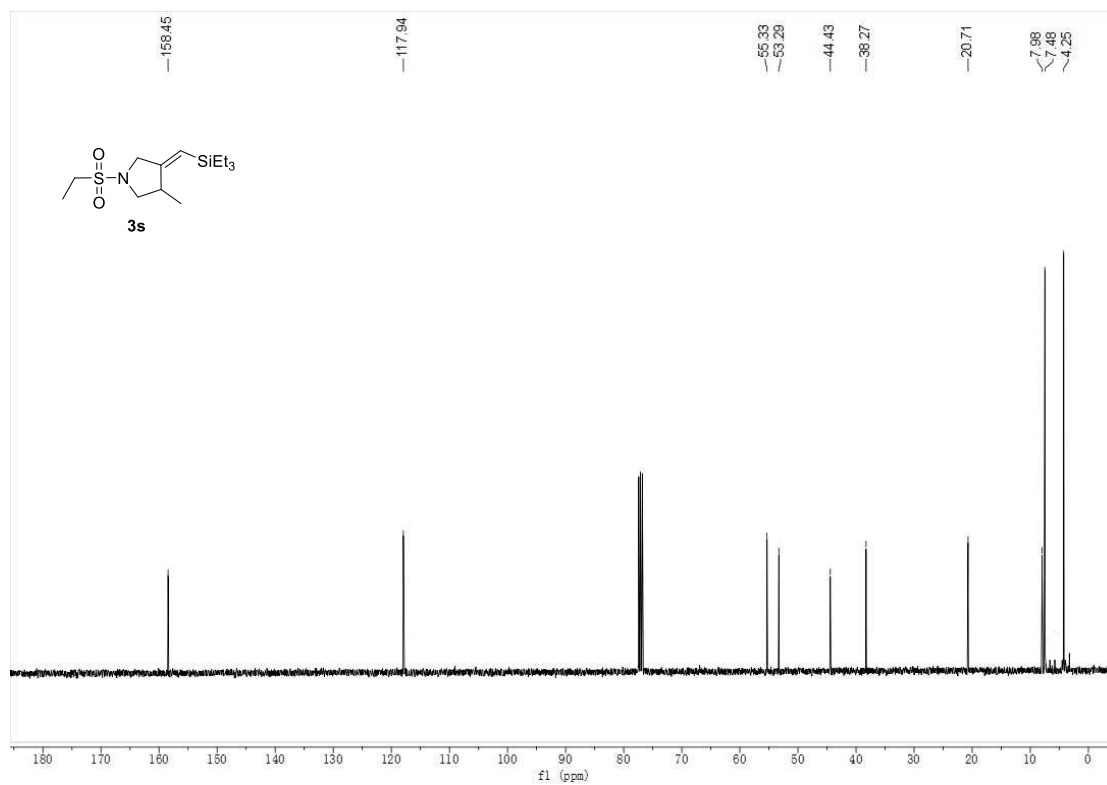

1-(4-Toluenesulfonyl)-3-(*E*)-(1-(triethoxysilyl)ethylidene)-4-methylpyrrolidine (**3t**)

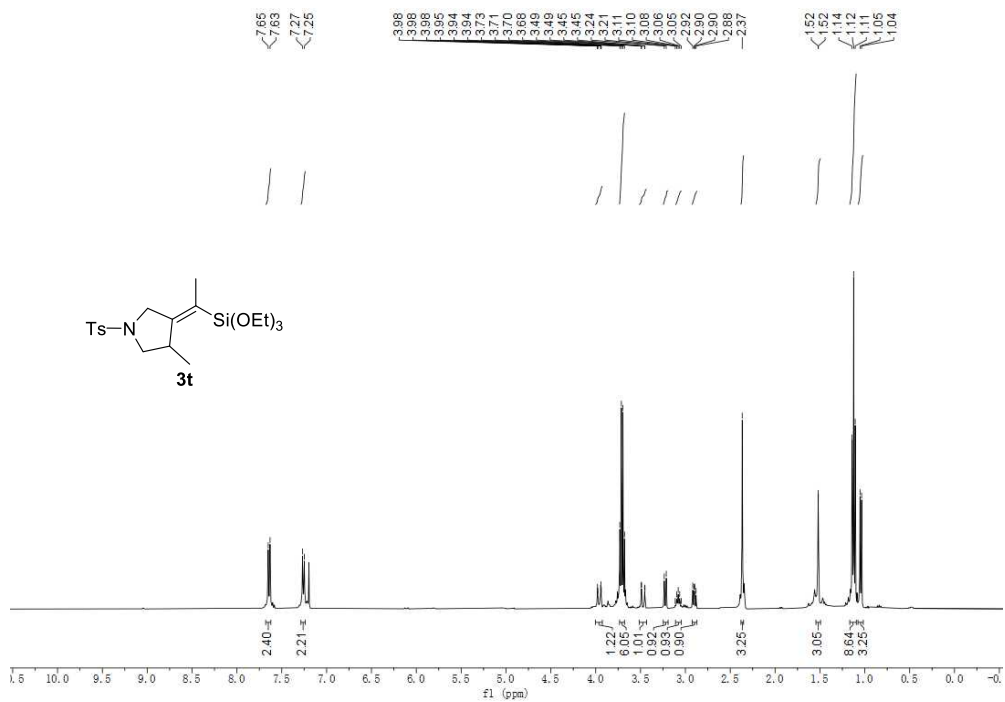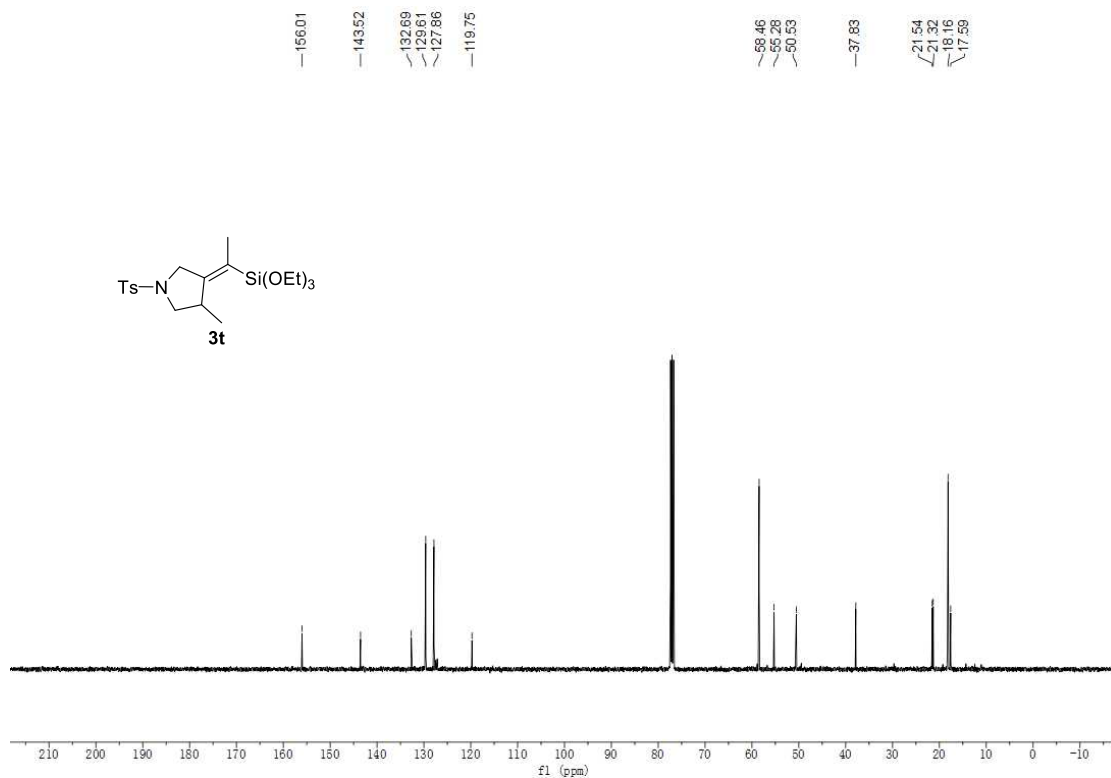



4,4-Bis(methoxycarbonyl)-1-(Z)-(triethylsilyl)methylidene-2-methylcyclopentane (3u)

5.21  
5.21  
5.20  
5.20  
5.20  
4.16  
4.15  
4.14  
4.14  
4.14  
4.13  
4.12  
4.12  
4.11  
4.11  
4.10  
4.09  
4.09  
4.08  
4.08  
4.07  
4.07  
4.06  
4.06  
3.96  
3.92  
3.21  
3.21  
3.18  
3.18  
3.17  
3.17  
2.72  
2.72  
2.68  
2.68  
2.68  
2.64  
2.64  
2.63  
2.63  
2.62  
2.62  
2.62  
2.61  
2.60  
2.58  
2.58  
2.58  
1.88  
1.88  
1.82  
1.82  
1.81  
1.81  
1.80  
1.78  
1.20  
1.18  
1.17  
1.17  
1.16  
1.15  
1.15  
1.13  
1.13  
1.02  
1.00  
1.00  
0.87  
0.85  
0.85  
0.55  
0.53  
0.51  
0.49

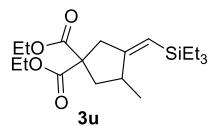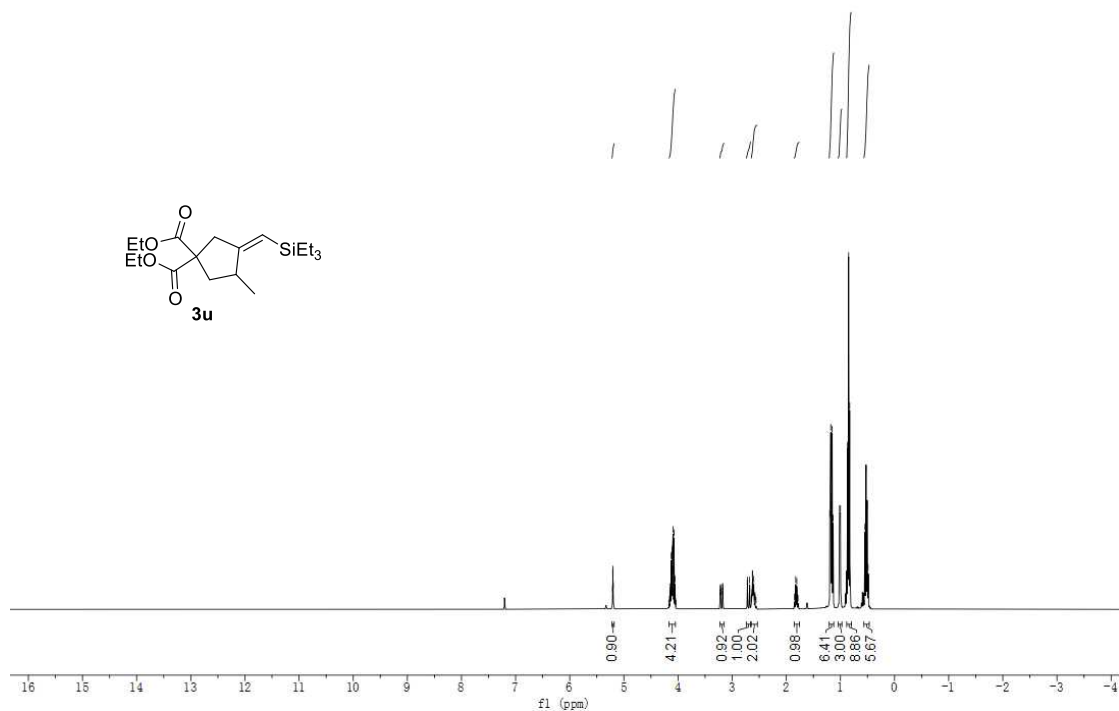

172.22  
171.78  
163.73  
-117.34  
61.42  
61.34  
58.51  
44.58  
41.91  
38.95  
-22.57  
-14.02  
-7.51  
-4.39

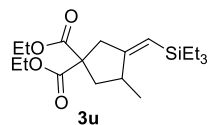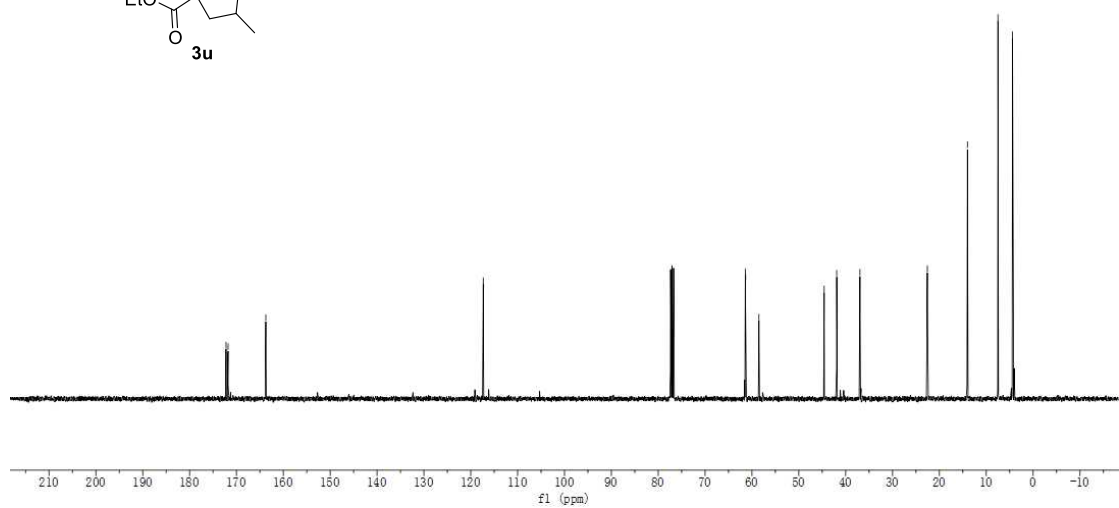

**(E)-3-methyl-1-tosyl-4-((tripropylsilyl)methylene)pyrrolidine (3v)**

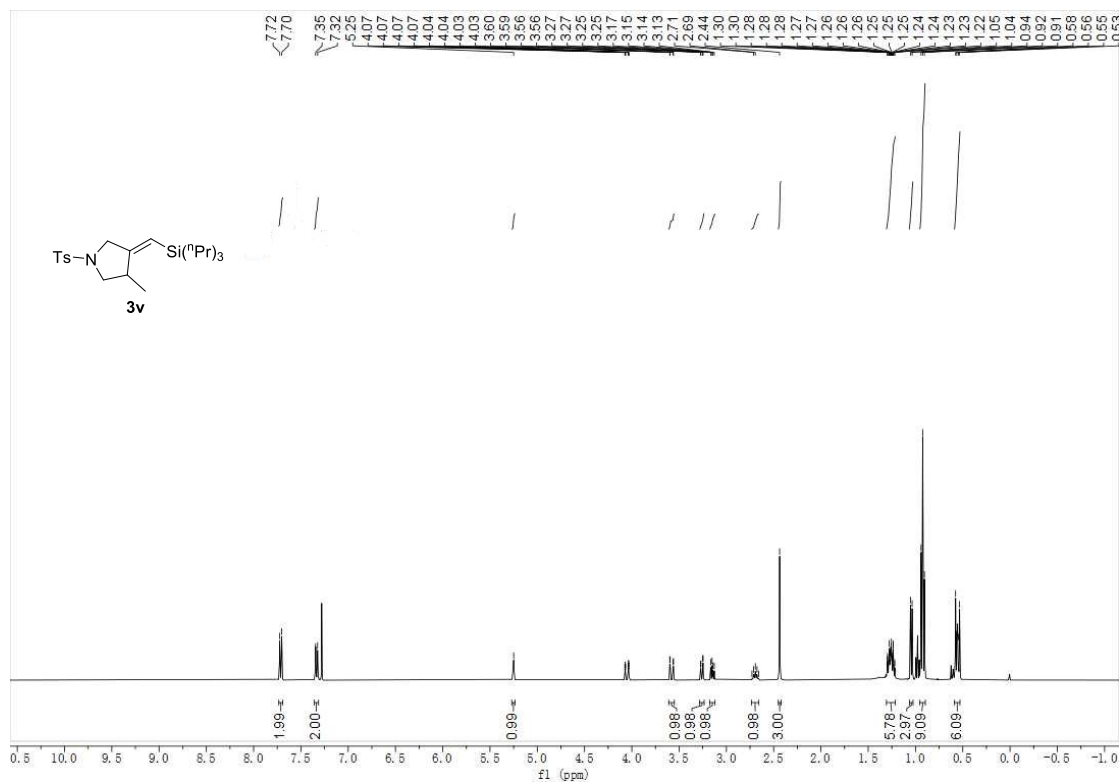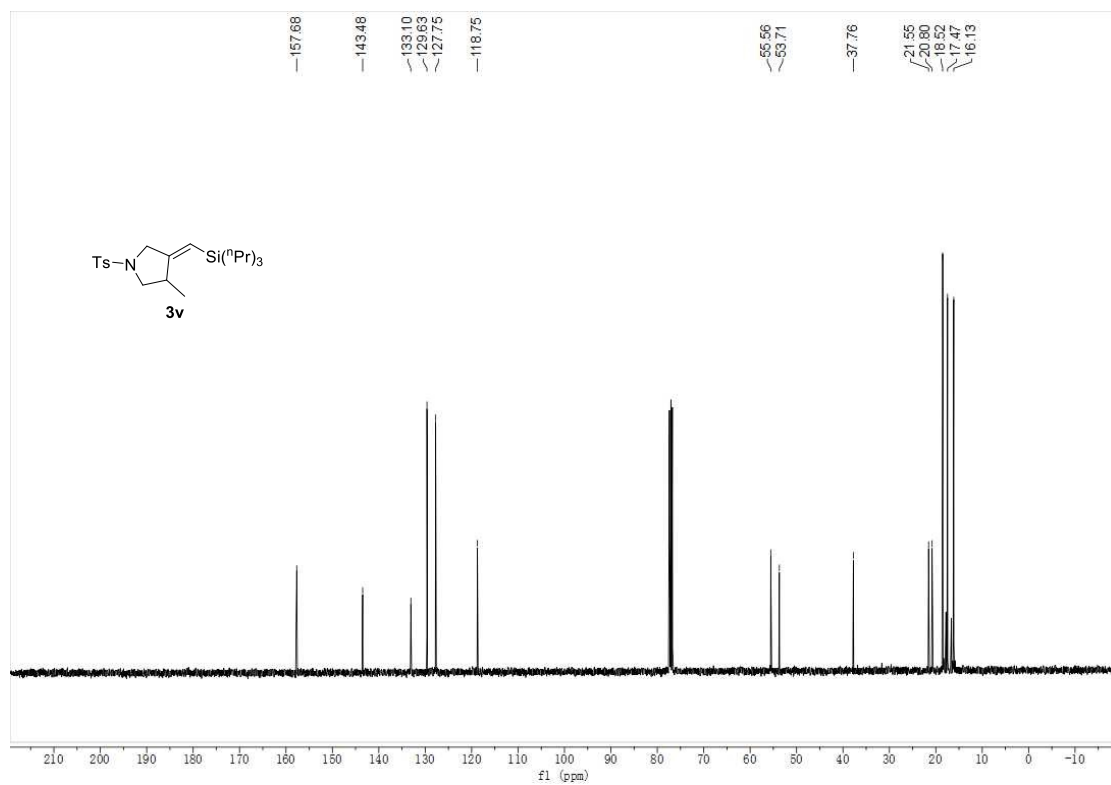

**(E)-3-methyl-1-tosyl-4-((tributylsilyl)methylene)pyrrolidine (3w)**

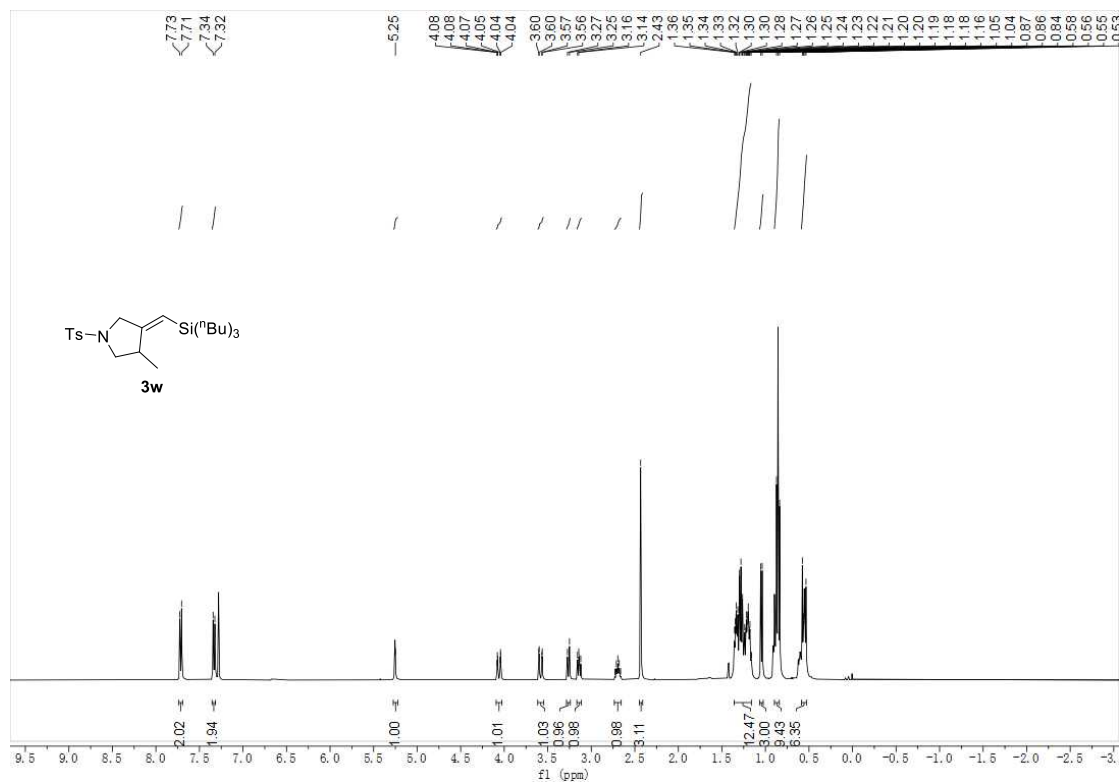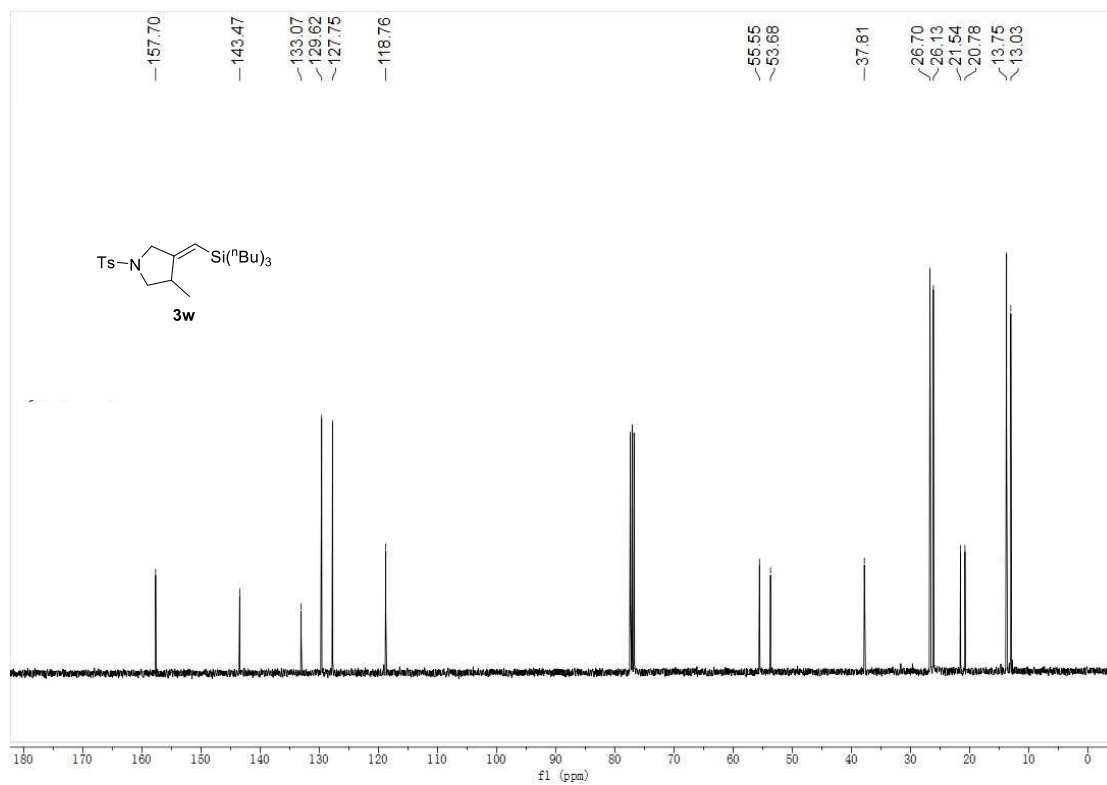

**(E)-3-methyl-1-tosyl-4-((triHexsilyl)methylene)pyrrolidine (3x)**

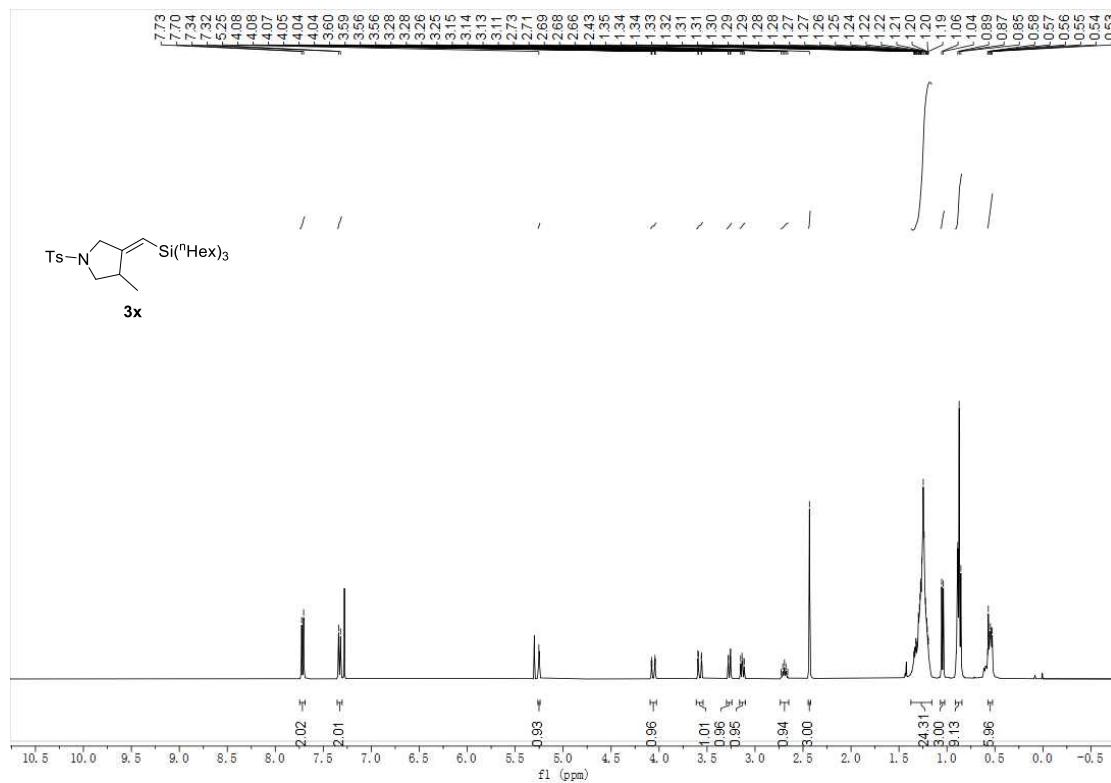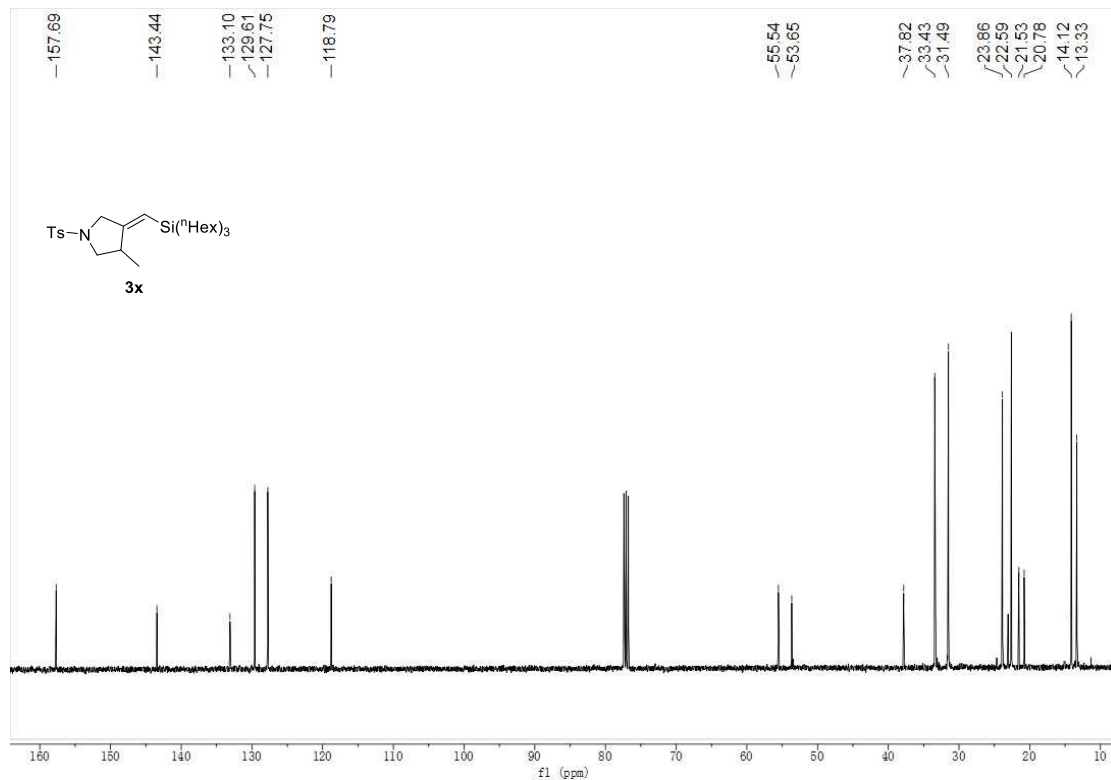

**(E)-3-((ethyldimethylsilyl)methylene)-4-methyl-1-tosyl-pyrrolidine (3y)**

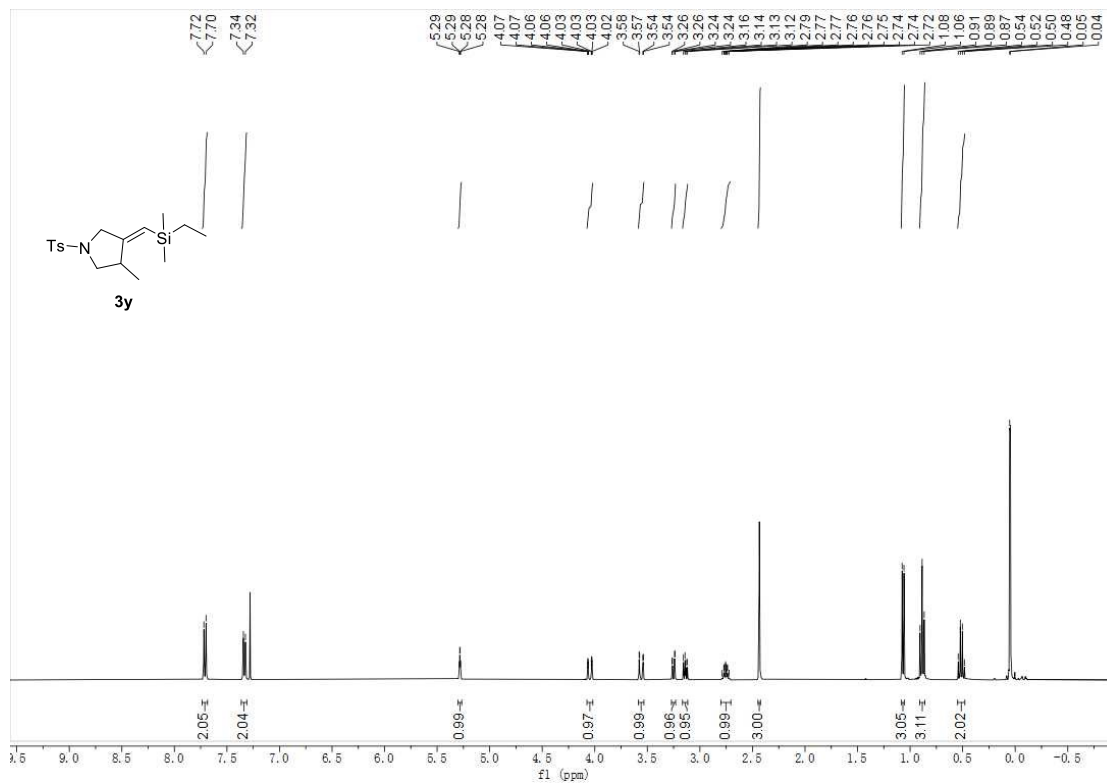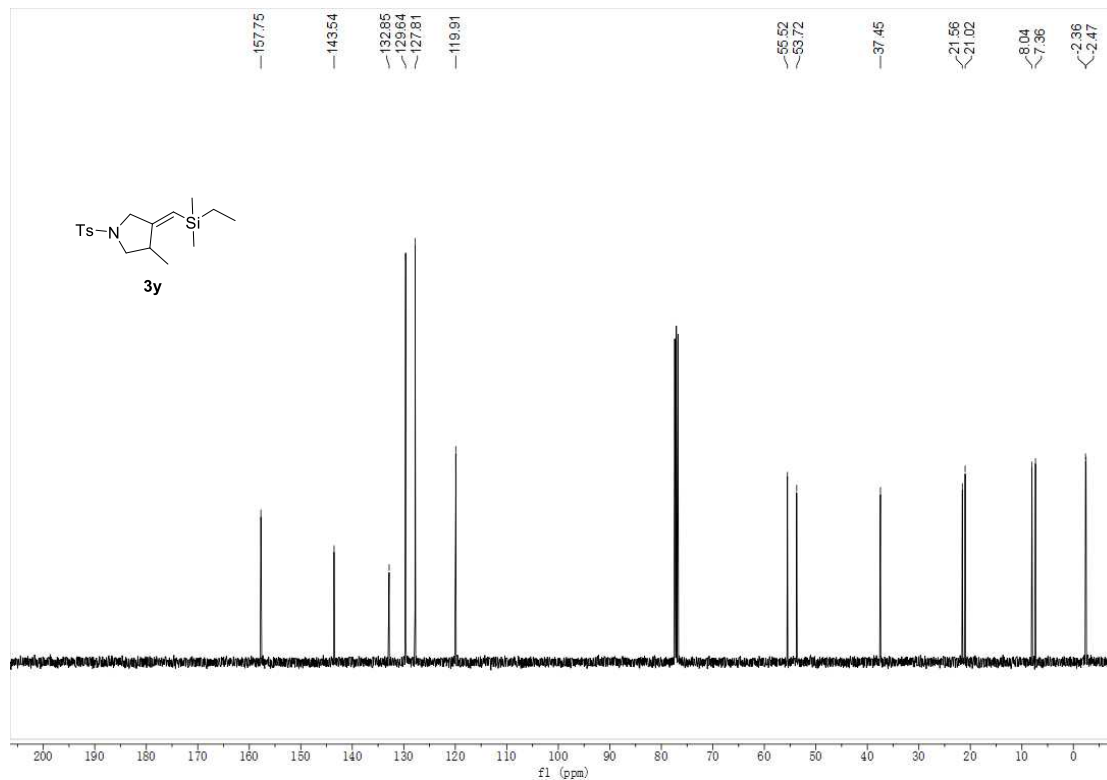

**(E)-3-((benzylidimethylsilyl)methylene)-4-methyl-1-tosylpyrrolidine (3z)**

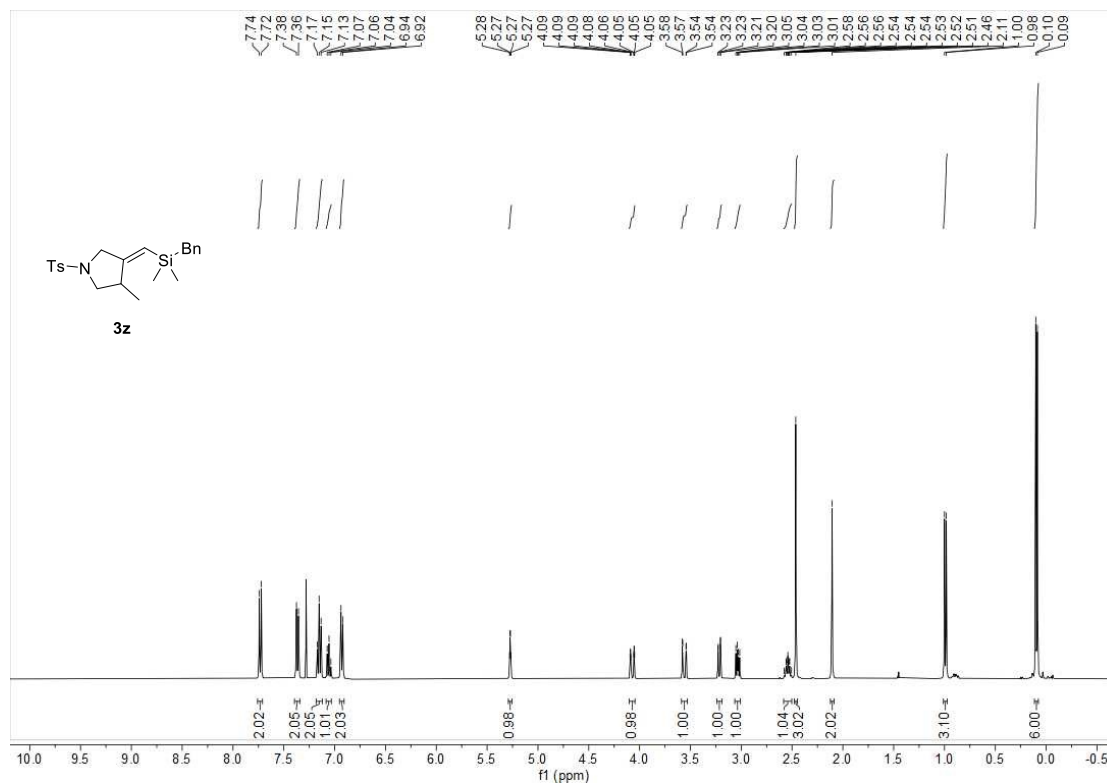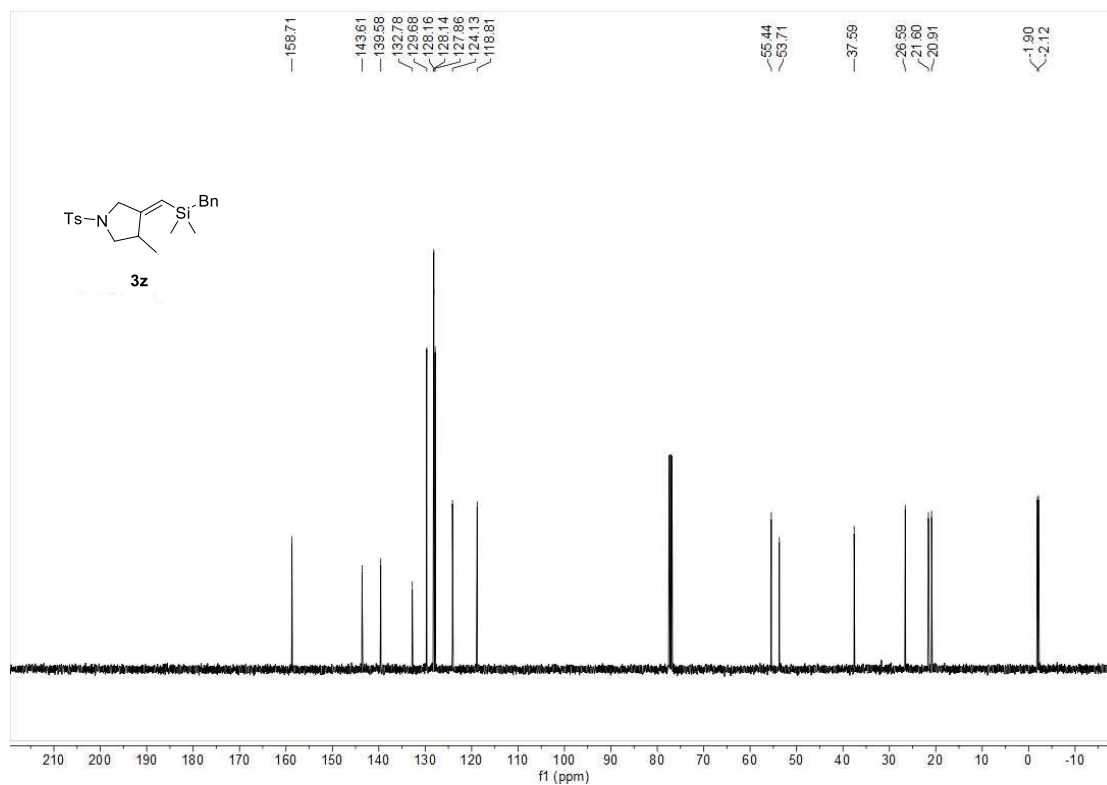

**(E)-3-((benzylidimethylsilyl)methylene)-4-methyl-1-tosylpyrrolidine (3aa)**

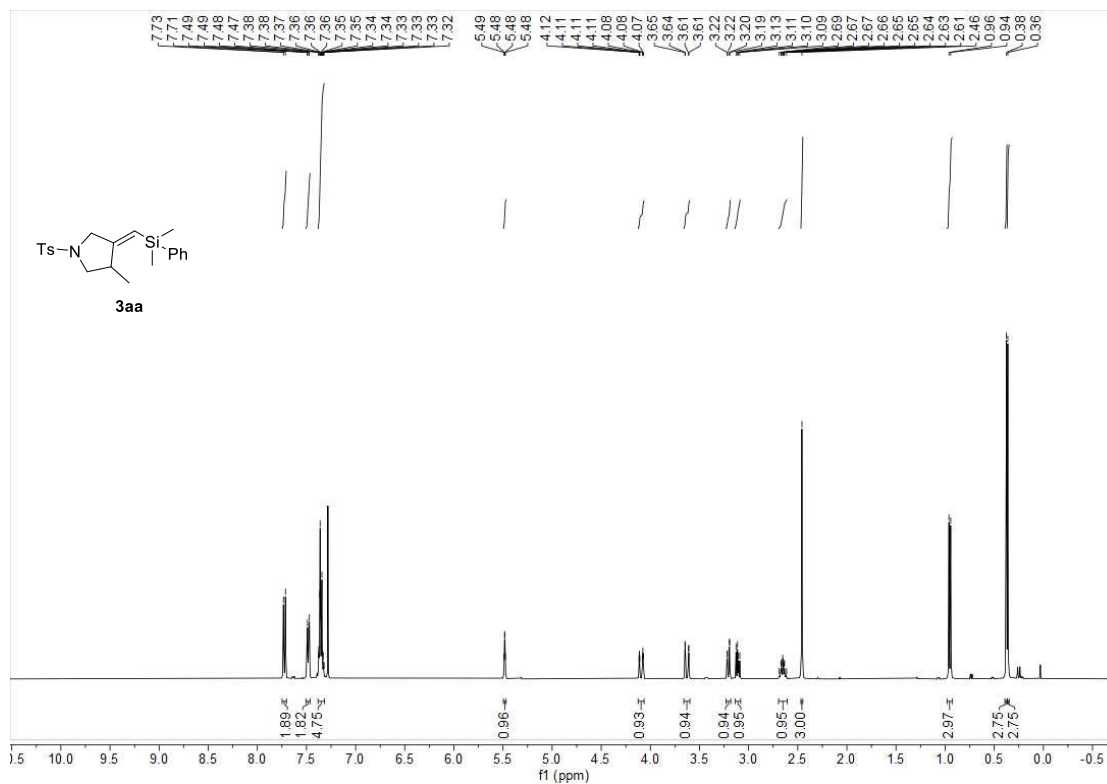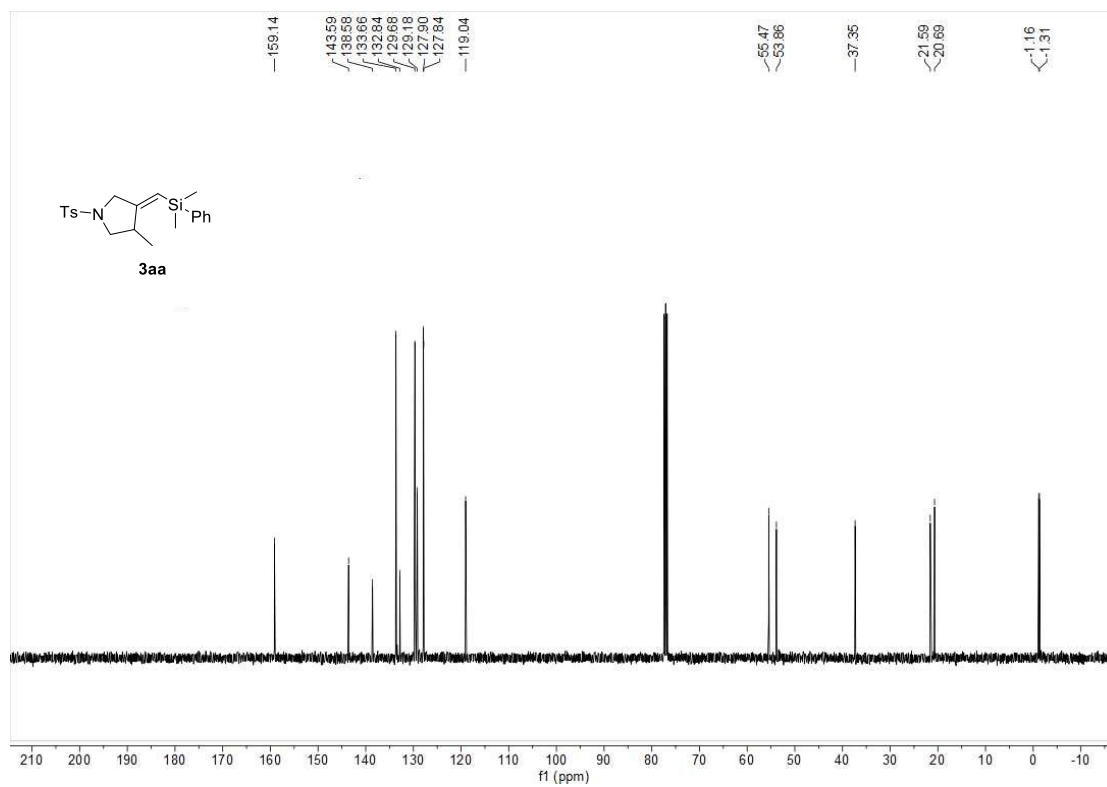

**(E)-3-(2,2-diphenylpropylidene)-4-methyl-1-tosylpyrrolidine (3ab)**

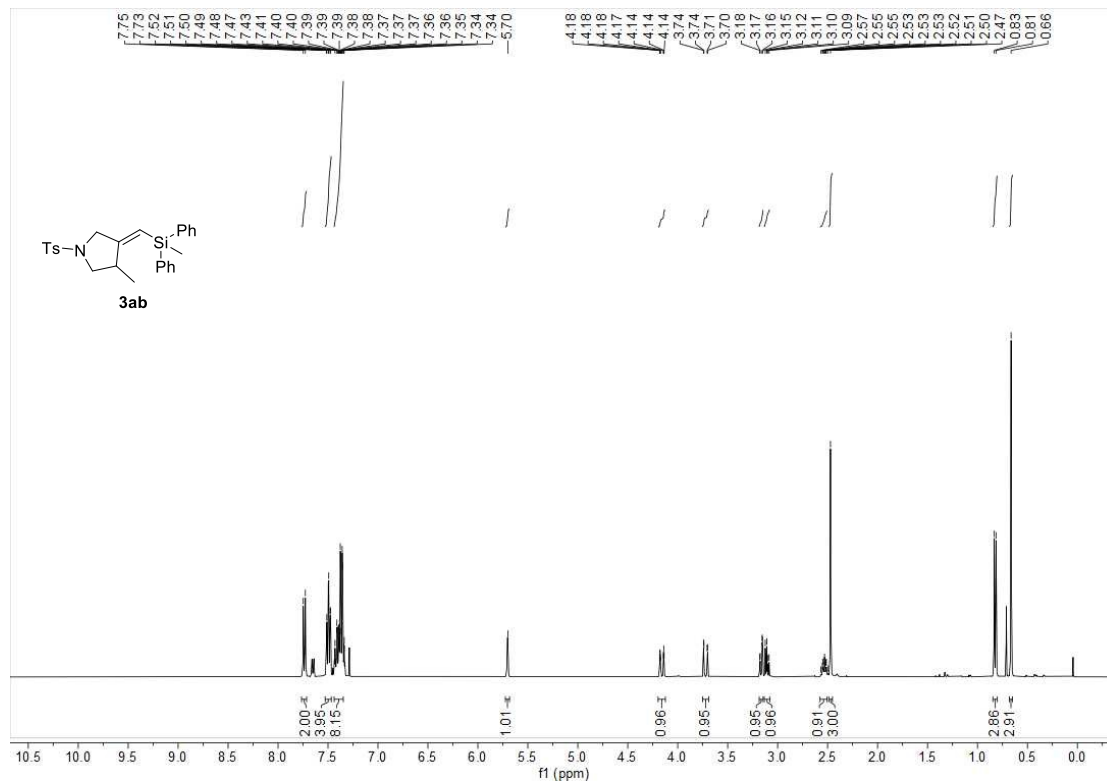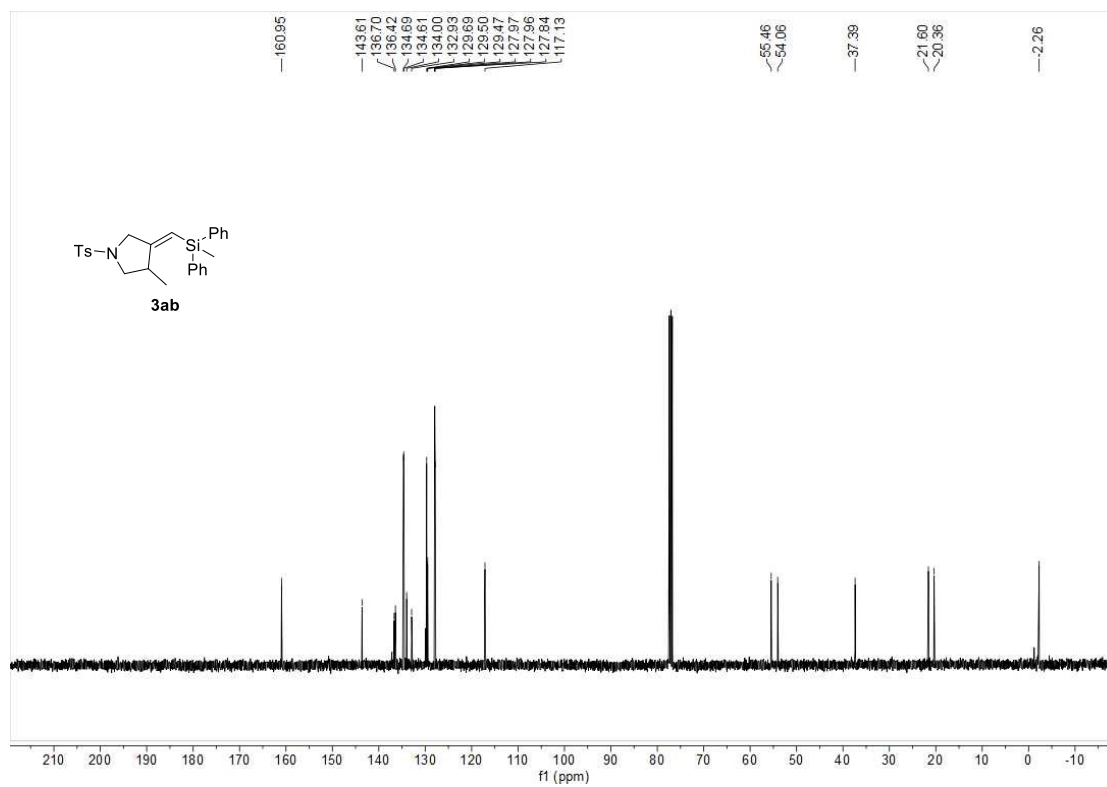



**(E)-3-methyl-1-tosyl-4-((triethoxysilyl)methylene)-313-pyrrolidine (3ac)**

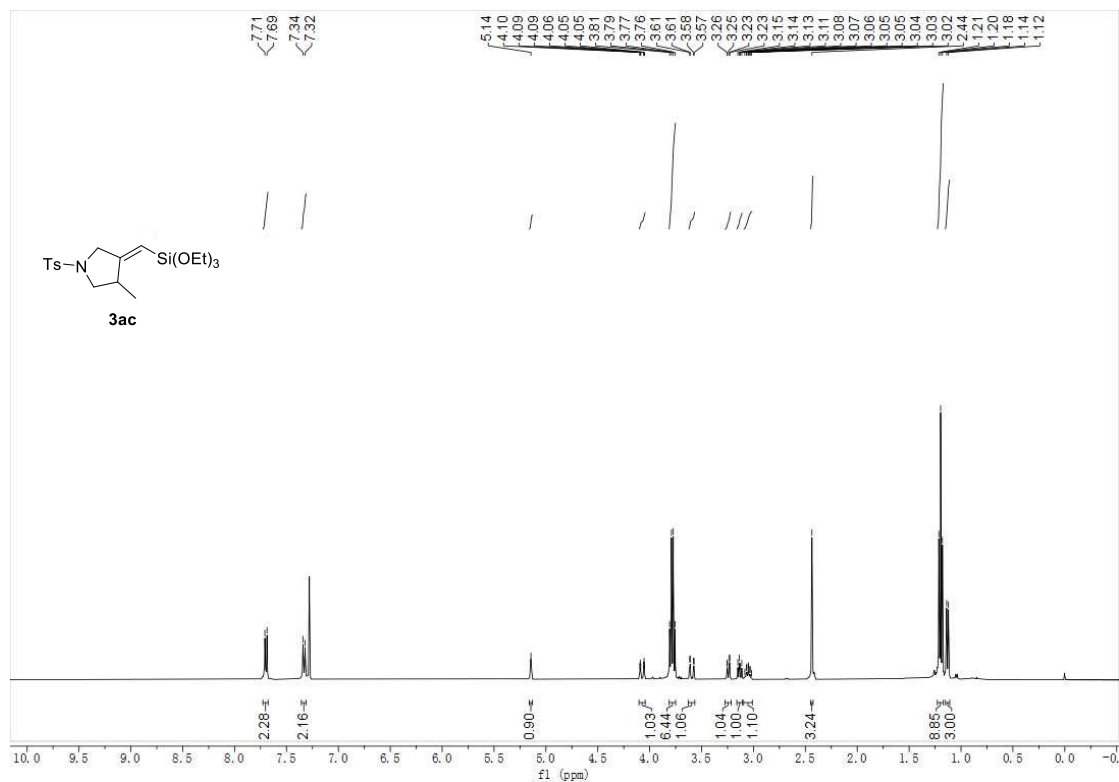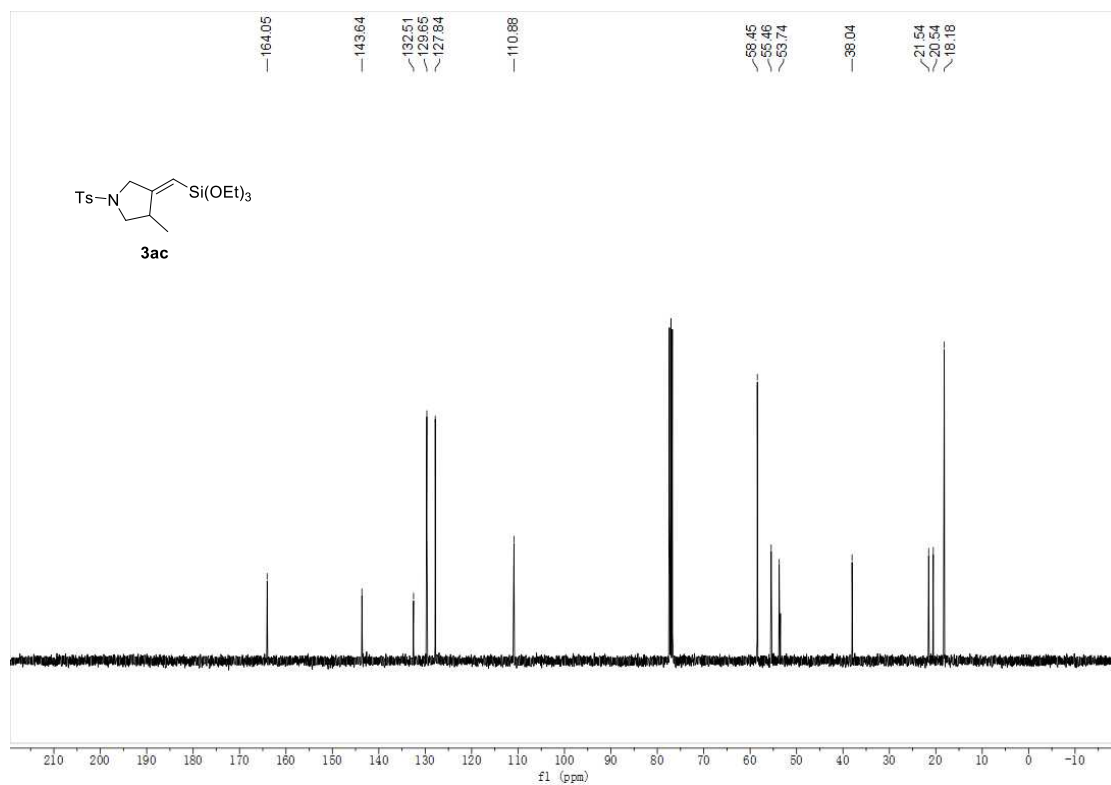

**(E)-3-methyl-1-tosyl-4-((triisopropoxysilyl)methylene)pyrrolidine (3ad)**

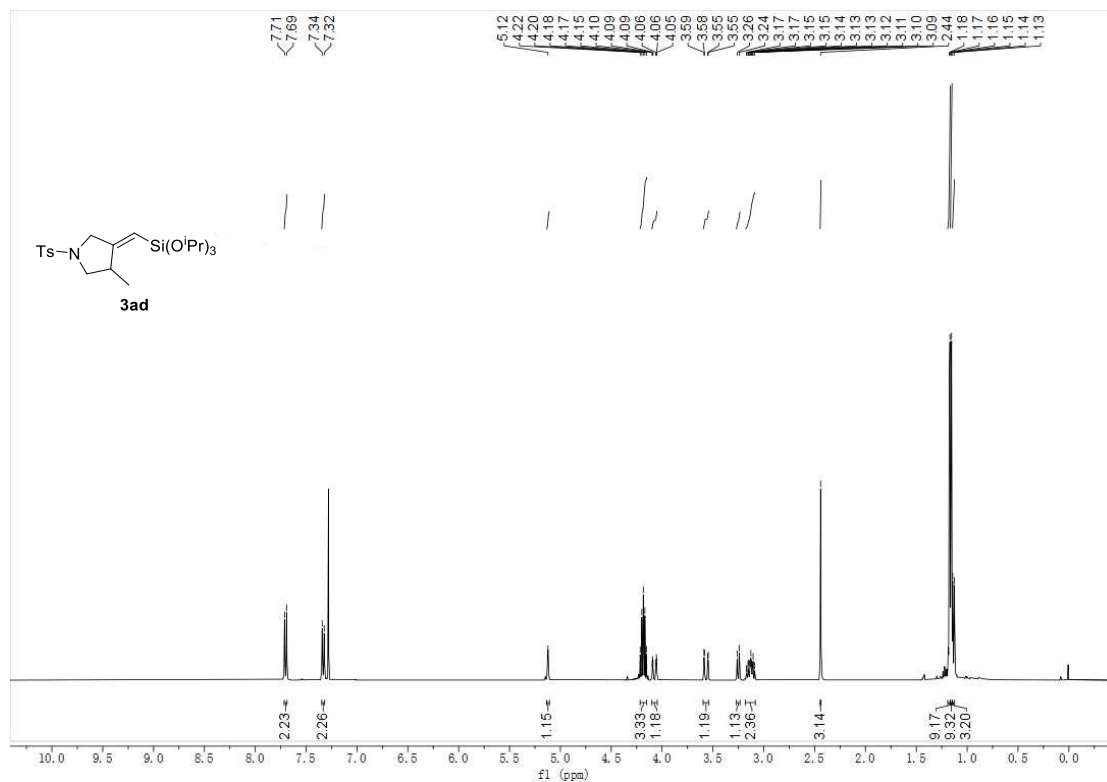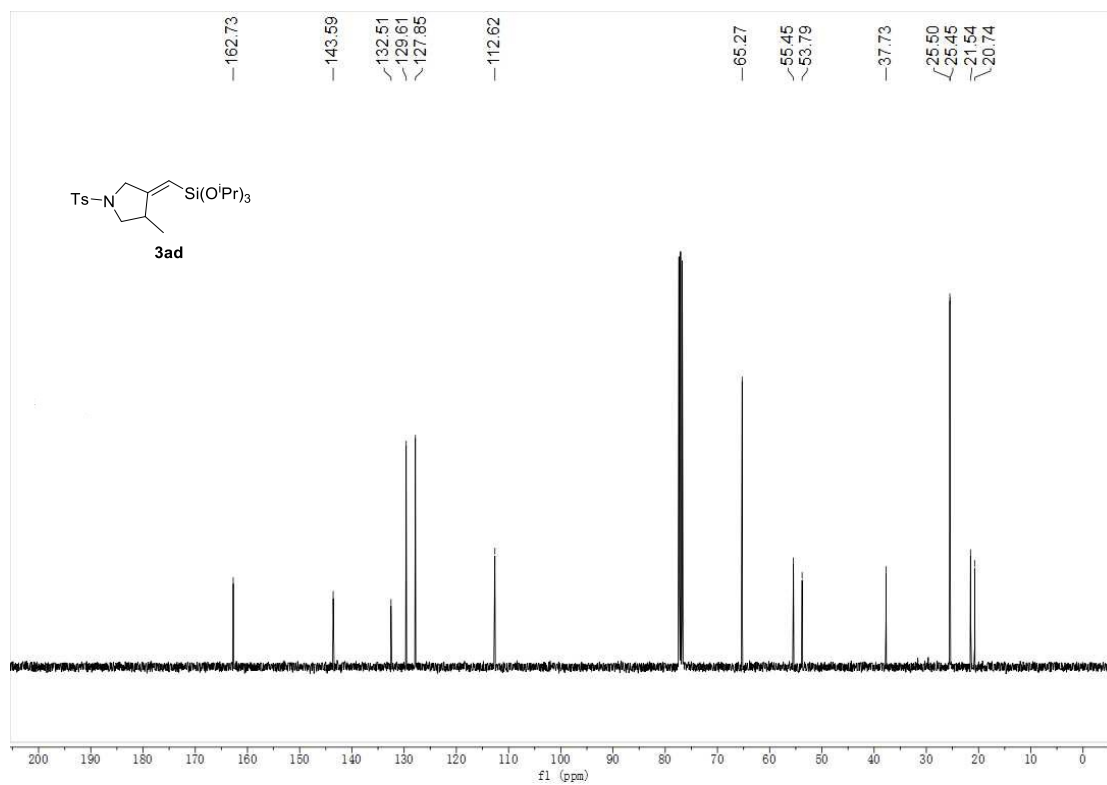

**(E)-3-((di-tert-butoxy(methyl)silyl)methylene)-4-methyl-1-tosylpyrrolidine (3ae)**

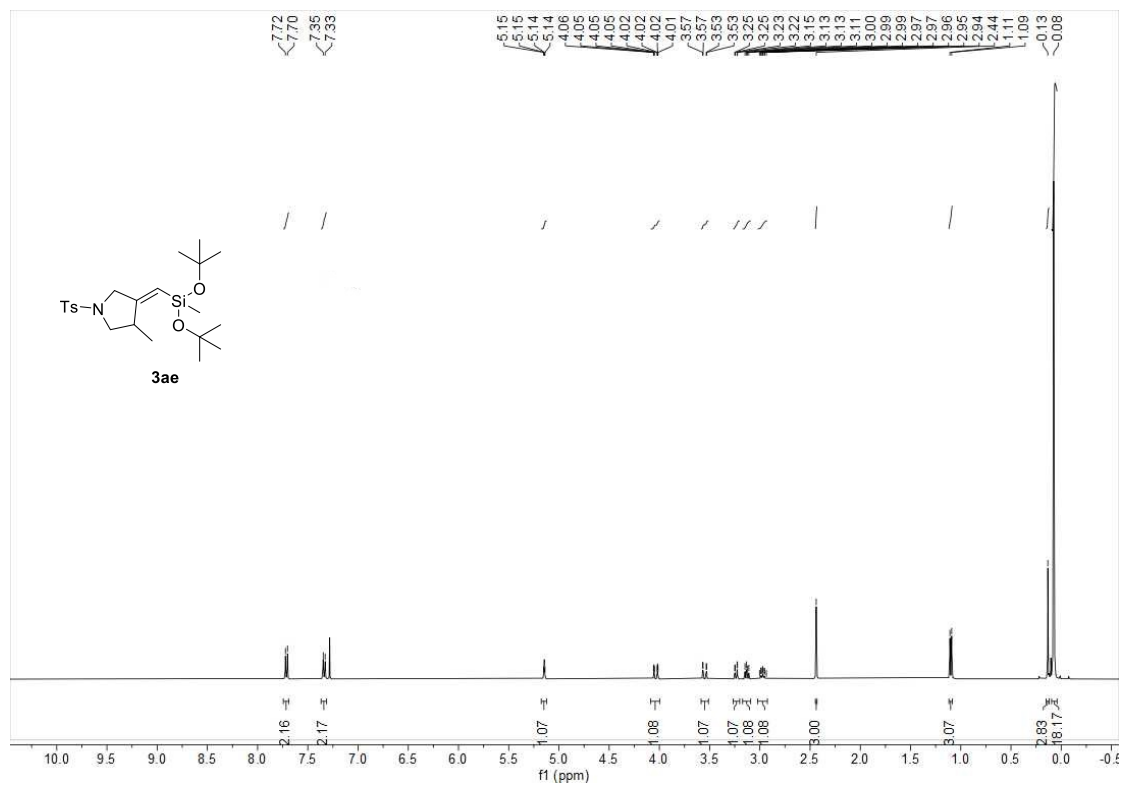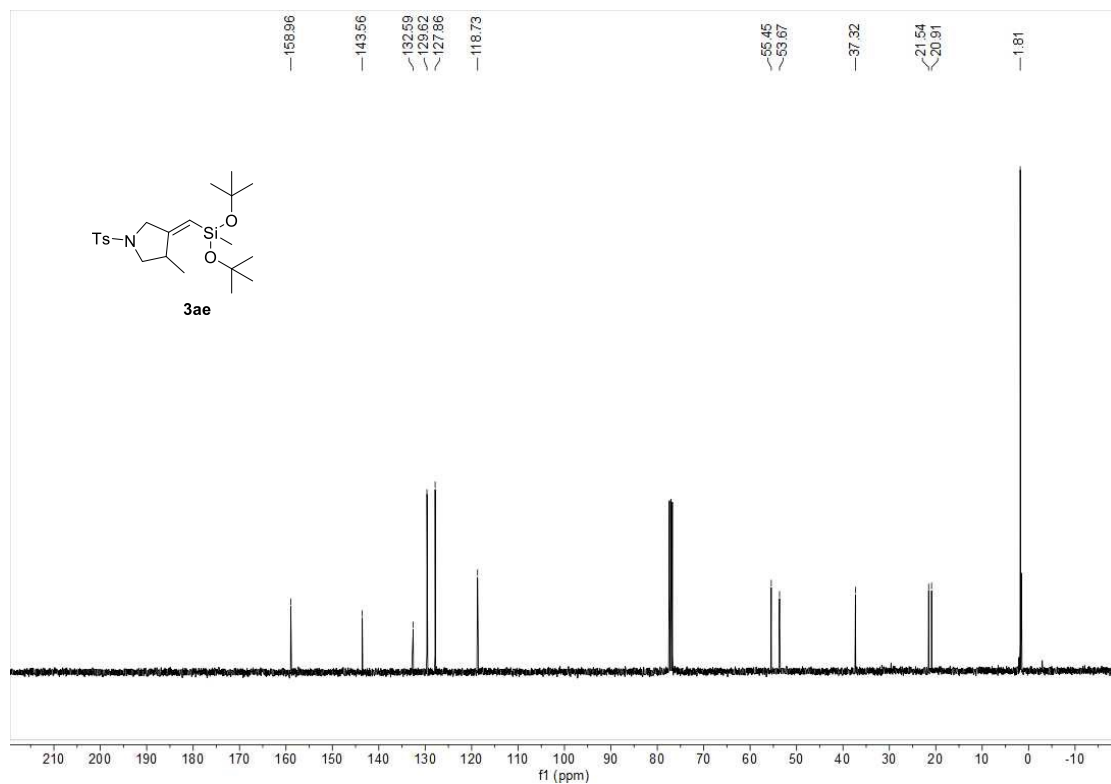

# 1-(4-Toluenesulfonyl)-3-methylidene-4-methylpyrrolidine (3a')

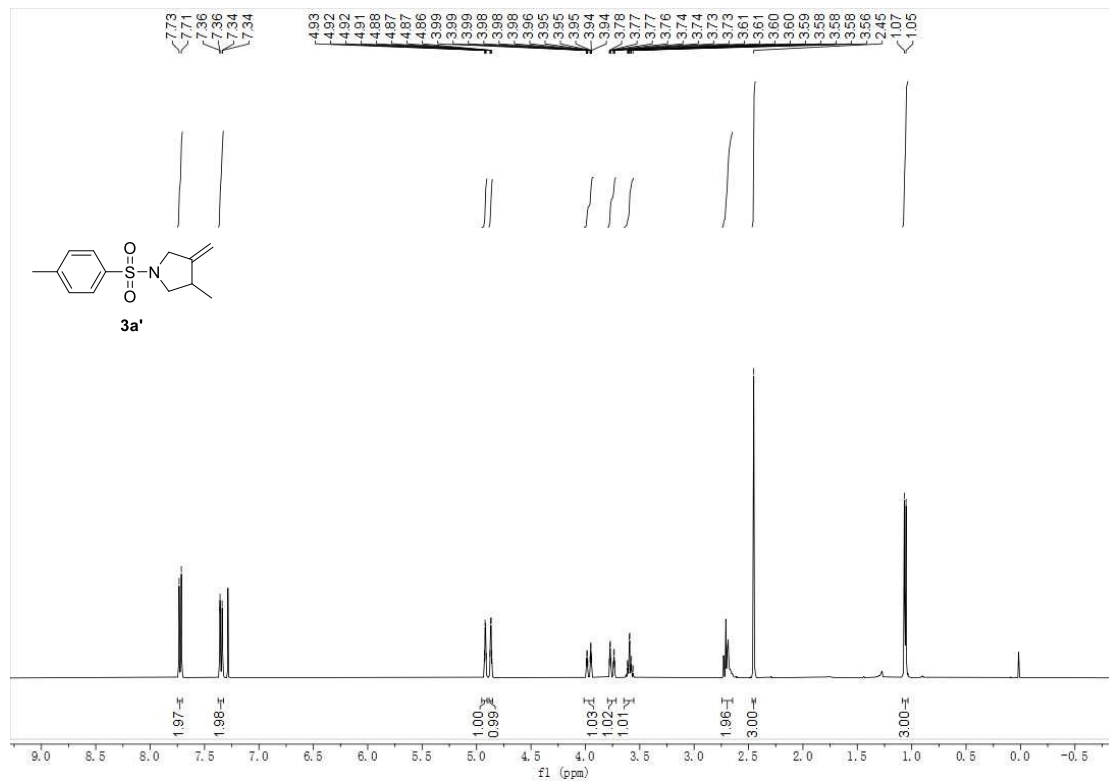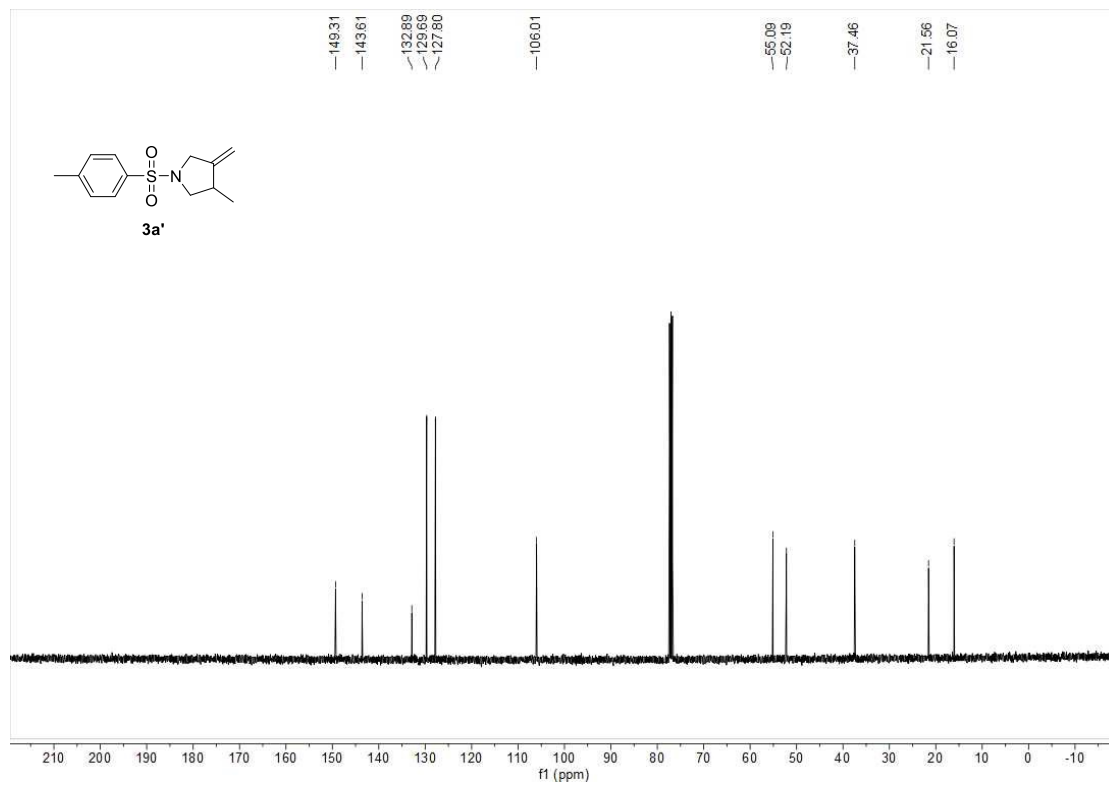

**3-methyl-4-methylene-1-(phenylsulfonyl)pyrrolidine (3b')**

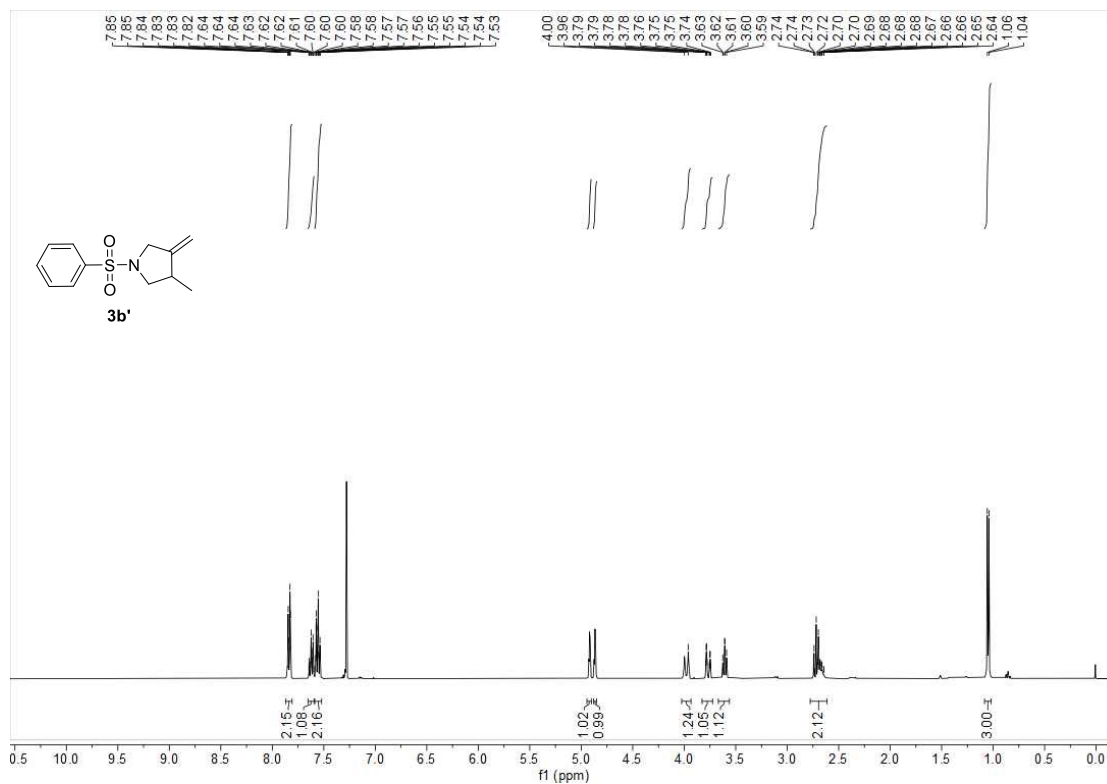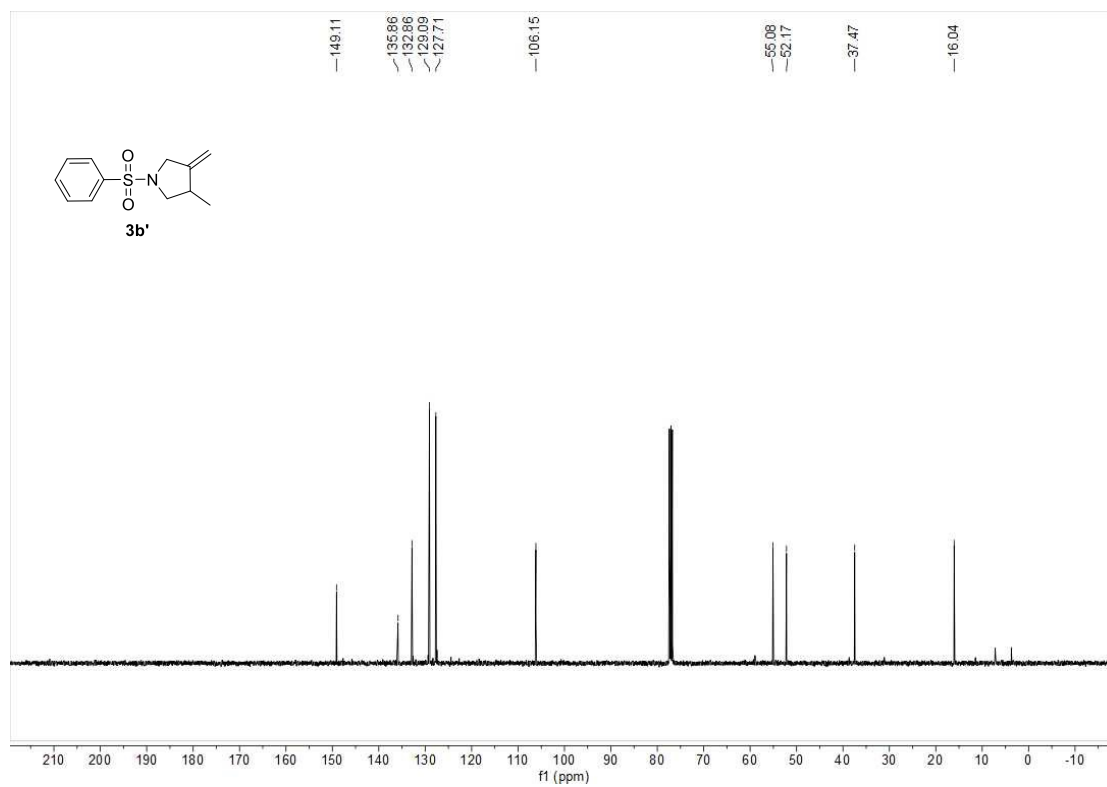

**1-((4-chlorophenyl)sulfonyl)-3-methyl-4-methylenepyrrolidine (3c')**

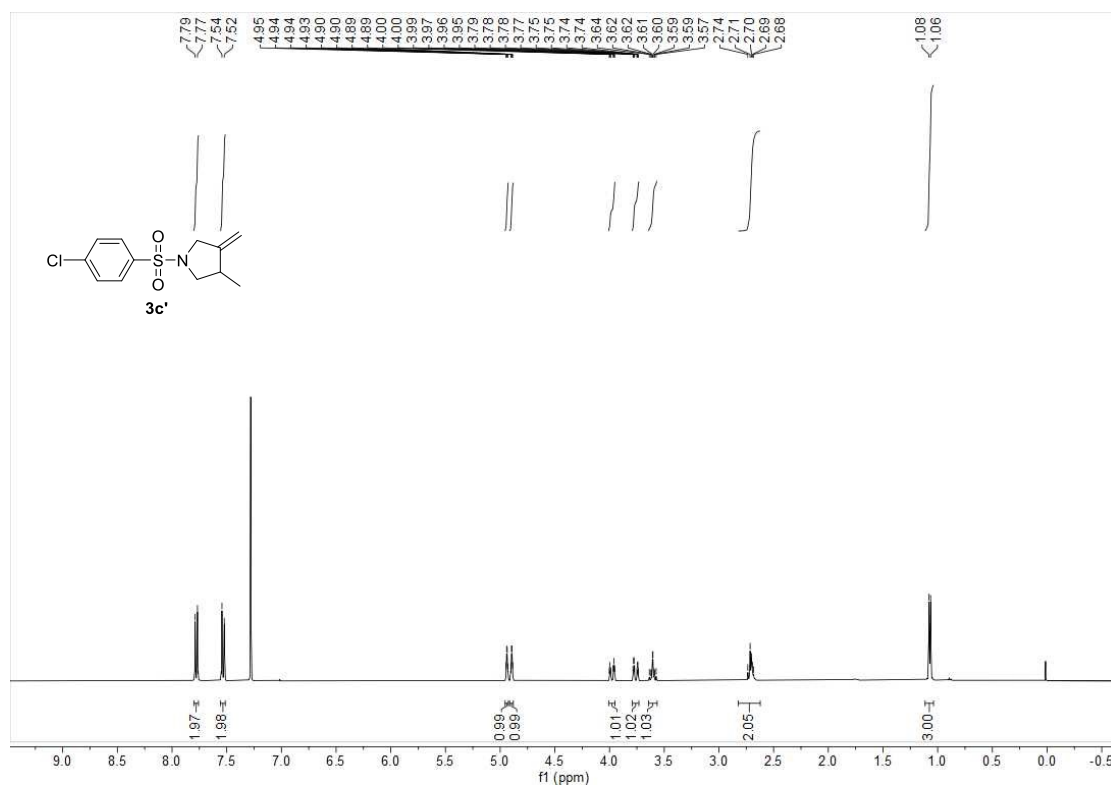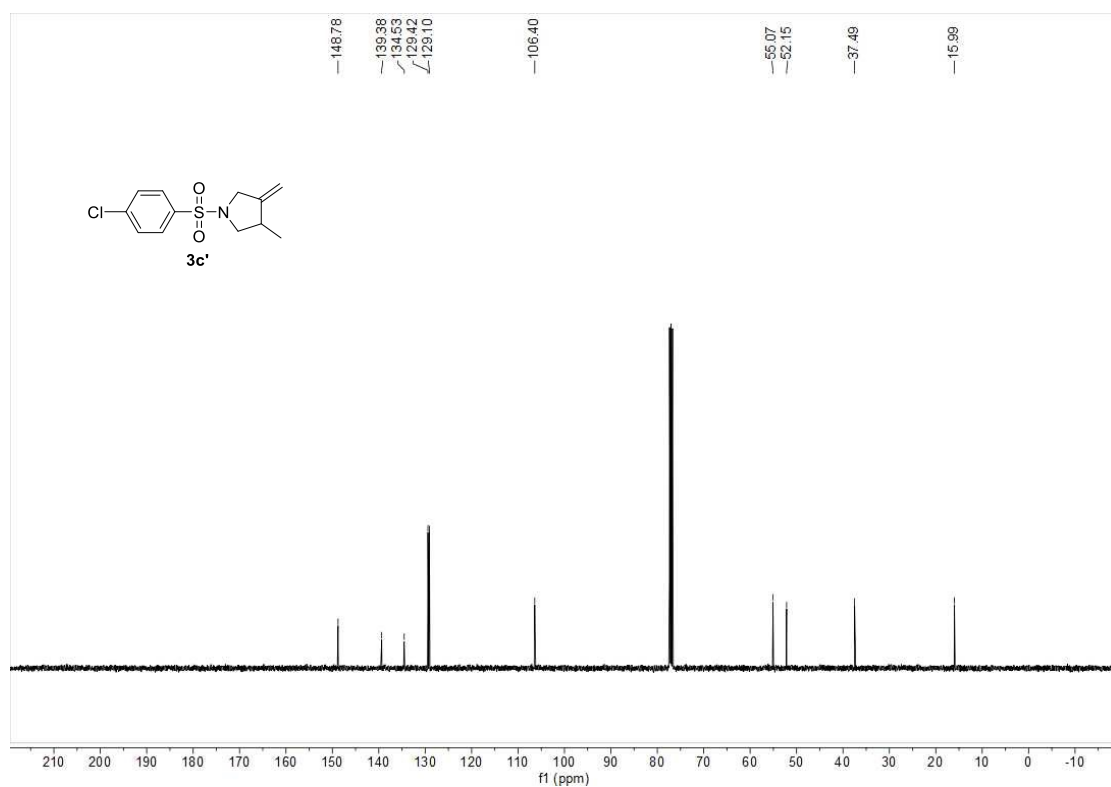

**1-([1,1'-biphenyl]-4-ylsulfonyl)-3-methyl-4-methylenepyrrolidine (3d')**

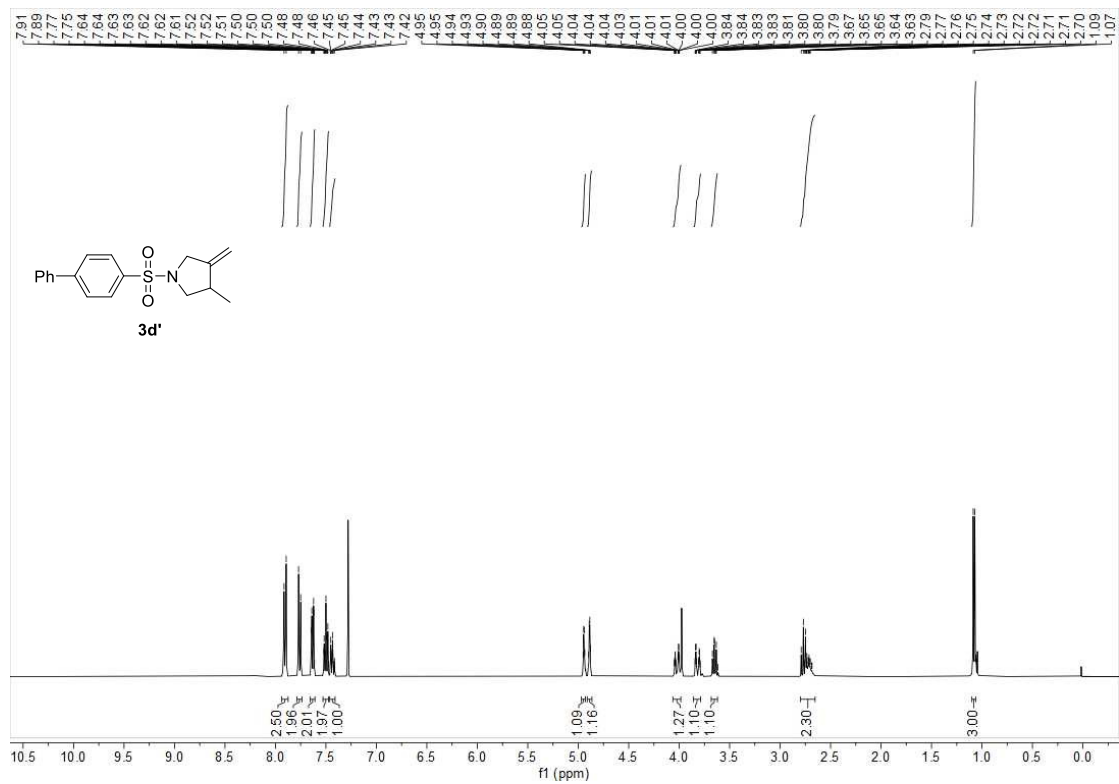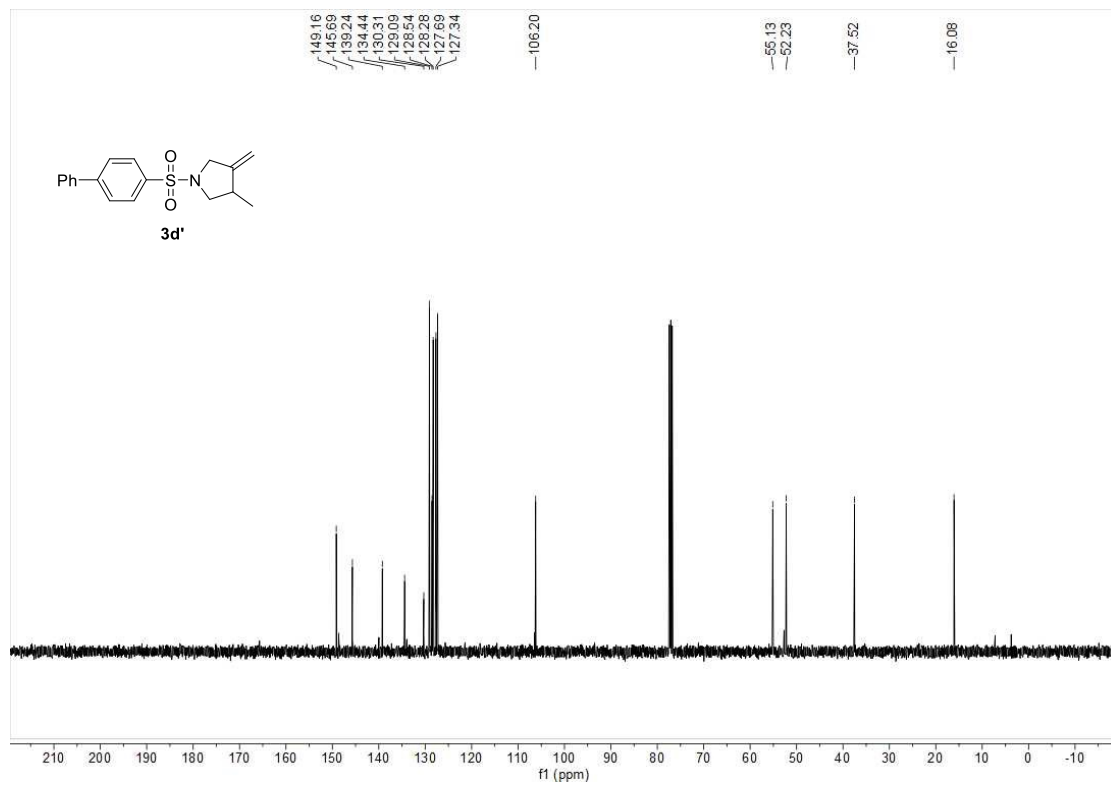

1-((4-methoxyphenyl)sulfonyl)-3-methyl-4-methylenepyrrolidine (3e')

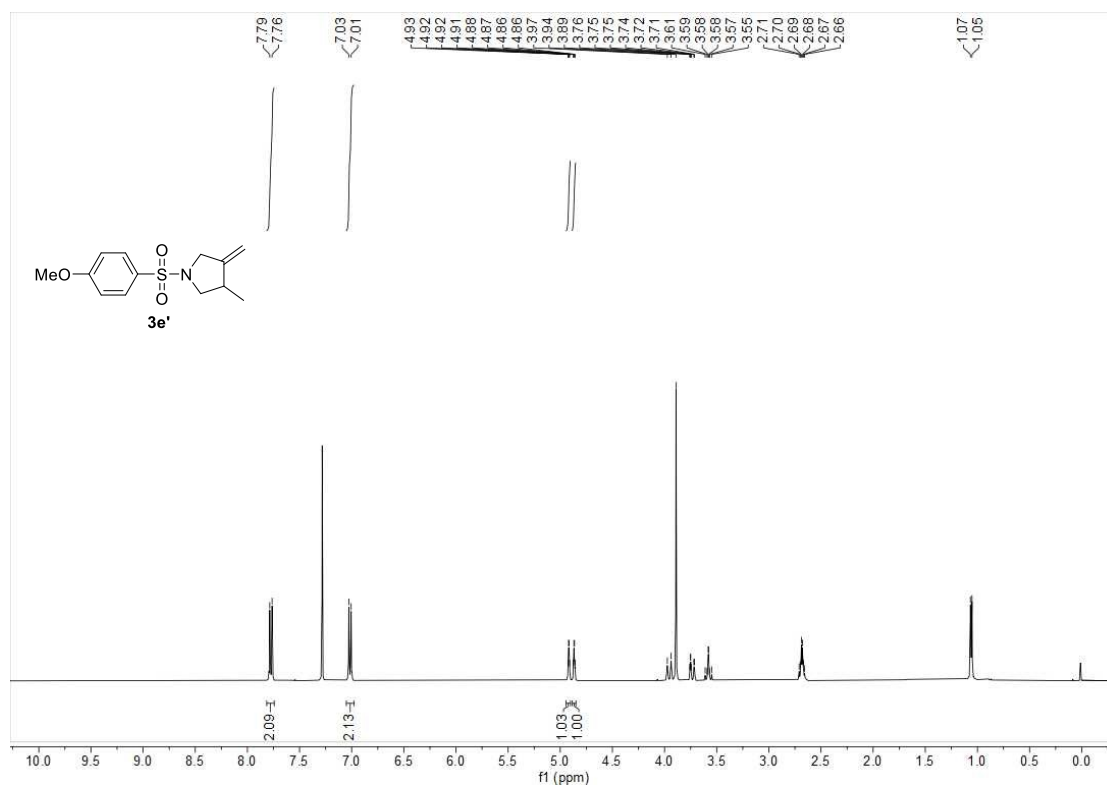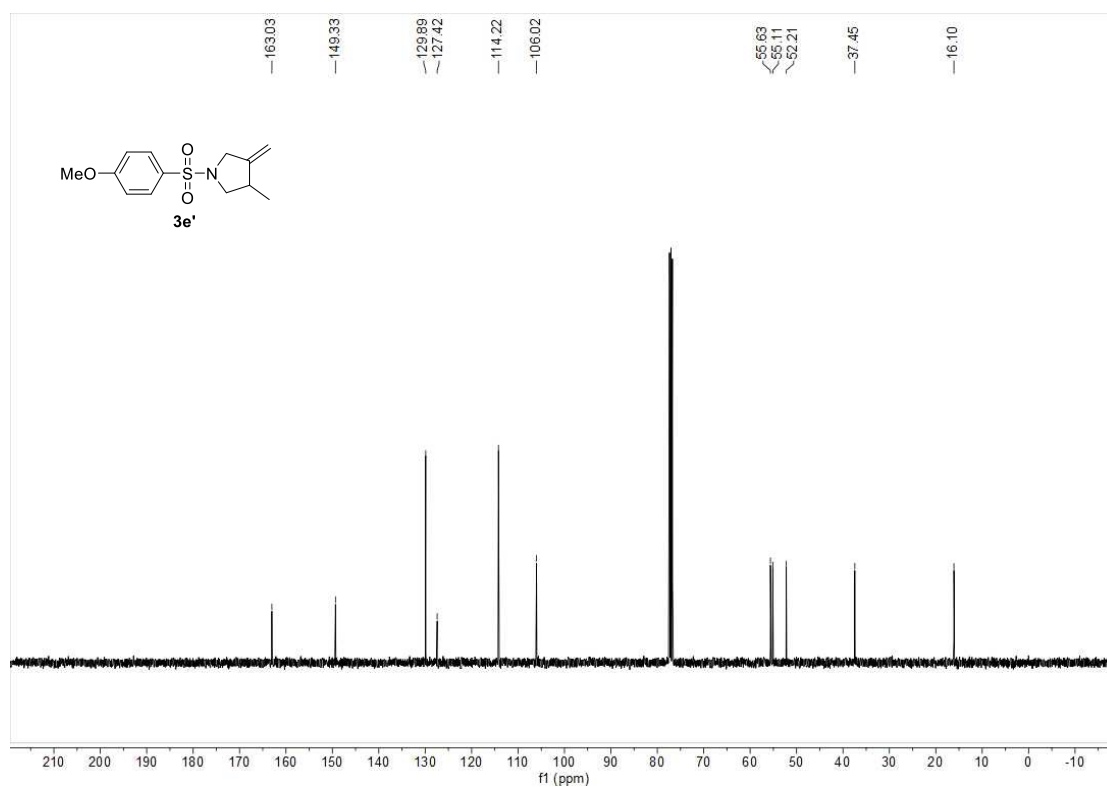



**3-methyl-4-methylene-1-((4-(trifluoromethoxy)phenyl)sulfonyl)pyrrolidine (3f')**

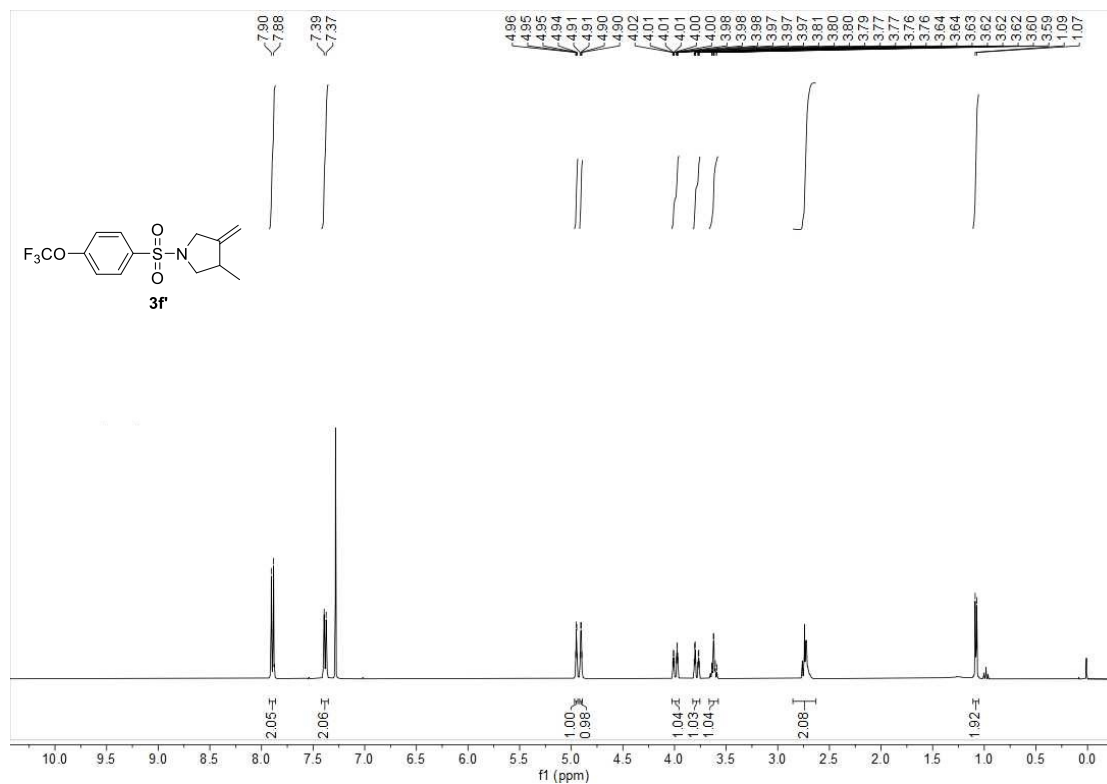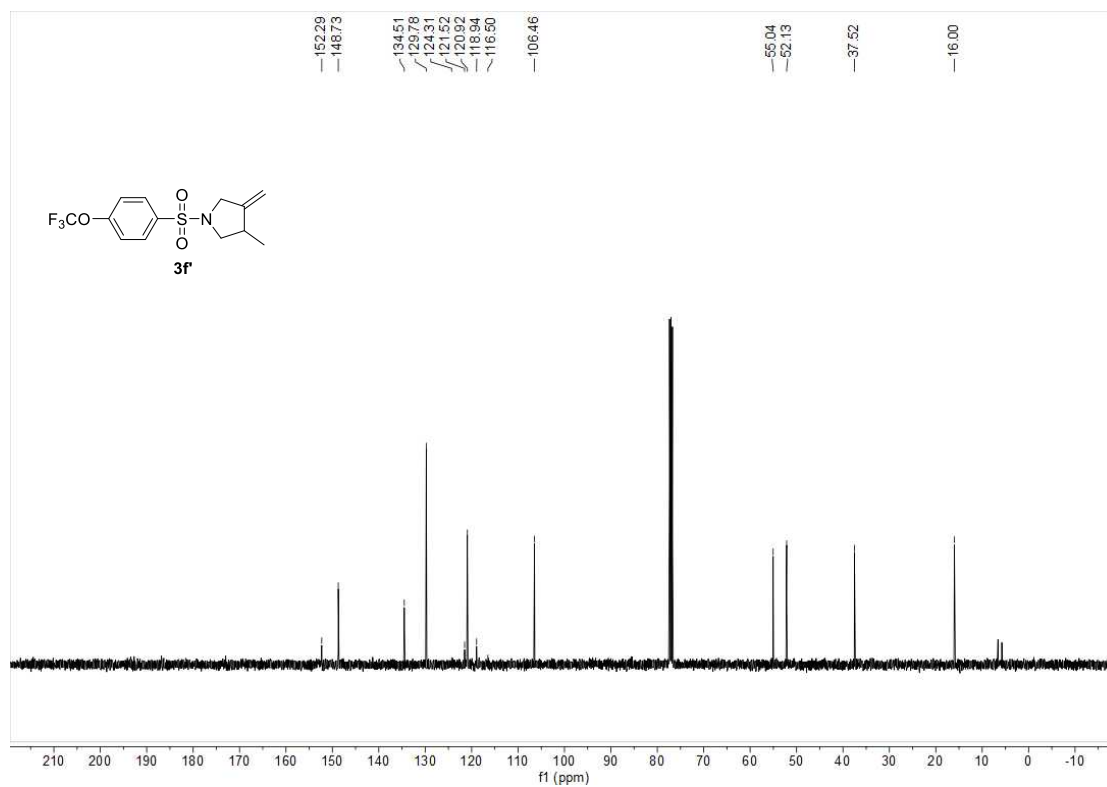

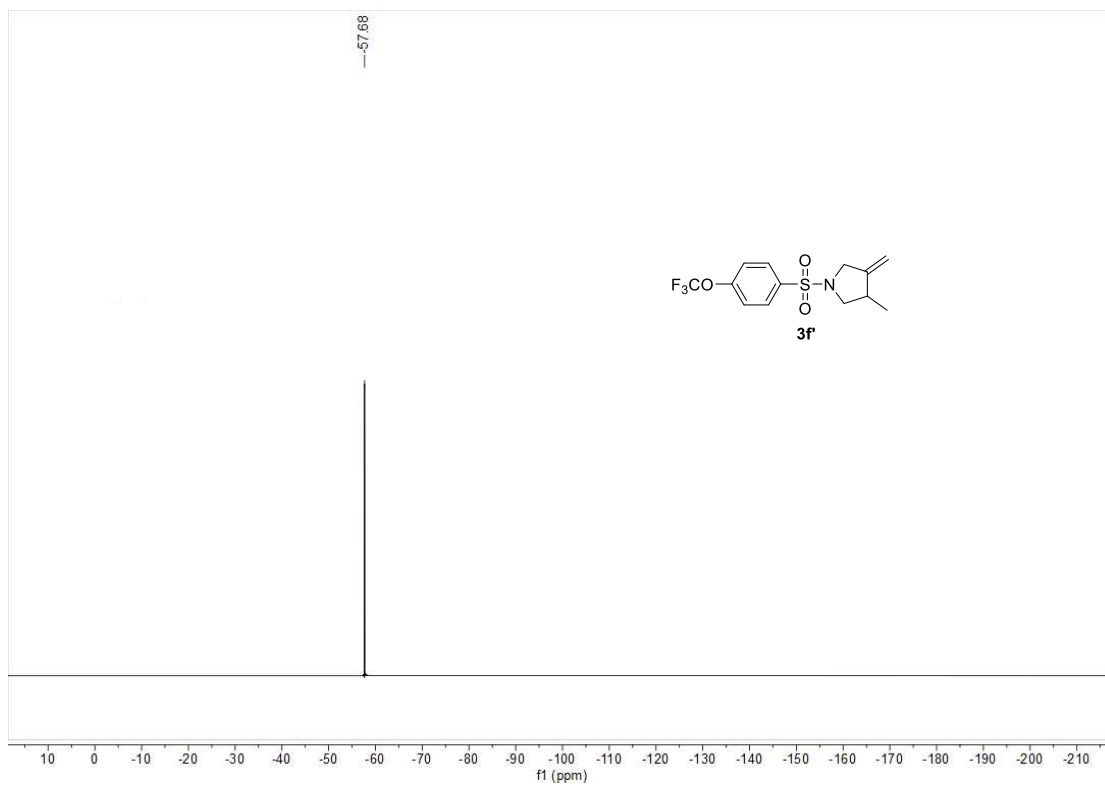

**3-methyl-4-methylene-1-((4-nitrophenyl)sulfonyl)pyrrolidine (3g')**

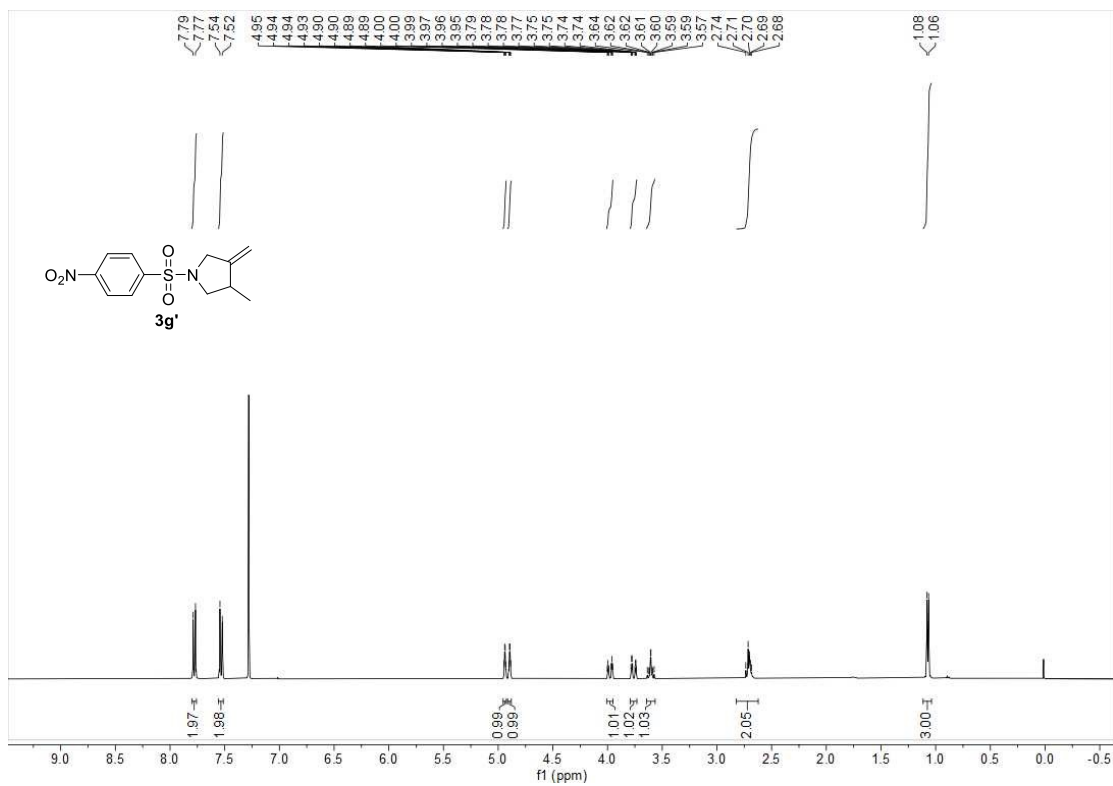

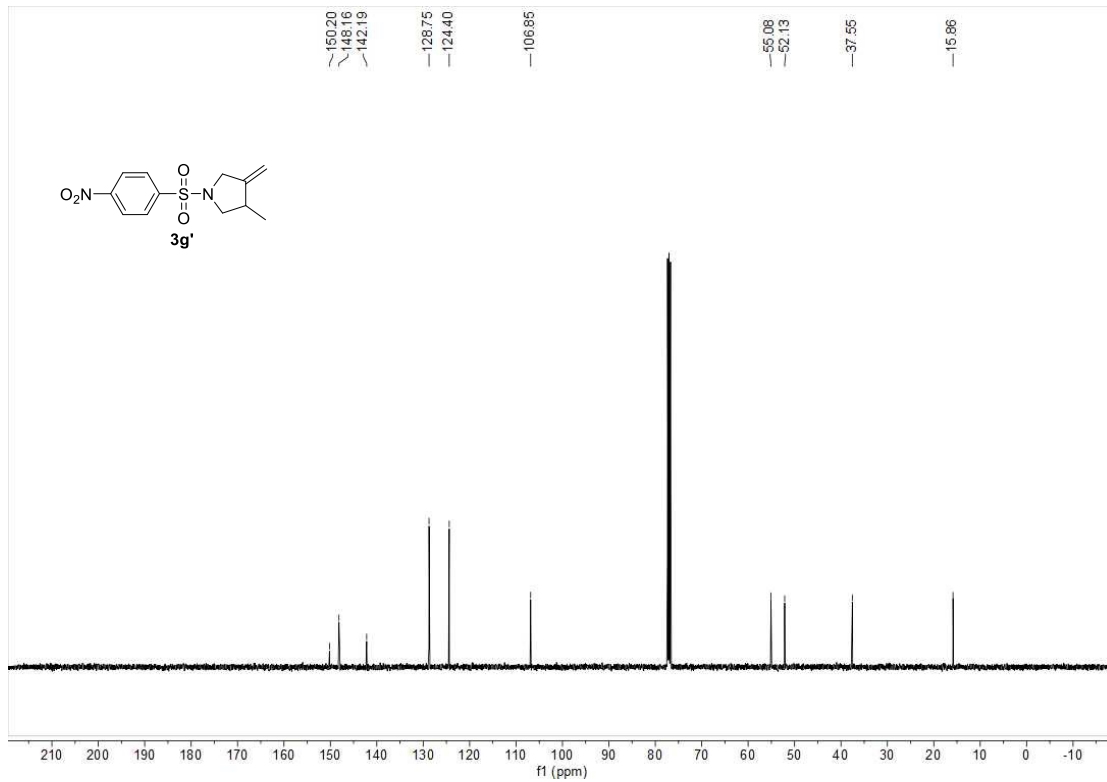

**methyl 4-((3-methyl-4-methylenepyrrolidin-1-yl)sulfonyl)benzoate (3h')**

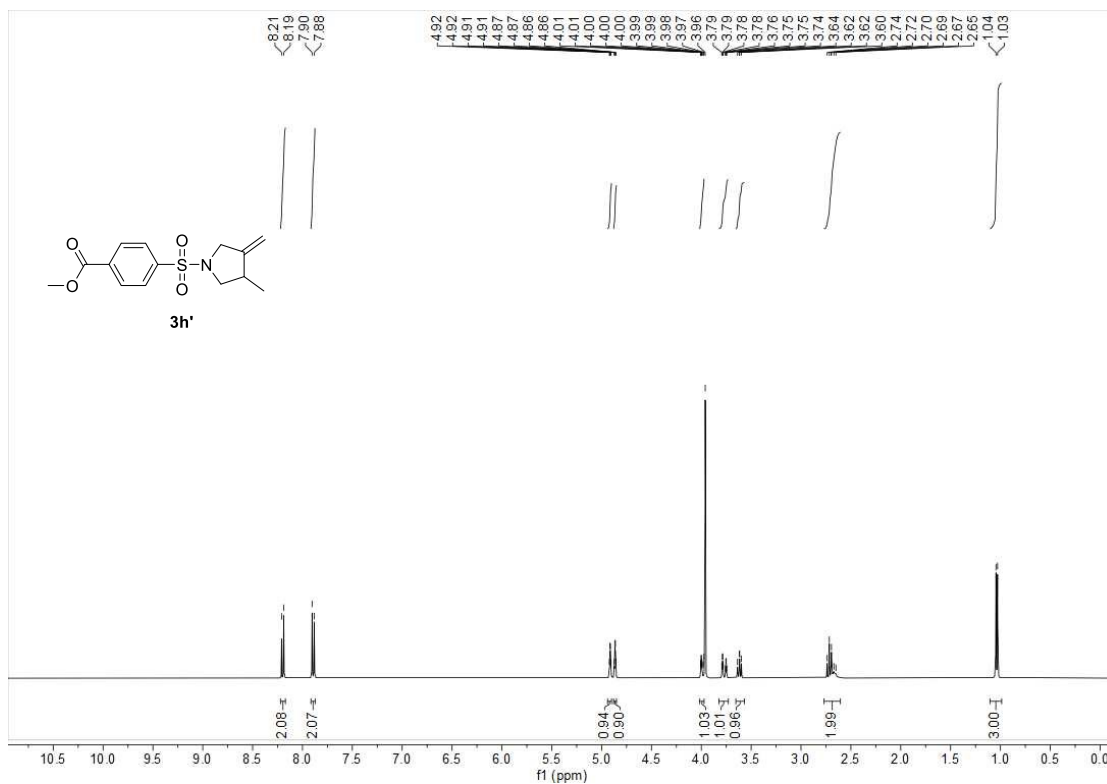

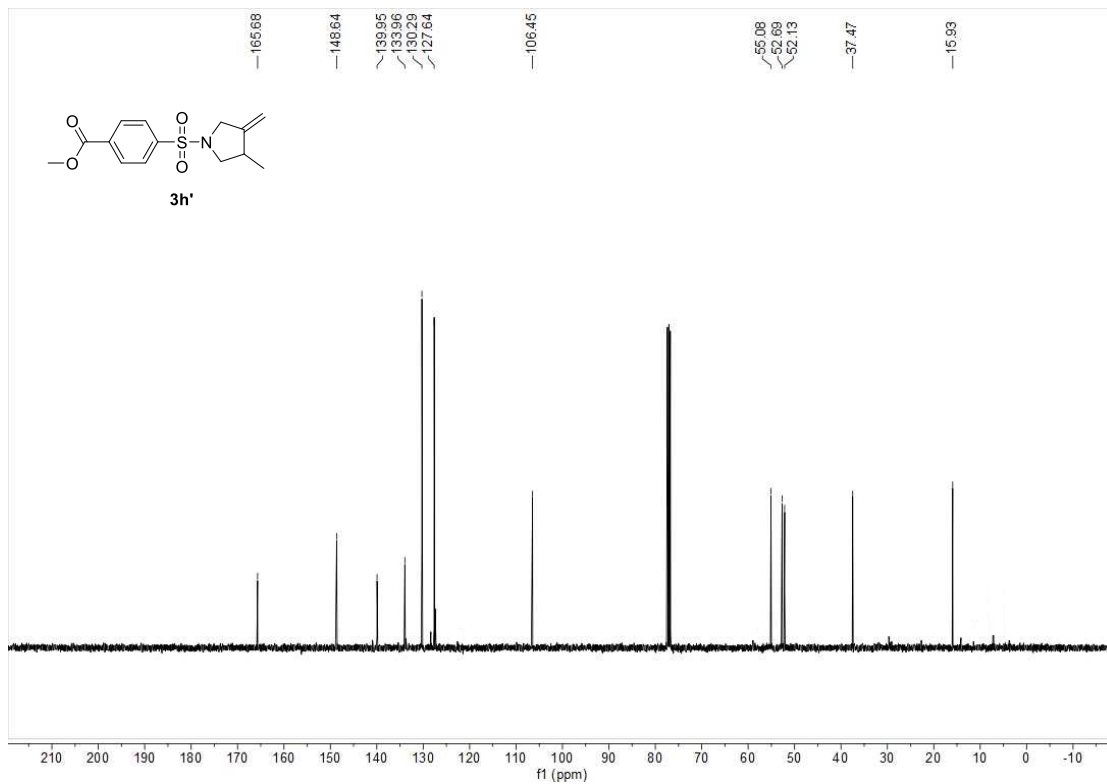

**3-methyl-4-methylene-1-(4-(trifluoromethyl)phenyl)sulfonylpyrrolidine (3i')**

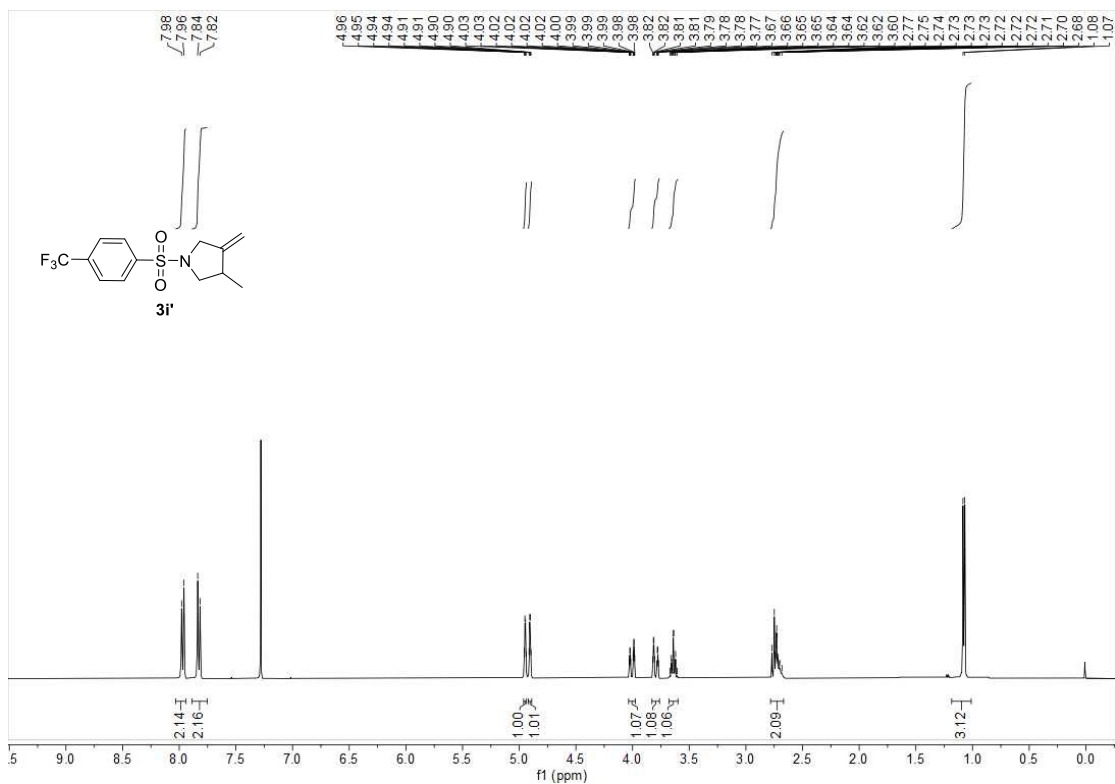

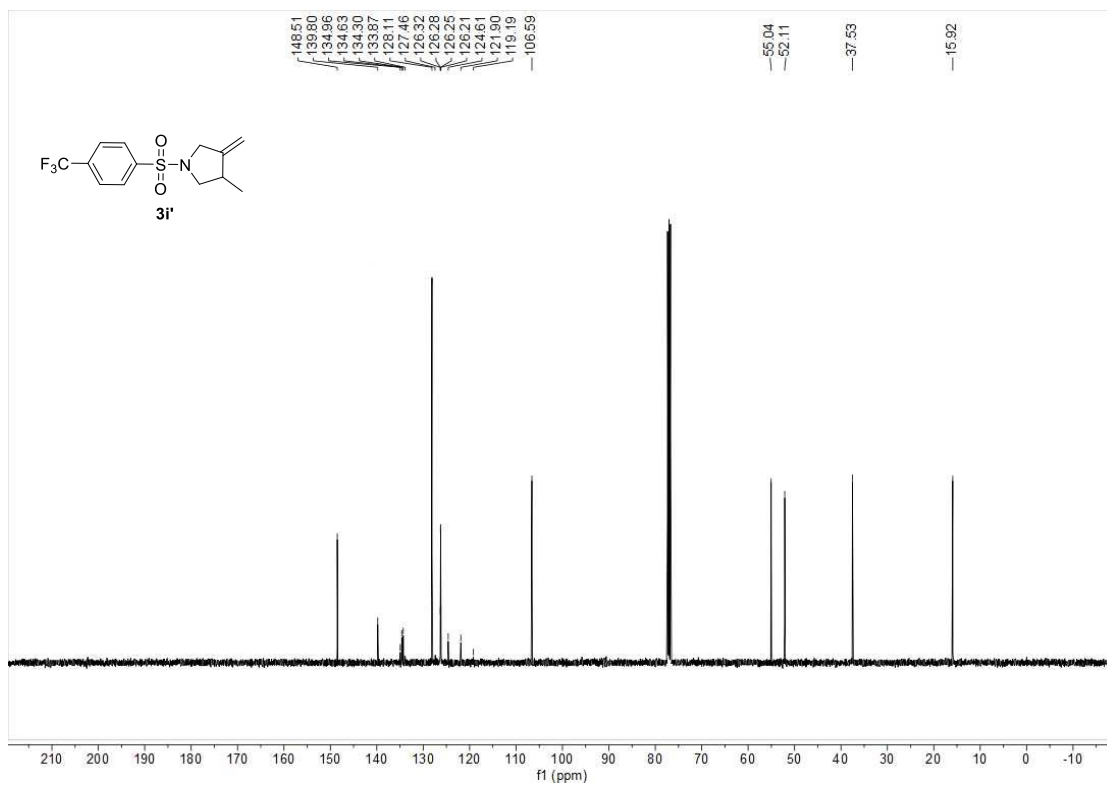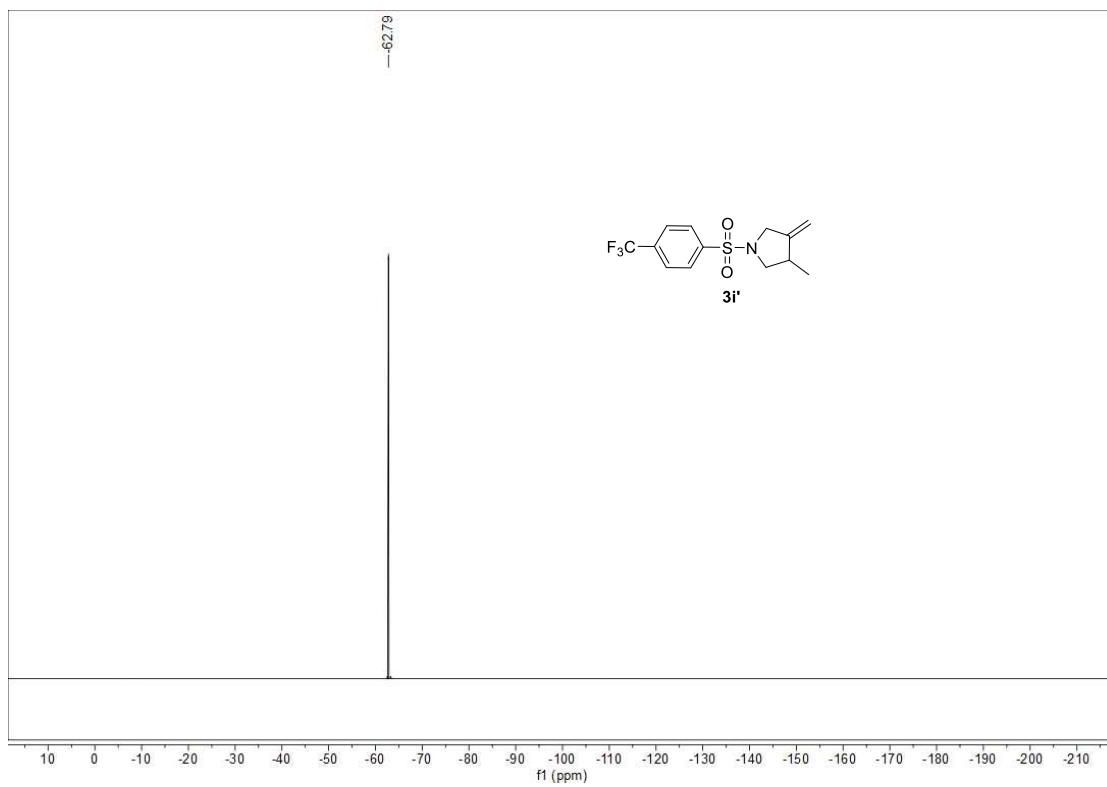

**3-methyl-4-methylene-1-(m-tolylsulfonyl)pyrrolidine (3j')**

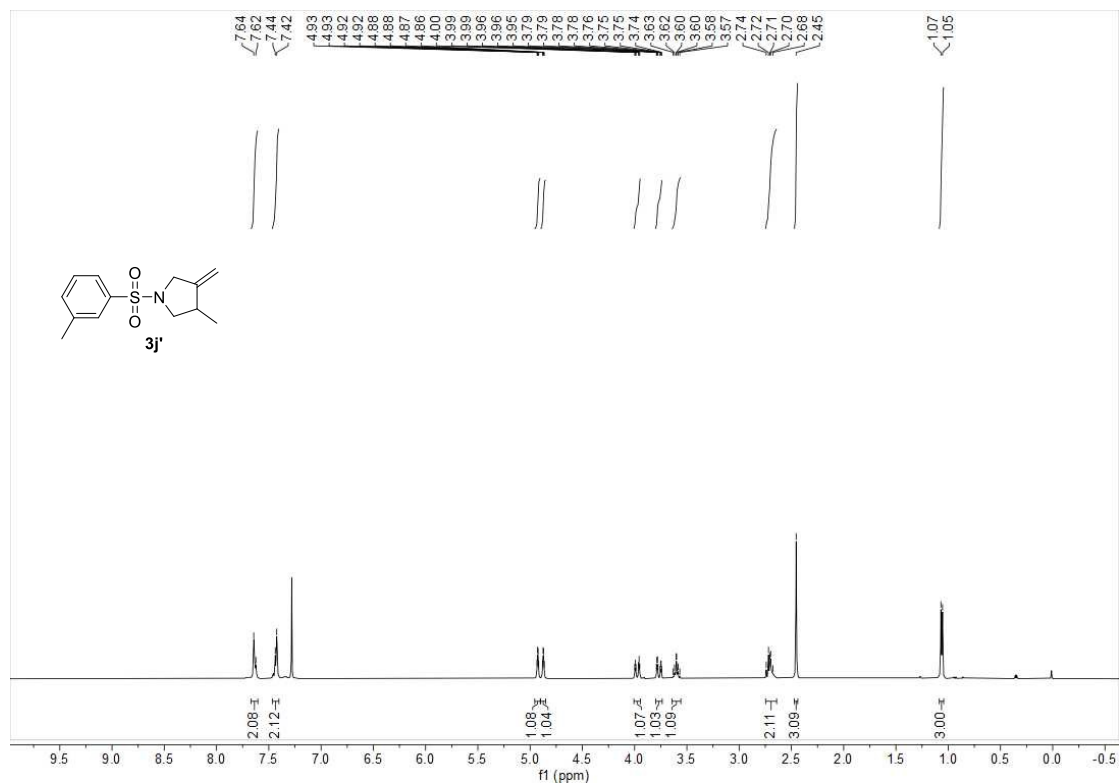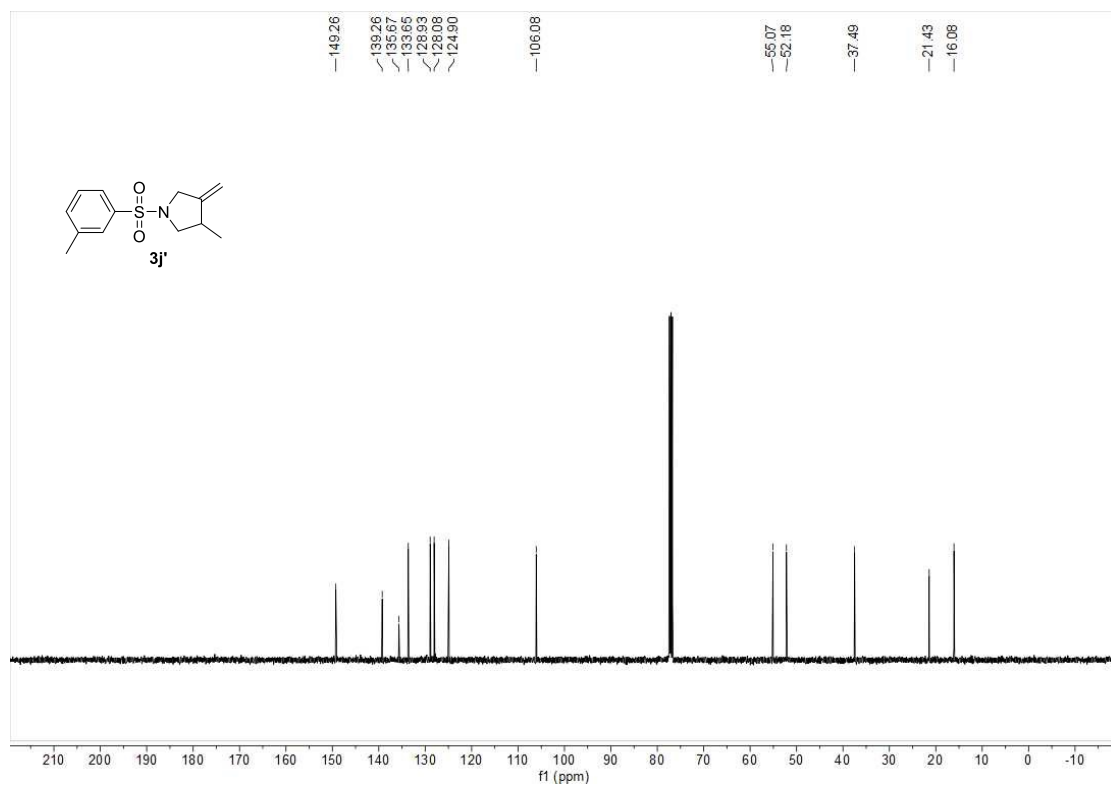

**1-((3-bromophenyl)sulfonyl)-3-methyl-4-methylenepyrrolidine (3k')**

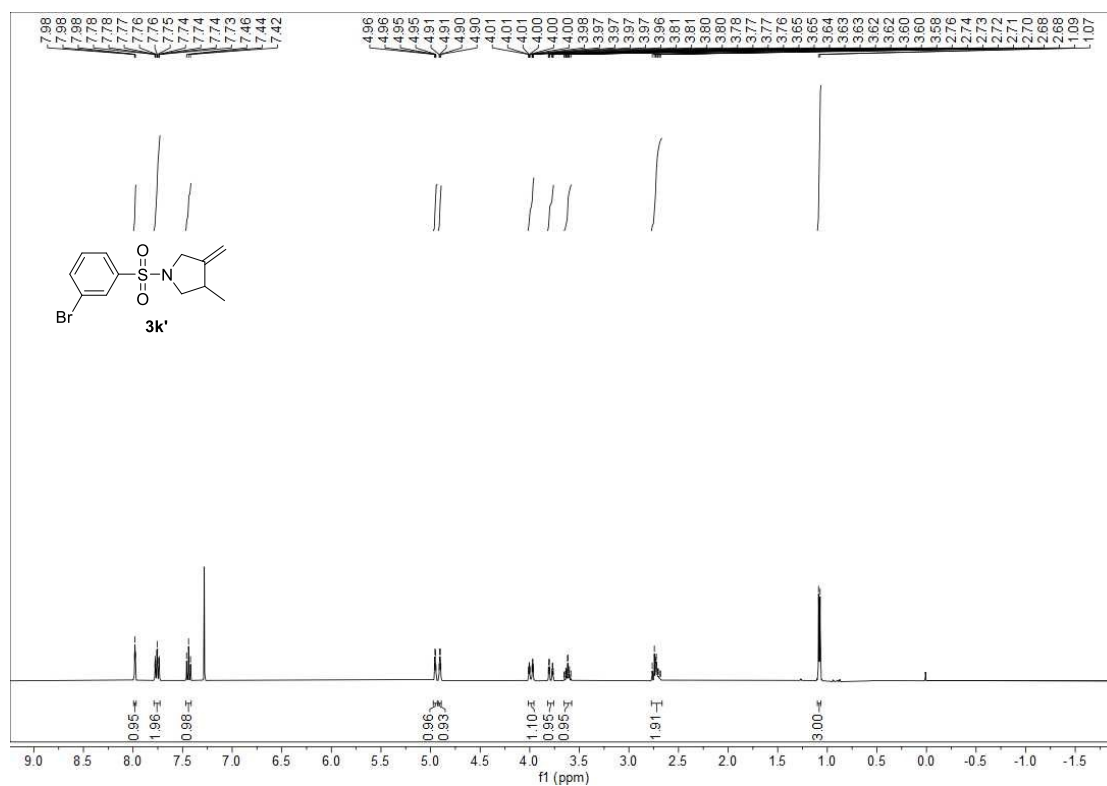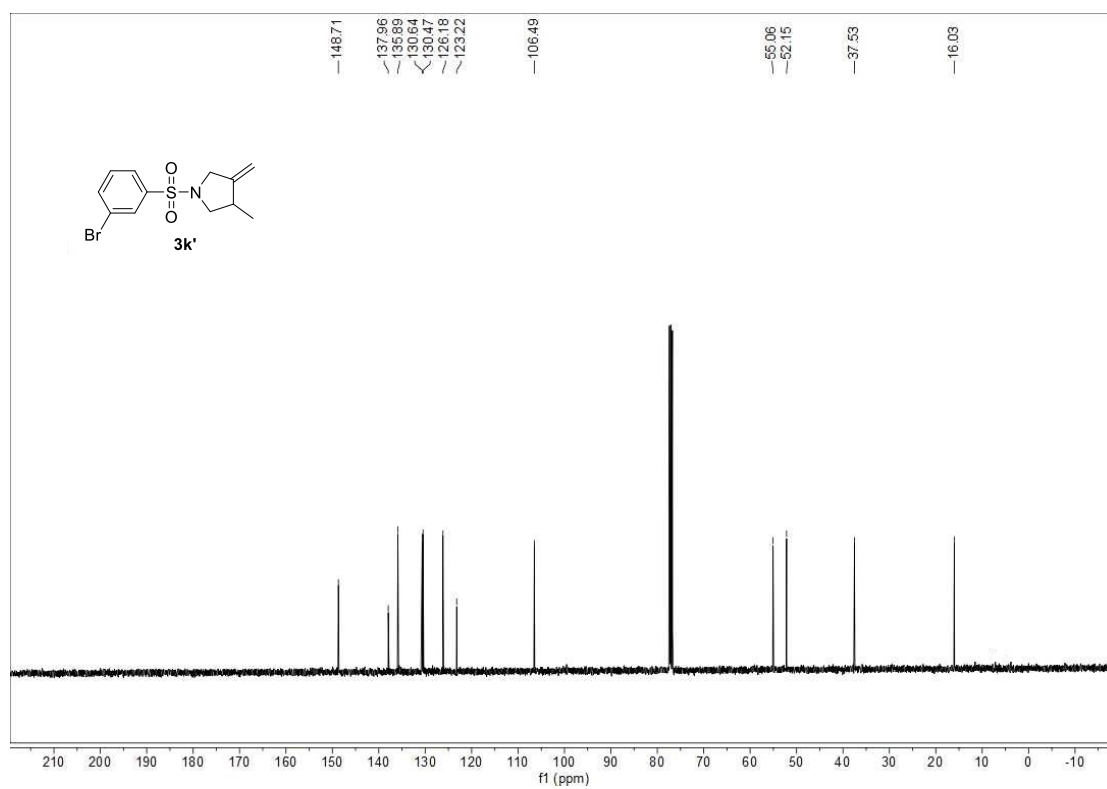

1-((3,4-difluorophenyl)sulfonyl)-3-methyl-4-methylenepyrrolidine (31')

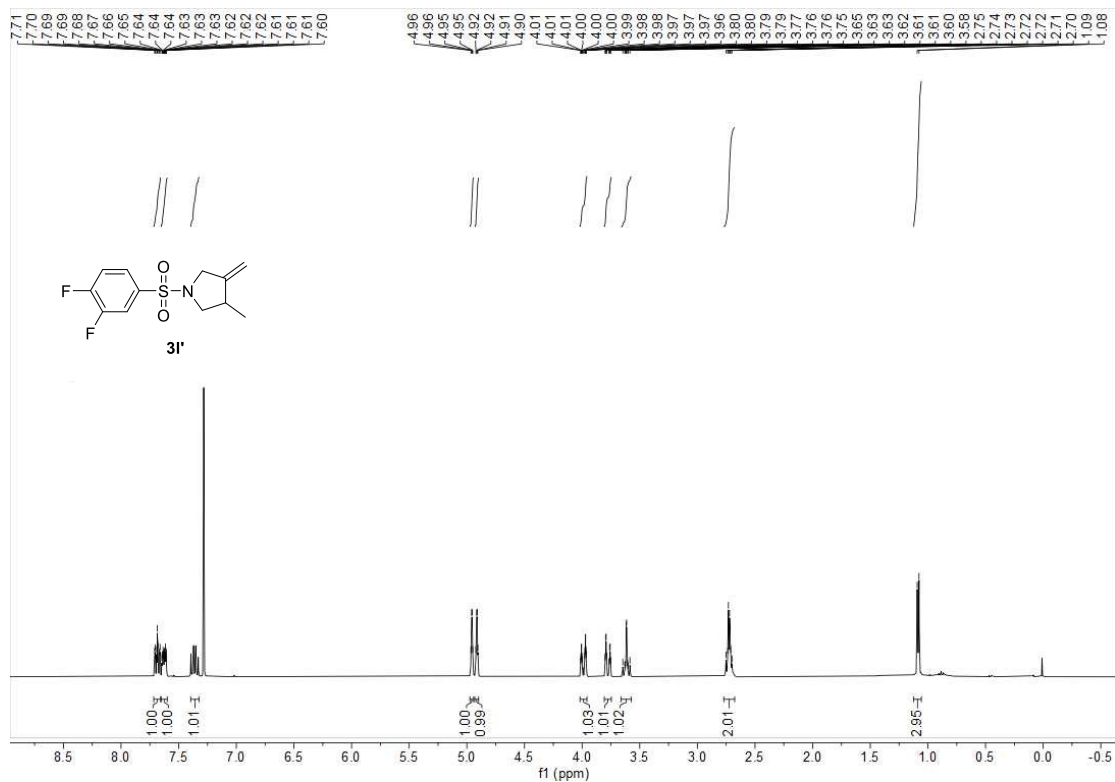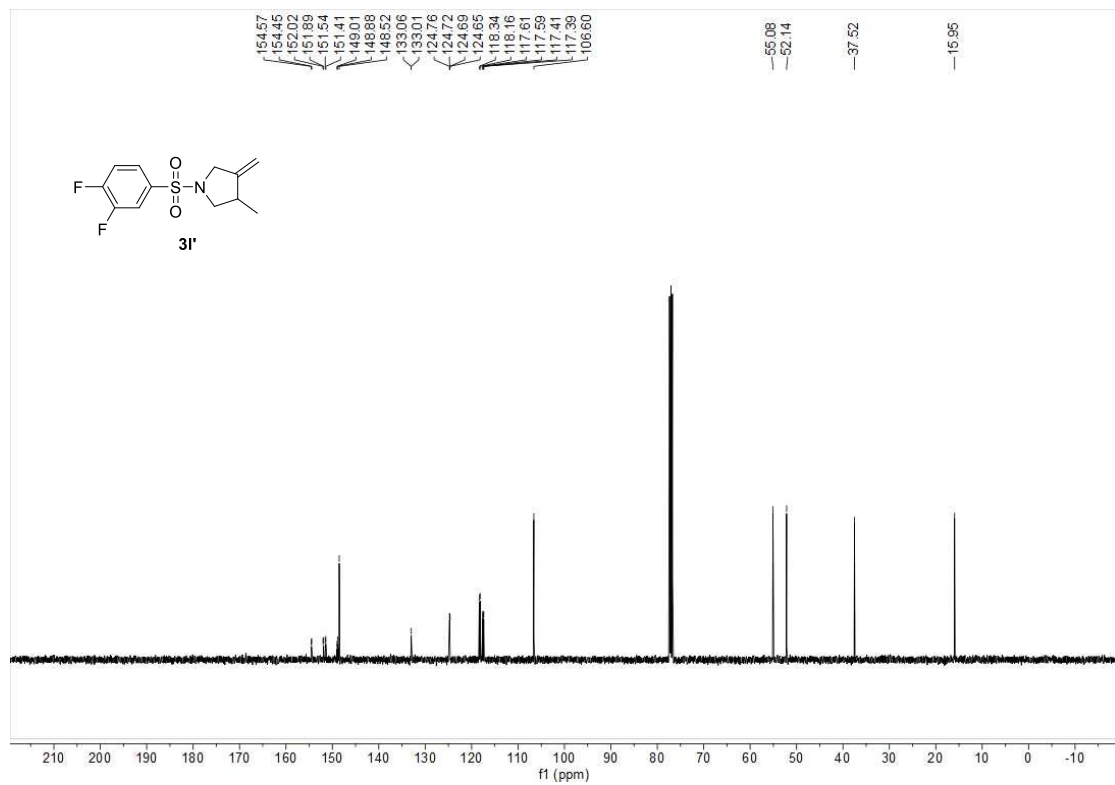



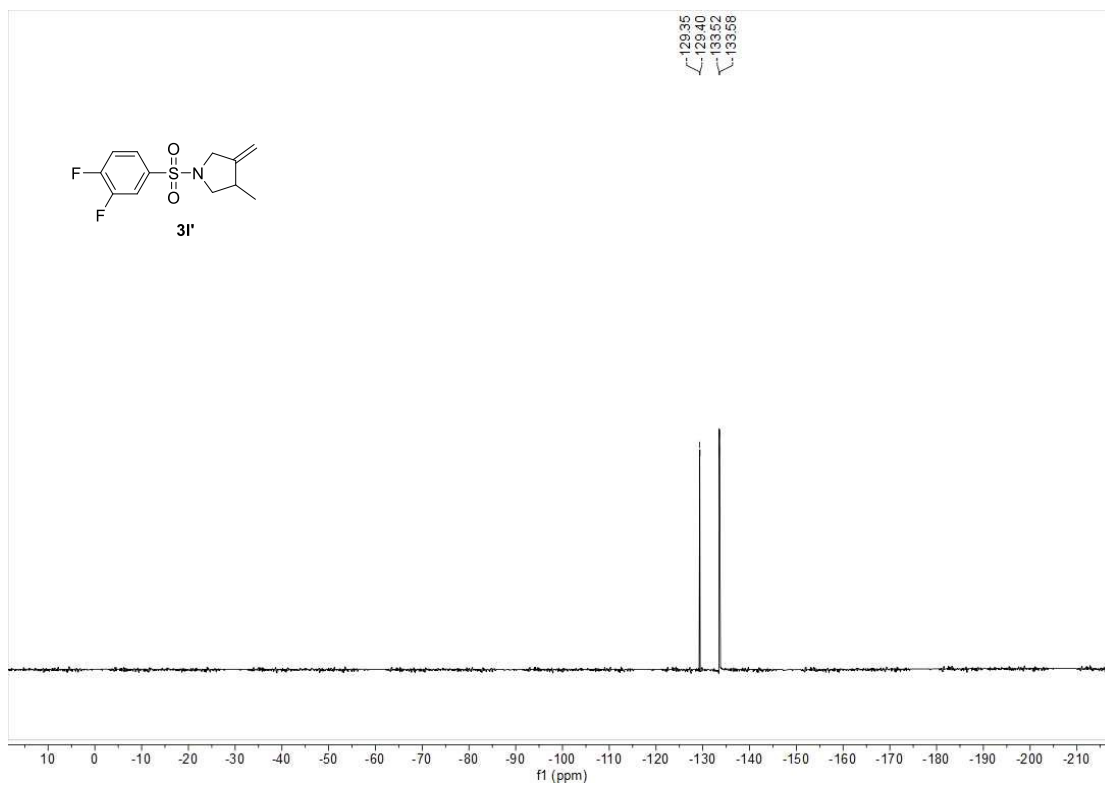

**1-((3,4-dimethoxyphenyl)sulfonyl)-3-methyl-4-methylenepyrrolidine (3m')**

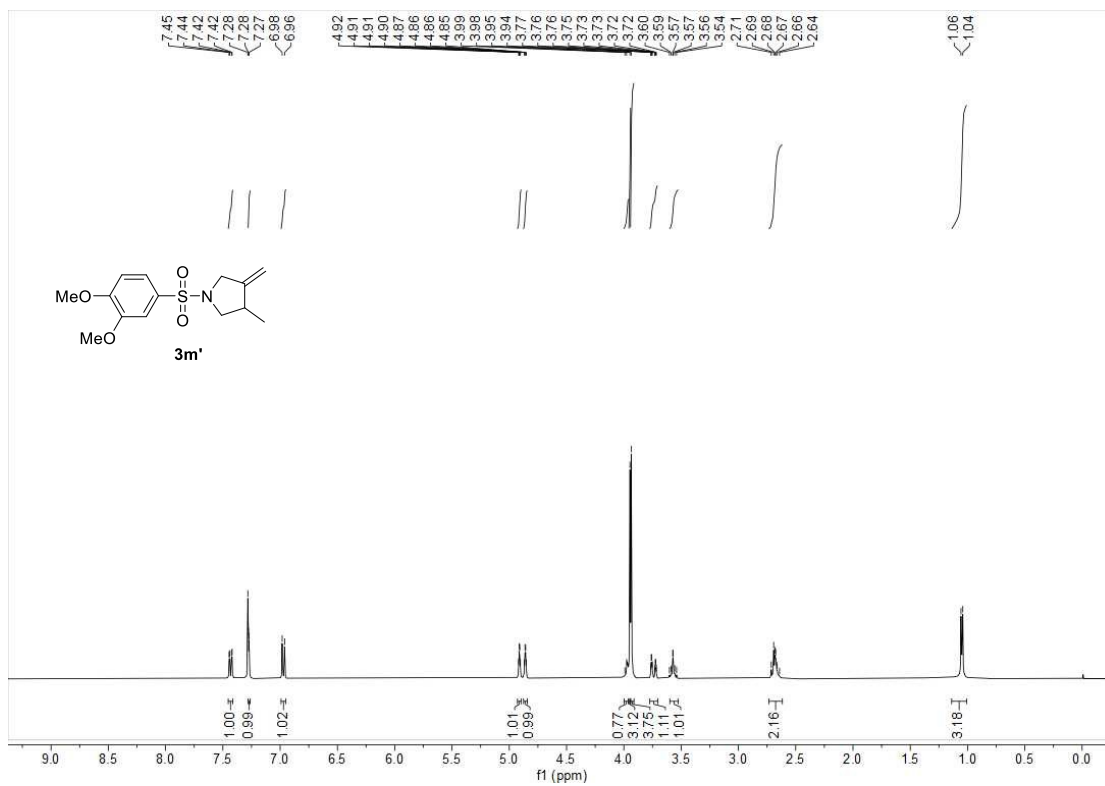

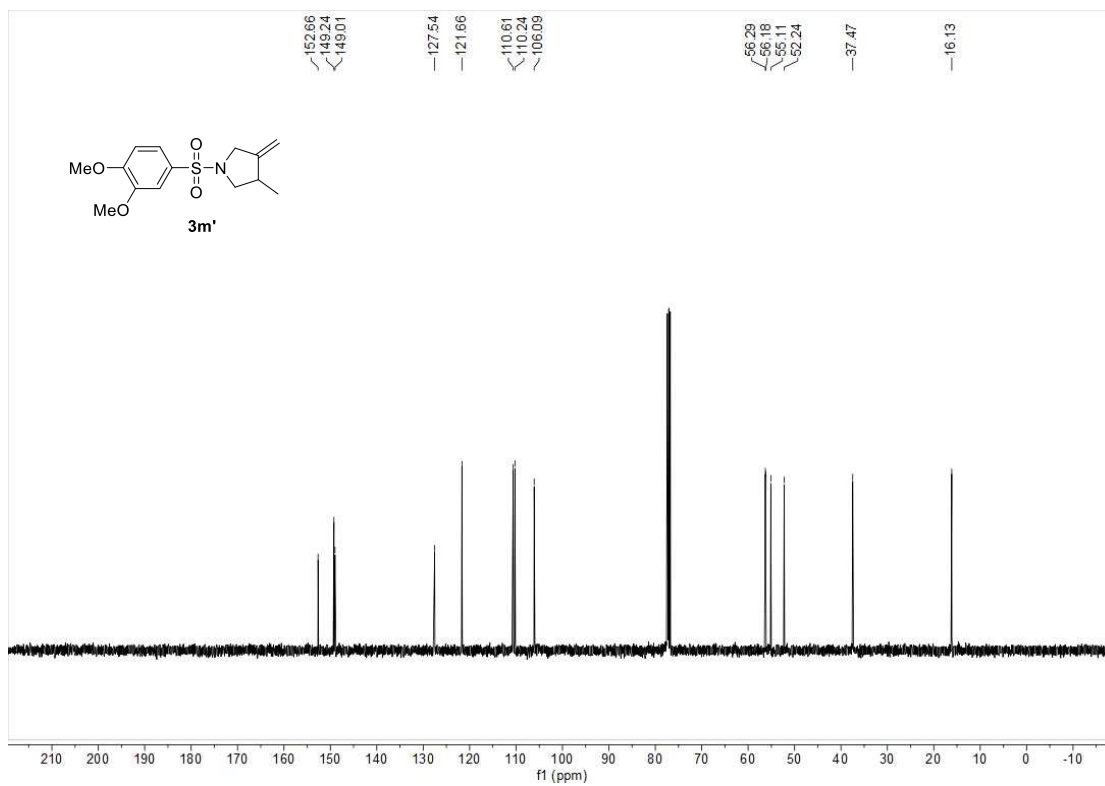

**3-methyl-4-methylene-1-(naphthalen-2-ylsulfonyl)pyrrolidine (3n')**

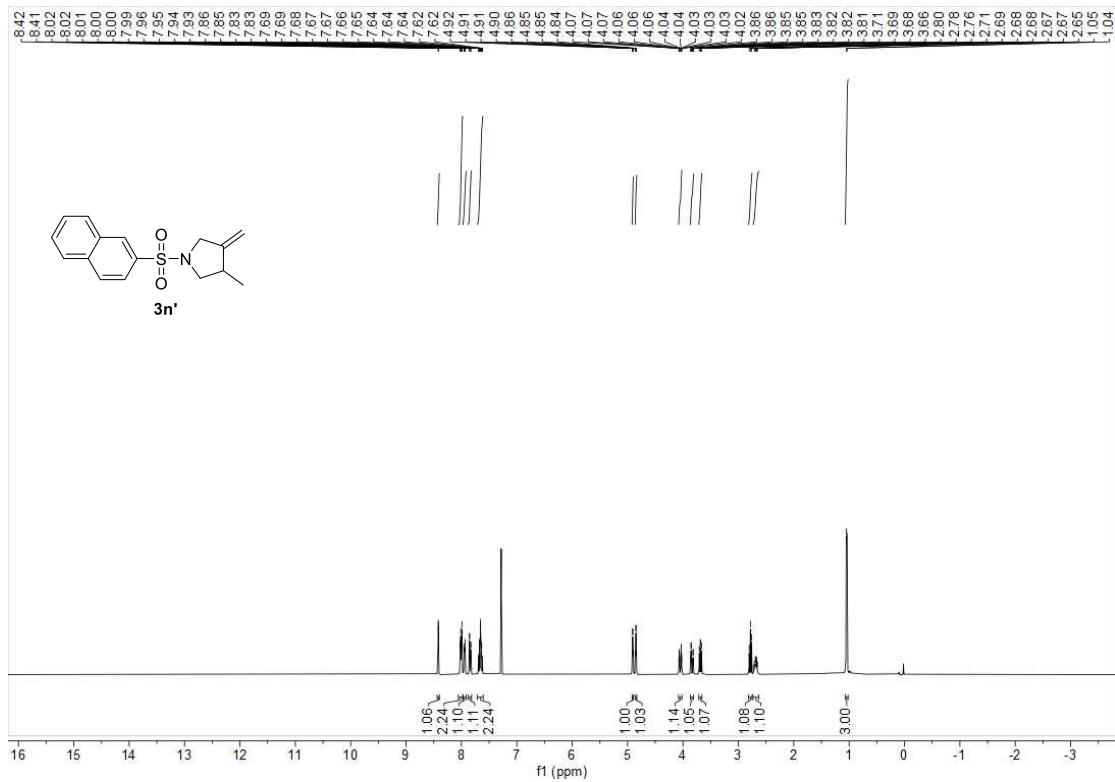

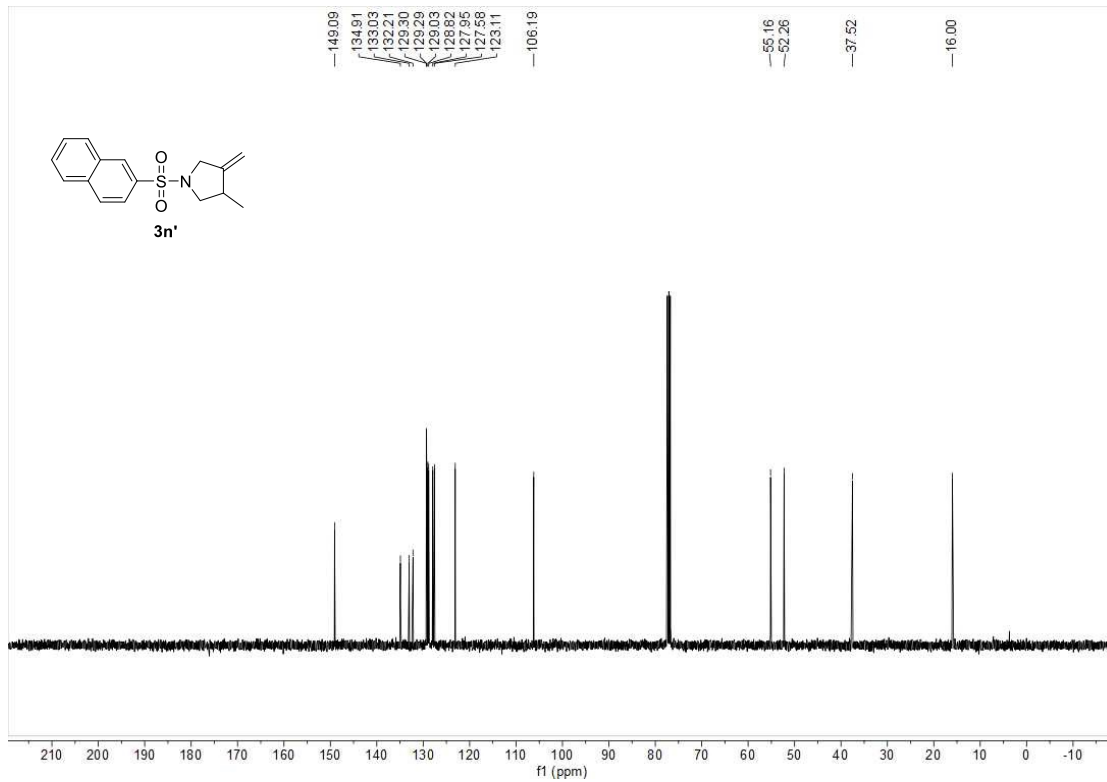

***N,N*-dimethyl-6-((3-methyl-4-methylenepyrrolidin-1-yl)sulfonyl)naphthalen-2-amine (3o')**

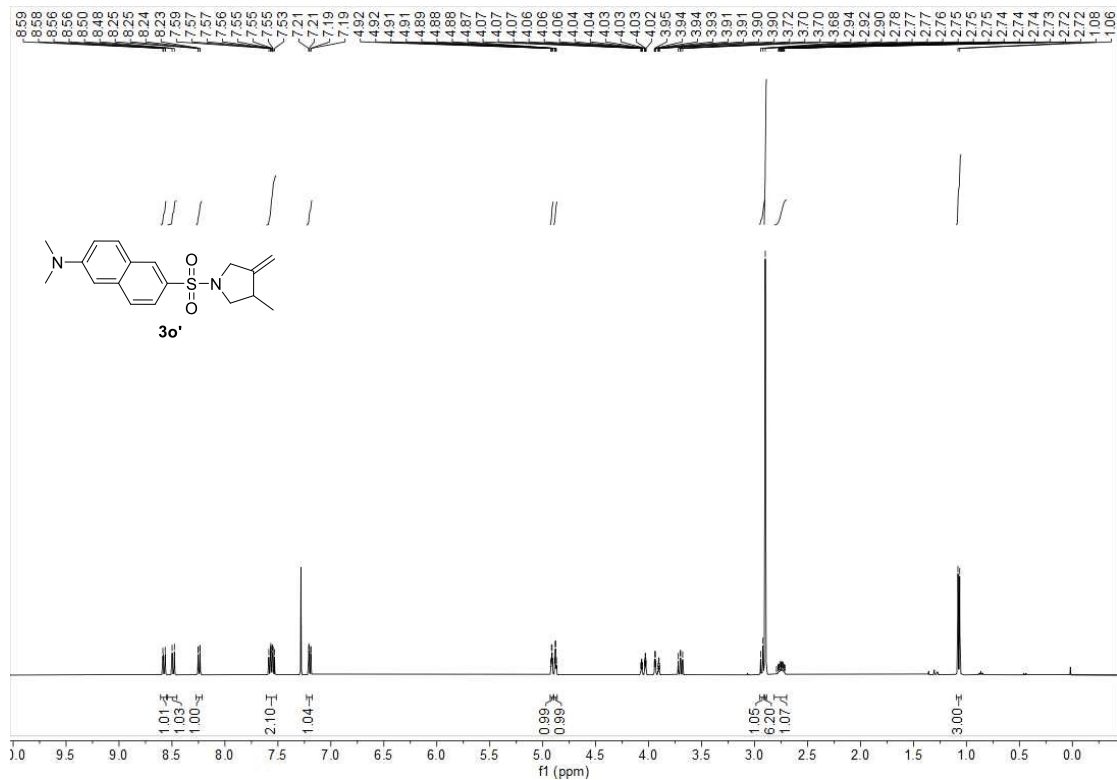

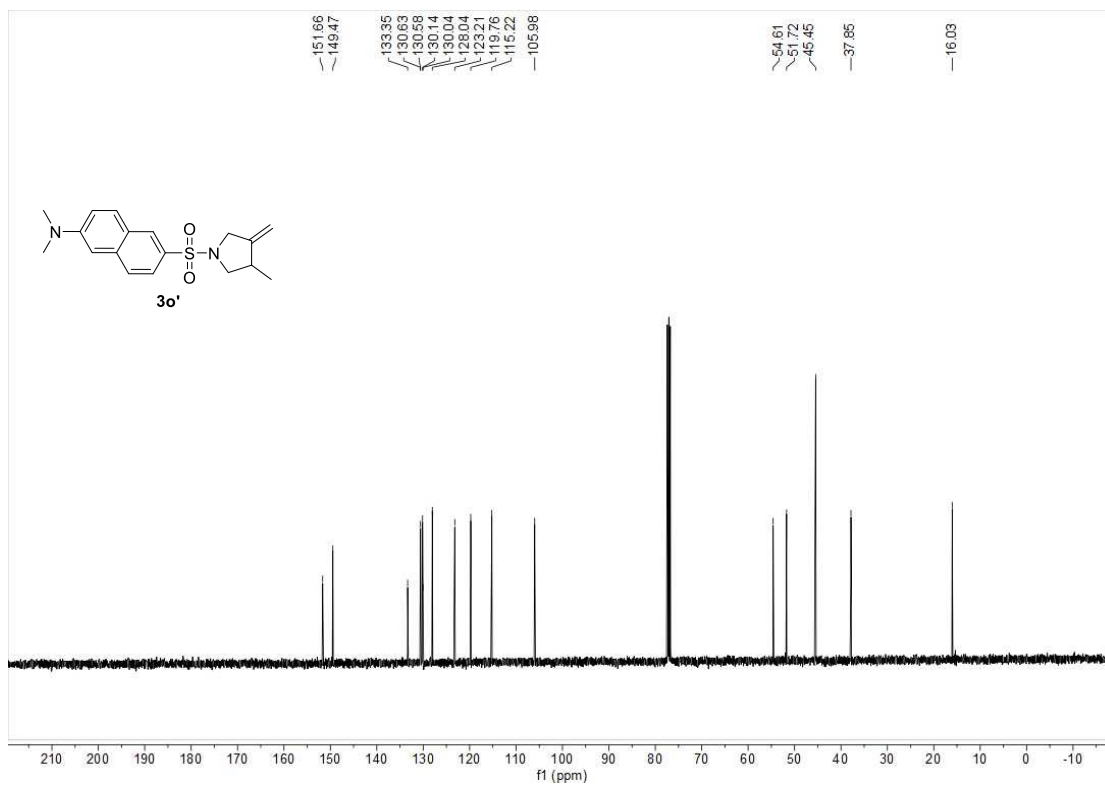

### 3-methyl-4-methylene-1-(thiophen-2-ylsulfonyl)pyrrolidine (3p')

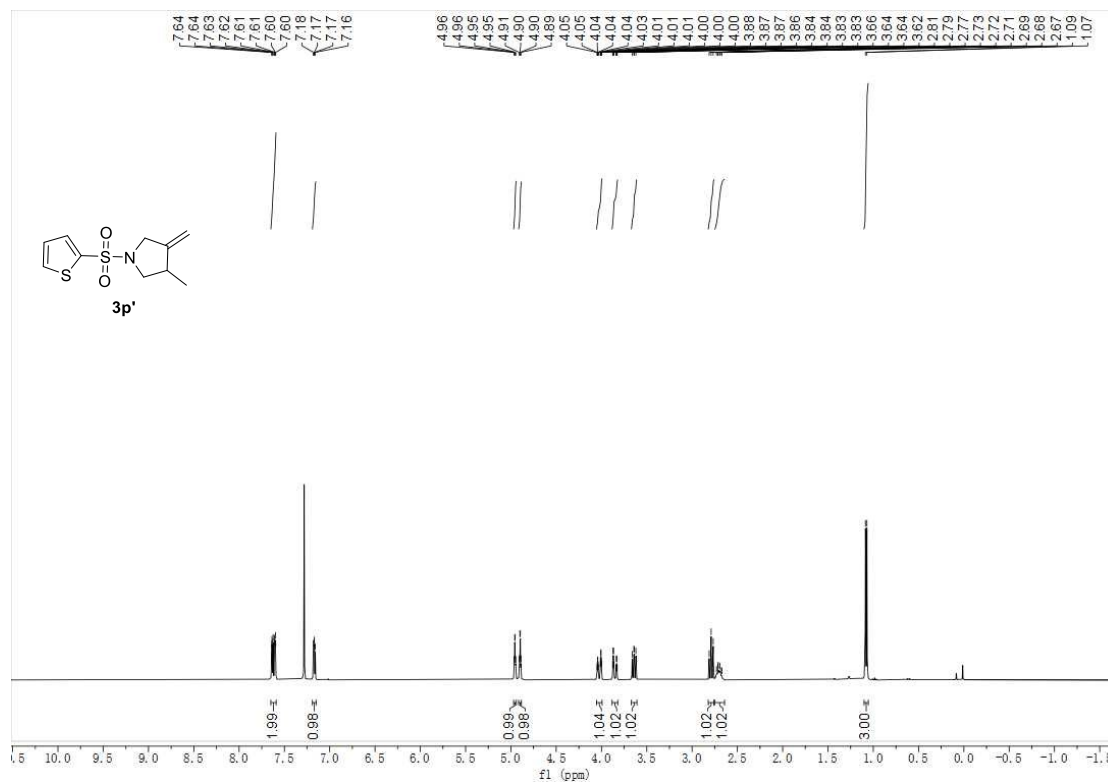

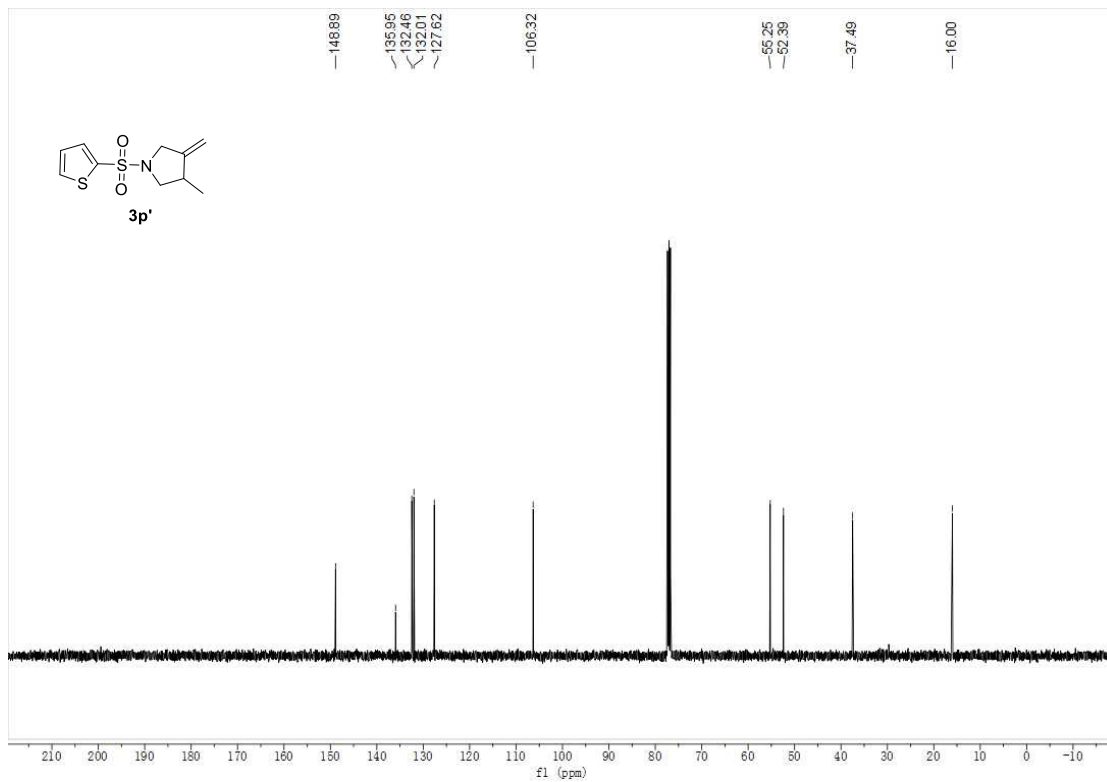

**3-((3-methyl-4-methylenepyrrolidin-1-yl)sulfonyl)pyridine (3q')**

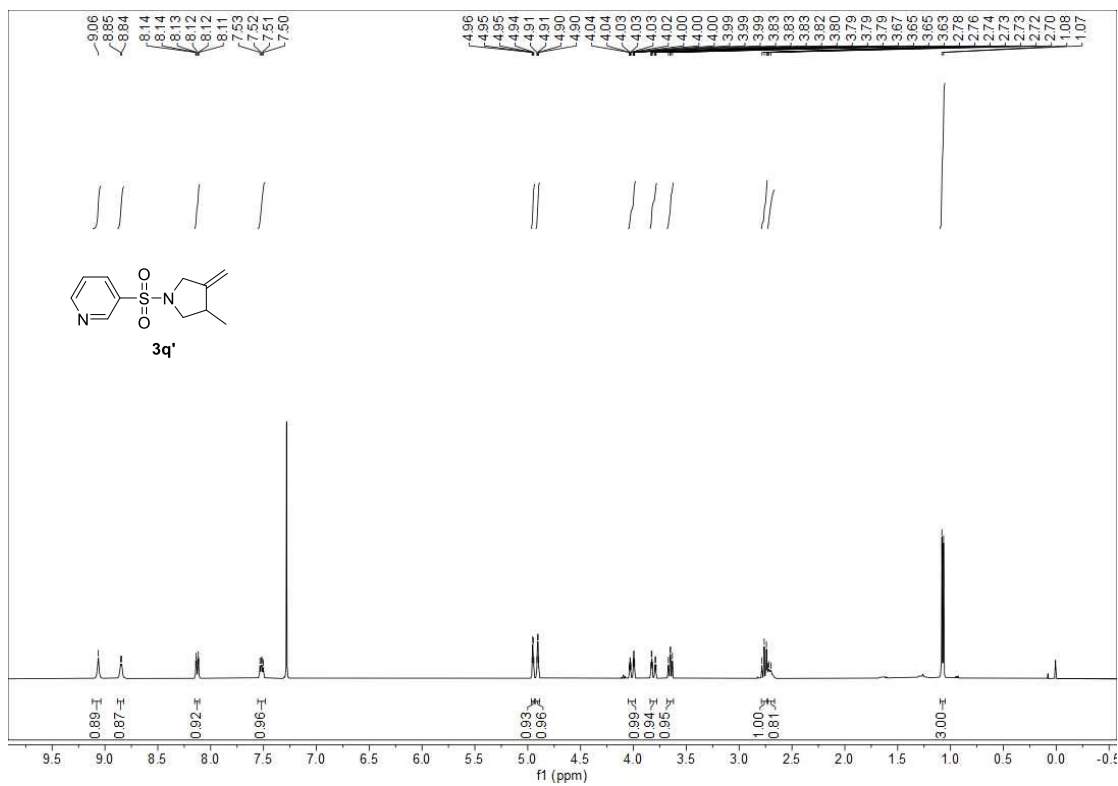

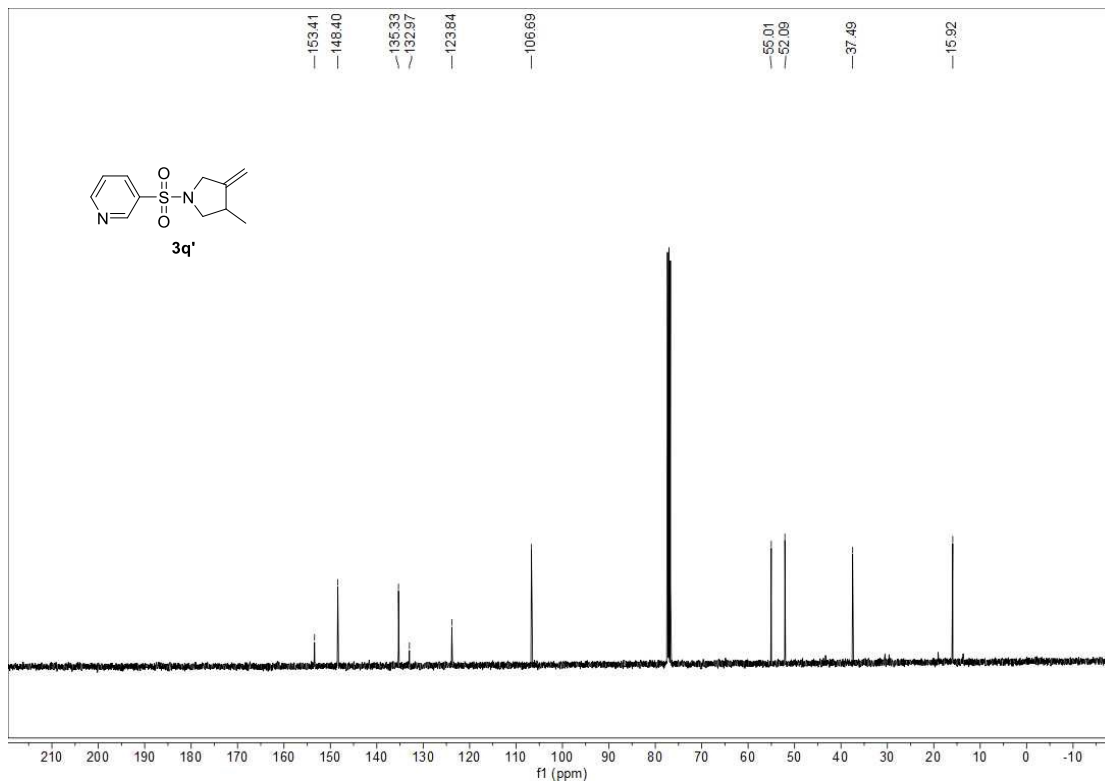

**3-methyl-4-methylene-1-(methylsulfonyl)pyrrolidine (3r')**

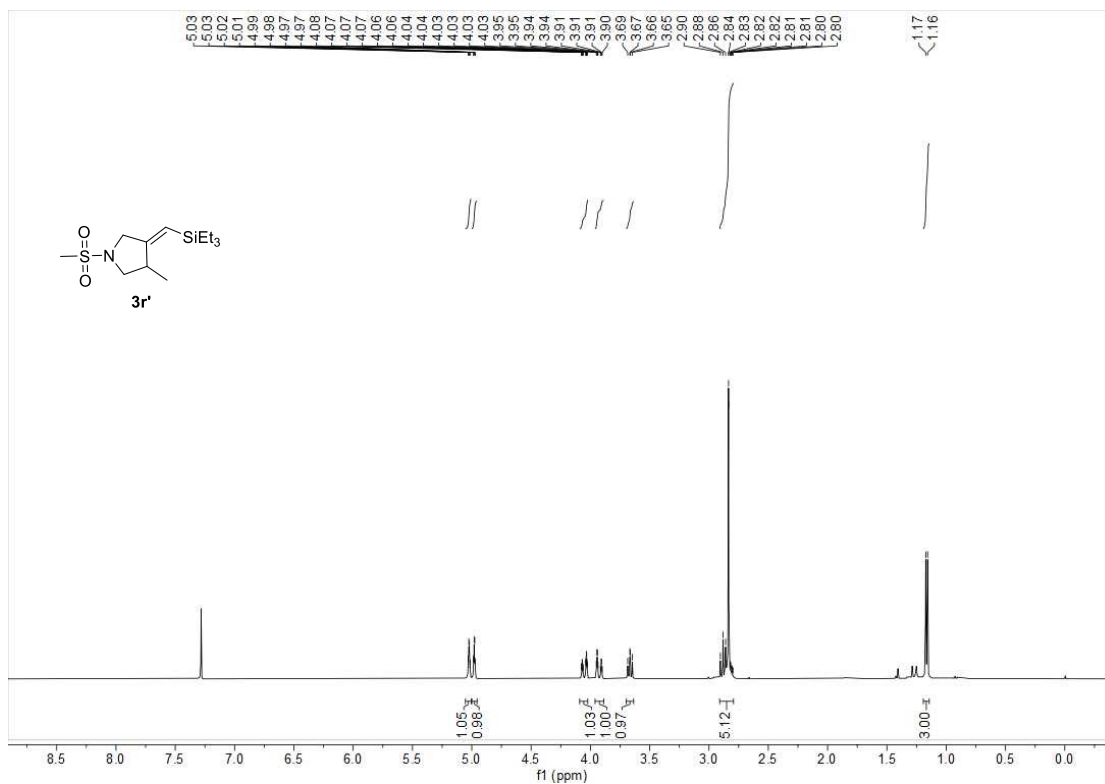

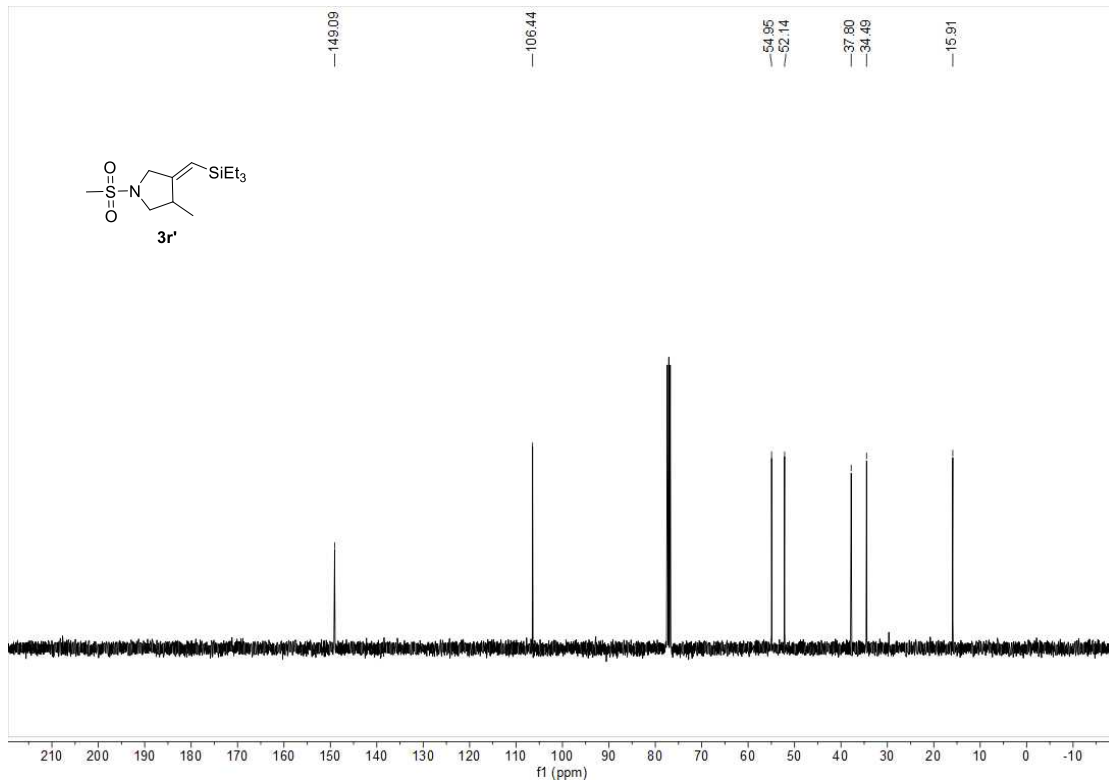

**1-(ethylsulfonyl)-3-methyl-4-methylenepyrrolidine (3s')**

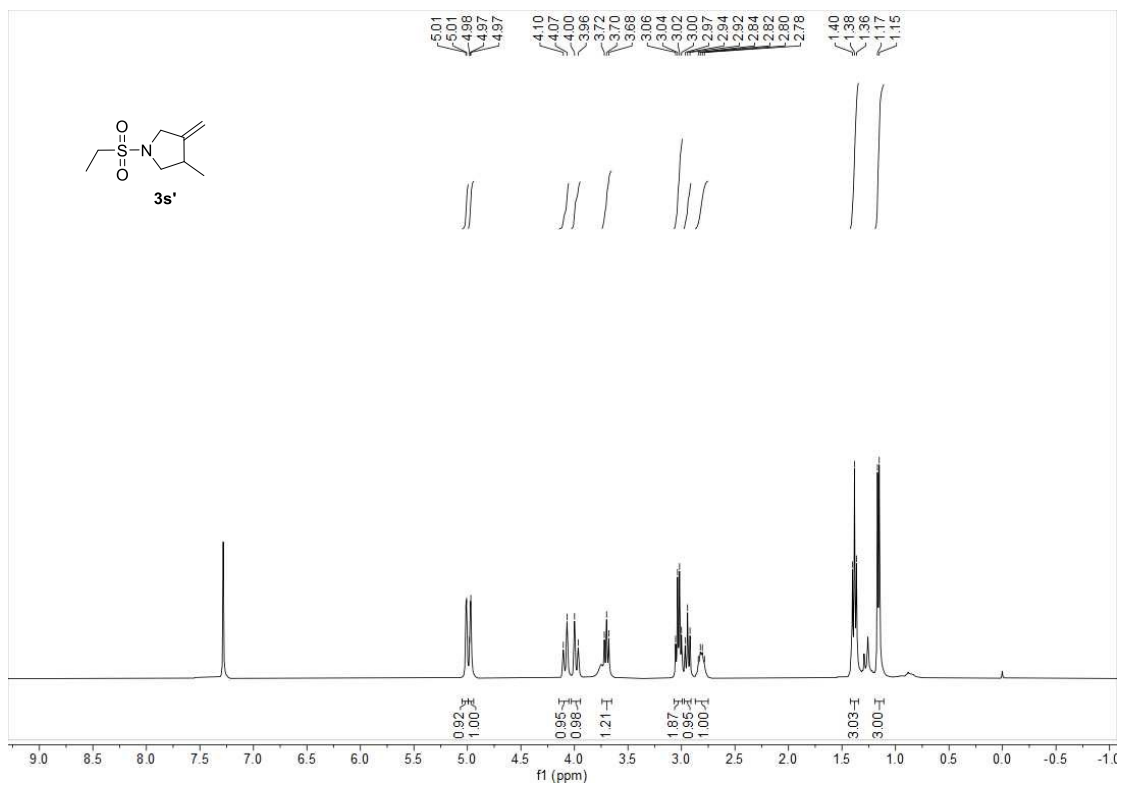

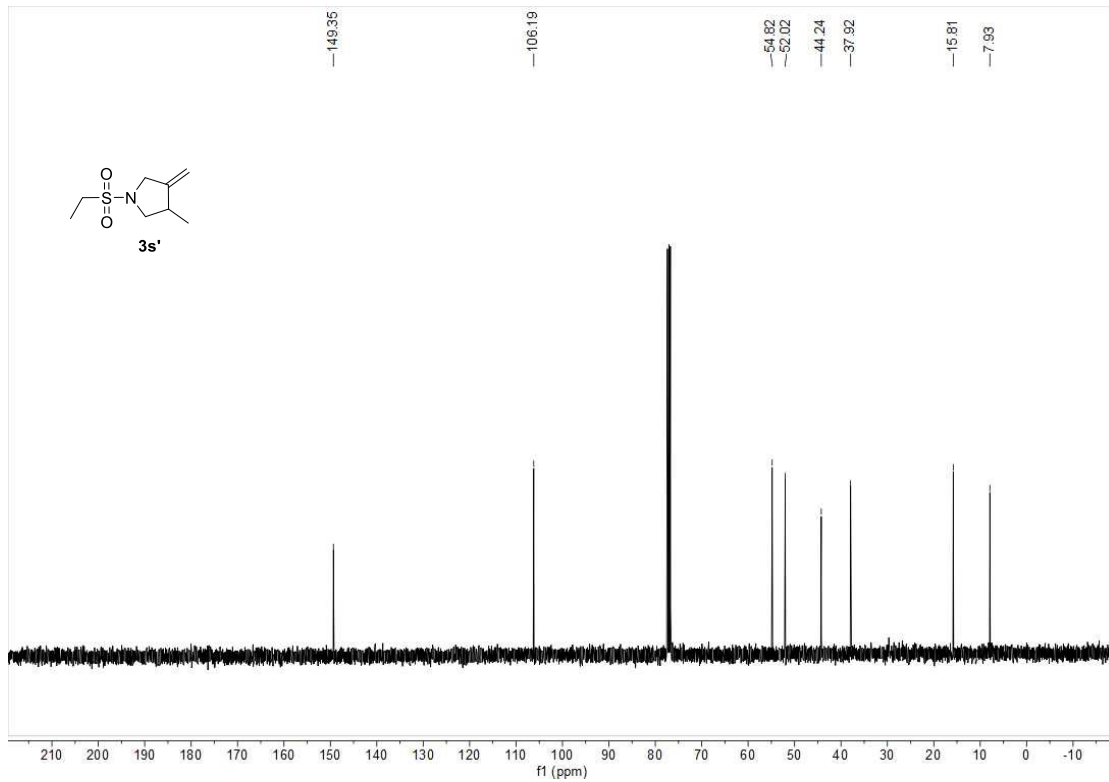

**1-(4-Toluenesulfonyl)-3-(Z)-ethylidene-4-methylpyrrolidine (3t')**

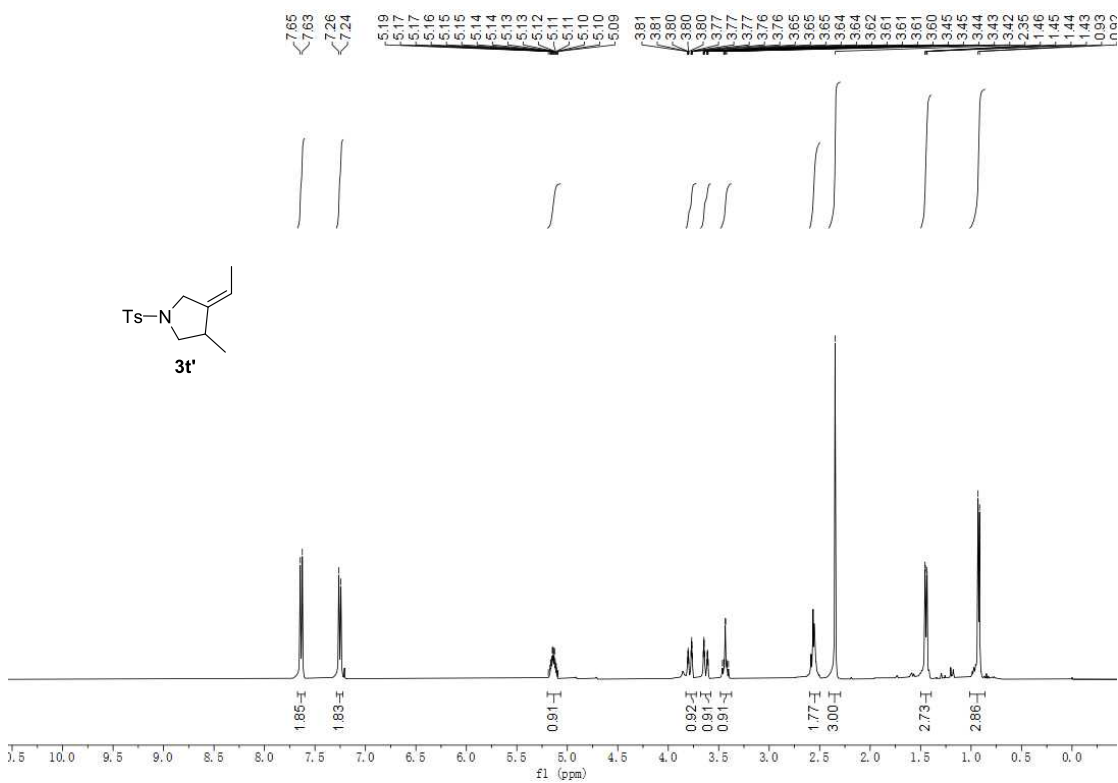



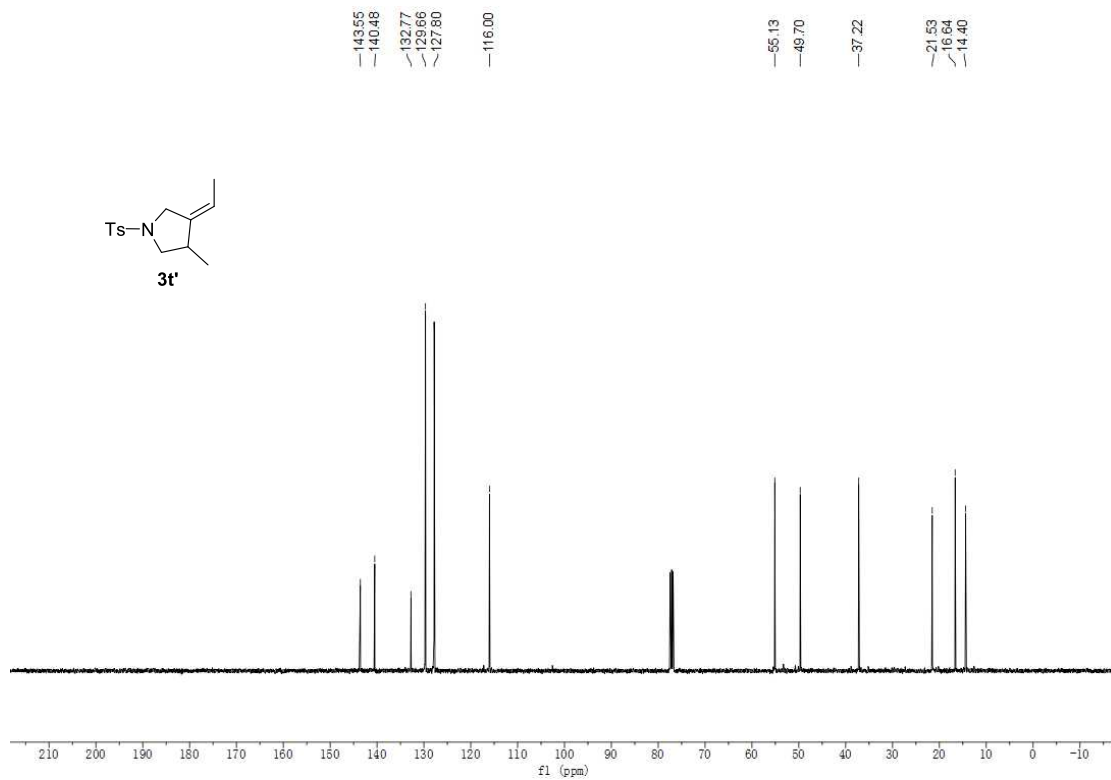

**4,4-Bis(ethoxycarbonyl)-1-methylidene-2-methyl-cyclopentane (3u')**

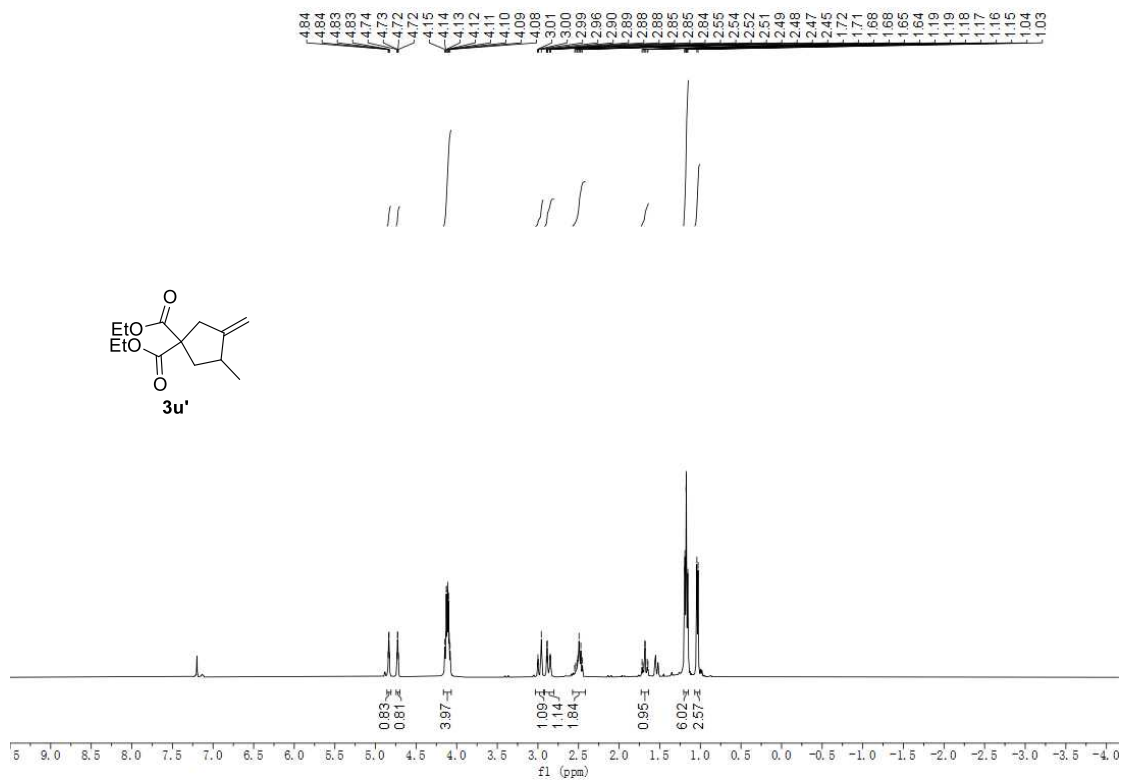

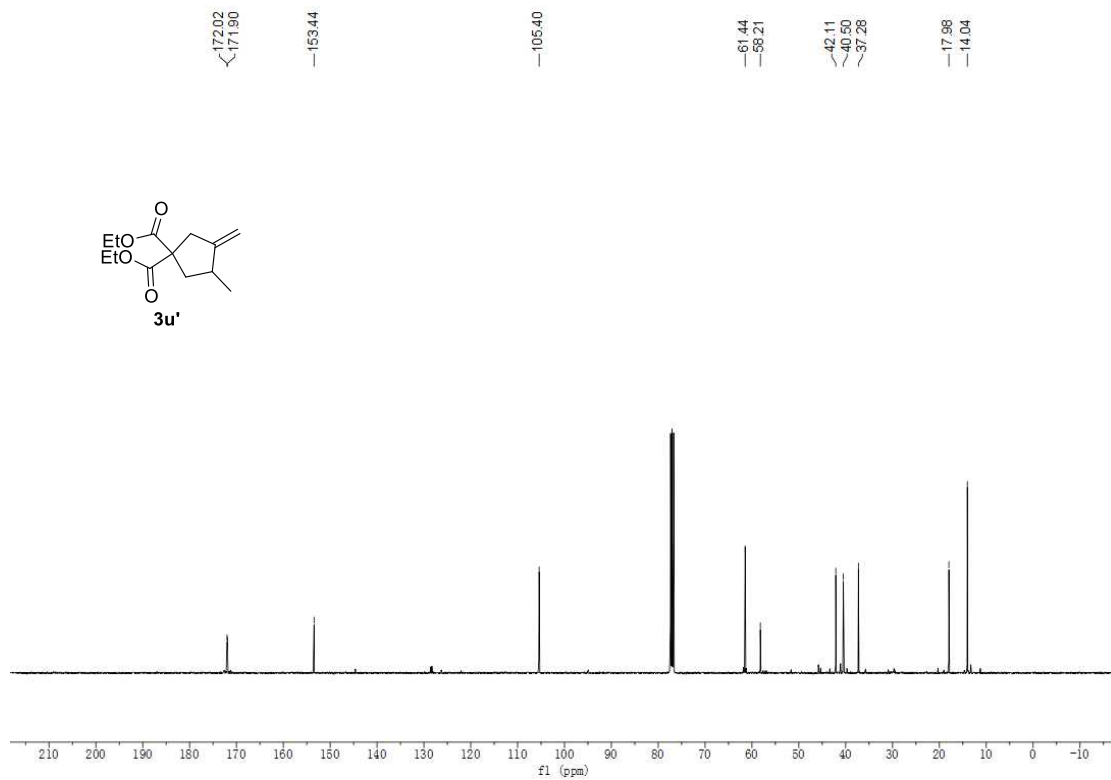

**(E)-3-benzylidene-4-methyl-1-tosylpyrrolidine (S14)**

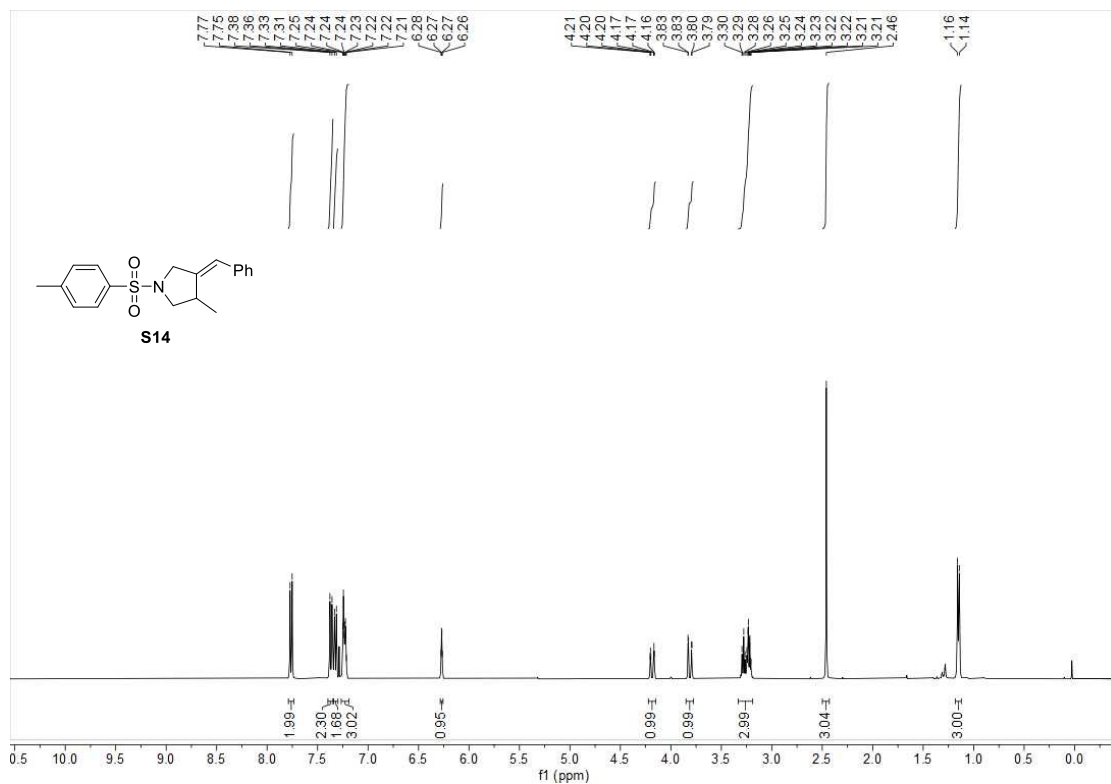

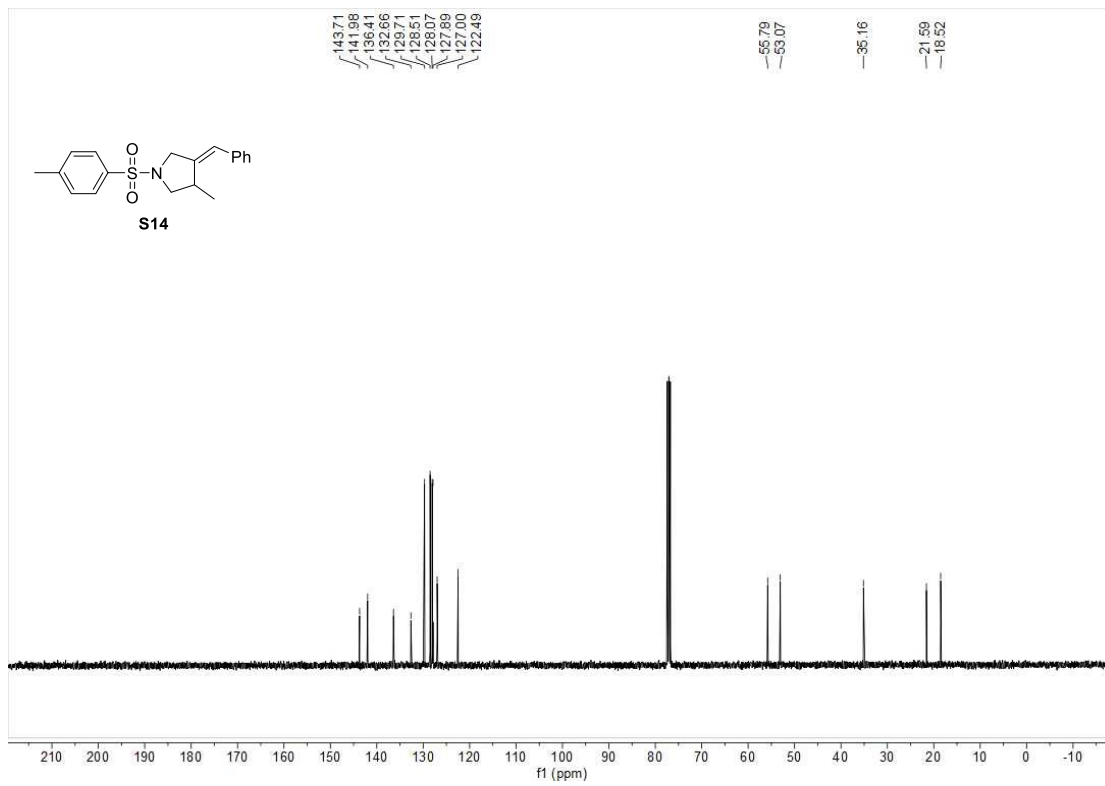

### 13. HPLC charts for the desilylated compounds.

#### 3-methyl-4-methylene-1-tosylpyrrolidine (3a')

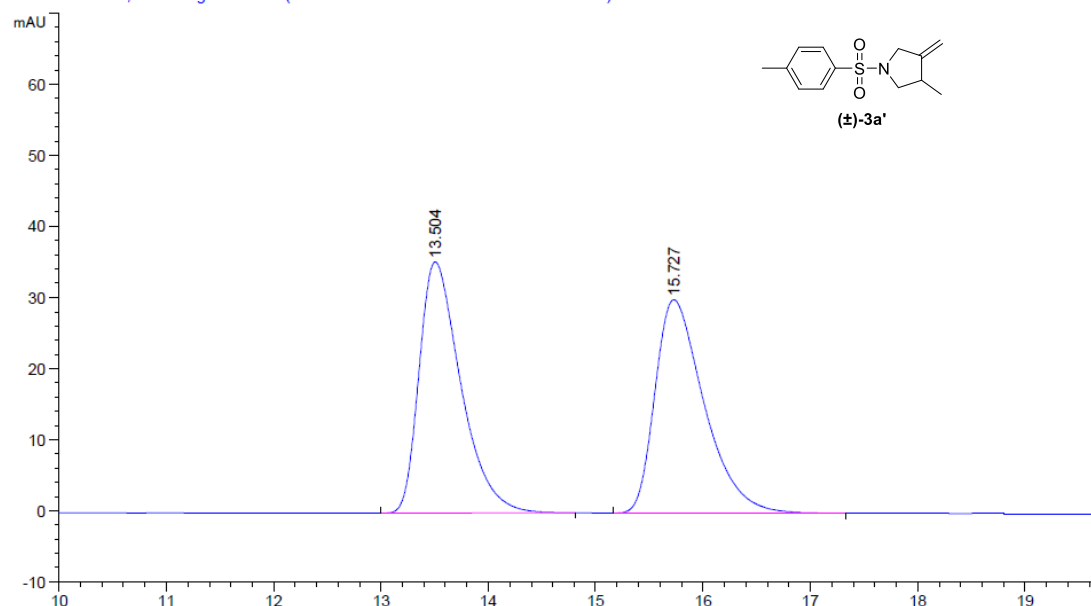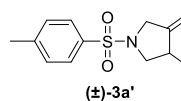

| Peak # | RetTime [min] | Type | Width [min] | Area [mAU*s] | Height [mAU] | Area %  |
|--------|---------------|------|-------------|--------------|--------------|---------|
| 1      | 13.504        | BB   | 0.4120      | 953.52020    | 35.31762     | 49.9459 |
| 2      | 15.727        | BB   | 0.4844      | 955.58545    | 30.02065     | 50.0541 |

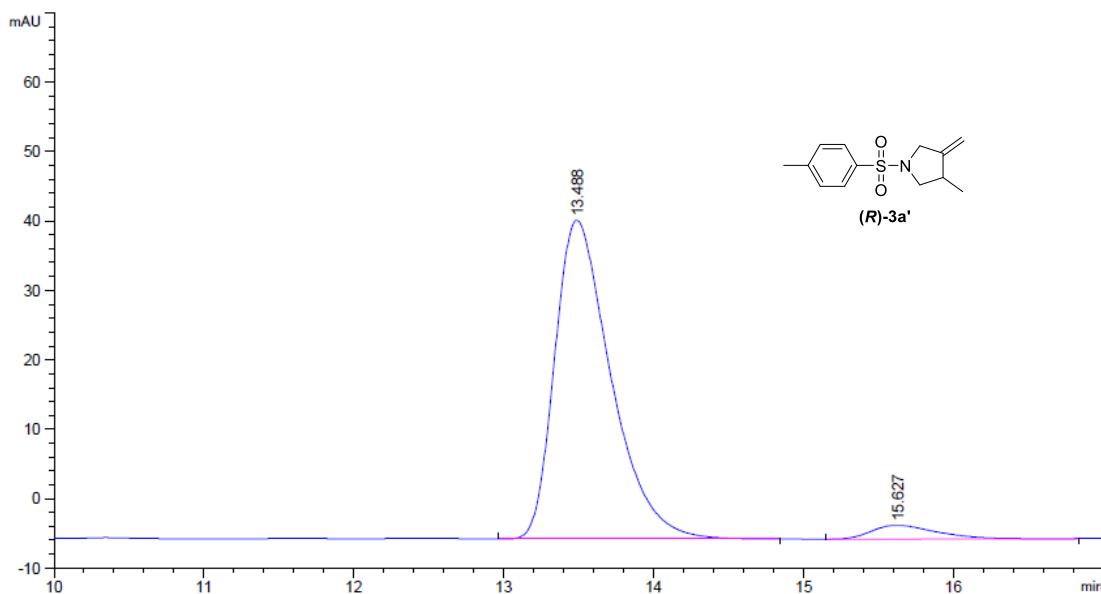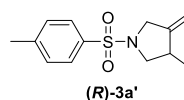

| Peak # | RetTime [min] | Type | Width [min] | Area [mAU*s] | Height [mAU] | Area %  |
|--------|---------------|------|-------------|--------------|--------------|---------|
| 1      | 13.488        | BB   | 0.3959      | 1195.50586   | 45.90158     | 95.2031 |
| 2      | 15.627        | BB   | 0.4453      | 60.23728     | 1.99462      | 4.7969  |

**3-methyl-4-methylene-1-(phenylsulfonyl)pyrrolidine (3b')**

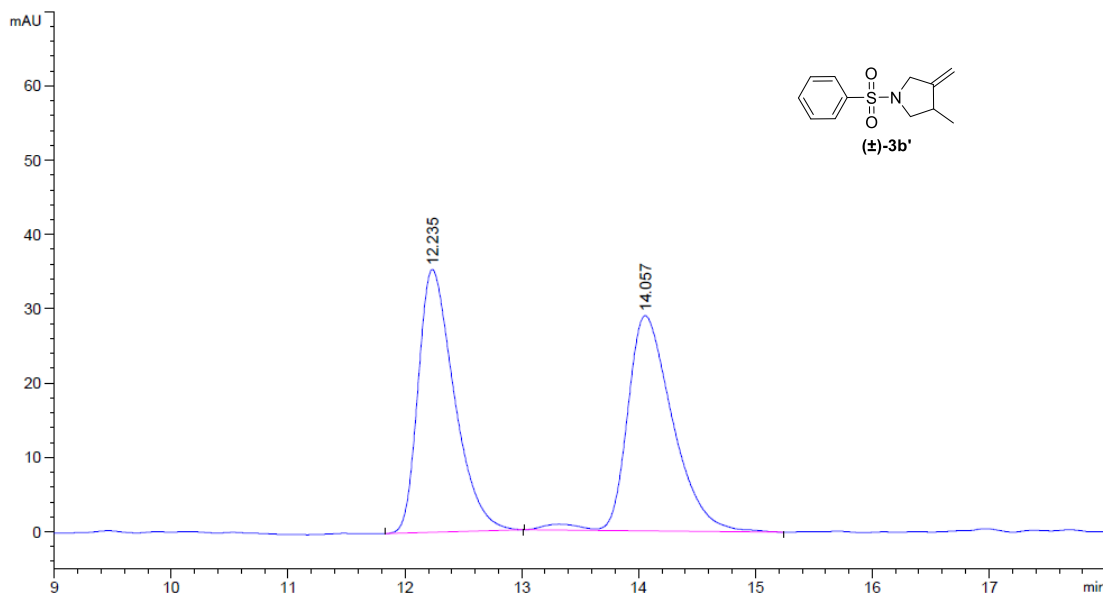

| Peak # | RetTime [min] | Type | Width [min] | Area [mAU*s] | Height [mAU] | Area %  |
|--------|---------------|------|-------------|--------------|--------------|---------|
| 1      | 12.235        | BB   | 0.3269      | 758.20026    | 35.39188     | 49.2659 |
| 2      | 14.057        | VB R | 0.4104      | 780.79572    | 28.97334     | 50.7341 |

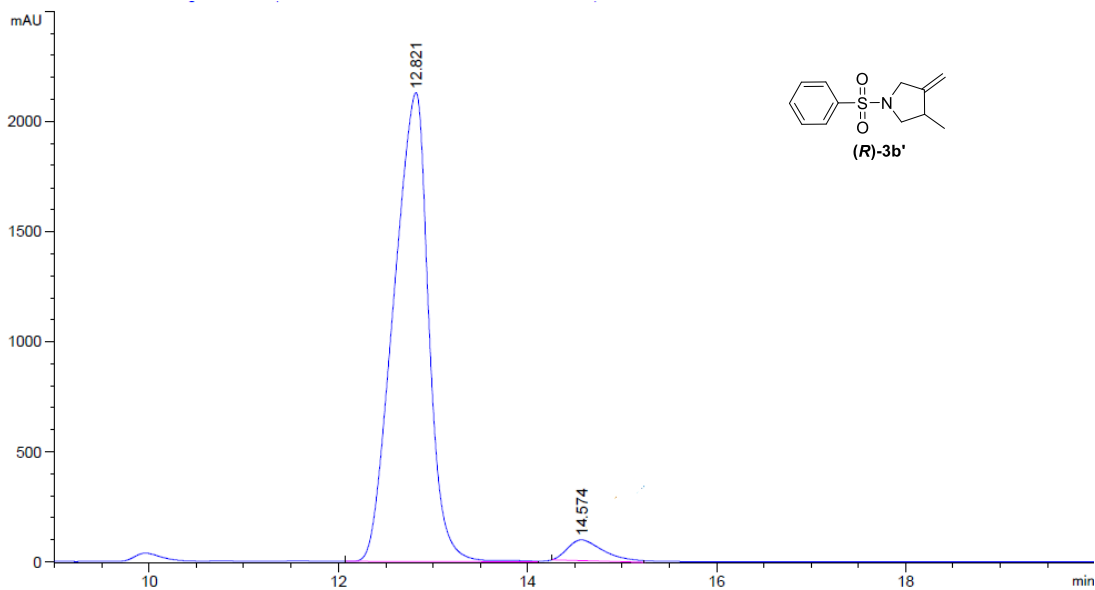

| Peak # | RetTime [min] | Type | Width [min] | Area [mAU*s] | Height [mAU] | Area %  |
|--------|---------------|------|-------------|--------------|--------------|---------|
| 1      | 12.821        | BV R | 0.4053      | 5.43749e4    | 2129.37427   | 95.6221 |
| 2      | 14.574        | MM   | 0.4421      | 2489.45972   | 93.84461     | 4.3779  |

1-((4-chlorophenyl)sulfonyl)-3-methyl-4-methylenepyrrolidine (3c')

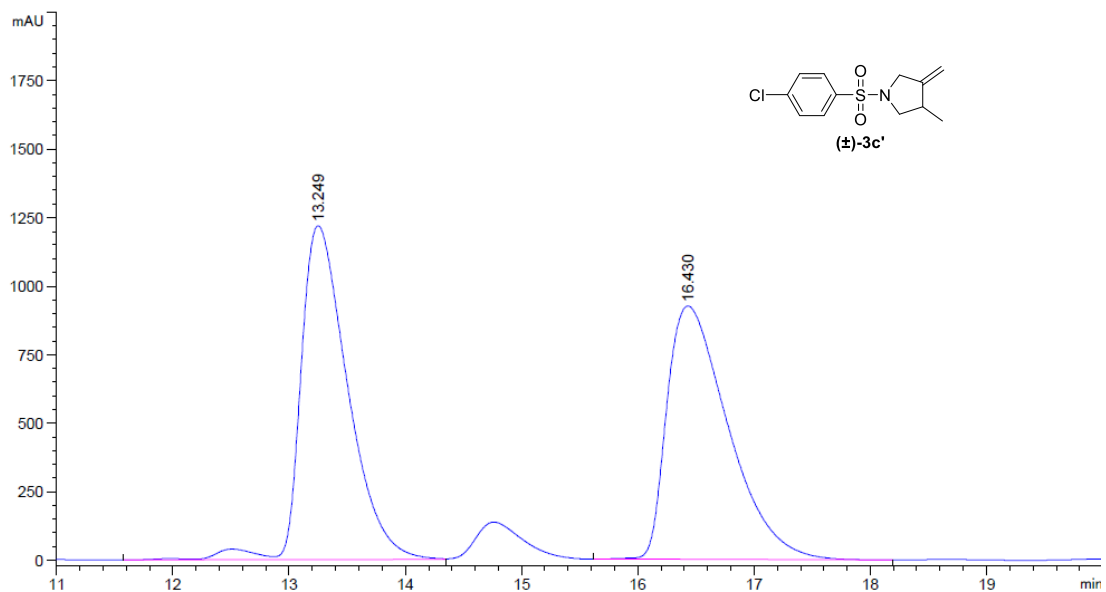

| Peak # | RetTime [min] | Type | Width [min] | Area [mAU*s] | Height [mAU] | Area %  |
|--------|---------------|------|-------------|--------------|--------------|---------|
| 1      | 13.249        | VV R | 0.4208      | 3.43861e4    | 1218.28674   | 50.3688 |
| 2      | 16.430        | BB   | 0.5637      | 3.38826e4    | 924.23279    | 49.6312 |

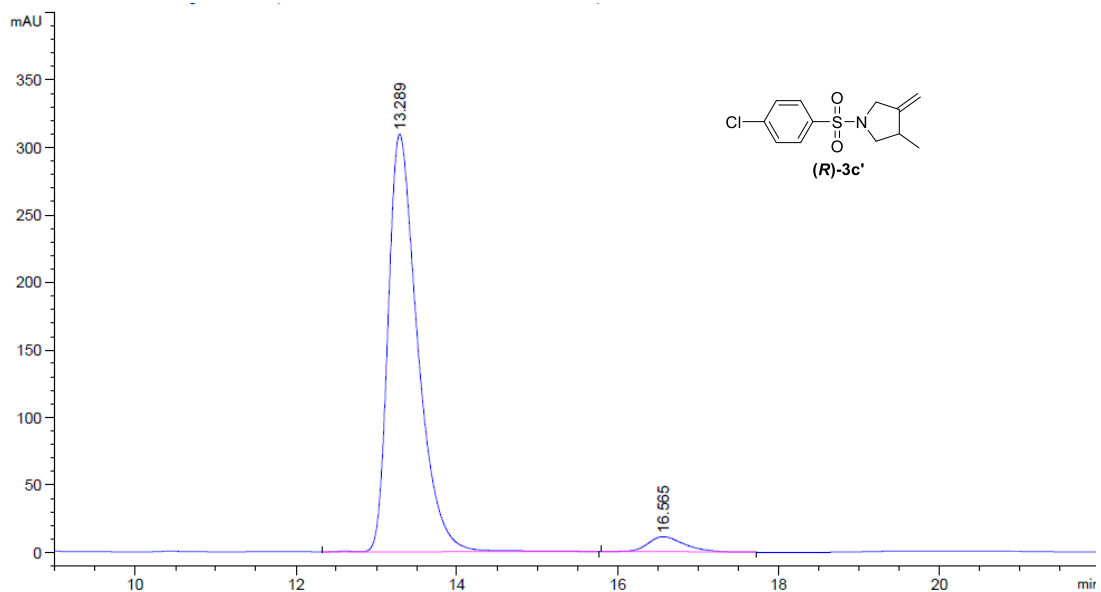

| Peak # | RetTime [min] | Type | Width [min] | Area [mAU*s] | Height [mAU] | Area %  |
|--------|---------------|------|-------------|--------------|--------------|---------|
| 1      | 13.289        | VB R | 0.3834      | 7855.53369   | 309.20459    | 95.7176 |
| 2      | 16.565        | BB   | 0.4711      | 351.45804    | 11.20060     | 4.2824  |

**1-([1,1'-biphenyl]-4-ylsulfonyl)-3-methyl-4-methylenepyrrolidine (3d')**

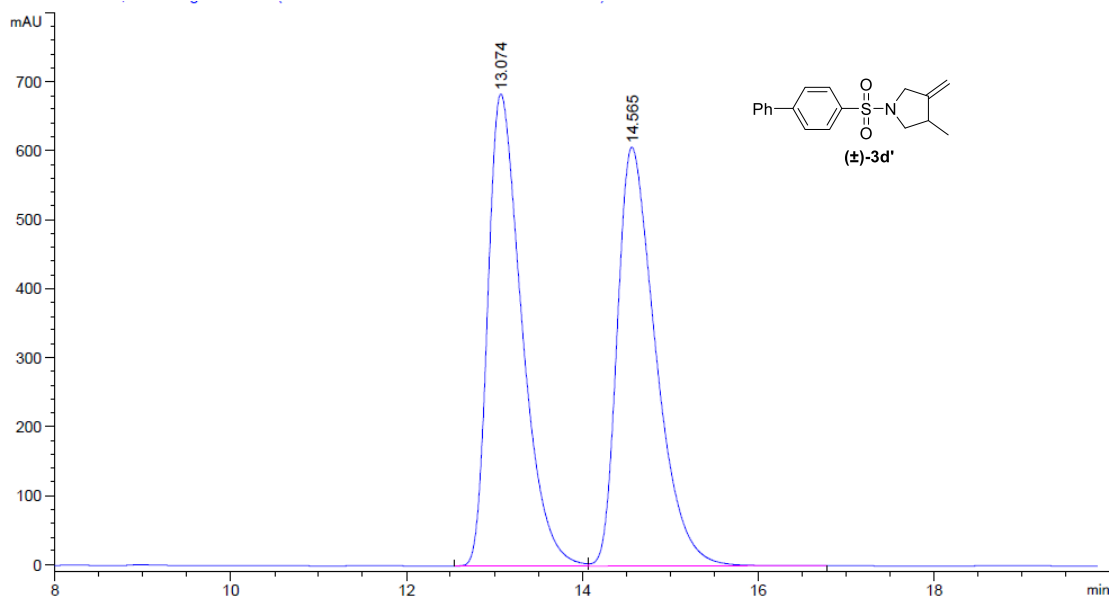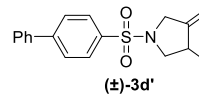

| Peak # | RetTime [min] | Type | Width [min] | Area [mAU*s] | Height [mAU] | Area %  |
|--------|---------------|------|-------------|--------------|--------------|---------|
| 1      | 13.074        | BV   | 0.4097      | 1.83290e4    | 683.88898    | 49.9142 |
| 2      | 14.565        | VB   | 0.4667      | 1.83920e4    | 606.72156    | 50.0858 |

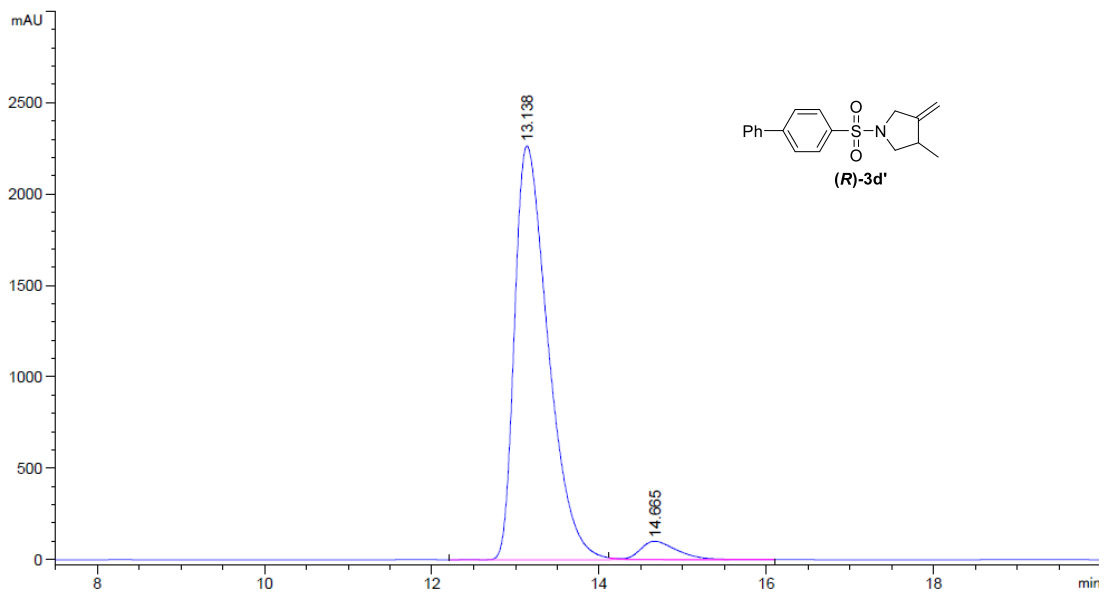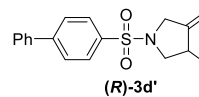

| Peak # | RetTime [min] | Type | Width [min] | Area [mAU*s] | Height [mAU] | Area %  |
|--------|---------------|------|-------------|--------------|--------------|---------|
| 1      | 13.138        | VV R | 0.4274      | 6.31682e4    | 2264.83057   | 95.3583 |
| 2      | 14.665        | VB E | 0.4605      | 3074.81201   | 100.90148    | 4.6417  |

1-((4-methoxyphenyl)sulfonyl)-3-methyl-4-methylenepyrrolidine (3e')

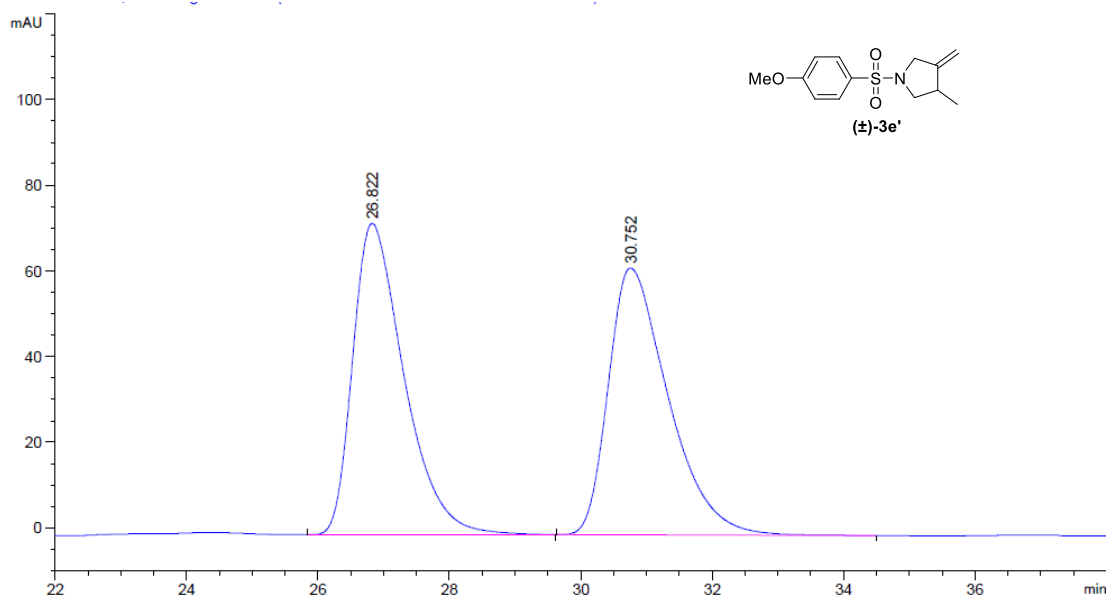

| Peak # | RetTime [min] | Type | Width [min] | Area [mAU*s] | Height [mAU] | Area %  |
|--------|---------------|------|-------------|--------------|--------------|---------|
| 1      | 26.822        | BB   | 0.8241      | 3936.45728   | 72.66045     | 49.9422 |
| 2      | 30.752        | BB   | 0.9303      | 3945.56958   | 62.26105     | 50.0578 |

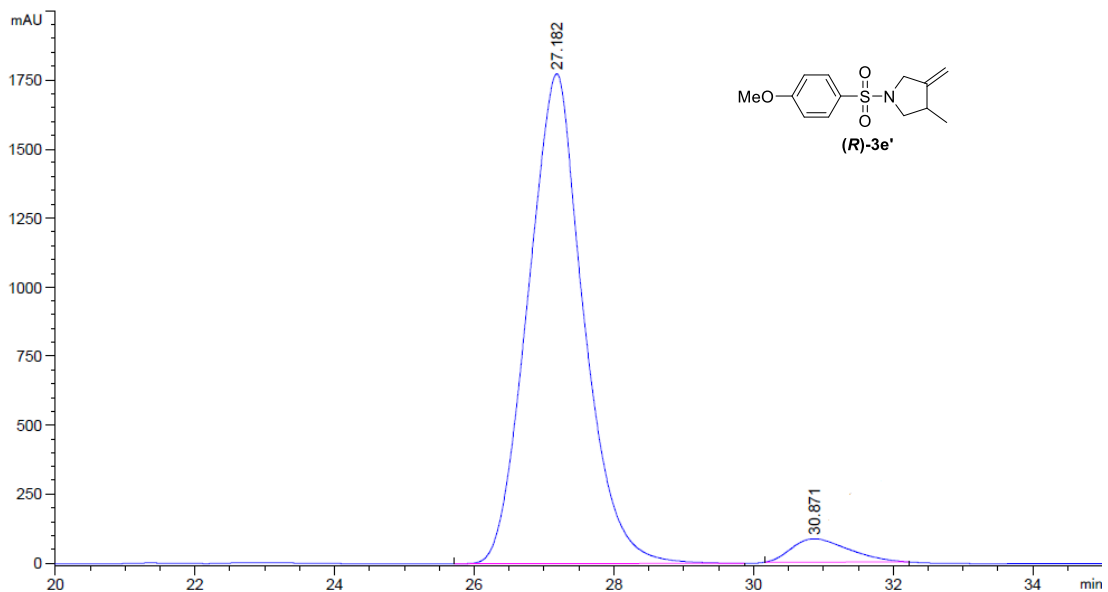

| Peak # | RetTime [min] | Type | Width [min] | Area [mAU*s] | Height [mAU] | Area %  |
|--------|---------------|------|-------------|--------------|--------------|---------|
| 1      | 27.182        | BB   | 0.8178      | 9.78740e4    | 1773.73535   | 95.3008 |
| 2      | 30.871        | MM   | 0.9494      | 4826.10449   | 84.72484     | 4.6992  |



**3-methyl-4-methylene-1-((4-(trifluoromethoxy)phenyl)sulfonyl)pyrrolidine (3f')**

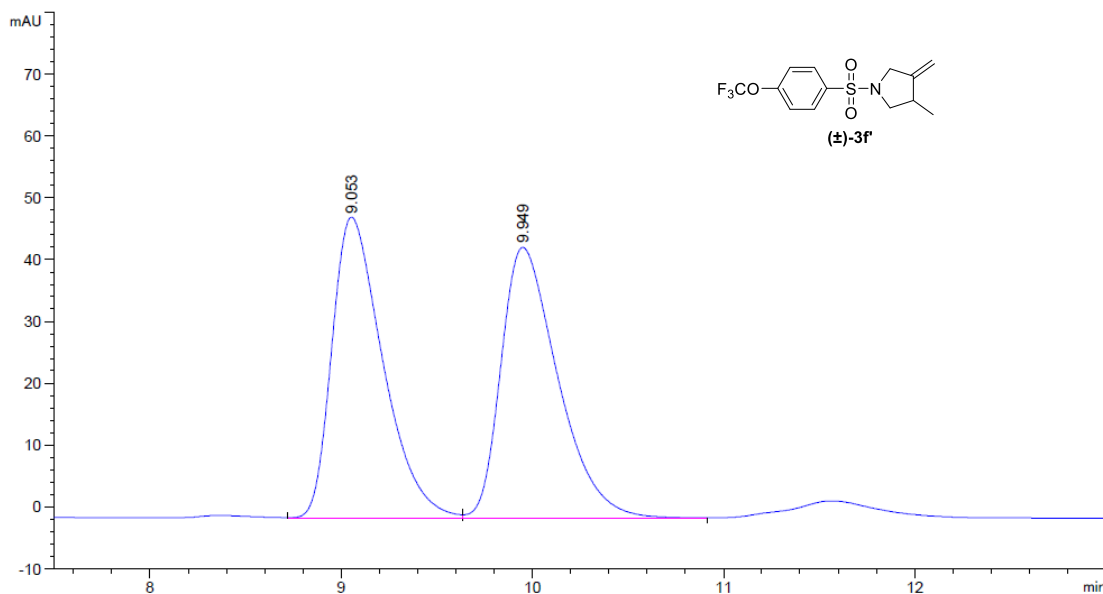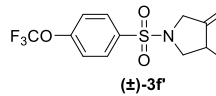

| Peak # | RetTime [min] | Type | Width [min] | Area [mAU*s] | Height [mAU] | Area %  |
|--------|---------------|------|-------------|--------------|--------------|---------|
| 1      | 9.053         | BV   | 0.2816      | 897.57318    | 48.57972     | 49.8961 |
| 2      | 9.949         | VB   | 0.3155      | 901.31171    | 43.72869     | 50.1039 |

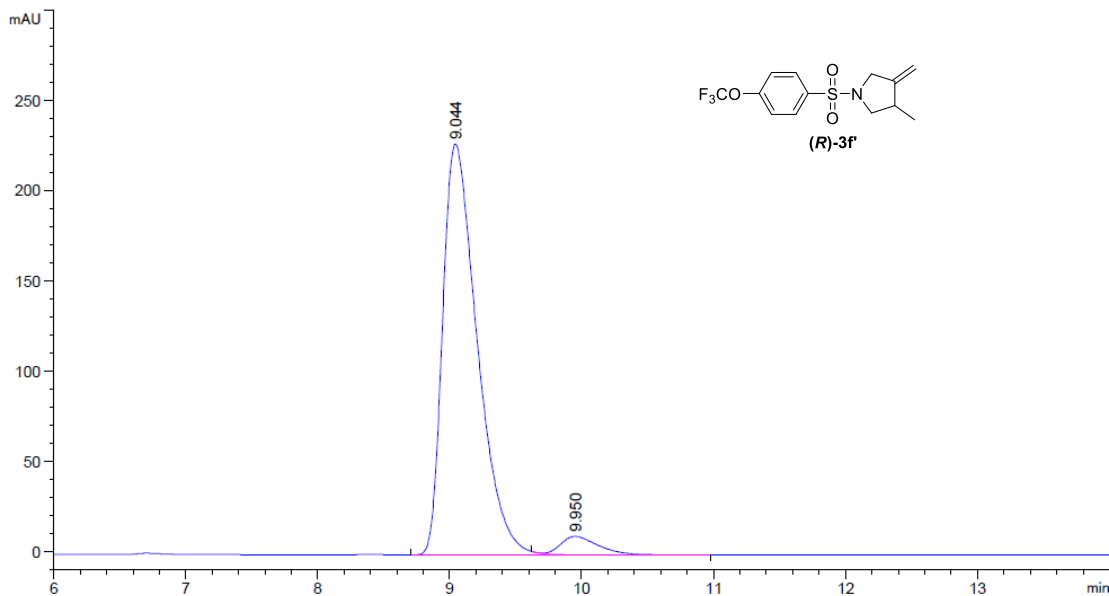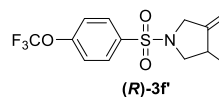

| Peak # | RetTime [min] | Type | Width [min] | Area [mAU*s] | Height [mAU] | Area %  |
|--------|---------------|------|-------------|--------------|--------------|---------|
| 1      | 9.044         | BV R | 0.2776      | 4128.34082   | 227.59370    | 95.2994 |
| 2      | 9.950         | VB E | 0.2996      | 203.62993    | 10.25701     | 4.7006  |

**3-methyl-4-methylene-1-((4-nitrophenyl)sulfonyl)pyrrolidine (3g')**

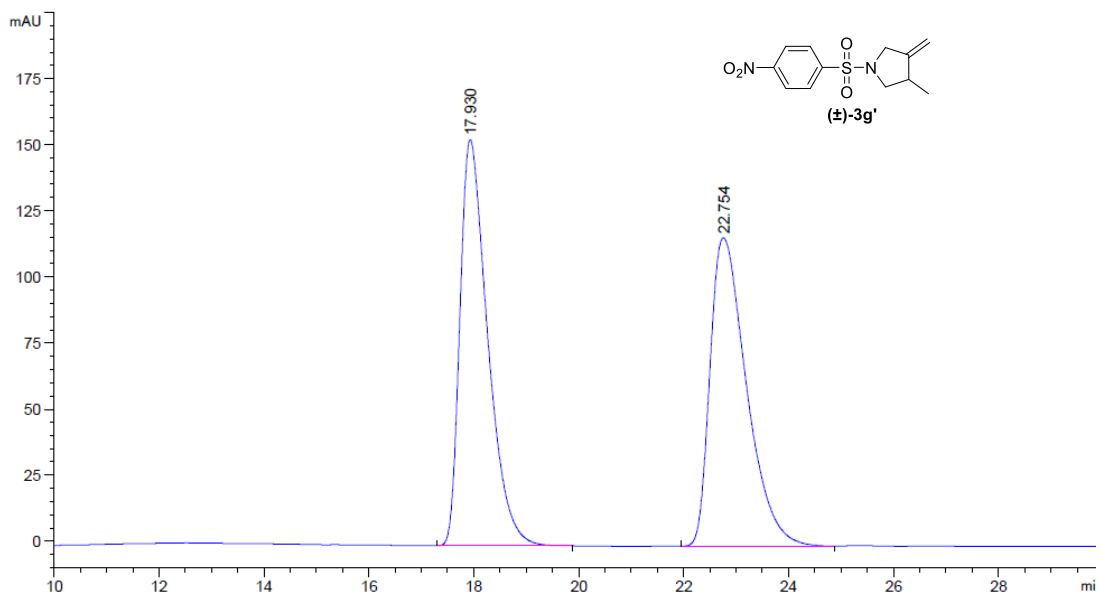

| Peak # | RetTime [min] | Type | Width [min] | Area [mAU*s] | Height [mAU] | Area %  |
|--------|---------------|------|-------------|--------------|--------------|---------|
| 1      | 17.930        | BB   | 0.5589      | 5619.29883   | 153.57312    | 50.0271 |
| 2      | 22.754        | BB   | 0.7409      | 5613.21045   | 116.54325    | 49.9729 |

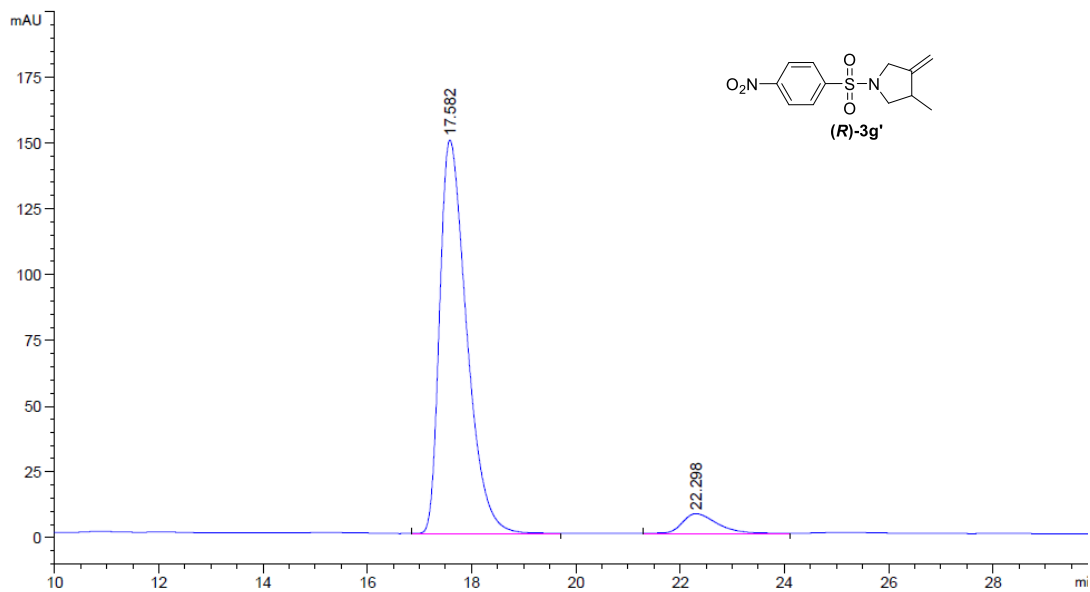

| Peak # | RetTime [min] | Type | Width [min] | Area [mAU*s] | Height [mAU] | Area %  |
|--------|---------------|------|-------------|--------------|--------------|---------|
| 1      | 17.582        | BB   | 0.5504      | 5362.68262   | 149.52744    | 94.0172 |
| 2      | 22.298        | BB   | 0.6781      | 341.25388    | 7.49697      | 5.9828  |

methyl 4-((3-methyl-4-methylenepyrrolidin-1-yl)sulfonyl)benzoate (3h')

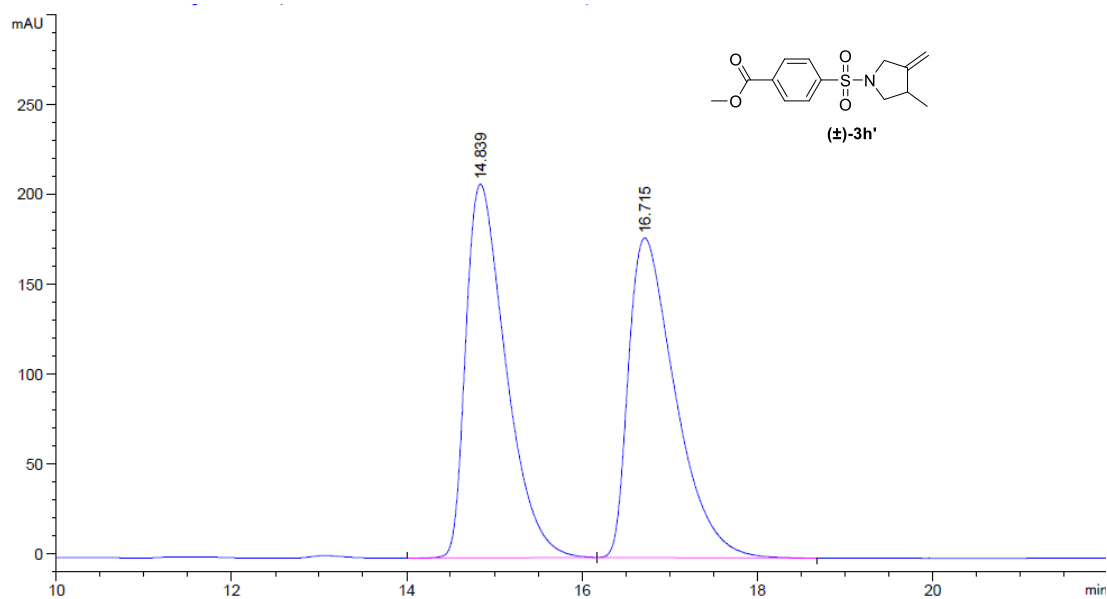

| Peak # | RetTime [min] | Type | Width [min] | Area [mAU*s] | Height [mAU] | Area %  |
|--------|---------------|------|-------------|--------------|--------------|---------|
| 1      | 14.839        | BB   | 0.4814      | 6582.38623   | 207.87241    | 50.0203 |
| 2      | 16.715        | BB   | 0.5585      | 6577.04004   | 177.82298    | 49.9797 |

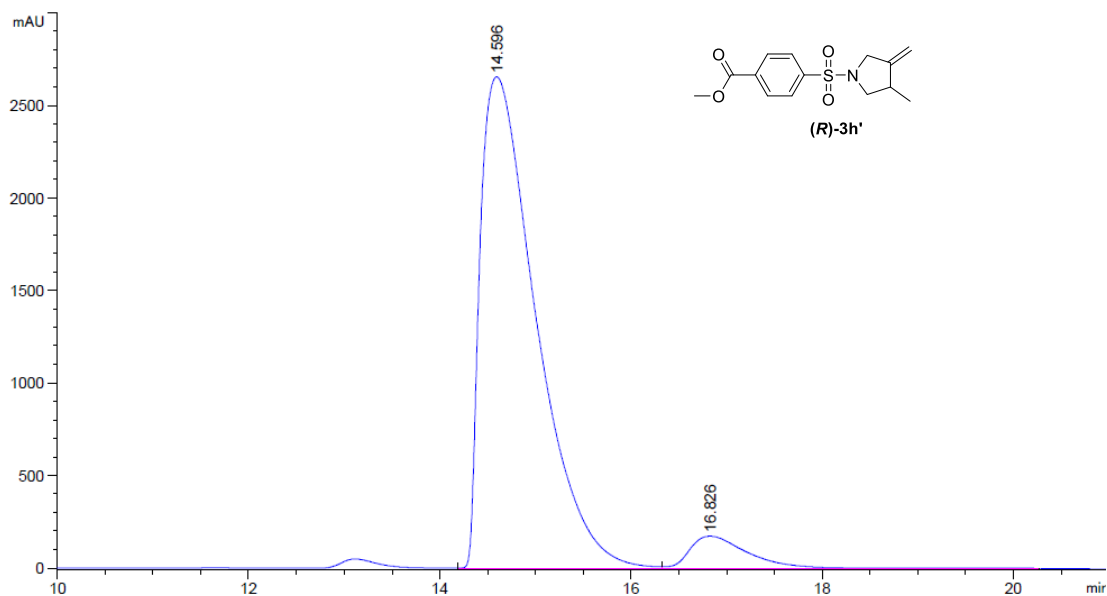

| Peak # | RetTime [min] | Type | Width [min] | Area [mAU*s] | Height [mAU] | Area %  |
|--------|---------------|------|-------------|--------------|--------------|---------|
| 1      | 14.596        | BV   | 0.6164      | 1.06793e5    | 2654.16748   | 93.7077 |
| 2      | 16.826        | VB   | 0.6244      | 7170.99219   | 173.05762    | 6.2923  |

**3-methyl-4-methylene-1-((4-(trifluoromethyl)phenyl)sulfonyl)pyrrolidine (3i')**

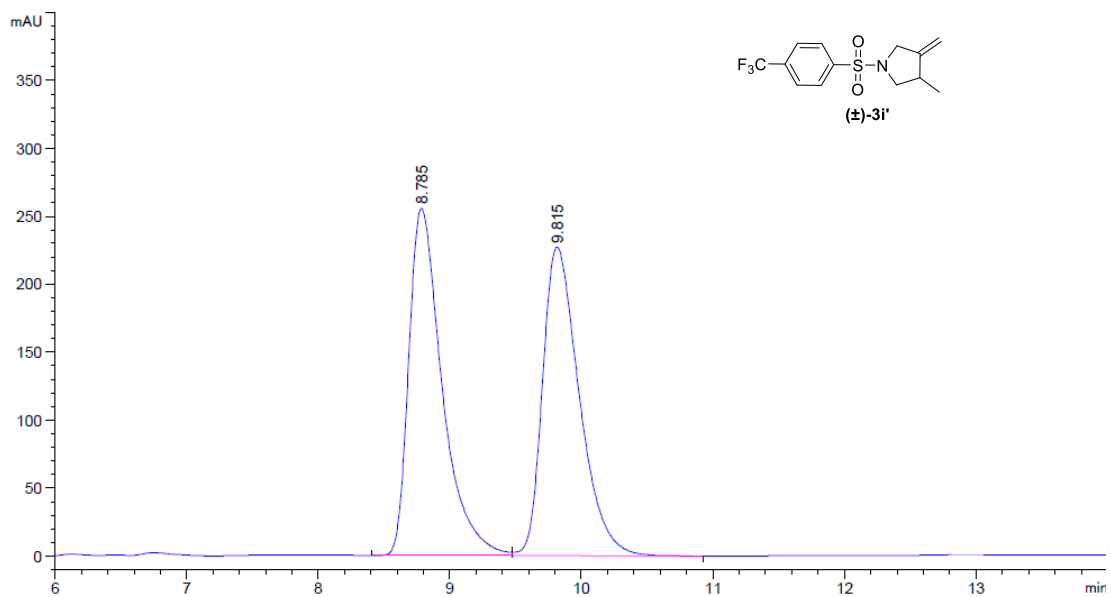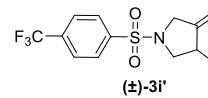

| Peak # | RetTime [min] | Type | Width [min] | Area [mAU*s] | Height [mAU] | Area %  |
|--------|---------------|------|-------------|--------------|--------------|---------|
| 1      | 8.785         | BV   | 0.2664      | 4498.18945   | 255.54601    | 50.5495 |
| 2      | 9.815         | VB   | 0.2970      | 4400.40234   | 227.16895    | 49.4505 |

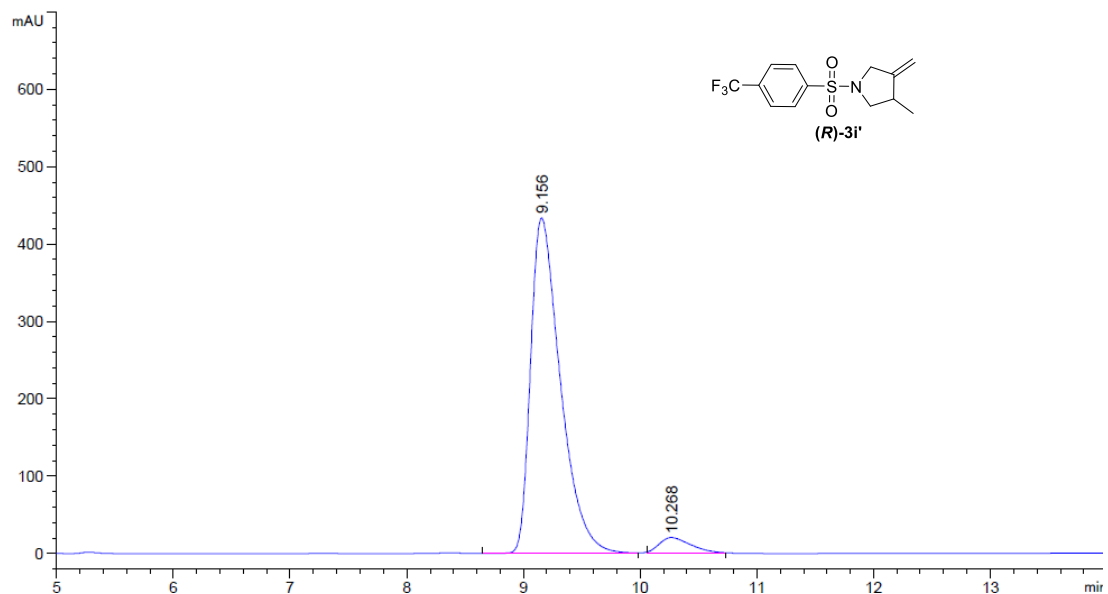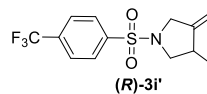

| Peak # | RetTime [min] | Type | Width [min] | Area [mAU*s] | Height [mAU] | Area %  |
|--------|---------------|------|-------------|--------------|--------------|---------|
| 1      | 9.156         | BV   | 0.2687      | 7719.47021   | 433.70844    | 95.5498 |
| 2      | 10.268        | MM   | 0.3069      | 359.53082    | 19.52627     | 4.4502  |

**3-methyl-4-methylene-1-(m-tolylsulfonyl)pyrrolidine (3j')**

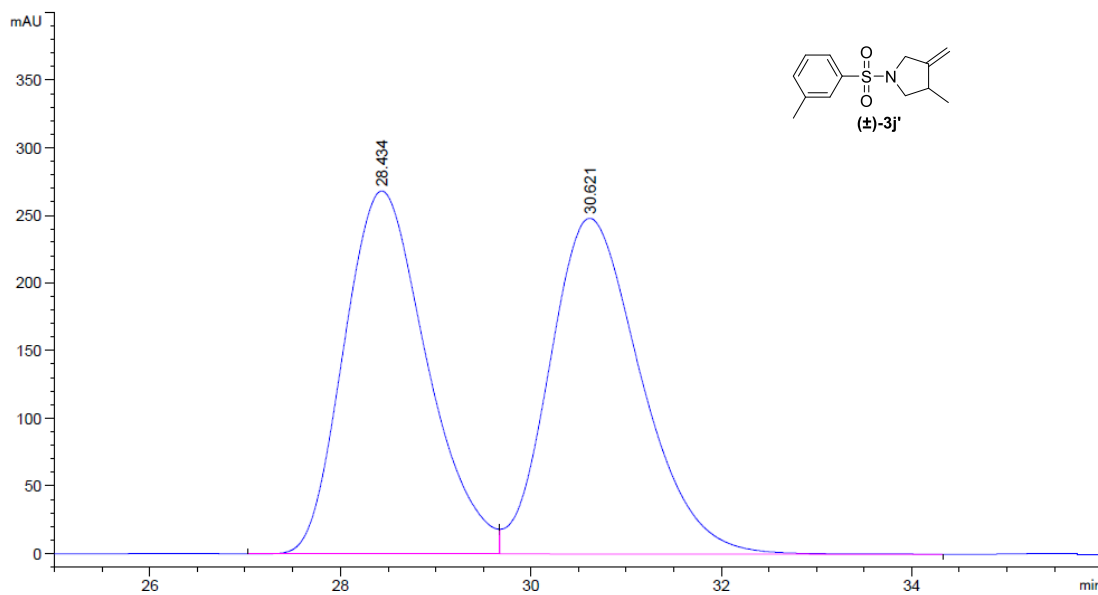

| Peak # | RetTime [min] | Type | Width [min] | Area [mAU*s] | Height [mAU] | Area %  |
|--------|---------------|------|-------------|--------------|--------------|---------|
| 1      | 28.434        | BV   | 0.9006      | 1.62039e4    | 268.28812    | 49.4709 |
| 2      | 30.621        | VB   | 1.0041      | 1.65505e4    | 248.15471    | 50.5291 |

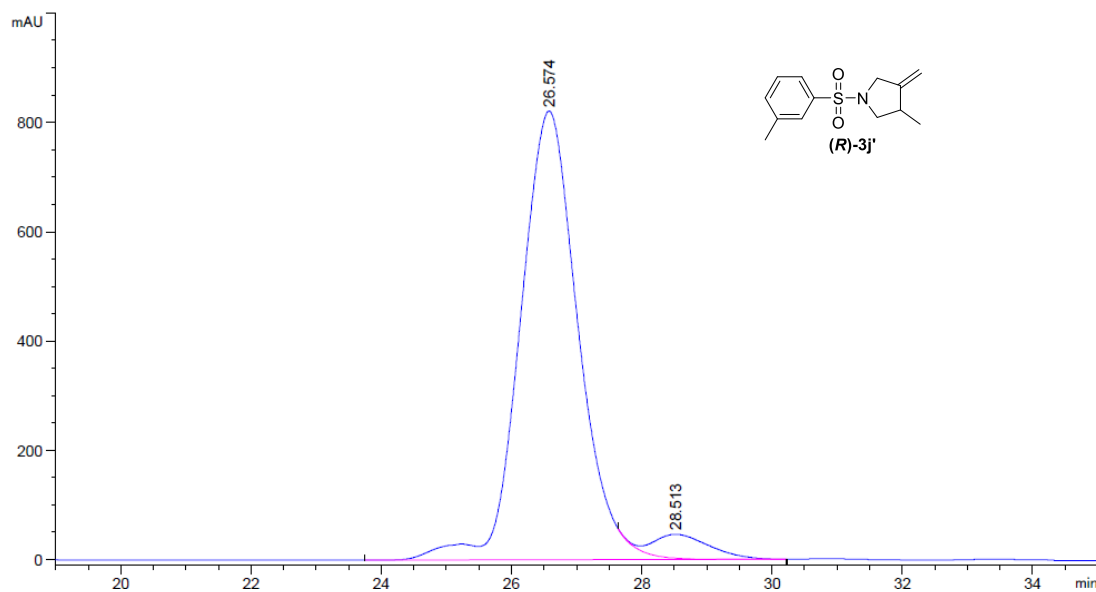

| Peak # | RetTime [min] | Type | Width [min] | Area [mAU*s] | Height [mAU] | Area %  |
|--------|---------------|------|-------------|--------------|--------------|---------|
| 1      | 26.574        | VV R | 0.9247      | 5.07752e4    | 820.88275    | 95.1154 |
| 2      | 28.513        | VB E | 0.9042      | 2607.52612   | 43.63053     | 4.8846  |

**1-((3-bromophenyl)sulfonyl)-3-methyl-4-methylenepyrrolidine (3k')**

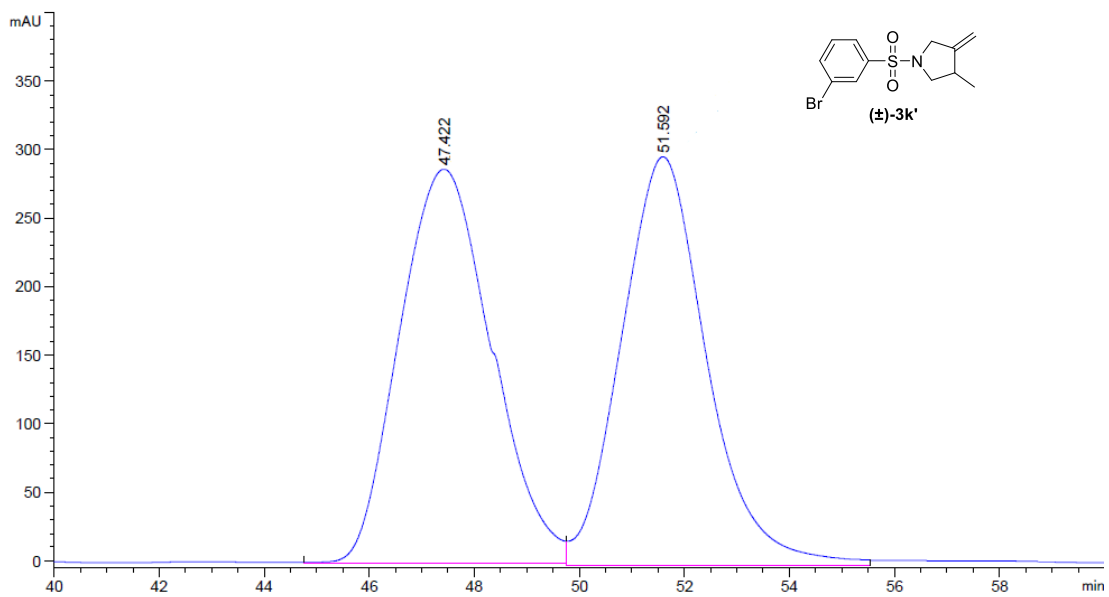

| Peak # | RetTime [min] | Type | Width [min] | Area [mAU*s] | Height [mAU] | Area %  |
|--------|---------------|------|-------------|--------------|--------------|---------|
| 1      | 47.422        | MM   | 2.0355      | 3.51503e4    | 287.80951    | 50.9808 |
| 2      | 51.592        | MM   | 1.8882      | 3.37977e4    | 298.32104    | 49.0192 |

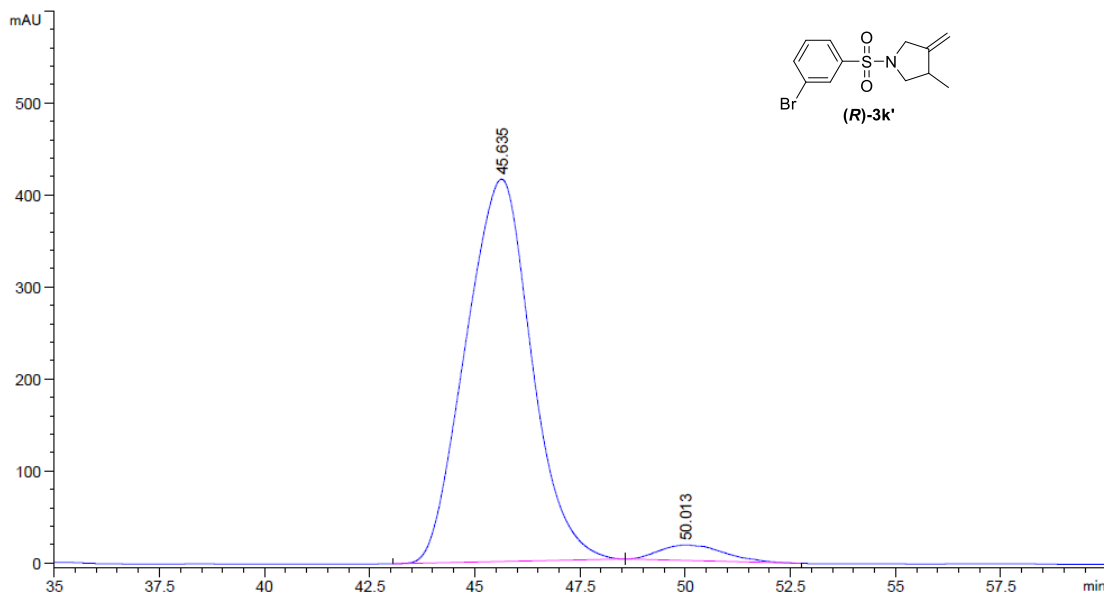

| Peak # | RetTime [min] | Type | Width [min] | Area [mAU*s] | Height [mAU] | Area %  |
|--------|---------------|------|-------------|--------------|--------------|---------|
| 1      | 45.635        | BB   | 1.5772      | 4.52316e4    | 415.44534    | 96.1362 |
| 2      | 50.013        | BB   | 1.4459      | 1817.90588   | 16.78103     | 3.8638  |

1-((3,4-difluorophenyl)sulfonyl)-3-methyl-4-methylenepyrrolidine (3I')

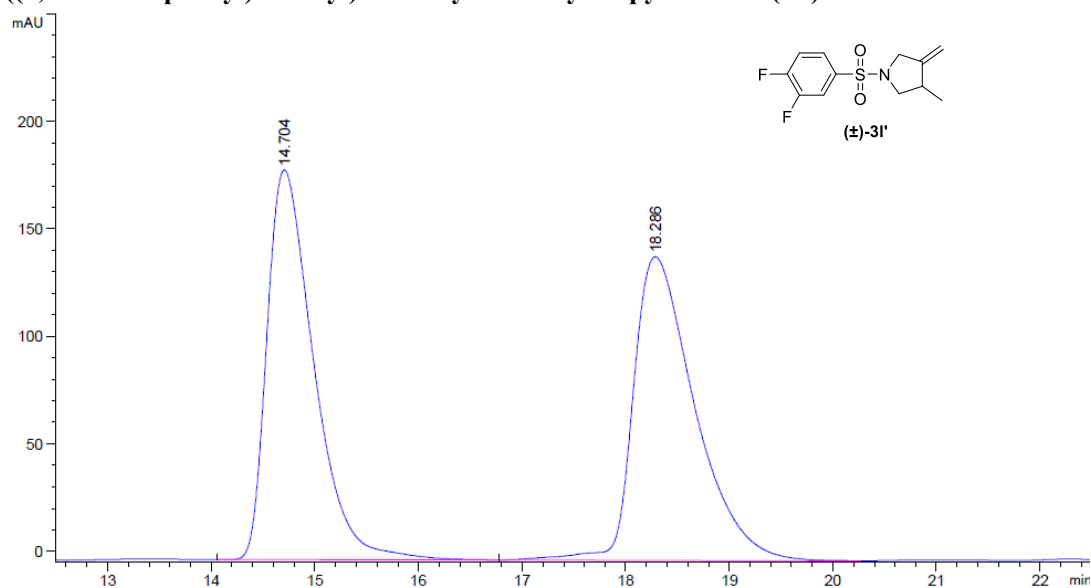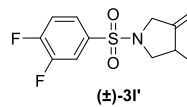

| Peak # | RetTime [min] | Type | Width [min] | Area [mAU*s] | Height [mAU] | Area %  |
|--------|---------------|------|-------------|--------------|--------------|---------|
| 1      | 14.704        | BB   | 0.4804      | 5676.40820   | 181.25691    | 49.4482 |
| 2      | 18.286        | BB   | 0.6277      | 5803.10449   | 141.14828    | 50.5518 |

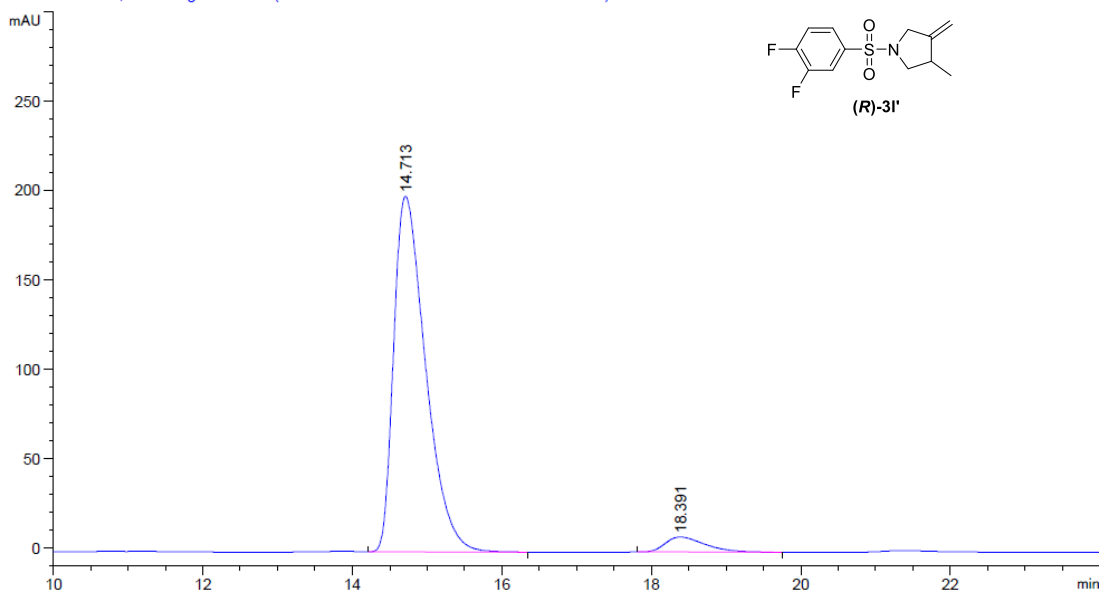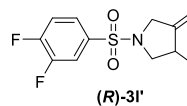

| Peak # | RetTime [min] | Type | Width [min] | Area [mAU*s] | Height [mAU] | Area %  |
|--------|---------------|------|-------------|--------------|--------------|---------|
| 1      | 14.713        | BB   | 0.4567      | 5894.42285   | 198.93617    | 95.0595 |
| 2      | 18.391        | BB   | 0.5530      | 306.34933    | 8.40885      | 4.9405  |

1-((3,4-dimethoxyphenyl)sulfonyl)-3-methyl-4-methylenepyrrolidine (3m')

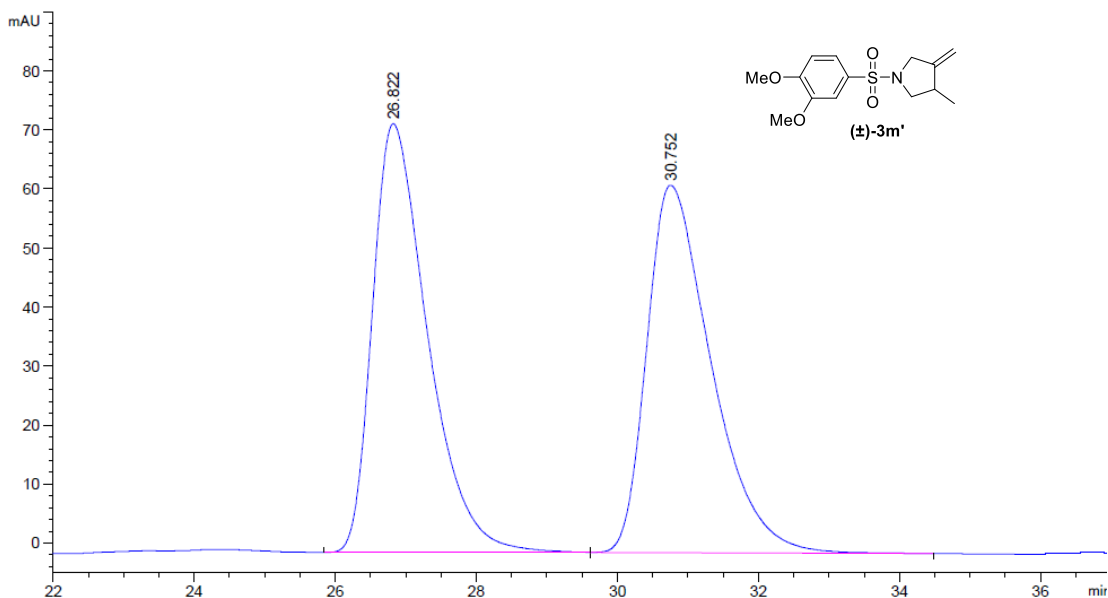

| Peak # | RetTime [min] | Type | Width [min] | Area [mAU*s] | Height [mAU] | Area %  |
|--------|---------------|------|-------------|--------------|--------------|---------|
| 1      | 26.822        | BB   | 0.8241      | 3936.45728   | 72.66045     | 49.9422 |
| 2      | 30.752        | BB   | 0.9303      | 3945.56958   | 62.26105     | 50.0578 |

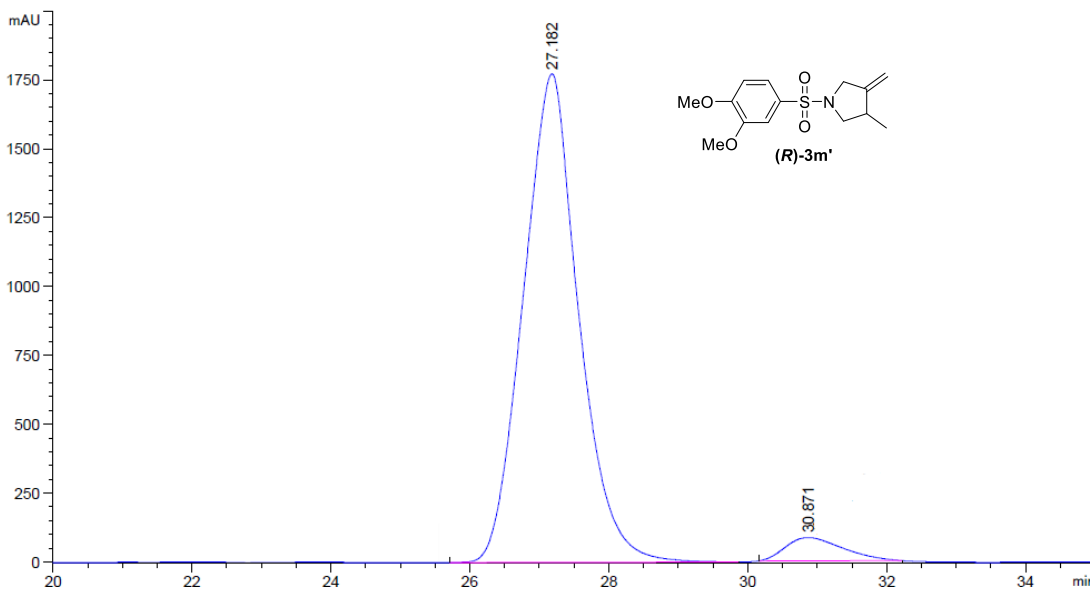

| Peak # | RetTime [min] | Type | Width [min] | Area [mAU*s] | Height [mAU] | Area %  |
|--------|---------------|------|-------------|--------------|--------------|---------|
| 1      | 27.182        | BB   | 0.8178      | 9.78740e4    | 1773.73535   | 95.3008 |
| 2      | 30.871        | MM   | 0.9494      | 4826.10449   | 84.72484     | 4.6992  |



**3-methyl-4-methylene-1-(naphthalen-2-ylsulfonyl)pyrrolidine (3n')**

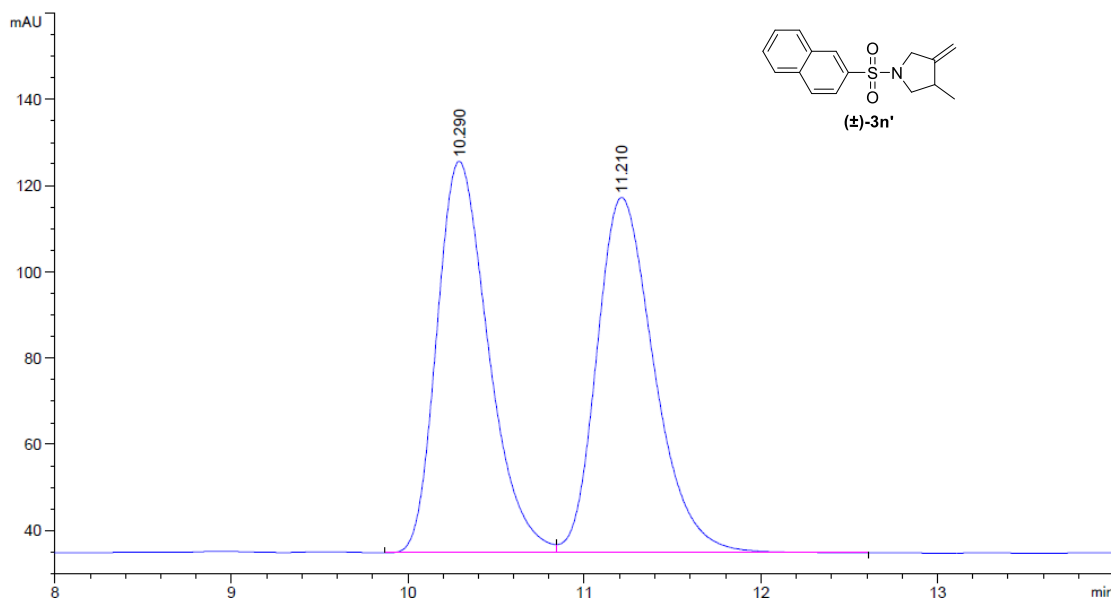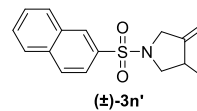

| Peak # | RetTime [min] | Type | Width [min] | Area [mAU*s] | Height [mAU] | Area %  |
|--------|---------------|------|-------------|--------------|--------------|---------|
| 1      | 10.290        | BV   | 0.3135      | 1840.23926   | 90.76534     | 49.6050 |
| 2      | 11.210        | VB   | 0.3496      | 1869.55017   | 82.41641     | 50.3950 |

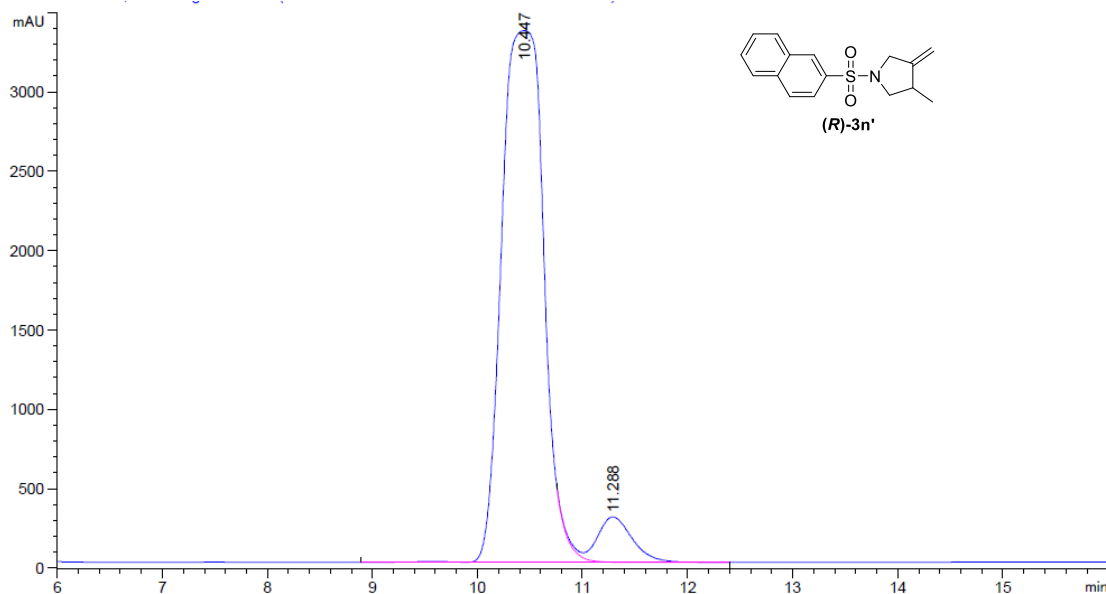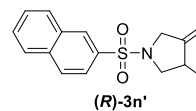

| Peak # | RetTime [min] | Type | Width [min] | Area [mAU*s] | Height [mAU] | Area %  |
|--------|---------------|------|-------------|--------------|--------------|---------|
| 1      | 10.447        | VV R | 0.4397      | 9.31753e4    | 3351.21875   | 93.2691 |
| 2      | 11.288        | VB E | 0.3589      | 6724.10840   | 285.32446    | 6.7309  |

***N,N*-dimethyl-6-((3-methyl-4-methylenepyrrolidin-1-yl)sulfonyl)naphthalen-2-amine (3o')**

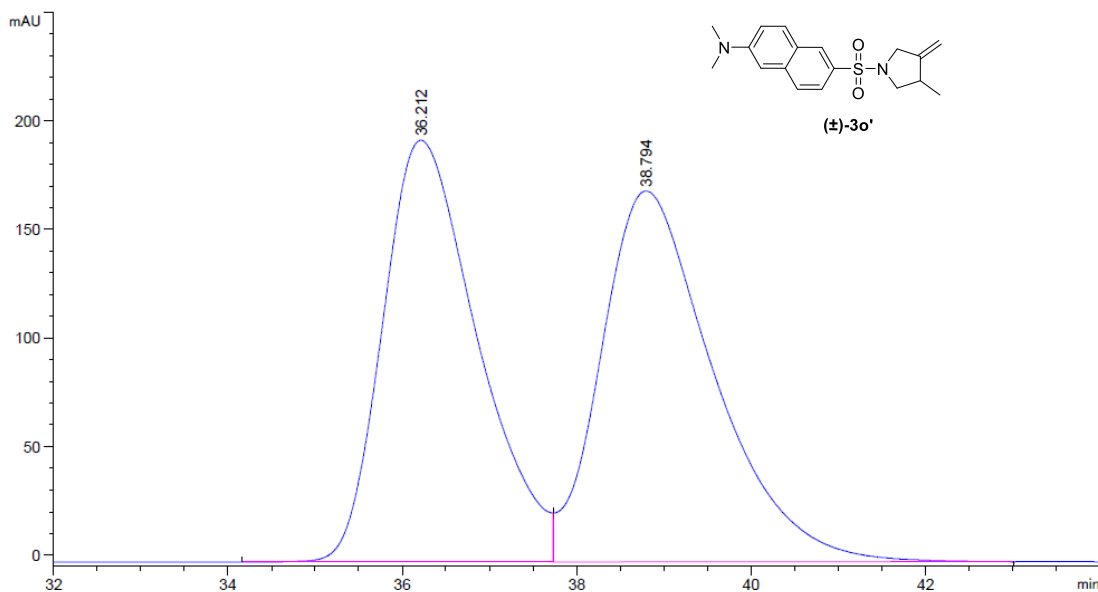

| Peak # | RetTime [min] | Type | Width [min] | Area [mAU*s] | Height [mAU] | Area %  |
|--------|---------------|------|-------------|--------------|--------------|---------|
| 1      | 36.212        | BV   | 1.1193      | 1.46377e4    | 194.22481    | 48.8216 |
| 2      | 38.794        | VB   | 1.3171      | 1.53443e4    | 170.79376    | 51.1784 |

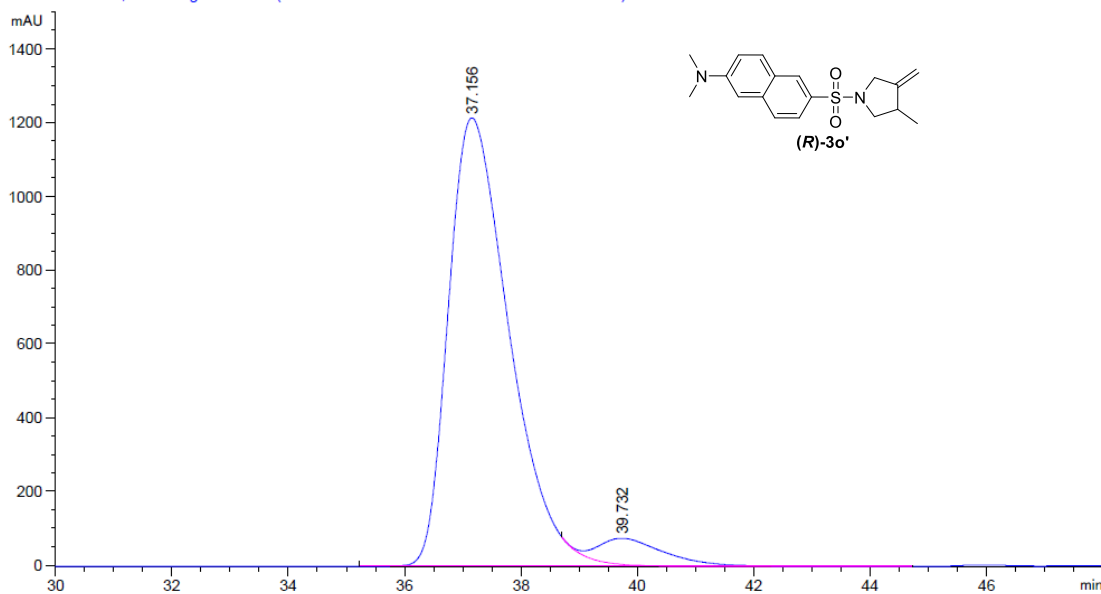

| Peak # | RetTime [min] | Type | Width [min] | Area [mAU*s] | Height [mAU] | Area %  |
|--------|---------------|------|-------------|--------------|--------------|---------|
| 1      | 37.156        | BV R | 1.0911      | 8.85723e4    | 1215.49426   | 94.0427 |
| 2      | 39.732        | VB E | 1.1468      | 5610.71973   | 70.70194     | 5.9573  |

**3-methyl-4-methylene-1-(thiophen-2-ylsulfonyl)pyrrolidine (3p')**

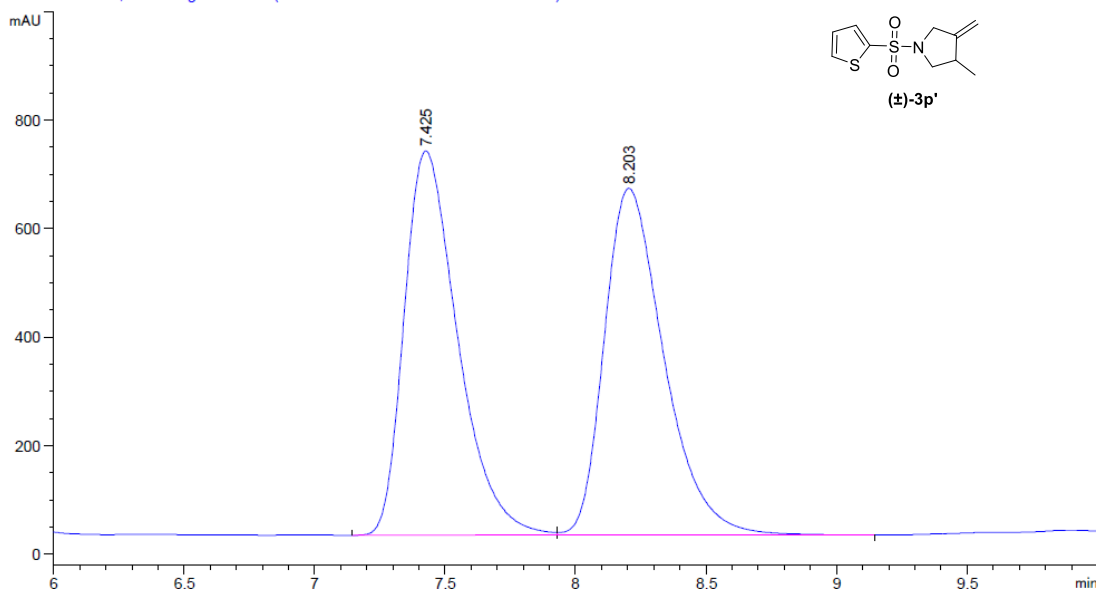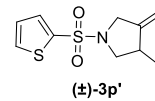

| Peak # | RetTime [min] | Type | Width [min] | Area [mAU*s] | Height [mAU] | Area %  |
|--------|---------------|------|-------------|--------------|--------------|---------|
| 1      | 7.425         | BV   | 0.2173      | 1.00901e4    | 707.96863    | 49.8178 |
| 2      | 8.203         | VB   | 0.2436      | 1.01639e4    | 639.05658    | 50.1822 |

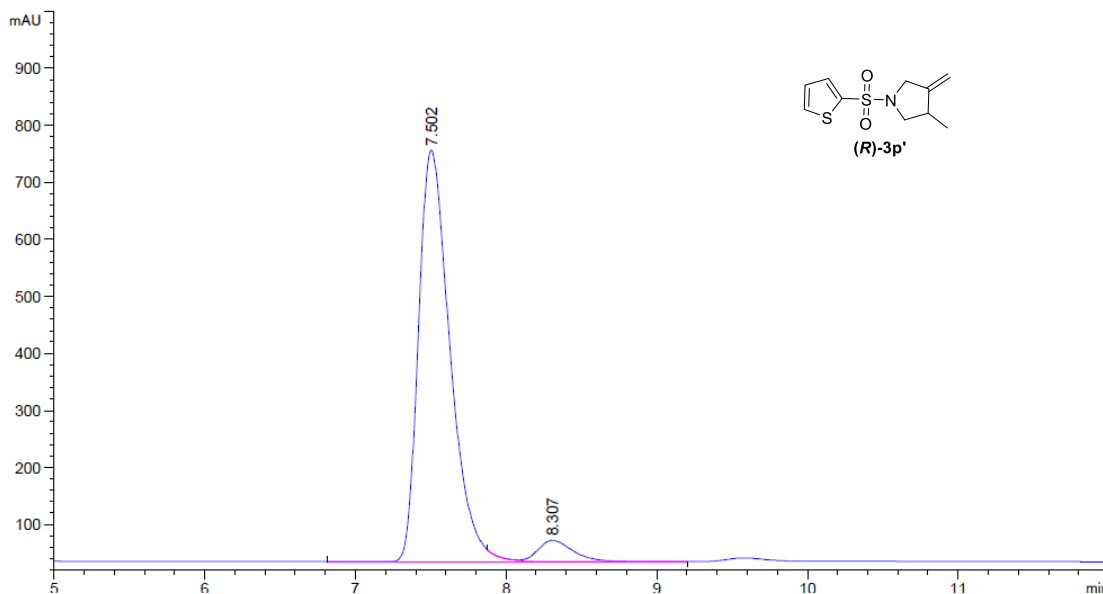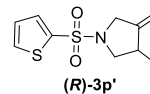

| Peak # | RetTime [min] | Type | Width [min] | Area [mAU*s] | Height [mAU] | Area %  |
|--------|---------------|------|-------------|--------------|--------------|---------|
| 1      | 7.502         | VV R | 0.2234      | 1.04849e4    | 721.94165    | 94.5471 |
| 2      | 8.307         | VB E | 0.2479      | 604.70184    | 37.14797     | 5.4529  |

3-((3-methyl-4-methylenepyrrolidin-1-yl)sulfonyl)pyridine (3q')

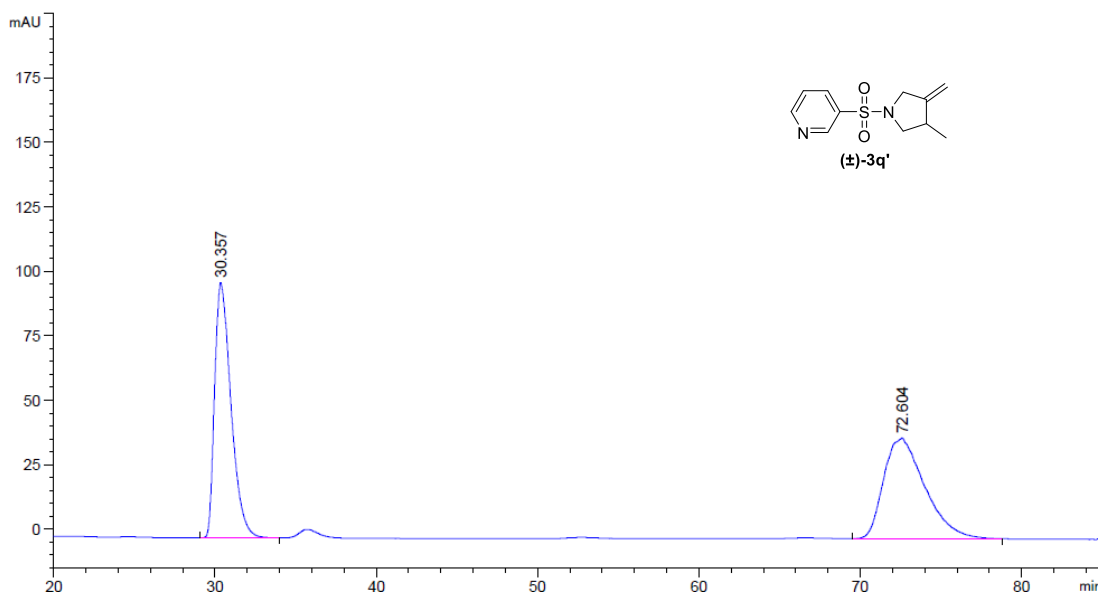

| Peak # | RetTime [min] | Type | Width [min] | Area [mAU*s] | Height [mAU] | Area %  |
|--------|---------------|------|-------------|--------------|--------------|---------|
| 1      | 30.357        | BB   | 1.0969      | 6962.95068   | 98.95885     | 50.2152 |
| 2      | 72.604        | BB   | 2.1127      | 6903.27686   | 39.06319     | 49.7848 |

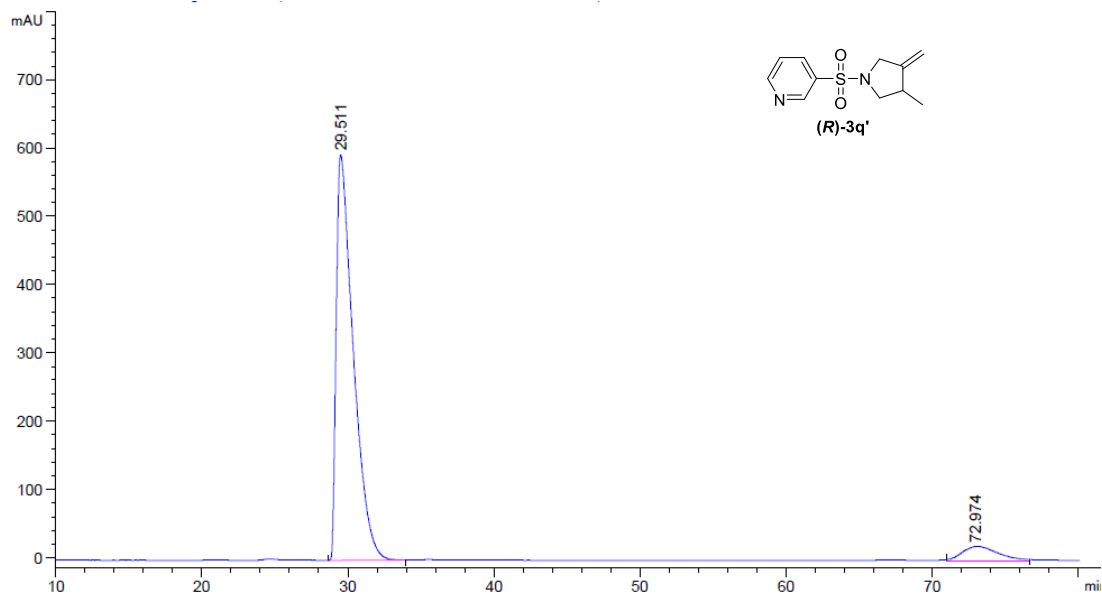

| Peak # | RetTime [min] | Type | Width [min] | Area [mAU*s] | Height [mAU] | Area %  |
|--------|---------------|------|-------------|--------------|--------------|---------|
| 1      | 29.511        | BB   | 1.1704      | 4.80333e4    | 593.98621    | 92.9775 |
| 2      | 72.974        | MM   | 2.8530      | 3627.88818   | 21.19357     | 7.0225  |

**3-methyl-4-methylene-1-(methylsulfonyl)pyrrolidine (3r')**

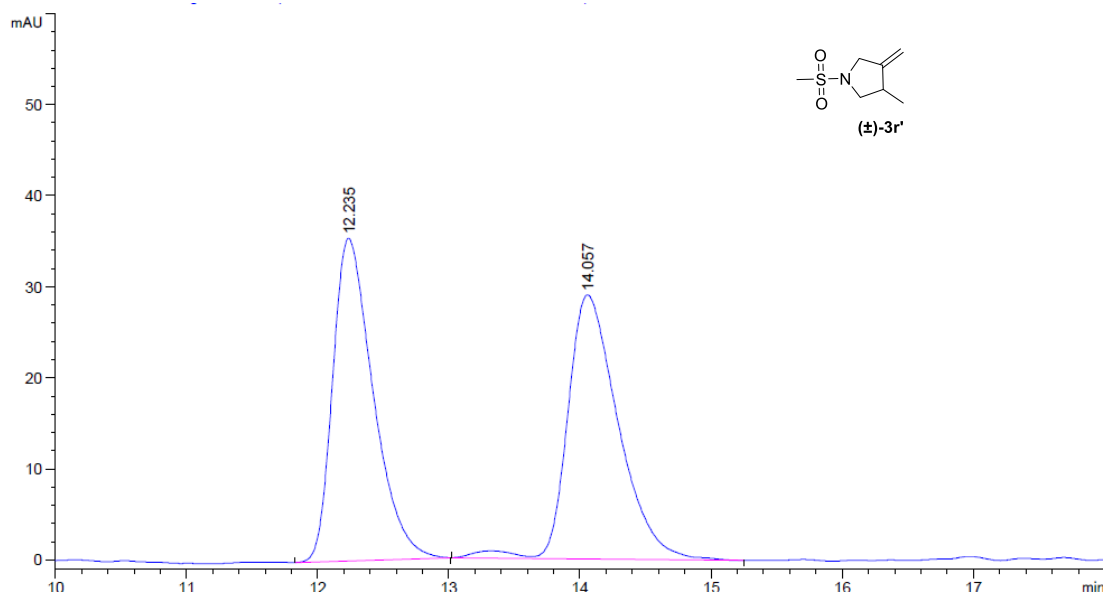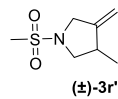

| Peak # | RetTime [min] | Type | Width [min] | Area [mAU*s] | Height [mAU] | Area %  |
|--------|---------------|------|-------------|--------------|--------------|---------|
| 1      | 12.235        | BB   | 0.3269      | 758.20026    | 35.39188     | 49.2659 |
| 2      | 14.057        | VB R | 0.4104      | 780.79572    | 28.97334     | 50.7341 |

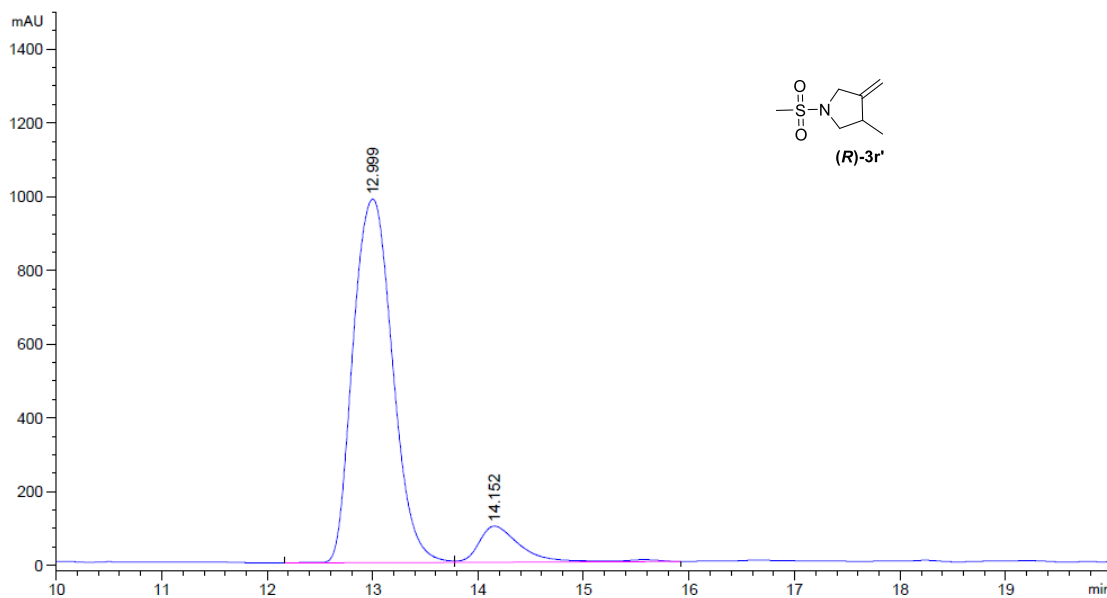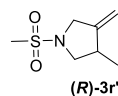

| Peak # | RetTime [min] | Type | Width [min] | Area [mAU*s] | Height [mAU] | Area %  |
|--------|---------------|------|-------------|--------------|--------------|---------|
| 1      | 12.999        | VV R | 0.4180      | 2.56081e4    | 985.85498    | 90.3747 |
| 2      | 14.152        | VV R | 0.4046      | 2727.36646   | 97.86531     | 9.6253  |

**1-(ethylsulfonyl)-3-methyl-4-methylenepyrrolidine (3s')**

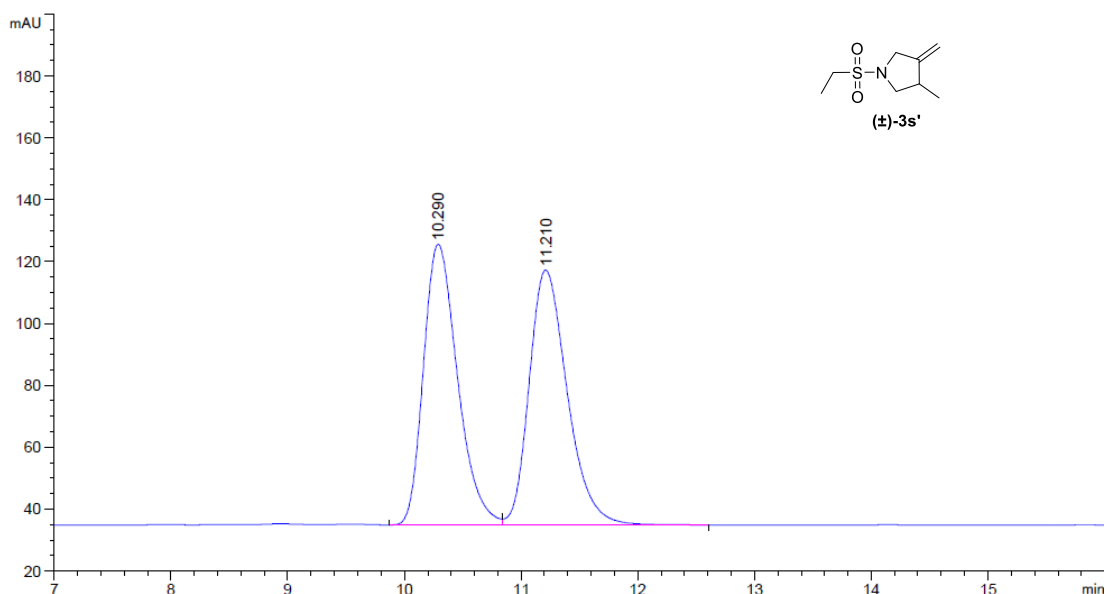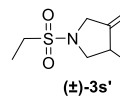

| Peak # | RetTime [min] | Type | Width [min] | Area [mAU*s] | Height [mAU] | Area %  |
|--------|---------------|------|-------------|--------------|--------------|---------|
| 1      | 10.290        | BV   | 0.3135      | 1840.23926   | 90.76534     | 49.6050 |
| 2      | 11.210        | VB   | 0.3496      | 1869.55017   | 82.41641     | 50.3950 |

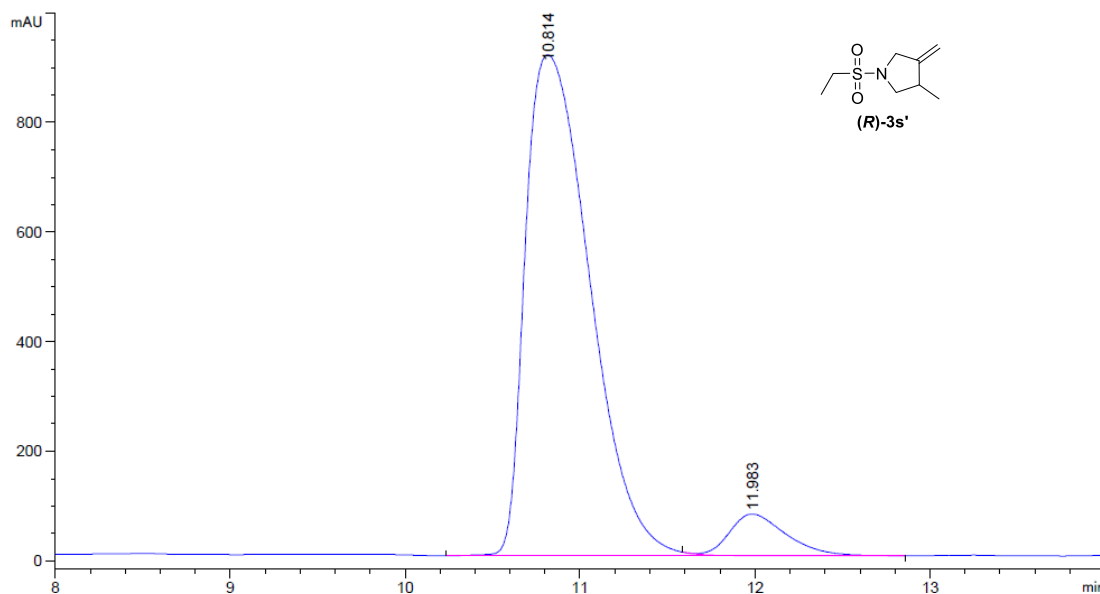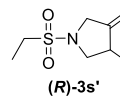

| Peak # | RetTime [min] | Type | Width [min] | Area [mAU*s] | Height [mAU] | Area %  |
|--------|---------------|------|-------------|--------------|--------------|---------|
| 1      | 10.814        | BV R | 0.4084      | 2.34011e4    | 914.76959    | 93.2202 |
| 2      | 11.983        | VB E | 0.3391      | 1701.92712   | 76.05640     | 6.7798  |

1-(4-Toluenesulfonyl)-3-(Z)-ethylidene-4-methylpyrrolidine (3ad')

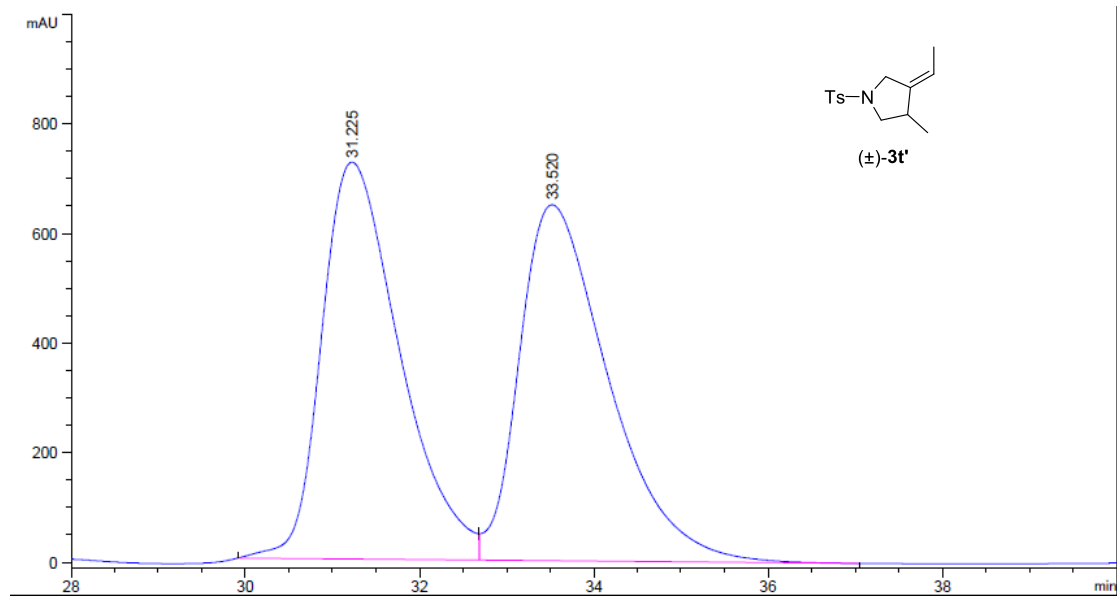

| Peak # | RetTime [min] | Type | Width [min] | Area [mAU*s] | Height [mAU] | Area %  |
|--------|---------------|------|-------------|--------------|--------------|---------|
| 1      | 31.225        | BV   | 0.9094      | 4.50769e4    | 723.98248    | 49.3932 |
| 2      | 33.520        | VB   | 1.0809      | 4.61845e4    | 649.28455    | 50.6068 |

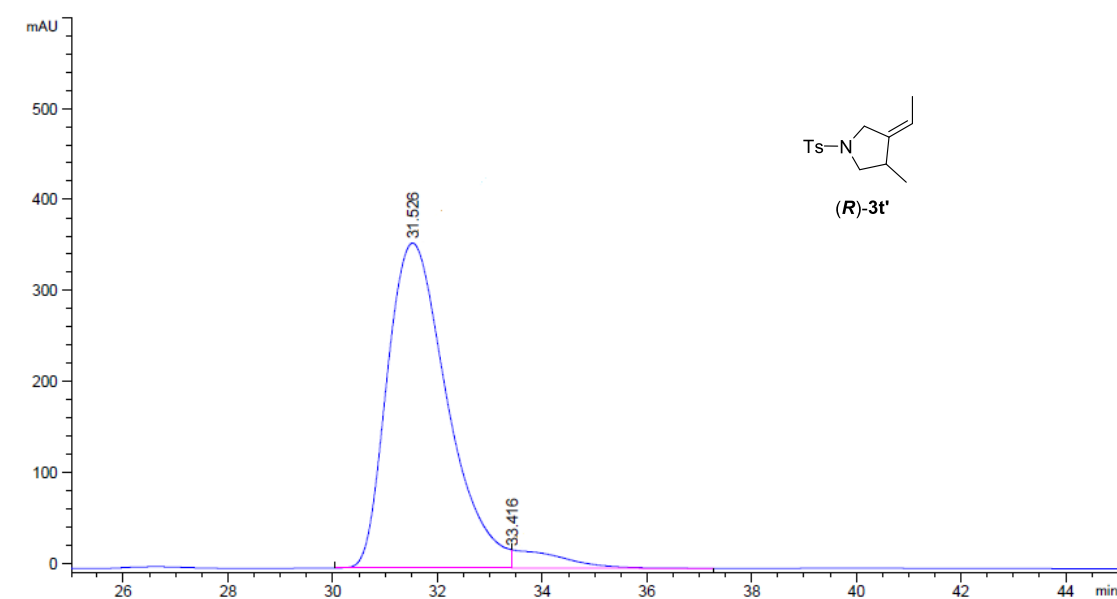

| Peak # | RetTime [min] | Type | Width [min] | Area [mAU*s] | Height [mAU] | Area %  |
|--------|---------------|------|-------------|--------------|--------------|---------|
| 1      | 31.526        | MF   | 1.3226      | 2.83259e4    | 356.94998    | 95.5217 |
| 2      | 33.416        | FM   | 1.1032      | 1327.99658   | 20.06285     | 4.4783  |

### 4,4-Bis(ethoxycarbonyl)-1-methylidene-2-methyl-cyclopentane (3u')

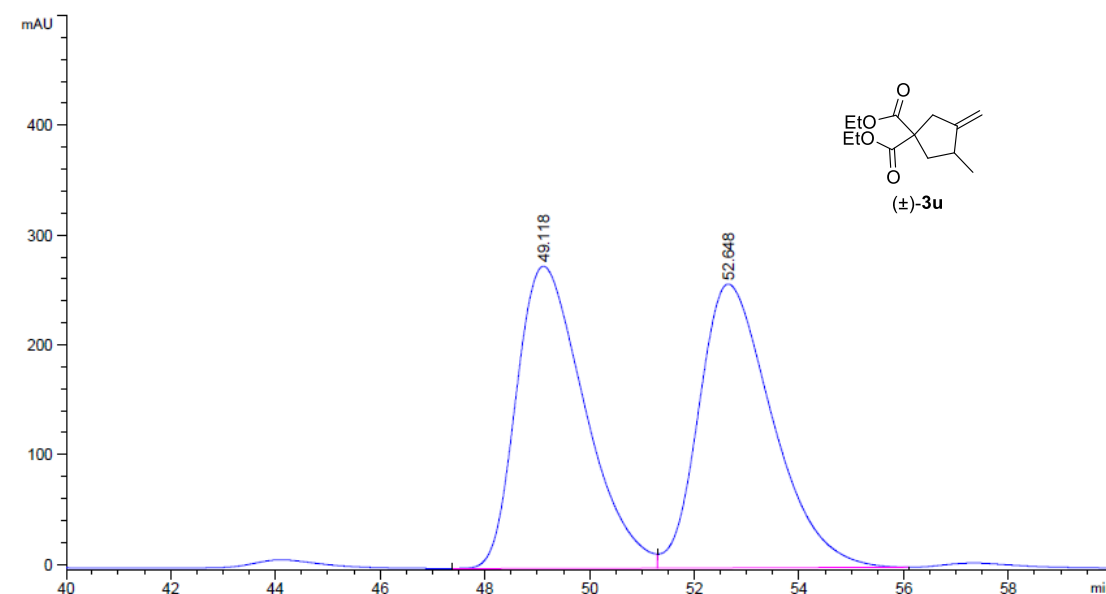

| Peak # | RetTime [min] | Type | Width [min] | Area [mAU*s] | Height [mAU] | Area %  |
|--------|---------------|------|-------------|--------------|--------------|---------|
| 1      | 49.118        | BV   | 1.3895      | 2.49200e4    | 274.91559    | 49.7436 |
| 2      | 52.648        | VB   | 1.4867      | 2.51769e4    | 258.40640    | 50.2564 |

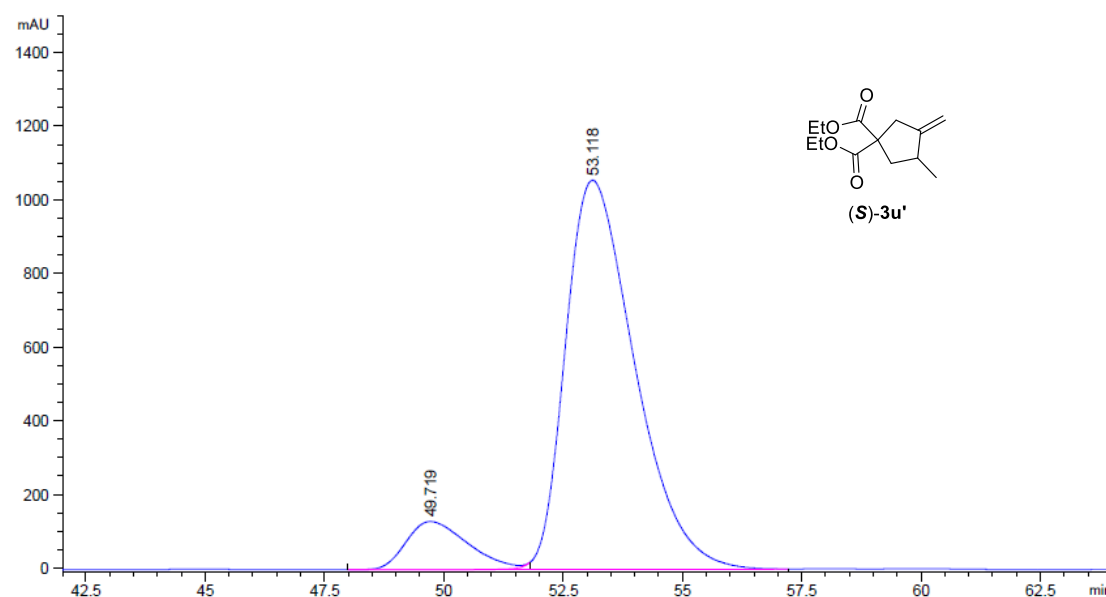

| Peak # | RetTime [min] | Type | Width [min] | Area [mAU*s] | Height [mAU] | Area %  |
|--------|---------------|------|-------------|--------------|--------------|---------|
| 1      | 49.719        | BV E | 1.3449      | 1.17228e4    | 130.76067    | 9.9119  |
| 2      | 53.118        | VB R | 1.5345      | 1.06547e5    | 1056.58984   | 90.0881 |



**1-(4-Toluenesulfonyl)-3-methylidene-4-methylpyrrolidine (3v')**

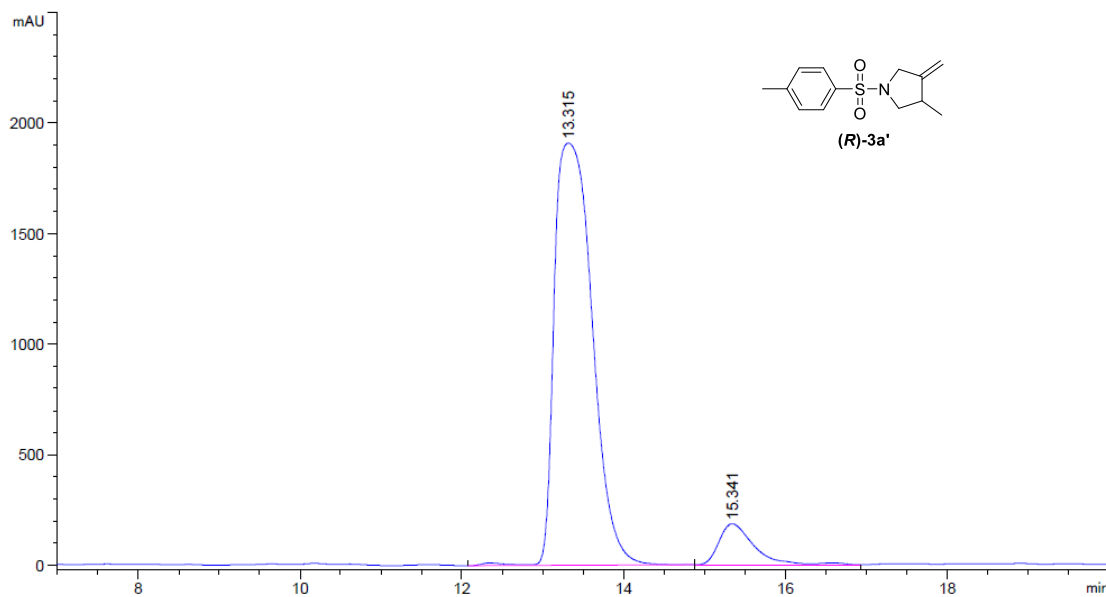

| Peak # | RetTime [min] | Type | Width [min] | Area [mAU*s] | Height [mAU] | Area %  |
|--------|---------------|------|-------------|--------------|--------------|---------|
| 1      | 13.315        | VV R | 0.5207      | 6.22680e4    | 1908.94250   | 91.6957 |
| 2      | 15.341        | BV R | 0.4435      | 5639.23438   | 185.66132    | 8.3043  |

**1-(4-Toluenesulfonyl)-3-methylidene-4-methylpyrrolidine (3w')**

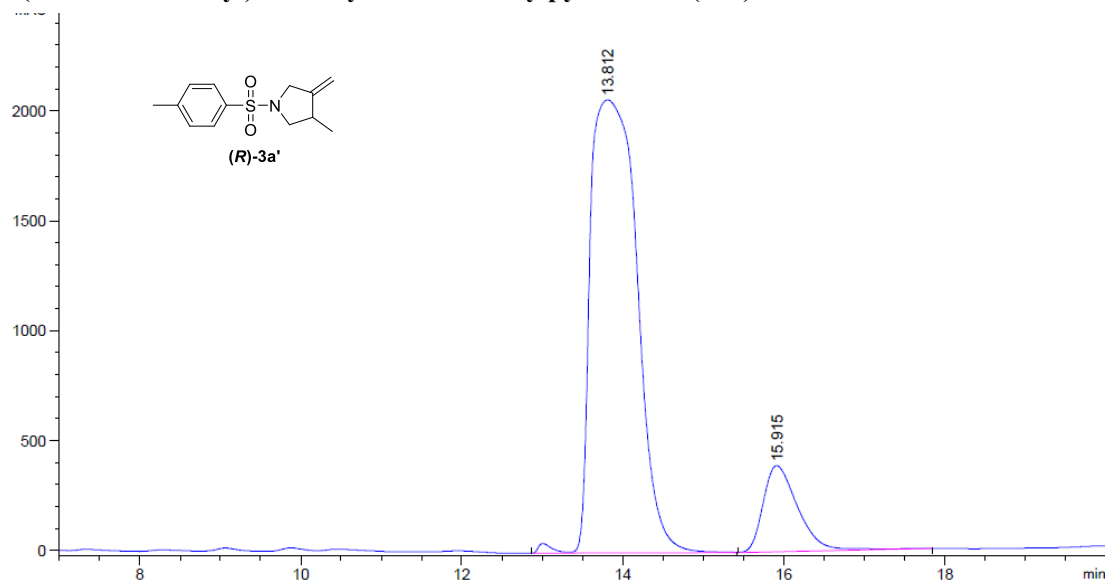

| Peak # | RetTime [min] | Type | Width [min] | Area [mAU*s] | Height [mAU] | Area %  |
|--------|---------------|------|-------------|--------------|--------------|---------|
| 1      | 13.812        | VB R | 0.6477      | 8.26497e4    | 2061.63867   | 87.5968 |
| 2      | 15.915        | BV R | 0.4539      | 1.17027e4    | 391.23346    | 12.4032 |

**1-(4-Toluenesulfonyl)-3-methylidene-4-methylpyrrolidine (3x')**

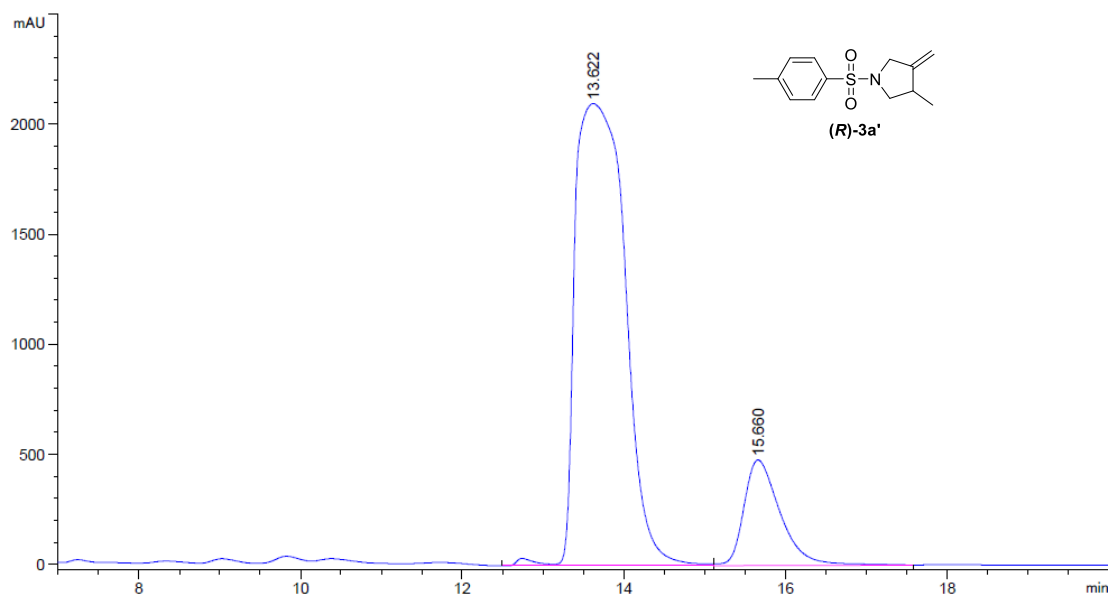

| Peak # | RetTime [min] | Type | Width [min] | Area [mAU*s] | Height [mAU] | Area %  |
|--------|---------------|------|-------------|--------------|--------------|---------|
| 1      | 13.622        | VV R | 0.6930      | 8.98161e4    | 2099.27246   | 85.7615 |
| 2      | 15.660        | VB   | 0.4735      | 1.49117e4    | 478.53925    | 14.2385 |

**1-(4-Toluenesulfonyl)-3-methylidene-4-methylpyrrolidine (3y')**

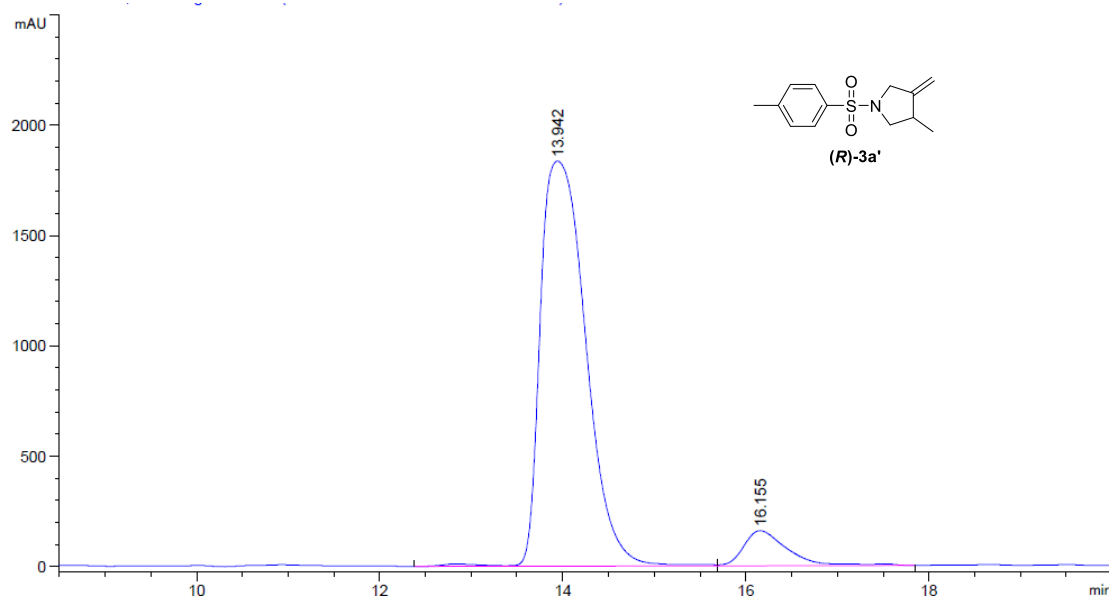

| Peak # | RetTime [min] | Type | Width [min] | Area [mAU*s] | Height [mAU] | Area %  |
|--------|---------------|------|-------------|--------------|--------------|---------|
| 1      | 13.942        | VV R | 0.5474      | 6.33794e4    | 1835.45374   | 92.1752 |
| 2      | 16.155        | VV R | 0.4962      | 5380.28320   | 159.54355    | 7.8248  |

**1-(4-Toluenesulfonyl)-3-methylidene-4-methylpyrrolidine (3z')**

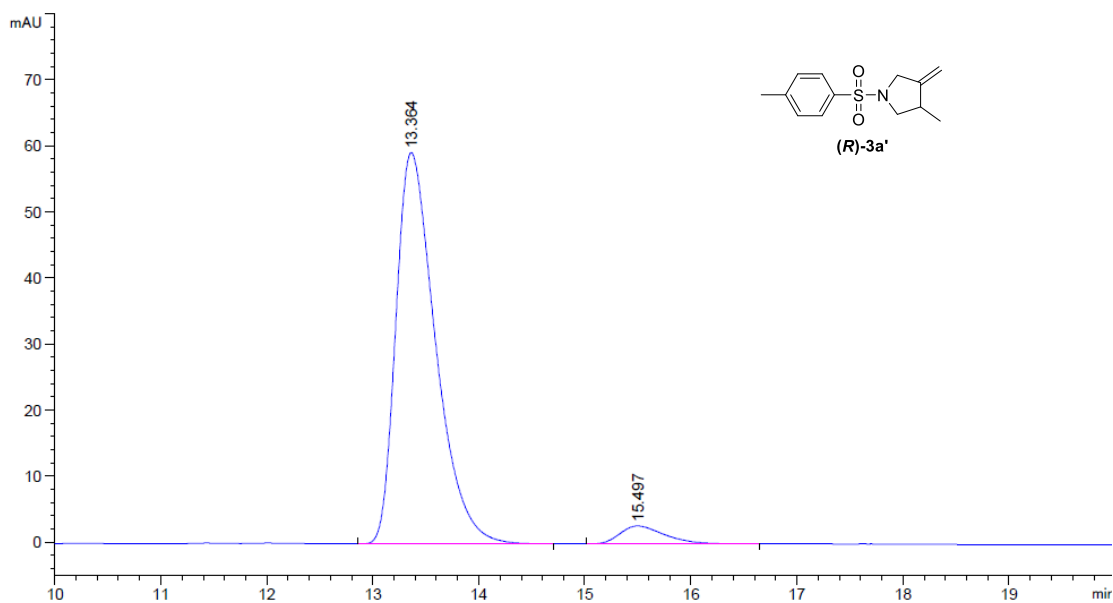

| Peak # | RetTime [min] | Type | Width [min] | Area [mAU*s] | Height [mAU] | Area %  |
|--------|---------------|------|-------------|--------------|--------------|---------|
| 1      | 13.364        | BB   | 0.3983      | 1538.78296   | 59.19247     | 95.0660 |
| 2      | 15.497        | BB   | 0.4357      | 79.86419     | 2.71861      | 4.9340  |

**1-(4-Toluenesulfonyl)-3-methylidene-4-methylpyrrolidine (3aa')**

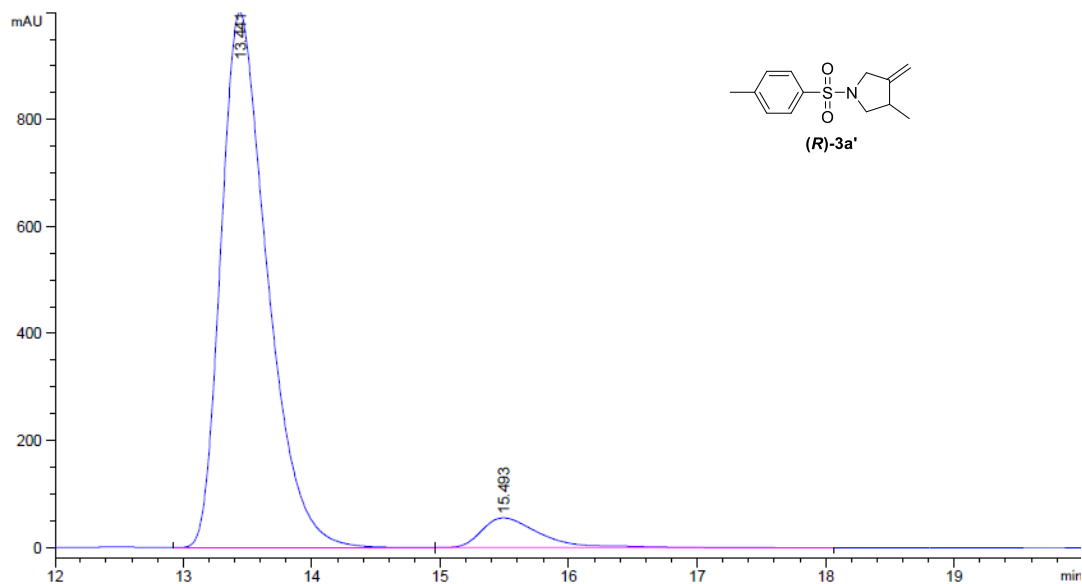

| Peak # | RetTime [min] | Type | Width [min] | Area [mAU*s] | Height [mAU] | Area %  |
|--------|---------------|------|-------------|--------------|--------------|---------|
| 1      | 13.440        | BB   | 0.3791      | 2.50682e4    | 1001.39874   | 94.8003 |
| 2      | 15.492        | MM   | 0.4483      | 1374.95581   | 51.11588     | 5.1997  |

**1-(4-Toluenesulfonyl)-3-methylidene-4-methylpyrrolidine (3ab')**

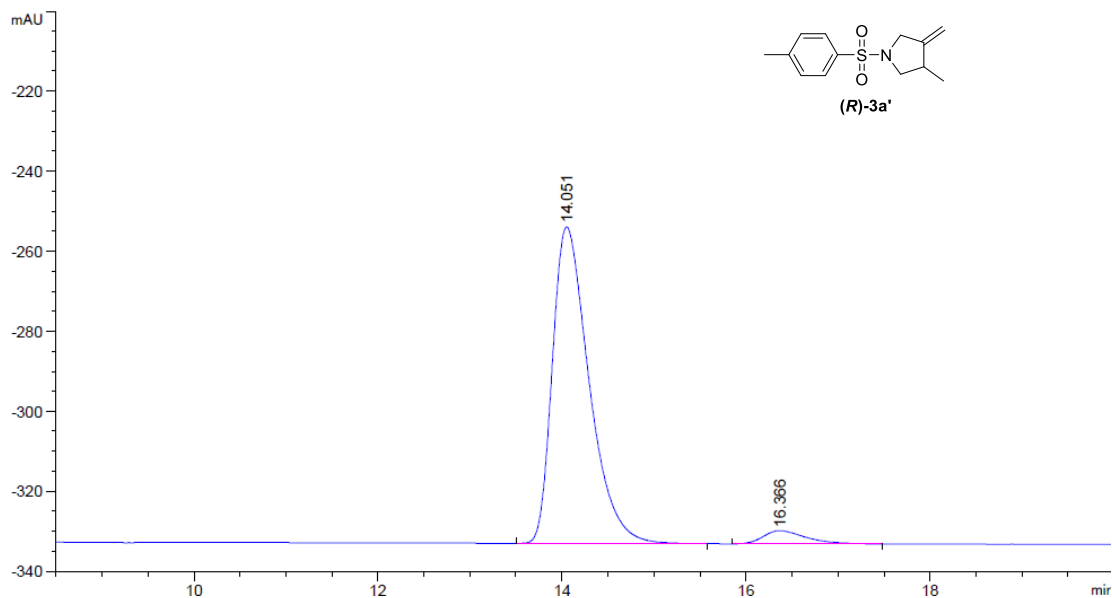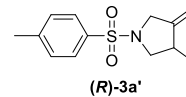

| Peak # | RetTime [min] | Type | Width [min] | Area [mAU*s] | Height [mAU] | Area %  |
|--------|---------------|------|-------------|--------------|--------------|---------|
| 1      | 14.051        | BB   | 0.4223      | 2185.33789   | 79.10061     | 95.4803 |
| 2      | 16.366        | BB   | 0.4743      | 103.44588    | 3.25914      | 4.5197  |

**1-(4-Toluenesulfonyl)-3-methylidene-4-methylpyrrolidine (3ac')**

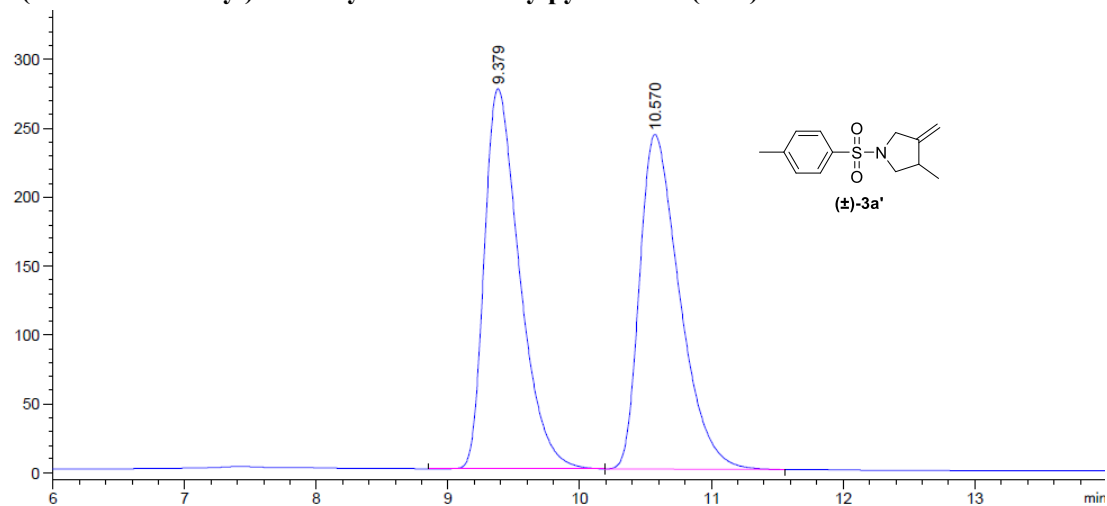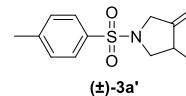

| Peak # | RetTime [min] | Type | Width [min] | Area [mAU*s] | Height [mAU] | Area %  |
|--------|---------------|------|-------------|--------------|--------------|---------|
| 1      | 9.379         | BB   | 0.2835      | 5121.37012   | 275.93030    | 49.9936 |
| 2      | 10.570        | BB   | 0.3221      | 5122.68164   | 242.81082    | 50.0064 |

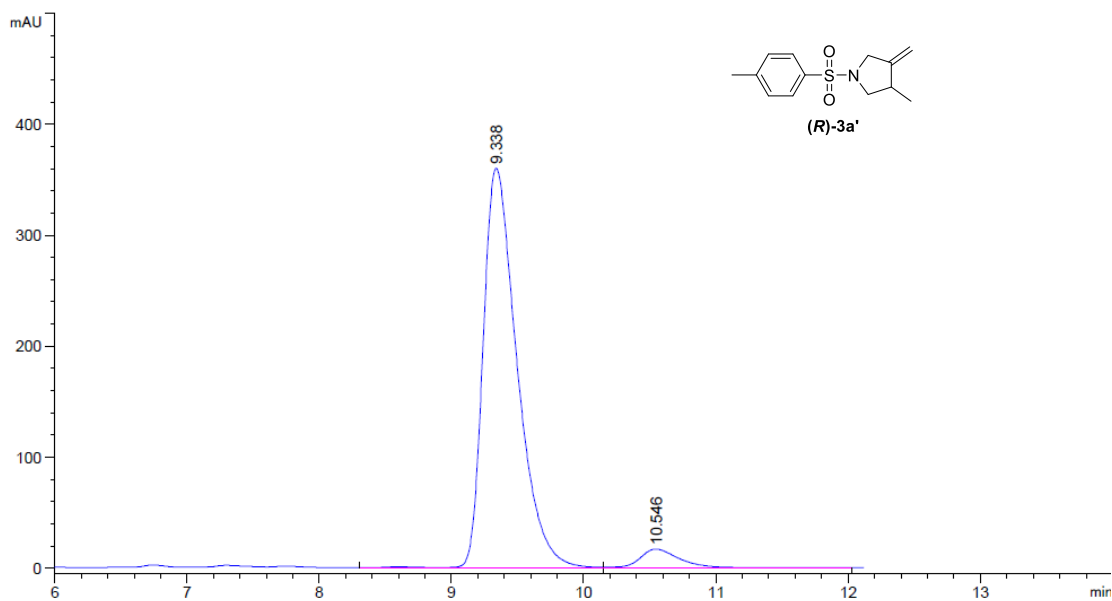

| Peak # | RetTime [min] | Type | Width [min] | Area [mAU*s] | Height [mAU] | Area %  |
|--------|---------------|------|-------------|--------------|--------------|---------|
| 1      | 9.338         | VV R | 0.2678      | 6383.76709   | 360.12320    | 94.7966 |
| 2      | 10.546        | VB   | 0.3083      | 350.40326    | 16.87083     | 5.2034  |

**1-(4-Toluenesulfonyl)-3-methylidene-4-methylpyrrolidine (3ad')**

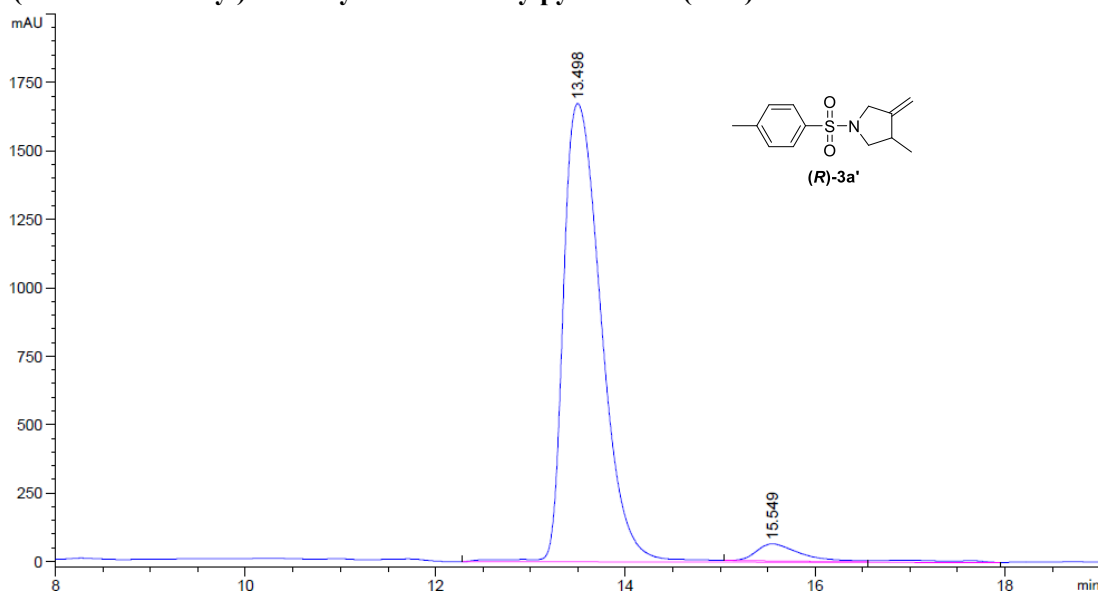

| Peak # | RetTime [min] | Type | Width [min] | Area [mAU*s] | Height [mAU] | Area %  |
|--------|---------------|------|-------------|--------------|--------------|---------|
| 1      | 13.498        | VV R | 0.4346      | 4.69955e4    | 1673.39502   | 95.9192 |
| 2      | 15.549        | VV E | 0.4733      | 1999.40540   | 62.48328     | 4.0808  |

**1-(4-Toluenesulfonyl)-3-methylidene-4-methylpyrrolidine (3ae')**

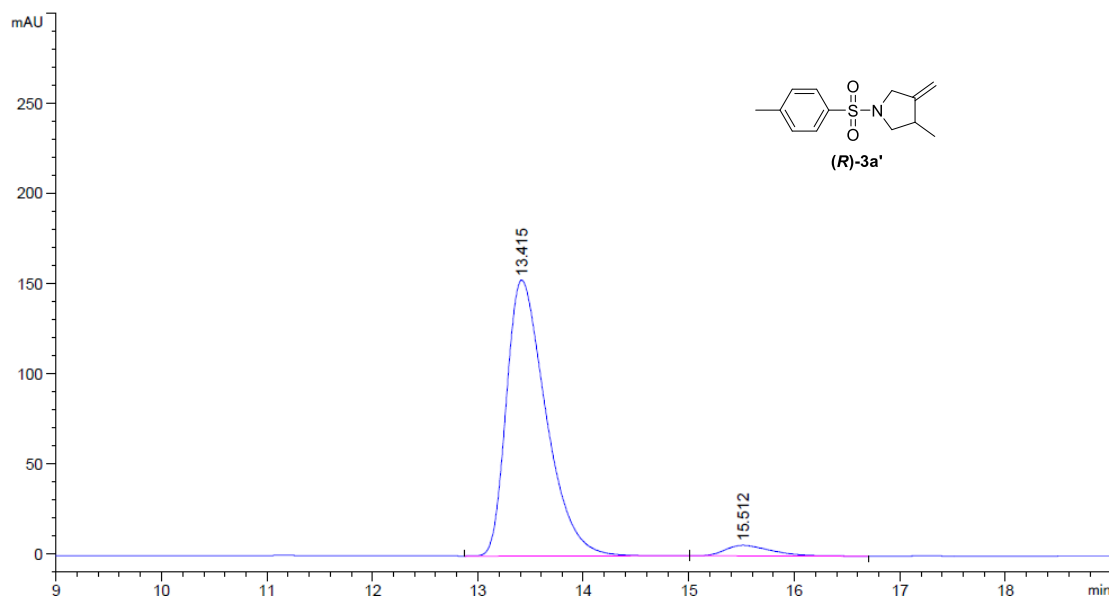

| Peak # | RetTime [min] | Type | Width [min] | Area [mAU*s] | Height [mAU] | Area %  |
|--------|---------------|------|-------------|--------------|--------------|---------|
| 1      | 13.415        | BB   | 0.3980      | 3975.87012   | 153.07588    | 95.7132 |
| 2      | 15.512        | BB   | 0.4578      | 178.07050    | 5.87211      | 4.2868  |

**(E)-3-benzylidene-4-methyl-1-tosylpyrrolidine (S14)**

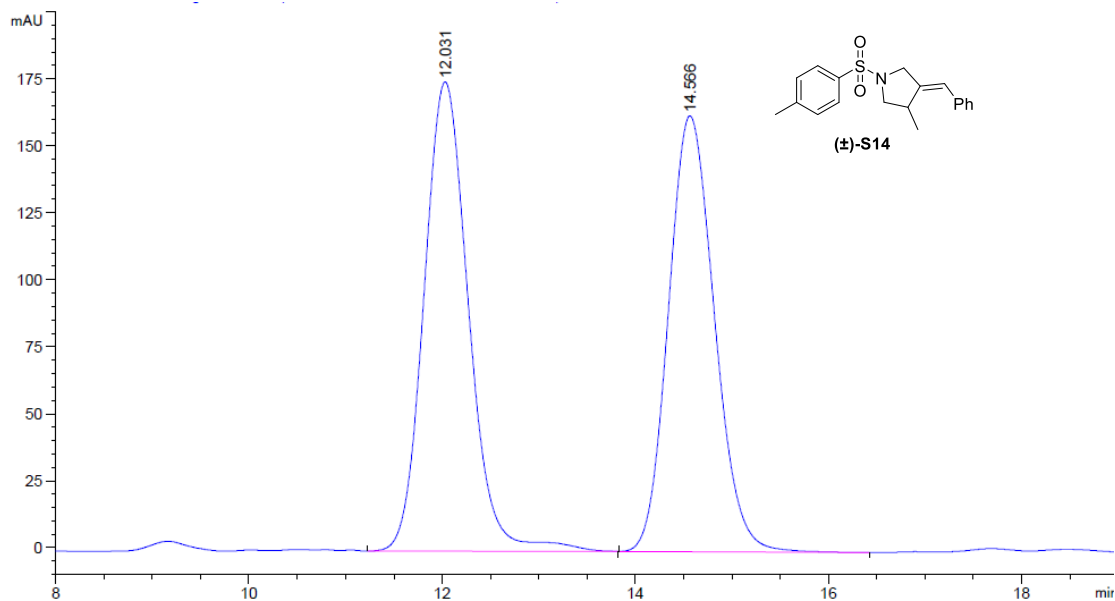

| Peak # | RetTime [min] | Type | Width [min] | Area [mAU*s] | Height [mAU] | Area %  |
|--------|---------------|------|-------------|--------------|--------------|---------|
| 1      | 12.031        | BB   | 0.4952      | 5600.27637   | 175.08325    | 51.0776 |
| 2      | 14.566        | BB   | 0.5168      | 5363.96631   | 162.61739    | 48.9224 |

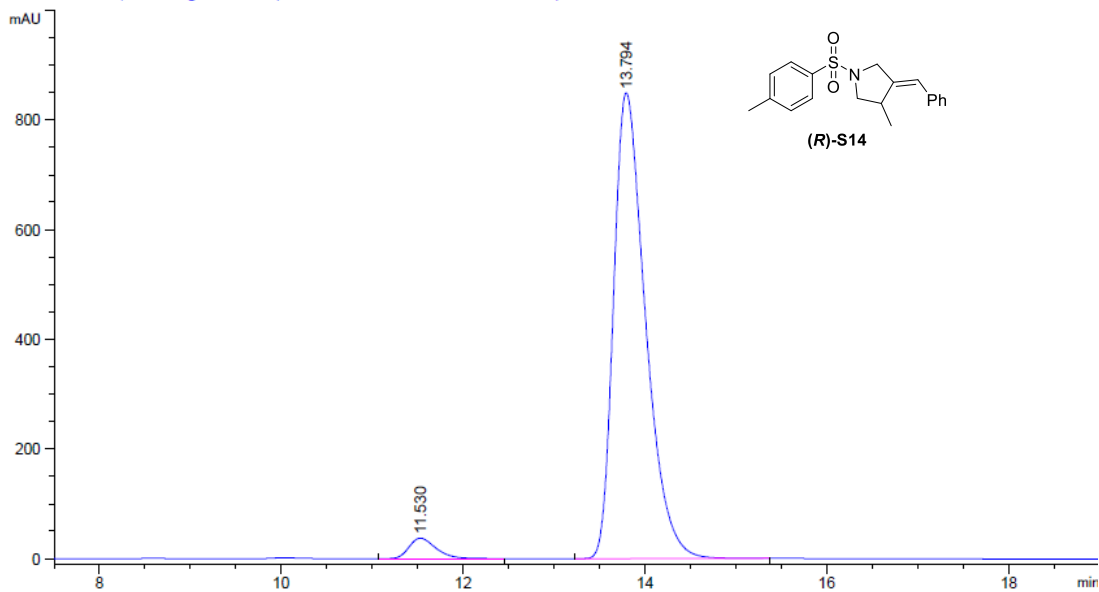

| Peak # | RetTime [min] | Type | Width [min] | Area [mAU*s] | Height [mAU] | Area %  |
|--------|---------------|------|-------------|--------------|--------------|---------|
| 1      | 11.530        | BB   | 0.3164      | 774.02161    | 37.41423     | 3.6197  |
| 2      | 13.794        | BB   | 0.3691      | 2.06095e4    | 849.34552    | 96.3803 |
